# Supplementary material for: Health and economic benefits of reducing sugar intake in the USA, including effects via non-alcoholic fatty liver disease: a microsimulation model
Source: PubMed Central journal article supplement — BMJ Open. 2017 Aug 3;7(8):e013543. doi: 10.1136/bmjopen-2016-013543 (PMC5577881; doi:10.1136/bmjopen-2016-013543), 2017-08-03
Supplement: bmjopen-2016-013543.draft_revisions.pdf [file bmjopen-2016-013543.draft_revisions.pdf]

# BMJ Open

BMJ Open is committed to open peer review. As part of this commitment we make the peer review history of every article we publish publicly available.

When an article is published we post the peer reviewers' comments and the authors' responses online. We also post the versions of the paper that were used during peer review. These are the versions that the peer review comments apply to.

The versions of the paper that follow are the versions that were submitted during the peer review process. They are not the versions of record or the final published versions. They should not be cited or distributed as the published version of this manuscript.

BMJ Open is an open access journal and the full, final, typeset and author-corrected version of record of the manuscript is available on our site with no access controls, subscription charges or pay-per-view fees (<http://bmjopen.bmj.com>).

If you have any questions on BMJ Open's open peer review process please email [editorial.bmjopen@bmj.com](mailto:editorial.bmjopen@bmj.com)

# BMJ Open

## Non-alcoholic fatty liver disease as a mediator of detriments of dietary sugar consumption: implications for the health and economic benefits of interventions in the United States

|                                 |                                                                                                                                                                                                                                                                                                                                                                                                                                                                                                                                                                                                           |
|---------------------------------|-----------------------------------------------------------------------------------------------------------------------------------------------------------------------------------------------------------------------------------------------------------------------------------------------------------------------------------------------------------------------------------------------------------------------------------------------------------------------------------------------------------------------------------------------------------------------------------------------------------|
| Journal:                        | <i>BMJ Open</i>                                                                                                                                                                                                                                                                                                                                                                                                                                                                                                                                                                                           |
| Manuscript ID                   | bmjopen-2016-013543                                                                                                                                                                                                                                                                                                                                                                                                                                                                                                                                                                                       |
| Article Type:                   | Research                                                                                                                                                                                                                                                                                                                                                                                                                                                                                                                                                                                                  |
| Date Submitted by the Author:   | 28-Jul-2016                                                                                                                                                                                                                                                                                                                                                                                                                                                                                                                                                                                               |
| Complete List of Authors:       | Vreman, Rick; University of California, San Francisco, Philip R. Lee Institute for Health Policy Studies<br>Goodell, Alex; University of California, San Francisco, Philip R. Lee Institute for Health Policy Studies<br>Rodriguez, Luis; University of California, Department of Epidemiology & Biostatistics<br>Lustig, Robert; University of California, San Francisco, Philip R. Lee Institute for Health Policy Studies; University of California San Francisco, Department of Pediatrics<br>Kahn, James; University of California, San Francisco, Philip R. Lee Institute for Health Policy Studies |
| <b>Primary Subject Heading</b>: | Public health                                                                                                                                                                                                                                                                                                                                                                                                                                                                                                                                                                                             |
| Secondary Subject Heading:      | Nutrition and metabolism, Health policy, Health economics, Diabetes and endocrinology                                                                                                                                                                                                                                                                                                                                                                                                                                                                                                                     |
| Keywords:                       | Added sugar, Non-alcoholic fatty liver disease, Type 2 diabetes, Microsimulation, Obesity, Fructose                                                                                                                                                                                                                                                                                                                                                                                                                                                                                                       |
|                                 |                                                                                                                                                                                                                                                                                                                                                                                                                                                                                                                                                                                                           |

SCHOLARONE™  
Manuscripts

# Non-alcoholic fatty liver disease as a mediator of detriments of dietary sugar consumption: implications for the health and economic benefits of interventions in the United States

Rick A Vreman<sup>1</sup>, Alex J Goodell<sup>1</sup>, Luis A Rodriguez<sup>2</sup>, Robert H Lustig<sup>1,3</sup>, James G Kahn<sup>1</sup>

<sup>1</sup> Philip R. Lee Institute for Health Policy Studies, University of California San Francisco, California, United States of America;

<sup>2</sup> Department of Epidemiology & Biostatistics, University of California, San Francisco, California, United States of America;

<sup>3</sup> Department of Pediatrics, University of California San Francisco, California, United States of America

Contact information corresponding author:

Rick A Vreman

Lauwerecht 52

3515 GS Utrecht

The Netherlands

T: +31-614661403

E: r.a.vreman@gmail.com

## Abstract

**Objectives:** Excessive consumption of added sugars in the human diet has been associated with obesity, type 2 diabetes (T2D), coronary heart disease (CHD), and other elements of the metabolic syndrome. Recent studies have shown that non-alcoholic fatty liver disease (NAFLD) is a critical pathway to metabolic syndrome. This model assesses the health and economic benefits of interventions aimed at reducing intake of added sugars.

**Methods:** Using data from U.S. National Health Surveys and current literature, we simulated an open cohort, for the period 2015 to 2035. We constructed a microsimulation model with Markov chains for NAFLD (including steatosis, non-alcoholic steatohepatitis (NASH), cirrhosis, and hepatocellular carcinoma (HCC)), body mass index (BMI), T2D, and CHD. We assessed reductions in population disease prevalence, disease-attributable disability-adjusted life years (DALYs), and costs, with interventions that reduce added sugars consumption by either 20% or 50%.

**Findings:** The model estimated that a 20% reduction in added sugars intake will reduce prevalence of hepatic steatosis, NASH, cirrhosis, HCC, obesity, T2D, and CHD. Incidence of T2D and CHD would be expected to decrease by 19.9 (95% CI: 12.8 – 27.0) and 9.4 (95% CI: 3.1 – 15.8) cases per 100,000 people after 20 years, respectively. A 20% reduction in consumption is also projected to annually avert 0.767 million (M) DALYs (95% CI: 0.757M – 0.777M), and a total of 10.3 billion (B) USD (95% CI: 10.2B – 10.4B) in discounted direct medical costs by 2035. These effects increased proportionally when added sugars intake were reduced by 50%.

**Conclusions:** The decrease in incidence and prevalence of disease is similar to results in other models, but averted costs and DALYs were higher, mainly due to inclusion of NAFLD and CHD. Based on this model, societal efforts to reduce consumption of added sugars could result in significant public health and economic benefits.

Strengths and limitations of this study

- No previous model has captured the full effects of added sugars through non-alcoholic fatty liver disease, obesity, type 2 diabetes and coronary heart disease.
- This model is applicable to each intervention that is aimed at reducing added sugars.
- The model is based on input parameters from multiple studies who were not always of excellent quality. We have used large intervals around these parameters to ensure reliable results.

## Introduction

The social and economic burdens of chronic metabolic disease have been increasing in the United States for the last three decades. Two-thirds of the adult population in the United States is now overweight, and morbid obesity affects 9.9% of all adult women [1]. Prevalence of Type 2 diabetes (T2D) in the U.S. is at 9.3%. [2,3] Coronary heart disease (CHD) prevalence increased concurrently from 13 to 15.5 million over the last ten years. [4,5] More than 15% of all deaths are attributable to CHD and more than 3% to diabetes. [6] Costs have simultaneously increased; and costs for CHD are expected to double over the next two decades. [7,8] Though these figures are stunning, they underestimate the magnitude of the problem. Non-alcoholic fatty liver disease (NAFLD) has recently been found to be present in over 30% of the population, and is thought to play an important role in metabolic pathophysiology. [9,10] NAFLD is defined by the presence of liver fat in absence of primary causes such as alcohol and hepatitis C. [11] NAFLD is further categorized into: a) hepatic steatosis, which is a reversible fat accumulation in the liver defined by an occupation of steatotic hepatocytes of more than 5.5% of the liver parenchyma; and b) non-alcoholic steatohepatitis (NASH), which is defined as the presence of hepatic steatosis plus necroinflammation with hepatocyte injury (ballooning) with or without scarring. [9,11,12] NASH can cause scarring and fibrosis to develop (cirrhosis), which is an irreversible process. Cirrhosis can further progress to hepatocellular carcinoma (HCC). [13] NASH is projected to become the leading cause of liver transplantation in the USA by 2020, [14,15] and 30-40% of NASH-cirrhotic patients succumb to a liver-related death within 10 years. [16,17] Hospitalizations for NAFLD have increased 97% between 2000 and 2012. [18] NAFLD has also been suggested as an important driver of T2D in lean individuals, as liver fat accumulation can cause insulin resistance. [10,19-21] Furthermore, NAFLD has been shown to regularly precede the metabolic syndrome, and scientists now argue that NAFLD is the hepatic manifestation of metabolic syndrome, and should be included in its definition. [22-25] It is important to identify determinants of these metabolic diseases and assess the effectivity of upstream policy interventions to curb the national and the global epidemic of metabolic syndrome.

### *Added sugars*

The excessive amount of added sugars (glucose + fructose) in our food supply has been associated with NAFLD and each of the elements in the metabolic syndrome. [26,27,28] Fructose is metabolized into fat in the liver through the process of *de novo* lipogenesis [29], which can result in hepatic steatosis and lead to insulin resistance, causing weight gain and predisposing to T2D. This effect appears to be specific for sugar, and independent of calories consumed or BMI. [29-33, 51] Added sugars consumption has increased in the U.S. over the years 1977-2000, decreased slightly between 2000–2008, and seems to have stabilized in the years thereafter. [34-36] Over 55% of all American adults consumed more than 50 grams of added sugars per day between 2005–2012, which is thought to be the cut-off value for added risk of metabolic derangement, and more than the advised maximum according to the American Heart Association (25 - 37.5 grams). Furthermore, U.S. adolescents during this period averaged 94.0 grams per day. [3,37,38]

### *Intervention effectiveness*

Several studies have modeled the effects of different interventions to reduce added sugars intake. A popular suggestion is the implementation of a sugar-sweetened beverage (SSB) tax. Though this does not affect all added sugars in the food supply, SSB's are the main single contributor to overall added sugars intake, and a tax on SSB's is easier to implement than an added sugars tax. [39] A 20% SSB tax is projected to reduce prevalence of obesity anywhere from 1.5 — 10%, based on different studies. [40-42] Annual diabetes cases would be expected to decline concurrently between 1.8% and 3.4%, and CHD cases by 0.5 — 1.0%. [41,43] Additional research has focused on other strategies to lower added sugars consumption. Banning SSB's from the U.S. Supplemental Nutrition Assistance Program (SNAP) is expected to result in a 0.89% lower obesity prevalence within 10 years, while lowering the amount of sugars in the food supply through a cap and trade approach by 1% annually is expected to lower the prevalence of obesity by 1.7% after 20 years. [44,45]

An important limitation of all these studies is that none of these models incorporate the effects and costs related to sugar-induced NAFLD. Because NAFLD explains a part of the incidence of diabetes in lean individuals and is expected to contribute significantly to overall healthcare burden and costs, it is necessary that modeling incorporate all of these diseases.

Our goal is to predict the health and economic effects of interventions that are designed to reduce added sugars consumption either by 20% or 50%, respectively. We describe the process of creating, calibrating and validating a microsimulation model. We clarify the relevant interactions that determine progression within this model in Markov chains for NAFLD (including cirrhosis and HCC), obesity, T2D, and CHD, and we describe the creation of a simulated open cohort representative of the US population. We allow the model to run for 20 years into the future to predict effectiveness. We report the outcomes of these simulations in future incidence, prevalence and mortality of disease, and in disability-adjusted life years (DALYs) and costs averted.

## Methods

The Methods section is constructed according to the recommendations by the ISPOR taskforce for good modelling practice, and completeness is checked according to the CHEERS statement. [46,47]

### *Summary*

We constructed an individual based model consisting of a base cohort of 22,400 people. New people entered the model each year at age 20, the youngest age group. Individuals get assigned a state at initialization in each 'chain' of the model.

1  
2  
3 These include age, sex, ethnicity, sugar consumption, NAFLD, BMI, T2D, and CHD. The current states of each individual at  
4 the beginning of a cycle form a risk profile, and the presence in a risk inducing state in one of the chains can influence the  
5 probability of transitioning between states in a different chain, according to literature-based odds ratios. We simulated 20  
6 annual cycles for each individual, counting events, incurred direct medical costs, and DALYs for each cycle, as well as the  
7 overall prevalence for the total cohort. We discounted the costs and DALYs by 3.0% annually, and costs were presented in  
8 2015 USD. Two interventions were simulated: one that reduced each individual's added sugars consumption by 20%, and  
9 one that reduced it by 50%. We used identical random numbers for the base case scenario and each of the interventions, to  
10 reduce variance. We calibrated the model to other studies reporting historic trends and predicting future prevalence, and  
11 validated the model via face validation, cross-validation, and sensitivity analyses. Deterministic sensitivity analysis was used  
12 to determine the influence of individual input parameters. Probabilistic sensitivity analysis was used to generate mean  
13 results and 95% confidence intervals.

#### 14 *Model type*

15 An individual-based stochastic Markov model (microsimulation) was used. The model contained a chain for each of four  
16 separate diseases which interact. Because each of these diseases has a minimum of 3 states, and the transitions between  
17 these states are based on the presence or absence of a set of risk factors, the state-space explosion phenomenon prohibits  
18 us from using traditional Markov cohort simulation. A microsimulation approach makes it possible to use individual-specific  
19 transition rates, capturing the effect of interventions on individual risk factor profiles, thereby reducing states and allowing  
20 for complex relationships between several risk factors within a single individual.[48] It also opens up potential for future  
21 analyses among subgroups.

#### 22 *Population and setting*

23 The model is based on the adult population (age 20+) of the United States. Outcomes are reported from a healthcare  
24 perspective. This includes direct medical costs and DALYs averted. Indirect medical or non-medical costs are excluded.  
25 Because this model is meant to assess the benefits of reducing added sugars intake, unrelated to the type of intervention,  
26 costs of implementing any specific intervention and possible revenues (e.g. in the case of an excise or general services tax)  
27 are also excluded.

#### 28 *Model structure and input parameters*

29 A simplified model transition diagram is presented in Figure 1. Individuals will reside in a state within each chain at any  
30 given point in time. The probability of staying within a state or moving to another state in each cycle is determined by a set  
31 of defined transition probabilities, which are influenced by the risk profile (the current state in the other chains) of the  
32 individual. Events in different chains can occur in parallel. The simulation starts when the specific individual gets assigned a  
33 state for his or her age (A), sex (S) and ethnicity (E). Age states are based on the population distribution that is provided by  
34 the Bureau of the Census, and are specified for each age from 20 to 84 and a cumulative age group for anyone above 85.  
35 We simulate an open cohort. New individuals with age 20 will enter each year.[49] Ethnicities incorporated into the model  
36 are Hispanic, non-Hispanic black, and non-Hispanic-white. Data availability did not allow us to incorporate Asians and  
37 Native Americans as separate groups and therefore they were grouped with the non-Hispanic whites. When the individual  
38 is assigned an age, sex and ethnicity, these determine the state that this individual will be assigned to in each of the chains  
39 for NAFLD, BMI, T2D and CHD at the start of the simulation. Because each chain has its own healthy state, but this does not  
40 mean that this person is actually healthy (e.g. a person can have cirrhosis but not diabetes), these healthy states will be  
41 referred to as non-disease states (e.g. non-T2D). The NAFLD chain includes a non-NAFLD state, and states for hepatic  
42 steatosis, NASH, cirrhosis, and NASH- or cirrhosis-related hepatocellular carcinoma. A person is defined as having NAFLD  
43 when his or her current state is steatosis, NASH or cirrhosis. This is different from common terminology, where cirrhosis is  
44 excluded. We chose this definition for easy reference, because these three states infer extra risk for progression within  
45 other chains. It is important to note that modeled cirrhosis and hepatocellular carcinoma are specifically related to steatosis  
46 and NASH, and do not include all cirrhosis and HCC cases within the population, irrespective of cause. Transition directly  
47 from the non-NAFLD state to either one is therefore not possible. The BMI chain includes states for healthy weight,  
48 overweight and obesity. The T2D chain includes a non-T2D state and a T2D state. The CHD chain includes a non-CHD state  
49 and a CHD state. The individual also gets assigned an added sugars consumption. There are two states in the sugar chain —  
50 high consumption ( $\geq 50$ g of added sugars per day), and low consumption ( $< 50$ g of added sugars per day). The distribution of  
51 these states among the study population reflects the data of the NHANES 2005-2012 and is specified per sex and ethnicity  
52 group.[3,37] Sugar consumption is fixed throughout the simulation for each person. Each chain has a death state, called  
53 'non-disease related death'. Three disease chains also have a disease-specific death state (e.g. T2D-death), to easily  
54 calculate disease-attributable death. Transitions to death states are "synchronized" between chains, meaning that death in  
55 one chain forces an instant transition to the death state in other chains.  
56  
57  
58  
59  
60



**Figure 1.** Model structure.

Dotted lines indicate the assignment of a state in each chain at the start of the simulation. Solid lines indicate a possible transition pathway between states. Striped lines indicate how being in a state within one chain can affect the transition probability between two states in another chain. Pink striped lines indicate the effect of NAFLD on progression in the BMI, T2D and CHD chains. Blue striped lines indicate the effect of overweight and obesity on progression in the NAFLD, T2D and CHD chains. The green striped line indicates the effect of T2D on progression in the CHD chain.

BMI: body mass index, NAFLD: non-alcoholic fatty liver disease, T2D: type 2 diabetes, CHD: coronary heart disease, NASH: non-alcoholic steatohepatitis, HCC: hepatocellular carcinoma, DALYs: disability-adjusted life years

Final transition probabilities per chain are compared to a pseudo-random number to determine state-transitions each cycle. These final transition probabilities are derived from a baseline probability that gets corrected for applicable risk factors and annual regression rates. The baseline transition probabilities for HCC incidence, and for T2D and CHD incidence and mortality are age-specific. The correction formula for the baseline transition probabilities is a multiplicative function of all applicable values for present risk factors (odds ratios). The presence of a risk factor, which is determined by the current state in each chain, indicates that there is an “interaction”. Ethnicity interacts with progression in the NAFLD chain up to cirrhosis. Steatosis, NASH, and cirrhosis disease states (collectively defined as NAFLD) interact with progression within the BMI chain, and with the incidence rate in the T2D chain and the CHD chain (pink arrows). Overweight and obesity interact with progression within the NAFLD chain up to cirrhosis, and with incidence rates in the T2D and CHD chains (blue arrows). T2D interacts with the incidence rate of CHD (green arrow). High added sugars consumption interacts with progression between states in the NAFLD chain up to cirrhosis, and with progression within the BMI chain. To determine whether there were temporal trends in incidence or death rates, we plotted the available historic data (1999-2013) and projected this to the future. [5,6,50] These annual “regression rates” were found to be present for the incidence and mortality rate of CHD, and for the non-disease specific mortality rate. We incorporated these regression rates into the model by adjusting the respective baseline transition probabilities before each cycle. To remove confounding because of calculation order, chain calculation order was randomized.

#### Interventions

Two interventions were simulated: a reduction of 20%, and a reduction of 50% in individual added sugars consumption. A 20% reduction in added sugars was simulated because this is the percentage reduction assessed in several studies.[40-42] In addition, a 50% reduction was simulated because the American Heart Association advises 6-9 teaspoons of added sugar (for females and males respectively) as a maximum per day which is approximately 50% of the current average consumption.[3,37,38] The individual added sugars consumption distribution was then split into a dichotomous variable; with people consuming less than or equal to 50 grams of added sugars being considered low consumers, and people consuming more than 50 grams per day being considered high consumers. This model did not incorporate substitutions to other food categories, but it did incorporate the overall added sugars reduction, rather than a sole reduction in SSB consumption used in other studies.[41,43] This makes it possible to capture the overall effects of added sugars, contrary to

the solitary effect of SSB's. The effects of changes in food consumption to other food groups (e.g. proteins, fat) are not modeled. Detrimental effects of these food categories are less well documented and inferior to the effects of added sugars. Our expected effect was based on a reduction in overall calories as well as a reduction in the directly detrimental effects of added sugars, as recent (non-industry sponsored) studies clarify that there appears to be a detrimental effect even irrespective of calories.[26-33, 51] NHANES data was used to reduce individual added sugars consumption by the specified amount. From these data, new distributions were calculated to reflect subgroup consumption patterns. These distributions determined the ratio between individuals in the high and the low risk group, and therefore determine progression within disease chains. Identical random numbers were used between interventions to reduce variance, as described by Stout and Goldie.[52]

#### *Time horizon, cycle length*

The model had a time horizon of 20 years, modelling the calendar years 2015 to 2035. This duration was chosen to make sure effects within chronic diseases (T2D, CHD) were sufficiently visible. Cycle length was 1 year, to ensure accurate modeling of disease progression. Individuals could exit the model through each death state, or live until the end of the simulation.

#### *Outcomes*

Outcomes were incidence, prevalence and mortality of disease, and direct medical costs and DALYs averted. Costs were calculated by multiplying prevalence by discounted disease-attributable costs. DALYs were calculated by adding years lived with disability (YLD) and years of life lost (YLL). YLD was calculated as the product of the prevalence of disease times the discounted disability weight. YLL was calculated by multiplying the discounted health-adjusted life expectancy at death by the amount of people that died in that specific year, given a certain age and sex. The discount rate for costs, disability weights, and life expectancy was 3.0% annually. Health-adjusted life expectancy and discounted life expectancy for males and females for the United States, reported by the Institute for Health Metrics and Evaluation (IHME), are provided in the online supplement.[53]

#### *Input parameter determination*

Model input parameters, their distribution ranges, and their sources are presented in Tables 1 and 2. The parameters that determined demographics and the distribution of risk factors and disease at the start of the simulation are mainly derived from NHIS and NHANES data. If data were not sufficient, current literature was consulted. Baseline transition probabilities were derived from literature data, and where necessary, via calibration. Also when necessary, we used logistic conversion to adjust transition rates to reflect annual probabilities. Interaction values were derived from literature data. For interactions between chains, we used conservative data when possible, to ensure no overestimation of effect size. We took special care to ensure these odds ratios reflect the case for our model, i.e. reflect increased risk due to a reduction in overall added sugars intake, not just a reduction in sugar-sweetened beverage intake, which is more commonly investigated. Regression rates were determined by historic and projected trends reported by the CDC and the American Heart Association.[3,5,49] Costs were derived from American population-based studies and, where necessary, were inflated by the inflation calculator of the United States Department of Labor Statistics to 2015 USD.[54] Costs were calculated as specific disease-attributable costs (i.e. costs for CHD due to diabetes were counted as costs due to CHD rather than costs due to diabetes). This was necessary to prevent overlapping costs. Disability weights were adopted from World Health Organizations' burden of disease estimates and current literature. Specific sources are provided in the tables.

**Table 1.** Model input values and ranges for disease characteristics. Costs are population based, meaning that they include those who do not get care.

| <i>Disease state</i> | <b>Prevalence at simulation start</b> |            |            |             | <b>Costs (annual)</b> |           |             | <b>Disability weights</b> |            |            |             |
|----------------------|---------------------------------------|------------|------------|-------------|-----------------------|-----------|-------------|---------------------------|------------|------------|-------------|
|                      | <i>Mean</i>                           | <i>Min</i> | <i>Max</i> | <i>Ref.</i> | <i>Mean</i>           | <i>SD</i> | <i>Ref.</i> | <i>Mean</i>               | <i>Min</i> | <i>Max</i> | <i>Ref.</i> |
| Steatosis            | 27.955% <sup>#</sup>                  | 18.637%    | 41.933%    | 8,14,16     | 134                   | 50        | 53          | 0.000                     | 0.000      | 0.000      | 50-52       |
| NASH                 | 3.141% <sup>#</sup>                   | 2.094%     | 4.712%     | 8,14,16     | 267                   | 100       | 53          | 0.033                     | 0.017      | 0.066      | 50-52       |
| Cirrhosis            | 0.314% <sup>#</sup>                   | 0.209%     | 0.471%     | 54-56       | 2,861                 | 1073      | 58          | 0.194                     | 0.127      | 0.273      | 10,57       |
| HCC                  | 0.025% <sup>#</sup>                   | 0.017%     | 0.038%     | 59,60       | 42,644                | 15,992    | 61,62       | 0.294                     | 0.199      | 0.411      | 57,59,60    |
| CHD                  | 6.544% <sup>#</sup>                   | -          | -          | 1,6         | 13,233                | 4962      | 6,63        | 0.066                     | 0.043      | 0.095      | 57          |
| T2D                  | 9.447% <sup>#</sup>                   | -          | -          | 1           | 8,170                 | 3064      | 65          | 0.150                     | 0.080      | 0.220      | 57,64       |
| Overweight           | 33.473% <sup>#</sup>                  | -          | -          | 1           | 343                   | 129       | 67          | 0.000                     | 0.000      | 0.000      | 66          |
| Obesity              | 37.391% <sup>#</sup>                  | -          | -          | 1           | 916                   | 344       | 67          | 0.012                     | 0.001      | 0.022      | 66          |

SD: standard deviation, NASH: non-alcoholic steatohepatitis, HCC: hepatocellular carcinoma, CHD: coronary heart disease, T2D: type 2 diabetes. CHD, T2D, overweight, and obesity prevalence are not varied in the sensitivity analyses.  
<sup>#</sup> Age, sex and/or ethnicity specific values are specified in the online supplement.

**Table 2.** Selected model input parameter values and ranges.

| Parameter                                                   |                      |          |         |            |
|-------------------------------------------------------------|----------------------|----------|---------|------------|
| Initialization                                              | Mean                 | Min      | Max     | Source     |
| Age distribution                                            | OS1*                 | -        | -       | [68]       |
| Sex distribution                                            | OS2**                | -        | -       | [68]       |
| Ethnicity distribution                                      | OS3***               | -        | -       | [68]       |
| High sugar consumption                                      | 57.278% <sup>#</sup> | 38.186%  | 85.917% | [2,32]     |
| Baseline transition probabilities <sup>##</sup>             | Mean chance          | Min      | Max     | Source     |
| Non-NAFLD -> steatosis                                      | 0.0100               | 0.006700 | 0.01500 | [69-77]    |
| Non-NAFLD -> NASH                                           | 0.0003               | 0.000201 | 0.00045 | [69-77]    |
| Steatosis -> NASH                                           | 0.0060               | 0.004020 | 0.00900 | [69-77]    |
| Steatosis -> cirrhosis                                      | 0.0002               | 0.000134 | 0.00030 | [69-77]    |
| NASH -> cirrhosis                                           | 0.0020               | 0.001340 | 0.00300 | [69-77]    |
| NASH -> HCC                                                 | 0.0001 <sup>#</sup>  | 0.000067 | 0.00015 | [69-80]    |
| NASH -> liver death                                         | 0.0038               | 0.002546 | 0.00570 | [81-84]    |
| Cirrhosis -> HCC                                            | 0.0200 <sup>#</sup>  | 0.013400 | 0.03000 | [69-80]    |
| Cirrhosis -> liver death                                    | 0.0340               | 0.022780 | 0.05100 | [81-84]    |
| HCC -> liver death                                          | 0.5000               | 0.335000 | 0.75000 | [81-84]    |
| Non-CHD -> CHD                                              | 0.0045 <sup>#</sup>  | 0.003015 | 0.00675 | [85,86]    |
| CHD -> CHD death                                            | 0.0100 <sup>#</sup>  | 0.006700 | 0.01500 | [5, 85,86] |
| Non-T2D -> T2D                                              | 0.0045 <sup>#</sup>  | 0.003015 | 0.00675 | [45,87]    |
| T2D -> T2D death                                            | 0.0100 <sup>#</sup>  | 0.006700 | 0.01500 | [5,45,87]  |
| Healthy weight -> overweight                                | 0.0500               | 0.033500 | 0.07500 | [88-91]    |
| Healthy weight -> obese                                     | 0.0060               | 0.004020 | 0.00900 | [88-91]    |
| Overweight -> obese                                         | 0.0180               | 0.012060 | 0.02700 | [88-91]    |
| Each alive state -> non-disease related death               | 0.0100 <sup>#</sup>  | 0.006700 | 0.01500 | [5]        |
| Risk factors (odds ratios)                                  | Mean value           | Min      | Max     | Source     |
| NHB ethnicity for progression within NAFLD                  | 0.93                 | 0.70     | 1.00    | [92]       |
| Hispanic ethnicity for progression within NAFLD             | 1.67                 | 1.22     | 2.22    | [92]       |
| Overweight for progression within NAFLD                     | 2.19                 | 1.60     | 3.38    | [70,93-98] |
| Obesity for progression within NAFLD                        | 3.14                 | 2.07     | 5.28    | [70,93-98] |
| High sugar consumption for progression within NAFLD         | 2.00                 | 1.50     | 3.00    | [27,99]    |
| NAFLD for TP non-CHD -> CHD                                 | 2.31                 | 1.66     | 3.62    | [100-104]  |
| Overweight for TP non-CHD -> CHD                            | 1.22                 | 1.12     | 1.32    | [105-112]  |
| Obesity for TP non-CHD -> CHD                               | 1.60                 | 1.43     | 1.79    | [105-112]  |
| T2D for TP non-CHD -> CHD                                   | 2.24                 | 1.64     | 3.06    | [113]      |
| NAFLD for TP non-T2D -> T2D                                 | 2.73                 | 1.87     | 4.46    | [114-120]  |
| Overweight for TP non-T2D -> T2D                            | 2.18                 | 1.59     | 3.36    | [121-127]  |
| Obesity for TP non-T2D -> T2D                               | 3.36                 | 2.18     | 5.72    | [121-127]  |
| NAFLD for progression within the BMI chain                  | 2.19                 | 1.60     | 3.38    | [70,93-98] |
| High sugar consumption for progression within the BMI chain | 2.60                 | 1.20     | 6.00    | [128,129]  |

SD: standard deviation, NAFLD: non-alcoholic fatty liver disease (steatosis, NASH & cirrhosis), NASH: non-alcoholic steatohepatitis, HCC: hepatocellular carcinoma, CHD: coronary heart disease, T2D: type 2 diabetes, NHB: non-Hispanic black.

\* See online supplement table 1. \*\* See online supplement table 2. \*\*\* See online supplement table 3.

<sup>#</sup> Age, sex and/or ethnicity specific values are specified in the online supplement.

<sup>##</sup> Transition probabilities for regression to less severe disease are specified in the online supplement.

### Calibration

Incidence, prevalence, mortality and costs of overweight and obesity, T2D, and CHD were calibrated to reflect historic data from the CDC and projections from the American Heart Association (AHA) and several individual studies predicting future disease.[3,7,135-139] NASH- and cirrhosis-related HCC incidence and mortality was calibrated to historic trends reported by the CDC, and future predictions reported by the American Cancer Association.[3,140]

### Validation

Validation of the model occurred via face validation, cross-validation and sensitivity analyses. Face validation was performed manually by the authors. Each chain was checked separately for functionality before merging them. Cross-validation was performed by comparing epidemiological outcomes and predictions from our model with reported results from different studies on each subject, as presented in the Discussion.

Uncertainty was assessed using deterministic and probabilistic sensitivity analysis (DSA & PSA). DSA was conducted using a five-point analysis, with the minima and maxima specified in Tables 1 & 2. If a mean and standard deviation (SD) are specified, we used a range of mean  $\pm$  1.96\*SD. DSA results are only presented for the two main outcomes: total costs and DALYs averted in the year 2035. PSA was conducted using the distributions defined in Tables 1 & 2, to produce a mean and 95% confidence interval for all outcome values by running the simulation 10,000 times (each of which including the base case and two interventions).

### Cohort simulation

To produce stable results, limit computational requirements, and have a cohort that remained representative of the U.S. population, we simulated a base cohort of 22,400 people, with new entry of 416 people each year, reflecting CDC population prospects.<sup>[44]</sup> Because of computational requirements, the model was built in Golang programming language (Google Inc, Mountain View, CA). Model code is publicly available via <https://github.com/alexgoodell/go-mdism> or can be acquired through the corresponding author. Sensitivity analyses were conducted using a 20-machine cluster (Amazon Web Services, Seattle, WA). Outcome analysis was completed in Excel 2010 (Microsoft, Redmond, WA).

## Results

### Incidence and mortality

The incidence of T2D, CHD, and HCC and the corresponding death rates in the year 2035 are stated in Table 3. Diabetes incidence is expected to rise over the next 20 years, resulting in an incidence rate of 1035 cases per 100,000 people. The interventions are expected to reduce this by 19.9 and 83.5 respectively. CHD incidence is expected to rise to 665 cases per 100,000 people by 2035. This can be reduced by 9.4 and 39 cases by the 20% and the 50% intervention respectively. NASH- or cirrhosis-related hepatocellular carcinoma incidence will rise to 4.4 cases per 100,000 people. Interventions could reduce this amount by 0.3 and 1.3 respectively. Liver death can be due to HCC, or it can be related to NASH or cirrhosis in the absence of HCC. Liver-related deaths will rise substantially, to 19.8 deaths per 100,000 people by 2035. This can be reduced by 1.4 or 5.8 deaths per 100,000 people by the 20% and 50% intervention, respectively.

**Table 3.** Annual occurring and averted events in 2035

| Per 100,000 people |                        |                        |                  |                     |                  |
|--------------------|------------------------|------------------------|------------------|---------------------|------------------|
| Events             | No intervention (CI)   | 20% red. (CI)          | Difference (CI)  | 50% red. (CI)       | Difference (CI)  |
| T2D cases          | 1034.6 (1031.0-1038.2) | 1014.7 (1011.3-1018.2) | 19.9 (12.8-27.0) | 951.2 (947.9-954.4) | 83.5 (76.7-90.3) |
| T2D deaths         | 576.6 (574.2-578.9)    | 569.3 (567.0-571.6)    | 7.2 (2.7-11.8)   | 546.4 (544.2-548.6) | 30.2 (25.7-34.6) |
| CHD cases          | 665.1 (661.9-668.2)    | 655.6 (652.5-658.8)    | 9.4 (3.1-15.8)   | 626.1 (623.1-629.1) | 39.0 (32.8-45.2) |
| CHD deaths         | 203.6 (202.2-205.0)    | 201.9 (200.5-203.3)    | 1.6 (-1.2-4.4)   | 197.2 (195.9-198.6) | 6.3 (3.6-9.1)    |
| HCC cases          | 4.4 (4.32-4.41)        | 4.0 (3.95-4.05)        | 0.3 (0.24-0.39)  | 3.1 (3.02-3.18)     | 1.3 (1.24-1.38)  |
| Liver deaths       | 19.8 (19.65-20.02)     | 18.5 (18.29-18.63)     | 1.4 (1.02-1.73)  | 14.1 (13.94-14.21)  | 5.8 (5.44-6.08)  |

NASH: non-alcoholic steatohepatitis; HCC: hepatocellular carcinoma; CHD: coronary heart disease; T2D: type 2 diabetes mellitus; CI: 95% confidence interval.

Numbers might not add up due to rounding.

### Prevalence

Figure 2, graphs A-H show the reduction in prevalence of disease due to the two intervention strategies. A 20% reduction in added sugars consumption is expected to decrease prevalence of each disease state significantly after 20 years, except for overweight prevalence, which does not change significantly. A 50% reduction in added sugars consumption will proportionally affect prevalence. Effects on T2D and CHD prevalences are starting to accumulate after an initial 3-year lag period. Overweight prevalence is not reduced because people that regress to the normal weight group are replaced by others that were obese. This effect is clarified by the drop in obesity prevalence.

**Figure 2, graphs A to H.** reduction in population prevalence of disease due to interventions. Lines represent mean values +/- one standard deviation. 0% is the baseline, representing no intervention. The blue lines with diamonds indicate a reduction of added sugar of 20%. The red lines with crosses represent a reduction of 50%. NASH; non-alcoholic steatohepatitis.



Costs & DALYs

An overview of economic findings is presented in Table 4. Overall costs for the modeled disease states could be reduced by 2.26% (95% CI 2.23% — 2.29%) by the year 2035 with an intervention that reduces added sugars intake by 20%. The 50% intervention will reduce overall costs by 6.99% (95% CI: 6.91 — 7.08). DALY burden and averted DALYs are presented in Table 5. Total amount of DALYs could be reduced by 4.32% (95% CI: 4.27% — 4.38%) or 13.37% (95% CI: 13.24% — 13.51%) respectively. The majority of averted DALYs are due to reduced mortality.

**Table 4.** Annual costs spent and averted per disease state in 2035

In billions 2015 USD, discounted by 3.0% annually

| State        | No intervention (CI)       | 20% reduction (CI)         | Difference (CI)         | 50% reduction (CI)         | Difference (CI)         |
|--------------|----------------------------|----------------------------|-------------------------|----------------------------|-------------------------|
| Steatosis    | 6.48 (6.43-6.53)           | 6.40 (6.35-6.45)           | 0.08 (0.080-0.082)      | 6.23 (6.18-6.28)           | 0.25 (0.248-0.255)      |
| NASH         | 5.26 (5.22-5.30)           | 4.89 (4.85-4.93)           | 0.37 (0.368-0.375)      | 4.11 (4.08-4.14)           | 1.15 (1.139-1.162)      |
| Cirrhosis    | 7.00 (6.93-7.07)           | 6.22 (6.16-6.28)           | 0.78 (0.772-0.791)      | 4.60 (4.56-4.65)           | 2.40 (2.371-2.429)      |
| HCC          | 5.10 (5.04-5.16)           | 4.55 (4.50-4.60)           | 0.55 (0.537-0.558)      | 3.40 (3.36-3.44)           | 1.70 (1.669-1.721)      |
| CHD          | 162.2 (160.9-163.6)        | 160.1 (158.8-161.5)        | 2.09 (2.06-2.12)        | 155.7 (154.4-157.0)        | 6.51 (6.43-6.58)        |
| T2D          | 200.0 (198.4-201.6)        | 195.9 (194.3-197.5)        | 4.07 (4.02-4.12)        | 187.4 (185.9-188.9)        | 12.59 (12.46-12.73)     |
| Overweight   | 16.4 (16.3-16.5)           | 16.6 (16.5-16.8)           | -0.25 (-0.26 - -0.25)   | 17.2 (17.1-17.3)           | -0.79 (-0.81 - -0.78)   |
| Obesity      | 52.7 (52.3-53.1)           | 50.1 (49.7-50.5)           | 2.59 (2.57-2.62)        | 44.7 (44.3-45.0)           | 8.03 (7.95-8.12)        |
| <b>Total</b> | <b>455.1 (451.4-458.9)</b> | <b>444.9 (441.2-448.5)</b> | <b>10.3 (10.2-10.4)</b> | <b>423.3 (419.8-426.8)</b> | <b>31.8 (31.5-32.2)</b> |

NASH: non-alcoholic steatohepatitis; HCC: hepatocellular carcinoma; CHD: coronary heart disease; T2D: type 2 diabetes mellitus; CI: 95% confidence interval. Numbers might not add up due to rounding.

**Table 5.** Annual occurring and averted DALYs in 2035

In millions

| State          | No intervention (CI)       | 20% reduction (CI)         | Difference (CI)            | 50% reduction (CI)         | Difference (CI)            |
|----------------|----------------------------|----------------------------|----------------------------|----------------------------|----------------------------|
| NASH           | 2.97 (2.955-2.988)         | 2.76 (2.746-2.777)         | 0.210 (0.209-0.212)        | 2.32 (2.309-2.334)         | 0.650 (0.645-0.655)        |
| Cirrhosis      | 0.48 (0.475-0.482)         | 0.42 (0.422-0.428)         | 0.053 (0.053-0.054)        | 0.31 (0.312-0.316)         | 0.164 (0.162-0.165)        |
| HCC            | 3.06 (3.046-3.084)         | 2.78 (2.765-2.799)         | 0.283 (0.279-0.283)        | 2.19 (2.180-2.206)         | 0.872 (0.863-0.881)        |
| CHD            | 2.32 (2.305-2.330)         | 2.29 (2.276-2.302)         | 0.028 (0.028-0.029)        | 2.23 (2.217-2.242)         | 0.088 (0.086-0.090)        |
| T2D            | 8.21 (8.180-8.248)         | 8.06 (8.023-8.089)         | 0.158 (0.155-0.160)        | 7.72 (7.690-7.752)         | 0.492 (0.487-0.498)        |
| Obesity        | 0.69 (0.689-0.700)         | 0.66 (0.655-0.666)         | 0.034 (0.034-0.035)        | 0.59 (0.584-0.593)         | 0.106 (0.105-0.107)        |
| <b>Total</b>   | <b>17.74 (17.65-17.83)</b> | <b>16.97 (16.89-17.06)</b> | <b>0.767 (0.757-0.777)</b> | <b>15.37 (15.29-15.44)</b> | <b>2.372 (2.348-2.396)</b> |
| From mortality | 11.94                      | 11.50                      | 0.439                      | 10.58                      | 1.357                      |
| From morbidity | 5.80                       | 5.47                       | 0.328                      | 4.78                       | 1.015                      |

NASH: non-alcoholic steatohepatitis; HCC: hepatocellular carcinoma; CHD: coronary heart disease; T2D: type 2 diabetes mellitus; CI: 95% confidence interval. Numbers might not add up due to rounding.

Sensitivity analyses

We show tornado diagrams for the two most important outcomes: annual costs and DALYs averted by the year 2035 due to an intervention that reduces sugar consumption by 20%. The diagrams show the impact that specific input parameters had on selected results. The ten variables that caused the widest range in results are shown. When varying individual variables, the annual savings by the year 2035 range from 7.9 to 17.1 billion 2015 USD. The tornado diagram (Figure 3) shows that the interaction between high added sugars consumption and the progression within the NAFLD and BMI chains had the greatest impact on total costs averted. In the tornado diagram for total annual DALYs averted by the 20% intervention in the year 2035 (Figure 4), assigned disability weights had the greatest impact. Total DALYs averted ranged between 0.36 and 1.41 million.



Figure 3. Tornado diagram of the ten most critical variables on total costs averted in the year 2035.



Figure 4. Tornado diagram of the ten most critical variables on total DALYs averted in the year 2035.

## Discussion

This model shows clear and significant benefits for interventions that reduce consumption of added sugars. A reduction by 20% will reduce annual direct medical costs for U.S. adults by more than 10 billion USD (2015 dollars) by the year 2035. A 50% reduction will save an additional 21 billion. Together with these economic benefits, population health will significantly improve. A total of 770,000 DALYs could be averted with a 20% reduction in consumption. A 50% reduction in consumption will avert another 1.6 million DALYs. These health and economic benefits are the direct result of lower incidence, prevalence, and mortality of disease in U.S. adults due to lower added sugars consumption.

### *Fit with current knowledge*

The estimate for health and economic benefit of this model is similar to a number of previously performed economic evaluations. Basu et al. found a reduction in diabetes incidence of 21.7 cases per 100,000 people with a reduction of 20% of added sugars through a cap and trade approach, limiting the amount of sugars in the food supply.[45] We found a reduction of 19.9 cases per 100,000 people, indicating a similar absolute effect size. CHD incidence reduction is estimated to be about 1.5-fold higher than found in a similar study, but we argue that this is mainly because the other study simulated a 20% tax on sugar-sweetened beverages, and therefore the overall added sugars consumption reduction was smaller than the 20% reduction we simulated.[41] In an econometric analysis looking backward in time, Basu et al. found a delay of 3 years between changes in sugar consumption and prevalence of diabetes.[31] Similarly, we found a delay of 3 years going forward in time between reduction of consumption and reduction in prevalence of disease. Prevalence of obesity has been reported to drop by 1.5% — 10% due to a reduction of added sugars by 10% — 20%.[40-42] Our result of 2.1% reduction in obesity prevalence seems to reflect our conservative approach in determining input parameter values.

Costs savings are bigger in our model compared to other models.[41,43,44] This was for three reasons. First, some other models do not use added sugars as a whole but use SSB's, resulting in a smaller effect. Second, our overall prevalence of T2D and CHD is higher than most other models. We have calibrated our model to historic trends reported by the CDC and to future projections of the AHA, ADA and separate studies predicting future prevalence, and therefore argue that our estimate is valid. Third, and perhaps most importantly, no other studies predict future NAFLD prevalence. We present the first model that estimates the effects of sugar interventions on NAFLD prevalence and associated costs and DALYs.

### *Strengths and limitations*

This study is the first of its kind to model the effect of added sugars on NAFLD as well as on BMI, and therefore it captures a more complete picture of the possible health and economic benefits of interventions that reduce intake of added sugars. Though taxing sugar-sweetened products, mainly beverages, has been widely suggested as a public health strategy, other approaches, e.g. a cap and trade approach, have also been suggested.[39-45] We have constructed this model to be applicable with each of these interventions, so that it does not rely on any consumption statistics other than added sugars as a whole. A limitation to this approach is that our model does not incorporate a possible change to non-sugared caloric products, containing protein, fat, or other carbohydrates. It is important that effort is put into investigating self- and cross-elasticity of sugar-sweetened products to determine the effect of these caloric replacements. Though this is a limitation, research has clearly shown that the contribution of added sugars in relation to their excessive intake is likely the most important consumption factor for metabolic derangement. Furthermore, added sugars consumption was fixed throughout the simulation for each individual (though specified per sex and ethnic group). We could not find sufficient data on changes in sugar consumption related to incident disease and therefore could not model these changes accurately enough. We argue that keeping the sugar consumption fixed is likely more accurate than modeling changing sugar consumption based solely on age. The main limitation of this model is the uncertainty of input parameters. The pathophysiology of NAFLD and its associations with other metabolic diseases is still widely under investigation. Therefore, baseline transition probabilities and interaction (OR) values are still somewhat uncertain. Many studies report associations, but very few studies report plausible quantitative causal relationships. There are several reasons that explain this low number of studies. First, it is hard to accurately determine the individual components in an individuals' diet. Second, there is no cheap, accurate way to determine the presence of individual NAFLD states. Commonly used ultrasonography possibly underestimates the prevalence of NAFLD and does not differentiate between steatosis and NASH, while up to 79% of patients may have serum alanine aminotransferase (ALT) levels within the normal reference range of < 40 U/mL.[9,141] We have addressed this uncertainty by taking wide ranges in the probabilistic sensitivity analysis, which determines the SD and 95% confidence interval around the results. Results remain statistically significant, indicating that any minor inaccuracies in input parameter values will not render the effects insignificant. Ultimately, it is desirable to determine incidence of NAFLD states and risk factor relative risks in independent prospective cohort studies, and to assess intervention effectiveness via randomized controlled trials. This model can be refined and updated when new data become available.

It is possible that our results might still underestimate the total effects. We only modeled diagnosed disease, we took a conservative approach when determining input parameter values, and we did not take societal costs into account. Real health, healthcare, and economic benefits are likely larger than estimated.

### Implications

This model clarifies the significant health and economic benefits that could be achieved by a public health intervention that reduces consumption of added sugars in U.S. adults. We recommend that health policy makers review their options to implement interventions.

### Future research

Future research should focus on establishing a more precise measurement of NAFLD prevalence, incidence, and risk factors. Furthermore, magnitude and effects of switching to different food groups should be assessed. Finally, changes in added sugars consumption related to ageing and incident disease should be more intensively investigated.

### Contributor statement

RAV was involved in conceptualizing the study, reviewing literature, conducting the modeling analysis, analyzing the data and writing the manuscript. AJG was involved in conducting the modeling analysis and in editing the paper. LAR and RHL were involved in conceptualizing the model, providing and structuring data inputs and editing the manuscript. JGK was involved in conceptualization of the model, input data review, guiding the modeling process and providing a critical review of the manuscript. All authors read and approved the final manuscript.

### Competing interests

The authors declare no direct conflicts of interest. However, Dr. Lustig has received author fees from Hudson Street Press regarding his authorship of: "Fat Chance: Beating the Odds Against Sugar, Processed Food, Obesity, and Disease"; "The Fat Chance Cookbook"; and "Sugar has 56 names: A Shopper's Guide". He is also the unpaid president of the non-profit Institute for Responsible Nutrition.

### Financial support

No financial support was provided for this study.

### Data sharing statement

An online supplement will be made available containing comprehensive tables of used input data. The modeling code is available through github: <https://github.com/alexgoodell/go-mdism> or can be accessed via the corresponding author.

### References

1. Flegal KM, Kruszon-Moran D, Carroll MD, Fryar CD, Ogden CL. Trends in Obesity Among Adults in the United States, 2005 to 2014. *JAMA*. 2016 Jun 7;315(21):2284-91. doi: 10.1001/jama.2016.6458.
2. Centers for Disease Control and Prevention. National Center for Health Statistics. Health Data Interactive. Accessed at [www.cdc.gov/nchs/hdi.htm](http://www.cdc.gov/nchs/hdi.htm) on Apr 23, 2015.
3. Centers for Disease Control and Prevention. National Center for Health Statistics. National Health and Nutrition Examination Survey Data. Hyattsville, MD: U.S. Department of Health and Human Services, Centers for Disease Control and Prevention. 2005-2012. <http://www.cdc.gov/nchs/nhanes.htm>.
4. American Heart Association. Heart Disease and Stroke Statistics — 2005 Update. Dallas, Texas.: American Heart Association; 2005.
5. Mozaffarian D, Benjamin EJ, Go AS, Arnett DK, Blaha MJ, Cushman M, et al. Heart Disease and Stroke Statistics—2015 Update: A Report From the American Heart Association. *Circulation*. 2015 Jan 27;131(4):e29-322. doi: 10.1161/CIR.0000000000000152
6. Centers for Disease Control and Prevention. National Center for Health Statistics. Underlying Cause of Death 1999-2013 on CDC WONDER Online Database, released 2015. Data are from the Multiple Cause of Death Files, 1999-2013, as compiled from data provided by the 57 vital statistics jurisdictions through the Vital Statistics Cooperative Program. Accessed at <http://wonder.cdc.gov/ucd-icd10.html> on Apr 16, 2015.
7. Heidenreich PA, Trogdon JG, Khavjou OA, Butler J, Dracup K, Ezekowitz MD, et al. Forecasting the future of cardiovascular disease in the United States: a policy statement from the American Heart Association. *Circulation*. 2011 Mar 1;123(8):933-44. doi: 10.1161/CIR.0b013e31820a55f5
8. American Diabetes Association. Economic costs of diabetes in the U.S. In 2007. *Diabetes Care*. 2008 Mar;31(3):596-615. doi: 10.2337/dc08-9017.
9. Browning JD, Szczepaniak LS, Dobbins R, Nuremberg P, Horton JD, Cohen JC, et al. Prevalence of hepatic steatosis in an urban population in the United States: impact of ethnicity. *Hepatology*. 2004 Dec;40(6):1387-95.
10. Yki-Järvinen H. Non-alcoholic fatty liver disease as a cause and a consequence of metabolic syndrome. *Lancet Diabetes Endocrinol*. 2014 Nov;2(11):901-10. doi: 10.1016/S2213-8587(14)70032-4.
11. Chalasani N(1), Younossi Z, Lavine JE, Diehl AM, Brunt EM, Cusi K, et al. The diagnosis and management of non-alcoholic fatty liver disease: practice guideline by the American Gastroenterological Association, American Association for the Study of Liver Diseases, and American College of Gastroenterology. *Gastroenterology*. 2012 Jun;142(7):1592-609. doi: 10.1053/j.gastro.2012.04.001.
12. Tiniakos DG. Nonalcoholic fatty liver disease/nonalcoholic steatohepatitis: histological diagnostic criteria and scoring systems. *Eur J Gastroenterol Hepatol*. 2010 Jun;22(6):643-50. doi: 10.1097/MEG.0b013e32832ca0cb.
13. Farazi PA, DePinho RA. Hepatocellular carcinoma pathogenesis: from genes to environment. *Nat Rev Cancer*. 2006 Sep;6(9):674-87.
14. Wree A, Broderick L, Canbay A, Hoffman HM, Feldstein AE. From NAFLD to NASH to cirrhosis-new insights into disease mechanisms. *Nat Rev Gastroenterol Hepatol*. 2013 Nov;10(11):627-36. doi: 10.1038/nrgastro.2013.149.
15. Mahady SE, George J. Management of nonalcoholic steatohepatitis: an evidence-based approach. *Clin Liver Dis*. 2012 Aug;16(3):631-45. doi: 10.1016/j.cld.2012.05.003.

16. Review Team, LaBrecque DR, Abbas Z, Anania F, Ferenci P, Khan AG, Goh KL, et al. World Gastroenterology Organisation global guidelines: Nonalcoholic fatty liver disease and nonalcoholic steatohepatitis. *J Clin Gastroenterol*. 2014 Jul;48(6):467-73. doi: 10.1097/MCG.000000000000116.
17. Williams CD, Stengel J, Asike MI, Torres DM, Shaw J, Contreras M, et al. Prevalence of non-alcoholic fatty liver disease and nonalcoholic steatohepatitis among a largely middle-aged population utilizing ultrasound and liver biopsy: a prospective study. *Gastroenterology*. 2011 Jan;140(1):124-31. doi: 10.1053/j.gastro.2010.09.038.
18. Peery AF, Dellon ES, Lund J, Crockett SD, McGowan CE, Bulsiewicz WJ, et al. Burden of gastrointestinal disease in the United States: 2012 update. *Gastroenterology*. 2012 Nov;143(5):1179-87.e1-3. doi: 10.1053/j.gastro.2012.08.002.
19. Gastaldelli A, Cusi K, Pettiti M, Hardies J, Miyazaki Y, Berria R, et al. Relationship between hepatic/visceral fat and hepatic insulin resistance in nondiabetic and type 2 diabetic subjects. *Gastroenterology*. 2007 Aug;133(2):496-506. Epub 2007 May 1.
20. Dietrich P, Hellerbrand C. Non-alcoholic fatty liver disease, obesity and the metabolic syndrome. *Best Pract Res Clin Gastroenterol*. 2014 Aug;28(4):637-53. doi: 10.1016/j.bpg.2014.07.008.
21. Fukuda T, Hamaguchi M, Kojima T, Hashimoto Y, Ohbora A, Kato T, et al. The impact of non-alcoholic fatty liver disease on incident type 2 diabetes mellitus in non-overweight individuals. *Liver Int*. 2015 Jul 14. doi: 10.1111/liv.12912.
22. Sattar N, McConnachie A, Ford I, Gaw A, Cleland SJ, Forouhi NG, et al. Serial metabolic measurements and conversion to type 2 diabetes in the west of Scotland coronary prevention study: specific elevations in alanine aminotransferase and triglycerides suggest hepatic fat accumulation as a potential contributing factor. *Diabetes*. 2007 Apr;56(4):984-91.
23. Thomas EL, Brynes AE, Hamilton G, Patel N, Spong A, Goldin RD, et al. Effect of nutritional counselling on hepatic, muscle and adipose tissue fat content and distribution in non-alcoholic fatty liver disease. *World J Gastroenterol*. 2006 Sep 28;12(36):5813-9.
24. Vanni E, Bugianesi E, Kotronen A, De Minicis S, Yki-Järvinen H, Svegliati-Baroni G. From the metabolic syndrome to NAFLD or vice versa? *Dig Liver Dis*. 2010 May;42(5):320-30. doi: 10.1016/j.dld.2010.01.016.
25. Larson-Meyer DE, Heilbronn LK, Redman LM, Newcomer BR, Frisard MI, Anton S, et al. Effect of calorie restriction with or without exercise on insulin sensitivity, beta-cell function, fat cell size, and ectopic lipid in overweight subjects. *Diabetes Care*. 2006 Jun;29(6):1337-44.
26. Yang Q, Zhang Z, Gregg EW, Flanders WD, Merritt R, Hu FB. Added sugar intake and cardiovascular diseases mortality among US adults. *JAMA Intern Med*. 2014 Apr;174(4):516-24. doi: 10.1001/jamainternmed.2013.13563.
27. Basu S, Yoffe P, Hills N, Lustig RH. The relationship of sugar to population-level diabetes prevalence: an econometric analysis of repeated cross-sectional data. *PLoS One*. 2013;8(2):e57873. doi: 10.1371/journal.pone.0057873.
28. Abid A, Taha O, Nseir W, Farah R, Grosovski M, Assy N. Soft drink consumption is associated with fatty liver disease independent of metabolic syndrome. *J Hepatol*. 2009 Nov;51(5):918-24. doi: 10.1016/j.jhep.2009.05.033.
29. Lustig RH. Fructose: it's alcohol without the "buzz". *Adv Nutr* 2013;4: 226-235. doi: 10.3945/an.112.002998.
30. Lustig RH, Mulligan K, Noworolski S, Gugliucci A, Erkin-Cakmak A, Wen MJ, Tai VW, Schwarz JM: Isocaloric fructose restriction and metabolic improvement in children with obesity and metabolic syndrome. *Obesity* 24:453-460, 2016. doi: 10.1002/oby.21371.
31. Schwarz JM, Noworolski SM, Wen MJ, Dyachenko A, Prior JL, Weinberg ME, et al. Effect of a High-Fructose Weight-Maintaining Diet on Lipogenesis and Liver Fat. *J Clin Endocrinol Metab*. 2015 Jun;100(6):2434-42. doi: 10.1210/jc.2014-3678.
32. Imamura F, O'Connor L, Ye Z, Mursu J, Hayashino Y, Bhupathiraju SN, et al. Consumption of sugar sweetened beverages, artificially sweetened beverages, and fruit juice and incidence of type 2 diabetes: systematic review, meta-analysis, and estimation of population attributable fraction. *BMJ*. 2015 Jul 21;351:h3576. doi: 10.1136/bmj.h3576.
33. Bray GA, Popkin BM. Dietary sugar and body weight: have we reached a crisis in the epidemic of obesity and diabetes?: health be damned! Pour on the sugar. *Diabetes Care*. 2014 Apr;37(4):950-6. doi: 10.2337/dc13-2085.
34. Marriott BP, Cole N, Lee E. National estimates of dietary fructose intake increased from 1977 to 2004 in the United States. *J Nutr*. 2009 Jun;139(6):1228S-1235S. doi: 10.3945/jn.108.098277.
35. Wang DD, Leung CW, Li Y, Ding EL, Chiuve SE, Hu FB, et al. Trends in dietary quality among adults in the United States, 1999 through 2010. *JAMA Intern Med*. 2014 Oct;174(10):1587-95. doi: 10.1001/jamainternmed.2014.3422.
36. Welsh JA, Sharma AJ, Grellinger L, Vos MB. Consumption of added sugars is decreasing in the United States. *Am J Clin Nutr*. 2011 Sep;94(3):726-34. doi: 10.3945/ajcn.111.018366.
37. Rodriguez LA, Madsen KA, Cotterman C, Lustig RH: Added sugar intake and metabolic syndrome in US adolescents: cross-sectional analysis of NHANES 2005-2012. *Public Health Nutrition* 2016, epub Mar 23, doi:10.1017/S1368980016000057.
38. Johnson RK, Appel LJ, Brands M, Howard BV, Lefevre M, Lustig RH, et al. Dietary sugars intake and cardiovascular health: a scientific statement from the American Heart Association. *Circulation*. 2009 Sep 15;120(11):1011-20. doi: 10.1161/CIRCULATIONAHA.109.192627.
39. Brownell KD, Farley T, Willett WC, Popkin BM, Chaloupka FJ, Thompson JW, et al. The public health and economic benefits of taxing sugar-sweetened beverages. *N Engl J Med*. 2009 Oct 15;361(16):1599-605. doi: 10.1056/NEJMp0905723.
40. Mytton O, Eyles H, Ogilvie D. Evaluating the Health Impacts of Food and Beverage Taxes. *Curr. Obes. Rep*. 2014 Dec; 3(4):432-439.
41. Wang YC, Coxson P, Shen YM, Goldman L, Bibbins-Domingo K. A penny-per-ounce tax on sugar-sweetened beverages would cut health and cost burdens of diabetes. *Health Aff (Millwood)*. 2012 Jan;31(1):199-207. doi: 10.1377/hlthaff.2011.0410.
42. Smith TA, Lin B, Lee J. Taxing Caloric Sweetened Beverages: Potential Effects on Beverage Consumption, Calorie Intake, and Obesity, ERR-100, U.S. Department of Agriculture, Economic Research Service, July 2010.
43. Mekonnen TA, Odden MC, Coxson PG, Guzman D, Lightwood J, Wang YC, et al. Health benefits of reducing sugar-sweetened beverage intake in high risk populations of California: results from the cardiovascular disease (CVD) policy model. *PLoS One*. 2013 Dec 11;8(12):e81723. doi: 10.1371/journal.pone.0081723.
44. Basu S, Seligman HK, Gardner C, Bhattacharya J. Ending SNAP subsidies for sugar-sweetened beverages could reduce obesity and type 2 diabetes. *Health Aff (Millwood)*. 2014 Jun;33(6):1032-9. doi: 10.1377/hlthaff.2013.1246.
45. Basu S, Lewis K. Reducing added sugars in the food supply through a cap-and-trade approach. *Am J Public Health*. 2014 Dec;104(12):2432-8. doi: 10.2105/AJPH.2014.302170.

46. Caro JJ, Briggs AH, Siebert U, Kuntz KM; ISPOR-SMDM Modeling Good Research Practices Task Force. Modeling good research practices--overview: a report of the ISPOR-SMDM Modeling Good Research Practices Task Force--1. *Value Health*. 2012 Sep-Oct;15(6):796-803. doi: 10.1016/j.jval.2012.06.012.
47. Husereau D, Drummond M, Petrou S, Carswell C, Moher D, Greenberg D, et al. Consolidated Health Economic Evaluation Reporting Standards (CHEERS)--explanation and elaboration: a report of the ISPOR Health Economic Evaluation Publication Guidelines Good Reporting Practices Task Force. *Value Health*. 2013 Mar-Apr;16(2):231-50. doi: 10.1016/j.jval.2013.02.002.
48. Stewart WJ. *Introduction to the Numerical Solution of Markov Chains*. 1st ed. Princeton: Princeton University Press; 1994.
49. U.S. Census Bureau, Population Division. Table 9: Projections of the Population by Sex and Age for the United States: 2015 to 2060 (NP2014-T9). 2014. Accessed on <http://www.census.gov/population/projections/> at Apr 23, 2015.
50. Geiss LS, Wang J, Cheng YJ, Thompson TJ, Barker L, Li Y, et al. Prevalence and incidence trends for diagnosed diabetes among adults aged 20 to 79 years, United States, 1980-2012. *JAMA*. 2014 Sep 24;312(12):1218-26. doi: 10.1001/jama.2014.11494.
51. Lim JS, Mietus-Snyder M, Valente A, Schwarz JM, Lustig RH. The role of fructose in the pathogenesis of NAFLD and the metabolic syndrome. *Nat Rev Gastroenterol Hepatol*. 2010 May;7(5):251-64. doi: 10.1038/nrgastro.2010.41.
52. Stout NK, Goldie SJ. Keeping the noise down: common random numbers for disease simulation modeling. *Health Care Manag Sci*. 2008 Dec;11(4):399-406.
53. Online supplement table 17 and 18. Available online.
54. United States Department of Labor. CPI Inflation Calculator. Available: [http://www.bls.gov/data/inflation\\_calculator.htm](http://www.bls.gov/data/inflation_calculator.htm)
55. Foster T, Anania FA, Li D, Katz R, Budoff M. The prevalence and clinical correlates of nonalcoholic fatty liver disease (NAFLD) in African Americans: the multi ethnic study of atherosclerosis (MESA). *Dig Dis Sci*. 2013 Aug;58(8):2392-8. doi: 10.1007/s10620-013-2652-7.
56. Farrell GC, Larter CZ. Nonalcoholic fatty liver disease: from steatosis to cirrhosis. *Hepatology*. 2006 Feb;43(2 Suppl 1):S99-S112.
57. Zhang E1, Wartelle-Bladou C, Lepanto L, Lachaine J, Cloutier G, Tang A. Cost-utility analysis of nonalcoholic steatohepatitis screening. *Eur Radiol*. 2015 May 21. [Epub ahead of print]
58. Baumeister SE1, Völzke H, Marschall P, John U, Schmidt CO, Flessa S, et al. Impact of fatty liver disease on health care utilization and costs in a general population: a 5-year observation. *Gastroenterology*. 2008 Jan;134(1):85-94.
59. Adams LA, Lymp JF, St Sauver J, Sandersen SO, Lindor KD, Feldstein A, et al. The natural history of nonalcoholic fatty liver disease: a population-based cohort study. *Gastroenterology*. 2005 Jul;129(1):113-21.
60. Ascha MS, Hanouneh IA, Lopez R, Tamimi TA, Feldstein AF, Zein NN. The incidence and risk factors of hepatocellular carcinoma in patients with nonalcoholic steatohepatitis. *Hepatology*. 2010 Jun;51(6):1972-8. doi: 10.1002/hep.23527.
61. Bambha K, Belt P, Abraham M, Wilson LA, Pabst M, Ferrell L, et al; Nonalcoholic Steatohepatitis Clinical Research Network Research Group. Ethnicity and nonalcoholic fatty liver disease. *Hepatology*. 2012 Mar;55(3):769-80. doi: 10.1002/hep.24726.
62. Murray CJ, Vos T, Lozano R, Naghavi M, Flaxman AD, Michaud C, et al. Disability-adjusted life years (DALYs) for 291 diseases and injuries in 21 regions, 1990-2010: a systematic analysis for the Global Burden of Disease Study 2010. *Lancet*. 2012 Dec 15;380(9859):2197-223. doi: 10.1016/S0140-6736(12)61689-4.
63. McAdam-Marx C1, McGarry LJ, Hane CA, Biskupiak J, Deniz B, Brixner DI. All-cause and incremental per patient per year cost associated with chronic hepatitis C virus and associated liver complications in the United States: a managed care perspective. *J Manag Care Pharm*. 2011 Sep;17(7):531-46.
64. Michelotti GA, Machado MV, Diehl AM. NAFLD, NASH and liver cancer. *Nat Rev Gastroenterol Hepatol*. 2013 Nov;10(11):656-65. doi: 10.1038/nrgastro.2013.183.
65. Page JM, Harrison SA. NASH and HCC. *Clin Liver Dis*. 2009 Nov;13(4):631-47. doi: 10.1016/j.cld.2009.07.007.
66. Patel D, Terrault NA, Yao FY, Bass NM, Ladabaum U. Cost-effectiveness of hepatocellular carcinoma surveillance in patients with hepatitis C virus-related cirrhosis. *Clin Gastroenterol Hepatol*. 2005 Jan;3(1):75-84.
67. Thein HH, Isaranuwachai W, Campitelli MA, Feld JJ, Yoshida E, Sherman M, et al. Health care costs associated with hepatocellular carcinoma: a population-based study. *Hepatology*. 2013 Oct;58(4):1375-84. doi: 10.1002/hep.26231. Epub 2013 Mar 15.
68. Lightwood J, Bibbins-Domingo K, Coxson P, Wang YC, Williams L, Goldman L. Forecasting the future economic burden of current adolescent overweight: an estimate of the coronary heart disease policy model. *Am J Public Health*. 2009 Dec;99(12):2230-7. doi: 10.2105/AJPH.2008.152595.
69. Darbà J1, Kaskens LZ, Detournay B3, Kern W4, Nicolucci A5, Orozco-Beltrán D6, et al. Disability-adjusted life years lost due to diabetes in France, Italy, Germany, Spain, and the United Kingdom: a burden of illness study. *Clinicoecon Outcomes Res*. 2015 Mar 23;7:163-71. doi: 10.2147/CEOR.S78132.
70. American Diabetes Association. Economic costs of diabetes in the U.S. in 2012. *Diabetes Care*. 2013 Apr;36(4):1033-46. doi: 10.2337/dc12-2625.
71. Keating CL1, Peeters A, Swinburn BA, Magliano DJ, Moodie ML. Utility-based quality of life associated with overweight and obesity: the Australian diabetes, obesity, and lifestyle study. *Obesity (Silver Spring)*. 2013 Mar;21(3):652-5. doi: 10.1002/oby.20290.
72. Li Q, Blume SW, Huang JC, Hammer M, Graf TR. The Economic Burden of Obesity by Glycemic Stage in the United States. *Pharmacoeconomics*. 2015 Jul;33(7):735-48. doi: 10.1007/s40273-014-0248-5.
73. U.S. Census Bureau, Population Division. Population Estimates. Accessed on <http://www.census.gov/popest/index.html> at Apr 23, 2015.
74. Anstee QM, Targher G, Day CP. Progression of NAFLD to diabetes mellitus, cardiovascular disease or cirrhosis. *Nat Rev Gastroenterol Hepatol*. 2013 Jun;10(6):330-44. doi: 10.1038/nrgastro.2013.41.
75. Bruno S, Maisonneuve P, Castellana P, Rotmensz N, Rossi S, Maggioni M, et al. Incidence and risk factors for non-alcoholic steatohepatitis: prospective study of 5408 women enrolled in Italian tamoxifen chemoprevention trial. *BMJ*. 2005 Apr 23;330(7497):932.
76. Ekstedt M, Franzén LE, Mathiesen UL, Thorelius L, Holmqvist M, Bodemar G, et al. Long-term follow-up of patients with NAFLD and elevated liver enzymes. *Hepatology*. 2006 Oct;44(4):865-73.
77. Haukeland JW, Lorgen I, Schreiner LT, Frigstad SO, Brandsaeter B, Bjørø K, et al. Incidence rates and causes of cirrhosis in a Norwegian population. *Scand J Gastroenterol*. 2007 Dec;42(12):1501-8.
78. Musso G, Cassader M, Bo S, De Michieli F, Gambino R. Sterol regulatory element-binding factor 2 (SREBF-2) predicts 7-year NAFLD incidence and severity of liverdisease and lipoprotein and glucose dysmetabolism. *Diabetes*. 2013 Apr;62(4):1109-20. doi: 10.2337/db12-0858.
79. Omagari K, Kadokawa Y, Masuda J, Egawa I, Sawa T, Hazama H, et al. Fatty liver in non-alcoholic non-overweight Japanese adults: incidence and clinical characteristics. *J Gastroenterol Hepatol*. 2002 Oct;17(10):1098-105.

80. Rafiq N, Bai C, Fang Y, Srishord M, McCullough A, Gramlich T, et al. Long-term follow-up of patients with nonalcoholic fatty liver. *Clin Gastroenterol Hepatol*. 2009 Feb;7(2):234-8. doi: 10.1016/j.cgh.2008.11.005.
81. Wong VW, Wong GL, Yeung DK, Lau TK, Chan CK, Chim AM, et al. Incidence of non-alcoholic fatty liver disease in Hong Kong: a population study with paired proton-magnetic resonance spectroscopy. *J Hepatol*. 2015 Jan;62(1):182-9. doi: 10.1016/j.jhep.2014.08.041.
82. Zelber-Sagi S1, Lotan R, Shlomai A, Webb M, Harrari G, Buch A, et al. Predictors for incidence and remission of NAFLD in the general population during a seven-year prospective follow-up. *J Hepatol*. 2012 May;56(5):1145-51. doi: 10.1016/j.jhep.2011.12.011.
83. Kawamura Y, Arase Y, Ikeda K, Seko Y, Imai N, Hosaka T, et al. Large-scale long-term follow-up study of Japanese patients with non-alcoholic fatty liver disease for the onset of hepatocellular carcinoma. *Am J Gastroenterol*. 2012 Feb;107(2):253-61. doi: 10.1038/ajg.2011.327.
84. Njei B, Rotman Y, Ditha I, Lim JK. Emerging trends in hepatocellular carcinoma incidence and mortality. *Hepatology*. 2015 Jan;61(1):191-9. doi: 10.1002/hep.27388.
85. El-Serag HB, Mason AC. Rising incidence of hepatocellular carcinoma in the United States. *N Engl J Med*. 1999 Mar 11;340(10):745-50.
86. Lazo M, Hernaez R, Bonekamp S, Kamel IR, Brancati FL, Guallar E, et al. Non-alcoholic fatty liver disease and mortality among US adults: prospective cohort study. *BMJ*. 2011 Nov 18;343:d6891. doi: 10.1136/bmj.d6891.
87. Stepanova M, Rafiq N, Makhlof H, Agrawal R, Kaur I, Younoszai Z, et al. Predictors of all-cause mortality and liver-related mortality in patients with non-alcoholic fatty liver disease (NAFLD). *Dig Dis Sci*. 2013 Oct;58(10):3017-23. doi: 10.1007/s10620-013-2743-5.
88. Söderberg C, Stål P, Askling J, Glaumann H, Lindberg G, Marmur J, et al. Decreased survival of subjects with elevated liver function tests during a 28-year follow-up. *Hepatology*. 2010 Feb;51(2):595-602. doi: 10.1002/hep.23314.
89. Hafidaddottir S, Jonasson JG, Norland H, Einarsdottir SO, Kleiner DE, Lund SH. Long-term follow-up and liver-related death rate in patients with non-alcoholic and alcoholic related fatty liver disease. *BMC Gastroenterol*. 2014 Sep 27;14:166. doi: 10.1186/1471-230X-14-166.
90. National Heart, Lung, and Blood Institute . Morbidity & Mortality: 2012 Chart Book on Cardiovascular, Lung, and Blood Diseases. National Institutes of Health. National Heart, Lung, and Blood Institute. 2012.
91. National Heart, Lung, and Blood Institute . Incidence and Prevalence: 2006 Chart Book on Cardiovascular and Lung Diseases. National Institutes of Health. National Heart, Lung, and Blood Institute. 2006.
92. Fishman EL, Stokes A, Preston SH. The dynamics of diabetes among birth cohorts in the U.S. *Diabetes Care*. 2014 Apr;37(4):1052-9. doi: 10.2337/dc13-1982.
93. Daouli J, Davillas A, Demoussis M, Giannakopoulos N. Obesity persistence and duration dependence: evidence from a cohort of US adults (1985-2010). *Econ Hum Biol*. 2014 Jan;12:30-44. doi: 10.1016/j.ehb.2013.07.002.
94. Gordon-Larsen P, Adair LS, Nelson MC, Popkin BM. Five-year obesity incidence in the transition period between adolescence and adulthood: the National Longitudinal Study of Adolescent Health. *Am J Clin Nutr*. 2004 Sep;80(3):569-75.
95. Parikh NI, Pencina MJ, Wang TJ, Lanier KJ, Fox CS, D'Agostino RB, et al. Increasing trends in incidence of overweight and obesity over 5 decades. *Am J Med*. 2007 Mar;120(3):242-50.
96. Williamson DF, Kahn HS, Byers T. The 10-y incidence of obesity and major weight gain in black and white US women aged 30-55 y. *Am J Clin Nutr*. 1991 Jun;53(6 Suppl):1515S-1518S.
97. Schneider ALC, Lazo M, Selvin E, Clark JM. Racial differences in nonalcoholic fatty liver disease in the U.S. population. *Obesity (Silver Spring)*. 2014;22(1):292-299. doi:10.1002/oby.20426.
98. Kelishadi R, Cook SR, Adibi A, Faghihimani Z, Ghatrehsamani S, Beihaghi A, et al. Association of the components of the metabolic syndrome with non-alcoholic fatty liver disease among normal-weight, overweight and obese children and adolescents. *Diabetol Metab Syndr*. 2009 Dec 22;1:29. doi: 10.1186/1758-5996-1-29.
99. Peng L, Wang J, Li F. Weight reduction for non-alcoholic fatty liver disease. *Cochrane Database Syst Rev*. 2011 Jun 15;(6):CD003619. doi: 10.1002/14651858.CD003619.pub3.
100. Dassanayake AS, Kasturiratne A, Rajindrajith S, Kalubowila U, Chakrawarthy S, De Silva AP, et al. Prevalence and risk factors for non-alcoholic fatty liver disease among adults in an urban Sri Lankan population. *J Gastroenterol Hepatol*. 2009 Jul;24(7):1284-8. doi: 10.1111/j.1440-1746.2009.05831.x.
101. Lee K, Sung JA, Kim JS, Park TJ. The roles of obesity and gender on the relationship between metabolic risk factors and non-alcoholic fatty liver disease in Koreans. *Diabetes Metab Res Rev*. 2009 Feb;25(2):150-5. doi: 10.1002/dmrr.924.
102. Zeb I, Katz R, Nasir K, Ding J, Rezaeian P, Budoff MJ. Relation of nonalcoholic fatty liver disease to the metabolic syndrome: the Multi-Ethnic Study of Atherosclerosis. *J Cardiovasc Comput Tomogr*. 2013 Sep-Oct;7(5):311-8. doi: 10.1016/j.jcct.2013.08.011.
103. Chan WK, Tan AT, Vethakkan SR, Tah PC, Vijayanathan A, Goh KL. Non-alcoholic fatty liver disease in diabetics—prevalence and predictive factors in a multiracial hospital clinic population in Malaysia. *J Gastroenterol Hepatol*. 2013 Aug;28(8):1375-83. doi: 10.1111/jgh.12204.
104. Papandreou D, Karabouta Z, Pantoleon A, Rousso I. Investigation of anthropometric, biochemical and dietary parameters of obese children with and without non-alcoholic fatty liver disease. *Appetite*. 2012 Dec;59(3):939-44. doi: 10.1016/j.appet.2012.09.006.
105. Wong VW, Wong GL, Yip GW, Lo AO, Limquiaco J, Chu WC, et al. Coronary artery disease and cardiovascular outcomes in patients with non-alcoholic fatty liver disease. *Gut*. 2011 Dec;60(12):1721-7. doi: 10.1136/gut.2011.242016.
106. Hamaguchi M, Kojima T, Takeda N, Nagata C, Takeda J, Sarui H, et al. Nonalcoholic fatty liver disease is a novel predictor of cardiovascular disease. *World J Gastroenterol*. 2007 Mar 14;13(10):1579-84.
107. Fan JG, Li F, Cai XB, Peng YD, Ao QH, Gao Y. Effects of nonalcoholic fatty liver disease on the development of metabolic disorders. *J Gastroenterol Hepatol*. 22, 1086–1091 (2007).
108. Targher G, Bertolini L, Rodella S, Tessari R, Zenari L, Lippi G, et al. Nonalcoholic fatty liver disease is independently associated with an increased incidence of cardiovascular events in type 2 diabetic patients. *Diabetes Care* 30, 2119–2121 (2007).
109. Treeprasertsuk S, Leverage S, Adams LA, Lindor KD, St Sauver J, Angulo P. The Framingham risk score and heart disease in nonalcoholic fatty liver disease. *Liver Int*. 32, 945–950 (2012).
110. Canoy D, Cairns BJ, Balkwill A, Wright FL, Green J, Reeves G, et al. Body mass index and incident coronary heart disease in women: a population-based prospective study. *BMC Med*. 2013 Apr 2;11:87. doi: 10.1186/1741-7015-11-87.
111. Global Burden of Metabolic Risk Factors for Chronic Diseases Collaboration (BMI Mediated Effects), Lu Y, Hajifathalian K, Ezzati M, Woodward M, Rimm EB, Danaei G. Metabolic mediators of the effects of body-mass index, overweight, and obesity on coronary heart disease and stroke: a pooled analysis of 97 prospective cohorts with 1.8 million participants. *Lancet*. 2014 Mar 15;383(9921):970-83. doi: 10.1016/S0140-6736(13)61836-X.

- 1
  - 2
  - 3
  - 4
  - 5
  - 6
  - 7
  - 8
  - 9
  - 10
  - 11
  - 12
  - 13
  - 14
  - 15
  - 16
  - 17
  - 18
  - 19
  - 20
  - 21
  - 22
  - 23
  - 24
  - 25
  - 26
  - 27
  - 28
  - 29
  - 30
  - 31
  - 32
  - 33
  - 34
  - 35
  - 36
  - 37
  - 38
  - 39
  - 40
  - 41
  - 42
  - 43
  - 44
  - 45
  - 46
  - 47
  - 48
  - 49
  - 50
  - 51
  - 52
  - 53
  - 54
  - 55
  - 56
  - 57
  - 58
  - 59
  - 60
112. Gruson E, Montaye M, Kee F, Wagner A, Bingham A, Ruidavets JB, et al. Anthropometric assessment of abdominal obesity and coronary heart disease risk in men: the PRIME study. *Heart*. 2010 Jan;96(2):136-40. doi: 10.1136/hrt.2009.171447.
113. de Hollander EL, Bogers RP, Boshuizen HC, Rosengren A, Shipley MJ, Knekt P, et al. Influence of calendar period on the association between BMI and coronary heart disease: a meta-analysis of 31 cohorts. *Obesity (Silver Spring)*. 2013 May;21(5):865-80. doi: 10.1002/oby.20043.
114. Labounty TM, Gomez MJ, Achenbach S, Al-Mallah M, Berman DS, Budoff MJ, et al. Body mass index and the prevalence, severity, and risk of coronary artery disease: an international multicentre study of 13,874 patients. *Eur Heart J Cardiovasc Imaging*. 2013 May;14(5):456-63. doi: 10.1093/ehjci/jes179.
115. Mongraw-Chaffin ML, Peters SA, Huxley RR, Woodward M. The sex-specific association between BMI and coronary heart disease: a systematic review and meta-analysis of 95 cohorts with 1.2 million participants. *Lancet Diabetes Endocrinol*. 2015 Jun;3(6):437-49. doi: 10.1016/S2213-8587(15)00086-8.
116. Park YS, Kim JS. Obesity phenotype and coronary heart disease risk as estimated by the Framingham risk score. *J Korean Med Sci*. 2012 Mar;27(3):243-9. doi: 10.3346/jkms.2012.27.3.243.
117. Taylor AE, Ebrahim S, Ben-Shlomo Y, Martin RM, Whincup PH, Yarnell JW, et al. Comparison of the associations of body mass index and measures of central adiposity and fat mass with coronary heart disease, diabetes, and all-cause mortality: a study using data from 4 UK cohorts. *Am J Clin Nutr*. 2010 Mar;91(3):547-56. doi: 10.3945/ajcn.2009.28757.
118. Peters SA, Huxley RR, Woodward M. Diabetes as risk factor for incident coronary heart disease in women compared with men: a systematic review and meta-analysis of 64 cohorts including 858,507 individuals and 28,203 coronary events. *Diabetologia*. 2014 Aug;57(8):1542-51. doi: 10.1007/s00125-014-3260-6.
119. Shibata M, Kihara Y, Taguchi M, Tashiro M, Otsuki M. Nonalcoholic fatty liver disease is a risk factor for type 2 diabetes in middle-aged Japanese men. *Diabetes Care* 30, 2940–2944 (2007).
120. Kim CH, Park JY, Lee KU, Kim JH, Kim HK. Fatty liver is an independent risk factor for the development of Type 2 diabetes in Korean adults. *Diabet. Med*. 25, 476–481 (2008).
121. Yamada T, Fukatsu M, Suzuki S, Wada T, Yoshida T, Joh T. Fatty liver predicts impaired fasting glucose and type 2 diabetes mellitus in Japanese undergoing a health checkup. *J Gastroenterol. Hepatol*. 25, 352–356 (2010).
122. Sung KC, Kim SH. Interrelationship between fatty liver and insulin resistance in the development of type 2 diabetes. *J. Clin. Endocrinol. Metab*. 96, 1093–1097 (2011).
123. Bae JC, Rhee EJ, Lee WY, Park SE, Park CY, Oh KW, et al. Combined effect of nonalcoholic fatty liver disease and impaired fasting glucose on the development of type 2 diabetes: a 4 year retrospective longitudinal study. *Diabetes Care* 34, 727–729 (2011).
124. Sung KC, Jeong WS, Wild SH, Byrne CD. Combined influence of insulin resistance, overweight/obesity, and fatty liver as risk factors for type 2 diabetes. *Diabetes Care* 35, 717–722 (2012).
125. Kasturiratne A, Weerasinghe S, Dassanayake AS, Rajindrajith S, de Silva AP, Kato N, et al. Influence of non-alcoholic fatty liver disease on the development of diabetes mellitus. *J Gastroenterol Hepatol*. 2013 Jan;28(1):142-7. doi: 10.1111/j.1440-1746.2012.07264.x.
126. Abdullah A, Peeters A, de Courten M, Stoelwinder J. The magnitude of association between overweight and obesity and the risk of diabetes: a meta-analysis of prospective cohort studies. *Diabetes Res Clin Pract*. 2010 Sep;89(3):309-19. doi: 10.1016/j.diabres.2010.04.012.
127. Nyamdorj R, Qiao Q, Söderberg S, Pitkaniemi JM, Zimmet PZ, Shaw JE, et al. BMI compared with central obesity indicators as a predictor of diabetes incidence in Mauritius. *Obesity (Silver Spring)*. 2009 Feb;17(2):342-8. doi: 10.1038/oby.2008.503.
128. Rolando L, Byrne DW, McGown PW, Goetzl RZ, Elasy TA, Yarbrough MI. Health risk factor modification predicts incidence of diabetes in an employee population: results of an 8-year longitudinal cohort study. *J Occup Environ Med*. 2013 Apr;55(4):410-5. doi: 10.1097/JOM.0b013e31827cbaec.
129. Rodbard HW, Bays HE, Gavin JR 3rd, Green AJ, Bazata DD, Lewis SJ, et al. Rate and risk predictors for development of self-reported type-2 diabetes mellitus over a 5-year period: the SHIELD study. *Int J Clin Pract*. 2012 Jul;66(7):684-91. doi: 10.1111/j.1742-1241.2012.02952.x.
130. Kodama S, Horikawa C, Fujihara K, Yoshizawa S, Yachi Y, Tanaka S. Quantitative relationship between body weight gain in adulthood and incident type 2 diabetes: a meta-analysis. *Obes Rev*. 2014 Mar;15(3):202-14. doi: 10.1111/obr.12129.
131. Bell JA, Kivimaki M, Hamer M. Metabolically healthy obesity and risk of incident type 2 diabetes: a meta-analysis of prospective cohort studies. *Obes Rev*. 2014 Jun;15(6):504-15. doi: 10.1111/obr.12157.
132. Guh DP, Zhang W, Bansback N, Amarsi Z, Birmingham CL, Anis AH. The incidence of co-morbidities related to obesity and overweight: a systematic review and meta-analysis. *BMC Public Health*. 2009 Mar 25;9:88. doi: 10.1186/1471-2458-9-88.
133. Emond JA, Patterson RE, Jardack PM, Arab L. Using doubly labeled water to validate associations between sugar-sweetened beverage intake and body mass among White and African-American adults. *Int J Obes (Lond)*. 2014 Apr;38(4):603-9. doi: 10.1038/ijo.2013.130.
134. Grimes CA, Riddell LJ, Campbell KJ, Nowson CA. Dietary salt intake, sugar-sweetened beverage consumption, and obesity risk. *Pediatrics*. 2013 Jan;131(1):14-21. doi: 10.1542/peds.2012-1628.
135. Gregg EW, Boyle JP, Thompson TJ, Barker LE, Albright AL, Williamson DF. Modeling the impact of prevention policies on future diabetes prevalence in the United States: 2010-2030. *Popul Health Metr*. 2013 Sep 18;11(1):18. doi: 10.1186/1478-7954-11-18.
136. Guariguata L, Whiting DR, Hambleton I, Beagley J, Linnenkamp U, Shaw JE. Global estimates of diabetes prevalence for 2013 and projections for 2035. *Diabetes Res Clin Pract*. 2014 Feb;103(2):137-49. doi: 10.1016/j.diabres.2013.11.002.
137. Huang ES, Basu A, O'Grady M, Capretta JC. Projecting the future diabetes population size and related costs for the U.S. *Diabetes Care*. 2009 Dec;32(12):2225-9. doi: 10.2337/dc09-0459.
138. Finkelstein EA, Khavjou OA, Thompson H, Trogdon JG, Pan L, Sherry B, et al. Obesity and severe obesity forecasts through 2030. *Am J Prev Med*. 2012 Jun;42(6):563-70. doi: 10.1016/j.amepre.2011.10.026.
139. Odden MC, Coxson PG, Moran A, Lightwood JM, Goldman L, Bibbins-Domingo K. The impact of the aging population on coronary heart disease in the United States. *Am J Med*. 2011 Sep;124(9):827-33.e5. doi: 10.1016/j.amjmed.2011.04.010.
140. American Cancer Society. *Cancer Facts & Figures 2012*. Atlanta: American Cancer Society; 2012.
141. Saadeh S, Younossi ZM, Remer EM, Gramlich T, Ong JP, Hurley M, et al. The utility of radiological imaging in nonalcoholic fatty liver disease. *Gastroenterology*. 2002 Sep;123(3):745-50.

## Online supplement

## Non-alcoholic fatty liver disease as a mediator of sugar effects; implications for the health and economic benefits of interventions in the US

*Rick A Vreman, Alex J Goodell, Luis A Rodriguez, Robert H Lustig, James G Kahn*

### Content

|                                                                                                        |    |
|--------------------------------------------------------------------------------------------------------|----|
| <b>Table 1.</b> Selected model parameter values and ranges .....                                       | 2  |
| <b>Table 2.</b> Age distribution .....                                                                 | 3  |
| <b>Table 3.</b> Sex distribution.....                                                                  | 4  |
| <b>Table 4.</b> Ethnic distribution .....                                                              | 4  |
| <b>Table 5.</b> Non-alcoholic fatty liver disease prevalence percentage at start of simulation.....    | 4  |
| <b>Table 6.</b> Coronary heart disease prevalence percentage at the start of the simulation .....      | 5  |
| <b>Table 7.</b> Type 2 diabetes prevalence percentage at the start of the simulation.....              | 6  |
| <b>Table 8.</b> Overweight and obesity prevalence percentages at the start of the simulation .....     | 7  |
| <b>Table 9.</b> Added sugar consumption distributions.....                                             | 7  |
| <b>Table 10.</b> Hepatocellular carcinoma incidence rate from NASH .....                               | 8  |
| <b>Table 11.</b> Hepatocellular carcinoma incidence rate from cirrhosis.....                           | 8  |
| <b>Table 12.</b> Coronary heart disease incidence rate (in %).....                                     | 9  |
| <b>Table 13.</b> Coronary heart disease mortality rate (in %).....                                     | 9  |
| <b>Table 14.</b> Type 2 diabetes incidence rate.....                                                   | 10 |
| <b>Table 15.</b> Type 2 diabetes mortality rate .....                                                  | 10 |
| <b>Table 16.</b> Non-disease related mortality rate (in %) .....                                       | 11 |
| <b>Table 17.</b> IHME health-adjusted life expectancy and discounted life expectancy for females ..... | 12 |
| <b>Table 18.</b> IHME health-adjusted life expectancy and discounted life expectancy for males .....   | 13 |
| <b>References</b> .....                                                                                | 14 |

Table 1. Selected model parameter values and ranges.

| Parameter                                                   | Distribution | Mean      | Min      | Max     | Source     |
|-------------------------------------------------------------|--------------|-----------|----------|---------|------------|
| <b>Initialization</b>                                       |              |           |          |         |            |
| Age distribution                                            | Fixed        | OS2*1     | -        | -       | [1]        |
| Sex distribution                                            | Fixed        | OS3*2     | -        | -       | [1]        |
| Ethnicity distribution                                      | Fixed        | OS4*3     | -        | -       | [1]        |
| Steatosis prevalence                                        | Beta         | 27.955%*4 | 18.637%  | 41.933% | [2-4]      |
| NASH prevalence                                             | Beta         | 3.141%*4  | 2.094%   | 4.712%  | [2-4]      |
| Cirrhosis prevalence                                        | Beta         | 0.314%*4  | 0.209%   | 0.471%  | [5-8]      |
| HCC prevalence                                              | Beta         | 0.025%*4  | 0.017%   | 0.038%  | [9,10]     |
| CHD prevalence                                              | Fixed        | 6.544%*5  | -        | -       | [11]       |
| T2D prevalence                                              | Fixed        | 9.447%*6  | -        | -       | [11]       |
| Overweight prevalence                                       | Fixed        | 33.473%*7 | -        | -       | [11]       |
| Obesity prevalence                                          | Fixed        | 37.391%*8 | -        | -       | [11]       |
| High sugar consumption                                      | Beta         | 57.278%*9 | 38.186%  | 85.917% | [12,13]    |
| <b>Baseline transition probabilities</b>                    |              |           |          |         |            |
| Non-NAFLD -> steatosis                                      | Beta         | 0.0100    | 0.006700 | 0.01500 | [14-22]    |
| Non-NAFLD -> NASH                                           | Beta         | 0.0003    | 0.000201 | 0.00045 | [14-22]    |
| Steatosis -> non-NAFLD                                      | Beta         | 0.0200    | 0.013400 | 0.03000 | [14-22]    |
| Steatosis -> NASH                                           | Beta         | 0.0060    | 0.004020 | 0.00900 | [14-22]    |
| Steatosis -> cirrhosis                                      | Beta         | 0.0002    | 0.000134 | 0.00030 | [14-22]    |
| NASH -> non-NAFLD                                           | Beta         | 0.0010    | 0.000670 | 0.00150 | [14-22]    |
| NASH -> steatosis                                           | Beta         | 0.0200    | 0.013400 | 0.03000 | [14-22]    |
| NASH -> cirrhosis                                           | Beta         | 0.0020    | 0.001340 | 0.00300 | [14-22]    |
| NASH -> HCC                                                 | Beta         | 0.0001*10 | 0.000067 | 0.00015 | [14-25]    |
| NASH -> liver death                                         | Beta         | 0.0038    | 0.002546 | 0.00570 | [26-29]    |
| Cirrhosis -> HCC                                            | Beta         | 0.0200*10 | 0.013400 | 0.03000 | [14-25]    |
| Cirrhosis -> liver death                                    | Beta         | 0.0340    | 0.022780 | 0.05100 | [26-29]    |
| HCC -> liver death                                          | Beta         | 0.5000    | 0.335000 | 0.75000 | [26-29]    |
| Non-CHD -> CHD                                              | Beta         | 0.0045*11 | 0.003015 | 0.00675 | [30,31]    |
| CHD -> CHD death                                            | Beta         | 0.0100*12 | 0.006700 | 0.01500 | [30-32]    |
| Non-T2D -> T2D                                              | Beta         | 0.0045*13 | 0.003015 | 0.00675 | [33,34]    |
| T2D -> T2D death                                            | Beta         | 0.0100*14 | 0.006700 | 0.01500 | [32-34]    |
| Healthy weight -> overweight                                | Beta         | 0.0500    | 0.033500 | 0.07500 | [35-38]    |
| Healthy weight -> obese                                     | Beta         | 0.0060    | 0.004020 | 0.00900 | [35-38]    |
| Overweight -> healthy weight                                | Beta         | 0.0500    | 0.033500 | 0.07500 | [35-38]    |
| Overweight -> obese                                         | Beta         | 0.0180    | 0.012060 | 0.02700 | [35-38]    |
| Obese -> healthy weight                                     | Beta         | 0.0060    | 0.004020 | 0.00900 | [35-38]    |
| Obese -> overweight                                         | Beta         | 0.0350    | 0.023450 | 0.05250 | [35-38]    |
| Each alive state -> non-disease related death               | Beta         | 0.0100*15 | 0.006700 | 0.01500 | [32]       |
| <b>Risk factors</b>                                         |              |           |          |         |            |
| NHB ethnicity for progression within NAFLD                  | Beta         | 0.93      | 0.70     | 1.00    | [39]       |
| Hispanic ethnicity for progression within NAFLD             | Beta         | 1.67      | 1.22     | 2.22    | [39]       |
| Overweight for progression within NAFLD                     | Beta         | 2.19      | 1.60     | 3.38    | [15,40-45] |
| Obesity for progression within NAFLD                        | Beta         | 3.14      | 2.07     | 5.28    | [15,40-45] |
| High sugar consumption for progression within NAFLD         | Beta         | 2.00      | 1.50     | 3.00    | [46,47]    |
| NAFLD for TP non-CHD -> CHD                                 | Beta         | 2.31      | 1.66     | 3.62    | [48-52]    |
| Overweight for TP non-CHD -> CHD                            | Beta         | 1.22      | 1.12     | 1.32    | [53-60]    |
| Obesity for TP non-CHD -> CHD                               | Beta         | 1.60      | 1.43     | 1.79    | [53-60]    |
| T2D for TP non-CHD -> CHD                                   | Beta         | 2.24      | 1.64     | 3.06    | [61]       |
| NAFLD for TP non-T2D -> T2D                                 | Beta         | 2.73      | 1.87     | 4.46    | [62-68]    |
| Overweight for TP non-T2D -> T2D                            | Beta         | 2.18      | 1.59     | 3.36    | [69-75]    |
| Obesity for TP non-T2D -> T2D                               | Beta         | 3.36      | 2.18     | 5.72    | [69-75]    |
| NAFLD for progression within the BMI chain                  | Beta         | 2.19      | 1.60     | 3.38    | [15,40-45] |
| High sugar consumption for progression within the BMI chain | Beta         | 2.60      | 1.20     | 6.00    | [76,77]    |
| <b>Regression rates</b>                                     |              |           |          |         |            |
| CHD incidence regression rate/year                          | Beta         | 0.985     | 0.970    | 1.00    | [78-81]    |
| CHD mortality regression rate/year                          | Beta         | 0.979     | 0.958    | 1.00    | [78-81]    |
| Non-disease mortality regression rate/year (20-30)          | Beta         | 1.000     | 0.990    | 1.00    | [32]       |
| Non-disease mortality regression rate/year (30-55)          | Beta         | 0.980     | 0.960    | 1.00    | [32]       |
| Non-disease mortality regression rate/year (55+)            | Beta         | 0.970     | 0.940    | 1.00    | [32]       |

1  
2  
3  
4  
5  
6  
7  
8  
9  
10  
11  
12  
13  
14  
15  
16  
17  
18  
19  
20  
21  
22  
23

| Table 1. Continued                         |  |              |            |       |         |
|--------------------------------------------|--|--------------|------------|-------|---------|
| Costs (annual direct medical, in 2015 USD) |  | Distribution | Mean value | SD    | Source  |
| Steatosis                                  |  | Gamma        | 134        | 50    | [82-85] |
| NASH                                       |  | Gamma        | 267        | 100   | [82-85] |
| Cirrhosis                                  |  | Gamma        | 2861       | 1073  | [86]    |
| HCC                                        |  | Gamma        | 42644      | 15992 | [87,88] |
| CHD                                        |  | Gamma        | 13233      | 4962  | [89]    |
| T2D                                        |  | Gamma        | 8170       | 3064  | [90]    |
| Overweight                                 |  | Gamma        | 343        | 129   | [91]    |
| Obesity                                    |  | Gamma        | 916        | 344   | [91]    |
| <b>Disability weights</b>                  |  |              |            |       |         |
|                                            |  | Distribution | Mean value | Min   | Max     |
| NASH                                       |  | Beta         | 0.033      | 0.017 | 0.066   |
| Cirrhosis                                  |  | Beta         | 0.194      | 0.127 | 0.273   |
| HCC                                        |  | Beta         | 0.294      | 0.199 | 0.411   |
| CHD                                        |  | Beta         | 0.066      | 0.043 | 0.095   |
| T2D                                        |  | Beta         | 0.150      | 0.080 | 0.220   |
| Obesity                                    |  | Beta         | 0.012      | 0.001 | 0.022   |

SD: standard deviation, CHD: coronary heart disease, T2D: type 2 diabetes, NAFLD: non-alcoholic fatty liver disease (steatosis, NASH & cirrhosis), NASH: non-alcoholic steatohepatitis, HCC: hepatocellular carcinoma, Hisp: Hispanic, NHW: non-Hispanic white, NHB: non-Hispanic black, TP: transition probability, OR: odds ratio  
 \*1 See online supplement table 2. \*2 See online supplement table 3. \*3 See online supplement table 4. \*4 See online supplement table 5.  
 \*5 See online supplement table 6. \*6 See online supplement table 7. \*7 See online supplement table 8. \*8 See online supplement table 9.  
 \*9 See online supplement table 10. \*10 See online supplement table 11. \*11 See online supplement table 12. \*12 See online supplement table 13. \*13 See online supplement table 14. \*14 See online supplement table 15. \*15 See online supplement table 16.

Table 2. Age distribution.[1]

24  
25  
26  
27  
28  
29  
30  
31  
32  
33  
34  
35  
36  
37  
38  
39  
40  
41  
42  
43  
44  
45  
46  
47  
48  
49  
50  
51  
52  
53  
54  
55  
56  
57  
58  
59  
60

| Age | Percentage | Age | Percentage |
|-----|------------|-----|------------|
| 20  | 1.9194     | 55  | 1.7505     |
| 21  | 1.9194     | 56  | 1.7505     |
| 22  | 1.9194     | 57  | 1.7505     |
| 23  | 1.9194     | 58  | 1.7505     |
| 24  | 1.9194     | 59  | 1.7505     |
| 25  | 1.8701     | 60  | 1.5024     |
| 26  | 1.8701     | 61  | 1.5024     |
| 27  | 1.8701     | 62  | 1.5024     |
| 28  | 1.8701     | 63  | 1.5024     |
| 29  | 1.8701     | 64  | 1.5024     |
| 30  | 1.7749     | 65  | 1.1073     |
| 31  | 1.7749     | 66  | 1.1073     |
| 32  | 1.7749     | 67  | 1.1073     |
| 33  | 1.7749     | 68  | 1.1073     |
| 34  | 1.7749     | 69  | 1.1073     |
| 35  | 1.7757     | 70  | 0.8256     |
| 36  | 1.7757     | 71  | 0.8256     |
| 37  | 1.7757     | 72  | 0.8256     |
| 38  | 1.7757     | 73  | 0.8256     |
| 39  | 1.7757     | 74  | 0.8256     |
| 40  | 1.8487     | 75  | 0.6473     |
| 41  | 1.8487     | 76  | 0.6473     |
| 42  | 1.8487     | 77  | 0.6473     |
| 43  | 1.8487     | 78  | 0.6473     |
| 44  | 1.8487     | 79  | 0.6473     |
| 45  | 2.0018     | 80  | 0.5093     |
| 46  | 2.0018     | 81  | 0.5093     |
| 47  | 2.0018     | 82  | 0.5093     |
| 48  | 2.0018     | 83  | 0.5093     |
| 49  | 2.0018     | 84  | 0.5093     |
| 50  | 1.9767     | 85+ | 2.4517     |
| 51  | 1.9767     |     |            |
| 52  | 1.9767     |     |            |
| 53  | 1.9767     |     |            |
| 54  | 1.9767     |     |            |

1  
2  
3  
4  
5  
6  
7  
8  
9  
10  
11  
12  
13  
14  
15  
16  
17  
18  
19  
20  
21  
22  
23  
24  
25  
26  
27  
28  
29  
30  
31  
32  
33  
34  
35  
36  
37  
38  
39  
40  
41  
42  
43  
44  
45  
46  
47  
48  
49  
50  
51  
52  
53  
54  
55  
56  
57  
58  
59  
60

**Table 3.** Sex distribution.[1]

| Sex    | Percentage |
|--------|------------|
| Male   | 48.4388    |
| Female | 51.5612    |

**Table 4.** Ethnic distribution.[1]

| Age                | Percentage |
|--------------------|------------|
| Hispanic           | 14.0377    |
| Non-hispanic White | 74.3771    |
| Non-hispanic Black | 11.5852    |

**Table 5.** Non-alcoholic fatty liver disease prevalence percentage at start of simulation.[2-10]

| Ethnicity | Steatosis | NASH | Cirrhosis | Hepatocellular carcinoma |
|-----------|-----------|------|-----------|--------------------------|
| Hispanic  | 40.05     | 4.5  | 0.45      | 0.0363                   |
| NH-White  | 26.70     | 3.0  | 0.30      | 0.0242                   |
| NH-Black  | 21.36     | 2.4  | 0.24      | 0.0194                   |

Peer review only

**Table 6.** Coronary heart disease prevalence percentage at the start of the simulation.[11]

| Sex    | Ethnicity | Age   | Percentage with CHD |
|--------|-----------|-------|---------------------|
| Male   | Hispanic  | 20-35 | 0.00                |
| Male   | Hispanic  | 35-44 | 1.30                |
| Male   | Hispanic  | 45-54 | 3.90                |
| Male   | Hispanic  | 55-64 | 10.60               |
| Male   | Hispanic  | 65-74 | 19.20               |
| Male   | Hispanic  | 75-84 | 23.50               |
| Male   | Hispanic  | 85+   | 23.80               |
| Male   | NH-White  | 20-35 | 0.00                |
| Male   | NH-White  | 35-44 | 1.20                |
| Male   | NH-White  | 45-54 | 6.00                |
| Male   | NH-White  | 55-64 | 13.80               |
| Male   | NH-White  | 65-74 | 23.30               |
| Male   | NH-White  | 75-84 | 31.80               |
| Male   | NH-White  | 85+   | 38.60               |
| Male   | NH-Black  | 20-35 | 0.00                |
| Male   | NH-Black  | 35-44 | 1.70                |
| Male   | NH-Black  | 45-54 | 7.50                |
| Male   | NH-Black  | 55-64 | 14.20               |
| Male   | NH-Black  | 65-74 | 16.90               |
| Male   | NH-Black  | 75-84 | 22.10               |
| Male   | NH-Black  | 85+   | 18.80               |
| Female | Hispanic  | 20-35 | 0.00                |
| Female | Hispanic  | 35-44 | 1.20                |
| Female | Hispanic  | 45-54 | 3.00                |
| Female | Hispanic  | 55-64 | 6.70                |
| Female | Hispanic  | 65-74 | 16.20               |
| Female | Hispanic  | 75-84 | 20.30               |
| Female | Hispanic  | 85+   | 23.90               |
| Female | NH-White  | 20-35 | 0.00                |
| Female | NH-White  | 35-44 | 0.90                |
| Female | NH-White  | 45-54 | 3.30                |
| Female | NH-White  | 55-64 | 6.70                |
| Female | NH-White  | 65-74 | 11.20               |
| Female | NH-White  | 75-84 | 18.40               |
| Female | NH-White  | 85+   | 24.30               |
| Female | NH-Black  | 20-35 | 0.00                |
| Female | NH-Black  | 35-44 | 1.20                |
| Female | NH-Black  | 45-54 | 5.30                |
| Female | NH-Black  | 55-64 | 11.20               |
| Female | NH-Black  | 65-74 | 17.40               |
| Female | NH-Black  | 75-84 | 19.80               |
| Female | NH-Black  | 85+   | 21.80               |

**Table 7.** Type 2 diabetes prevalence percentage at the start of the simulation.[11]

| Sex    | Ethnicity | Age   | Percentage with T2D |
|--------|-----------|-------|---------------------|
| Male   | Hispanic  | 20-24 | 0.90                |
| Male   | Hispanic  | 25-44 | 3.50                |
| Male   | Hispanic  | 45-54 | 14.20               |
| Male   | Hispanic  | 55-64 | 25.80               |
| Male   | Hispanic  | 65-74 | 32.80               |
| Male   | Hispanic  | 75-84 | 31.30               |
| Male   | Hispanic  | 85+   | 23.80               |
| Male   | NH-White  | 20-24 | 0.90                |
| Male   | NH-White  | 25-44 | 2.40                |
| Male   | NH-White  | 45-54 | 8.20                |
| Male   | NH-White  | 55-64 | 14.70               |
| Male   | NH-White  | 65-74 | 20.10               |
| Male   | NH-White  | 75-84 | 20.50               |
| Male   | NH-White  | 85+   | 17.90               |
| Male   | NH-Black  | 20-24 | 1.00                |
| Male   | NH-Black  | 25-44 | 5.00                |
| Male   | NH-Black  | 45-54 | 15.00               |
| Male   | NH-Black  | 55-64 | 24.00               |
| Male   | NH-Black  | 65-74 | 26.50               |
| Male   | NH-Black  | 75-84 | 39.00               |
| Male   | NH-Black  | 85+   | 18.70               |
| Female | Hispanic  | 20-24 | 0.90                |
| Female | Hispanic  | 25-44 | 3.60                |
| Female | Hispanic  | 45-54 | 10.30               |
| Female | Hispanic  | 55-64 | 24.00               |
| Female | Hispanic  | 65-74 | 34.80               |
| Female | Hispanic  | 75-84 | 32.40               |
| Female | Hispanic  | 85+   | 22.80               |
| Female | NH-White  | 20-24 | 1.20                |
| Female | NH-White  | 25-44 | 2.80                |
| Female | NH-White  | 45-54 | 7.30                |
| Female | NH-White  | 55-64 | 12.10               |
| Female | NH-White  | 65-74 | 17.00               |
| Female | NH-White  | 75-84 | 17.10               |
| Female | NH-White  | 85+   | 12.10               |
| Female | NH-Black  | 20-24 | 1.00                |
| Female | NH-Black  | 25-44 | 5.20                |
| Female | NH-Black  | 45-54 | 10.90               |
| Female | NH-Black  | 55-64 | 24.10               |
| Female | NH-Black  | 65-74 | 32.60               |
| Female | NH-Black  | 75-84 | 31.60               |
| Female | NH-Black  | 85+   | 20.20               |

**Table 8.** Overweight and obesity prevalence percentages at the start of the simulation.[11]

| Sex    | Ethnicity | Age   | Overweight percentage | Obesity percentage |
|--------|-----------|-------|-----------------------|--------------------|
| Male   | Hispanic  | 20-44 | 39.5                  | 36.8               |
| Male   | Hispanic  | 45-64 | 43.8                  | 41.0               |
| Male   | Hispanic  | 65+   | 42.8                  | 44.7               |
| Male   | White     | 20-44 | 35.7                  | 31.6               |
| Male   | White     | 45-64 | 40.8                  | 39.0               |
| Male   | White     | 65+   | 42.5                  | 36.9               |
| Male   | Black     | 20-44 | 28.7                  | 36.9               |
| Male   | Black     | 45-64 | 34.3                  | 40.6               |
| Male   | Black     | 65+   | 37.0                  | 36.7               |
| Female | Hispanic  | 20-44 | 33.2                  | 36.8               |
| Female | Hispanic  | 45-64 | 32.9                  | 52.9               |
| Female | Hispanic  | 65+   | 33.0                  | 49.3               |
| Female | White     | 20-44 | 25.3                  | 28.0               |
| Female | White     | 45-64 | 32.6                  | 37.4               |
| Female | White     | 65+   | 29.5                  | 44.3               |
| Female | Black     | 20-44 | 22.3                  | 56.1               |
| Female | Black     | 45-64 | 27.1                  | 61.8               |
| Female | Black     | 65+   | 25.8                  | 53.7               |

**Table 9.** Added sugar consumption distributions.[12,13]

| Sex    | Ethnicity          | Consumption group      | % in low vs high risk group |
|--------|--------------------|------------------------|-----------------------------|
| Male   | Hispanic           | Low sugar consumption  | 36.40%                      |
| Male   | Hispanic           | High sugar consumption | 63.60%                      |
| Male   | Non-hispanic White | Low sugar consumption  | 36.40%                      |
| Male   | Non-hispanic White | High sugar consumption | 63.60%                      |
| Male   | Non-hispanic Black | Low sugar consumption  | 34.10%                      |
| Male   | Non-hispanic Black | High sugar consumption | 65.90%                      |
| Female | Hispanic           | Low sugar consumption  | 52.80%                      |
| Female | Hispanic           | High sugar consumption | 47.20%                      |
| Female | Non-hispanic White | Low sugar consumption  | 49.30%                      |
| Female | Non-hispanic White | High sugar consumption | 50.70%                      |
| Female | Non-hispanic Black | Low sugar consumption  | 41.70%                      |
| Female | Non-hispanic Black | High sugar consumption | 58.30%                      |

**Table 10.** Hepatocellular carcinoma incidence rate from NASH.[14-25]

| Age               | Incidence rate |
|-------------------|----------------|
| 40 to 44 years    | 3.64216E-05    |
| 45 to 49 years    | 4.64842E-05    |
| 50 to 54 years    | 5.93269E-05    |
| 55 to 59 years    | 7.57179E-05    |
| 60 to 64 years    | 9.66373E-05    |
| 65 to 69 years    | 0.000123336    |
| 70 to 74 years    | 0.000157412    |
| 75 to 79 years    | 0.000200902    |
| 80 years and over | 0.000256408    |

**Table 11.** Hepatocellular carcinoma incidence rate from cirrhosis.[14-25]

| Age               | Incidence rate |
|-------------------|----------------|
| 40 to 44 years    | 0.008844339    |
| 45 to 49 years    | 0.011287867    |
| 50 to 54 years    | 0.014406497    |
| 55 to 59 years    | 0.018386746    |
| 60 to 64 years    | 0.023466665    |
| 65 to 69 years    | 0.029950073    |
| 70 to 74 years    | 0.038224725    |
| 75 to 79 years    | 0.048785512    |
| 80 years and over | 0.062264050    |

Table 12. Coronary heart disease incidence rate (in %).[30,31]

| Year | <35 | 35-39  | 40-44  | 45-49  | 50-54  | 55-59  | 60-64  | 65-69  | 70-74  | 75-79  | 80-84  | 85+    |
|------|-----|--------|--------|--------|--------|--------|--------|--------|--------|--------|--------|--------|
| 2010 | 0.0 | 0.0516 | 0.0516 | 0.2007 | 0.2007 | 0.3519 | 0.3519 | 0.5869 | 0.5869 | 1.4447 | 1.4447 | 3.0621 |
| 2011 | 0.0 | 0.0508 | 0.0508 | 0.1976 | 0.1976 | 0.3466 | 0.3466 | 0.5781 | 0.5781 | 1.4230 | 1.4230 | 3.0162 |
| 2012 | 0.0 | 0.0501 | 0.0501 | 0.1947 | 0.1947 | 0.3414 | 0.3414 | 0.5694 | 0.5694 | 1.4017 | 1.4017 | 2.9709 |
| 2013 | 0.0 | 0.0493 | 0.0493 | 0.1918 | 0.1918 | 0.3363 | 0.3363 | 0.5609 | 0.5609 | 1.3806 | 1.3806 | 2.9263 |
| 2014 | 0.0 | 0.0486 | 0.0486 | 0.1889 | 0.1889 | 0.3312 | 0.3312 | 0.5525 | 0.5525 | 1.3599 | 1.3599 | 2.8825 |
| 2015 | 0.0 | 0.0478 | 0.0478 | 0.1860 | 0.1860 | 0.3262 | 0.3262 | 0.5442 | 0.5442 | 1.3395 | 1.3395 | 2.8392 |
| 2016 | 0.0 | 0.0471 | 0.0471 | 0.1833 | 0.1833 | 0.3214 | 0.3214 | 0.5360 | 0.5360 | 1.3194 | 1.3194 | 2.7966 |
| 2017 | 0.0 | 0.0464 | 0.0464 | 0.1805 | 0.1805 | 0.3165 | 0.3165 | 0.5280 | 0.5280 | 1.2997 | 1.2997 | 2.7547 |
| 2018 | 0.0 | 0.0457 | 0.0457 | 0.1778 | 0.1778 | 0.3118 | 0.3118 | 0.5201 | 0.5201 | 1.2802 | 1.2802 | 2.7134 |
| 2019 | 0.0 | 0.0450 | 0.0450 | 0.1751 | 0.1751 | 0.3071 | 0.3071 | 0.5123 | 0.5123 | 1.2610 | 1.2610 | 2.6727 |
| 2020 | 0.0 | 0.0444 | 0.0444 | 0.1725 | 0.1725 | 0.3025 | 0.3025 | 0.5046 | 0.5046 | 1.2420 | 1.2420 | 2.6326 |
| 2021 | 0.0 | 0.0437 | 0.0437 | 0.1699 | 0.1699 | 0.2980 | 0.2980 | 0.4970 | 0.4970 | 1.2234 | 1.2234 | 2.5931 |
| 2022 | 0.0 | 0.0430 | 0.0430 | 0.1674 | 0.1674 | 0.2935 | 0.2935 | 0.4896 | 0.4896 | 1.2051 | 1.2051 | 2.5542 |
| 2023 | 0.0 | 0.0424 | 0.0424 | 0.1649 | 0.1649 | 0.2891 | 0.2891 | 0.4822 | 0.4822 | 1.1870 | 1.1870 | 2.5159 |
| 2024 | 0.0 | 0.0418 | 0.0418 | 0.1624 | 0.1624 | 0.2848 | 0.2848 | 0.4750 | 0.4750 | 1.1692 | 1.1692 | 2.4781 |
| 2025 | 0.0 | 0.0411 | 0.0411 | 0.1600 | 0.1600 | 0.2805 | 0.2805 | 0.4679 | 0.4679 | 1.1516 | 1.1516 | 2.4410 |
| 2026 | 0.0 | 0.0405 | 0.0405 | 0.1576 | 0.1576 | 0.2763 | 0.2763 | 0.4608 | 0.4608 | 1.1344 | 1.1344 | 2.4043 |
| 2027 | 0.0 | 0.0399 | 0.0399 | 0.1552 | 0.1552 | 0.2721 | 0.2721 | 0.4539 | 0.4539 | 1.1174 | 1.1174 | 2.3683 |
| 2028 | 0.0 | 0.0393 | 0.0393 | 0.1529 | 0.1529 | 0.2681 | 0.2681 | 0.4471 | 0.4471 | 1.1006 | 1.1006 | 2.3328 |
| 2029 | 0.0 | 0.0387 | 0.0387 | 0.1506 | 0.1506 | 0.2640 | 0.2640 | 0.4404 | 0.4404 | 1.0841 | 1.0841 | 2.2978 |
| 2030 | 0.0 | 0.0381 | 0.0381 | 0.1483 | 0.1483 | 0.2601 | 0.2601 | 0.4338 | 0.4338 | 1.0678 | 1.0678 | 2.2633 |
| 2031 | 0.0 | 0.0376 | 0.0376 | 0.1461 | 0.1461 | 0.2562 | 0.2562 | 0.4273 | 0.4273 | 1.0518 | 1.0518 | 2.2293 |
| 2032 | 0.0 | 0.0370 | 0.0370 | 0.1439 | 0.1439 | 0.2523 | 0.2523 | 0.4209 | 0.4209 | 1.0360 | 1.0360 | 2.1959 |
| 2033 | 0.0 | 0.0364 | 0.0364 | 0.1417 | 0.1417 | 0.2485 | 0.2485 | 0.4146 | 0.4146 | 1.0205 | 1.0205 | 2.1630 |
| 2034 | 0.0 | 0.0359 | 0.0359 | 0.1396 | 0.1396 | 0.2448 | 0.2448 | 0.4084 | 0.4084 | 1.0052 | 1.0052 | 2.1305 |
| 2035 | 0.0 | 0.0354 | 0.0354 | 0.1375 | 0.1375 | 0.2411 | 0.2411 | 0.4022 | 0.4022 | 0.9901 | 0.9901 | 2.0986 |

Table 13. Coronary heart disease mortality rate (in %).[30-32]

| Year | <35    | 35-39  | 40-44  | 45-49  | 50-54  | 55-59  | 60-64  | 65-69  | 70-74  | 75-79  | 80-84  | 85+    |
|------|--------|--------|--------|--------|--------|--------|--------|--------|--------|--------|--------|--------|
| 2010 | 0.0000 | 0.5067 | 0.8506 | 0.9493 | 1.3778 | 1.4767 | 1.4179 | 1.1071 | 2.1109 | 2.2865 | 3.9970 | 9.4859 |
| 2011 | 0.0000 | 0.4960 | 0.8327 | 0.9293 | 1.3489 | 1.4457 | 1.3881 | 1.0839 | 2.0665 | 2.2385 | 3.9130 | 9.2867 |
| 2012 | 0.0000 | 0.4856 | 0.8152 | 0.9098 | 1.3205 | 1.4153 | 1.3590 | 1.0611 | 2.0231 | 2.1914 | 3.8309 | 9.0917 |
| 2013 | 0.0000 | 0.4754 | 0.7981 | 0.8907 | 1.2928 | 1.3856 | 1.3304 | 1.0388 | 1.9807 | 2.1454 | 3.7504 | 8.9007 |
| 2014 | 0.0000 | 0.4654 | 0.7813 | 0.8720 | 1.2657 | 1.3565 | 1.3025 | 1.0170 | 1.9391 | 2.1004 | 3.6717 | 8.7138 |
| 2015 | 0.0000 | 0.4557 | 0.7649 | 0.8537 | 1.2391 | 1.3280 | 1.2751 | 0.9956 | 1.8983 | 2.0563 | 3.5946 | 8.5308 |
| 2016 | 0.0000 | 0.4461 | 0.7489 | 0.8358 | 1.2131 | 1.3002 | 1.2484 | 0.9747 | 1.8585 | 2.0131 | 3.5191 | 8.3517 |
| 2017 | 0.0000 | 0.4367 | 0.7331 | 0.8182 | 1.1876 | 1.2728 | 1.2221 | 0.9543 | 1.8195 | 1.9708 | 3.4452 | 8.1763 |
| 2018 | 0.0000 | 0.4275 | 0.7177 | 0.8010 | 1.1626 | 1.2461 | 1.1965 | 0.9342 | 1.7812 | 1.9294 | 3.3728 | 8.0046 |
| 2019 | 0.0000 | 0.4186 | 0.7027 | 0.7842 | 1.1382 | 1.2199 | 1.1714 | 0.9146 | 1.7438 | 1.8889 | 3.3020 | 7.8365 |
| 2020 | 0.0000 | 0.4098 | 0.6879 | 0.7677 | 1.1143 | 1.1943 | 1.1468 | 0.8954 | 1.7072 | 1.8492 | 3.2326 | 7.6719 |
| 2021 | 0.0000 | 0.4012 | 0.6735 | 0.7516 | 1.0909 | 1.1692 | 1.1227 | 0.8766 | 1.6714 | 1.8104 | 3.1648 | 7.5108 |
| 2022 | 0.0000 | 0.3927 | 0.6593 | 0.7358 | 1.0680 | 1.1447 | 1.0991 | 0.8582 | 1.6363 | 1.7724 | 3.0983 | 7.3531 |
| 2023 | 0.0000 | 0.3845 | 0.6455 | 0.7204 | 1.0456 | 1.1207 | 1.0760 | 0.8402 | 1.6019 | 1.7352 | 3.0332 | 7.1987 |
| 2024 | 0.0000 | 0.3764 | 0.6319 | 0.7053 | 1.0236 | 1.0971 | 1.0534 | 0.8225 | 1.5683 | 1.6987 | 2.9695 | 7.0475 |
| 2025 | 0.0000 | 0.3685 | 0.6187 | 0.6905 | 1.0021 | 1.0741 | 1.0313 | 0.8052 | 1.5353 | 1.6631 | 2.9072 | 6.8995 |
| 2026 | 0.0000 | 0.3608 | 0.6057 | 0.6760 | 0.9811 | 1.0515 | 1.0096 | 0.7883 | 1.5031 | 1.6281 | 2.8461 | 6.7546 |
| 2027 | 0.0000 | 0.3532 | 0.5929 | 0.6618 | 0.9605 | 1.0294 | 0.9884 | 0.7718 | 1.4715 | 1.5939 | 2.7864 | 6.6128 |
| 2028 | 0.0000 | 0.3458 | 0.5805 | 0.6479 | 0.9403 | 1.0078 | 0.9677 | 0.7556 | 1.4406 | 1.5605 | 2.7278 | 6.4739 |
| 2029 | 0.0000 | 0.3385 | 0.5683 | 0.6343 | 0.9206 | 0.9867 | 0.9474 | 0.7397 | 1.4104 | 1.5277 | 2.6706 | 6.3380 |
| 2030 | 0.0000 | 0.3314 | 0.5564 | 0.6209 | 0.9012 | 0.9659 | 0.9275 | 0.7242 | 1.3808 | 1.4956 | 2.6145 | 6.2049 |
| 2031 | 0.0000 | 0.3245 | 0.5447 | 0.6079 | 0.8823 | 0.9457 | 0.9080 | 0.7090 | 1.3518 | 1.4642 | 2.5596 | 6.0746 |
| 2032 | 0.0000 | 0.3176 | 0.5332 | 0.5951 | 0.8638 | 0.9258 | 0.8889 | 0.6941 | 1.3234 | 1.4335 | 2.5058 | 5.9470 |
| 2033 | 0.0000 | 0.3110 | 0.5220 | 0.5826 | 0.8456 | 0.9064 | 0.8703 | 0.6795 | 1.2956 | 1.4034 | 2.4532 | 5.8221 |
| 2034 | 0.0000 | 0.3044 | 0.5111 | 0.5704 | 0.8279 | 0.8873 | 0.8520 | 0.6652 | 1.2684 | 1.3739 | 2.4017 | 5.6998 |
| 2035 | 0.0000 | 0.2981 | 0.5004 | 0.5584 | 0.8105 | 0.8687 | 0.8341 | 0.6513 | 1.2417 | 1.3450 | 2.3513 | 5.5801 |

Table 14. Type 2 diabetes incidence rate.[33,34]

| Age   | Incidence rate |
|-------|----------------|
| 20-24 | 0.000447       |
| 25-29 | 0.000762       |
| 30-34 | 0.001090       |
| 35-39 | 0.001625       |
| 40-44 | 0.002880       |
| 45-49 | 0.003575       |
| 50-54 | 0.004957       |
| 55-59 | 0.005071       |
| 60-64 | 0.004662       |
| 65-69 | 0.004450       |
| 70-74 | 0.003925       |
| 75-79 | 0.003609       |
| 80+   | 0.003240       |

Table 15. Type 2 diabetes mortality rate.[32-34]

| Age   | Mortality rate |
|-------|----------------|
| 20-24 | 0.006177       |
| 25-29 | 0.009399       |
| 30-34 | 0.009399       |
| 35-39 | 0.009399       |
| 40-44 | 0.009399       |
| 45-49 | 0.013706       |
| 50-54 | 0.013706       |
| 55-59 | 0.020137       |
| 60-64 | 0.020137       |
| 65-69 | 0.031904       |
| 70-74 | 0.031904       |
| 75-79 | 0.068313       |
| 80+   | 0.068313       |

Table 16. Non-disease related mortality rate (in %).[32]

| Year | 20-24 | 25-29 | 30-34 | 35-39 | 40-44 | 45-49 | 50-54 | 55-59 | 60-64 | 65-69 | 70-74 | 75-79 | 80-84 | 85+    |
|------|-------|-------|-------|-------|-------|-------|-------|-------|-------|-------|-------|-------|-------|--------|
| 2010 | 0.086 | 0.093 | 0.105 | 0.128 | 0.178 | 0.275 | 0.411 | 0.583 | 0.822 | 1.242 | 1.909 | 3.038 | 4.952 | 11.162 |
| 2011 | 0.086 | 0.093 | 0.105 | 0.125 | 0.174 | 0.269 | 0.403 | 0.571 | 0.797 | 1.205 | 1.851 | 2.947 | 4.804 | 10.828 |
| 2012 | 0.086 | 0.093 | 0.105 | 0.123 | 0.171 | 0.264 | 0.395 | 0.560 | 0.773 | 1.169 | 1.796 | 2.859 | 4.660 | 10.503 |
| 2013 | 0.086 | 0.093 | 0.105 | 0.120 | 0.167 | 0.259 | 0.387 | 0.548 | 0.750 | 1.133 | 1.742 | 2.773 | 4.520 | 10.188 |
| 2014 | 0.086 | 0.093 | 0.105 | 0.118 | 0.164 | 0.253 | 0.379 | 0.537 | 0.728 | 1.099 | 1.690 | 2.690 | 4.384 | 9.882  |
| 2015 | 0.086 | 0.093 | 0.105 | 0.115 | 0.161 | 0.248 | 0.372 | 0.527 | 0.706 | 1.066 | 1.639 | 2.609 | 4.253 | 9.586  |
| 2016 | 0.086 | 0.093 | 0.105 | 0.113 | 0.158 | 0.243 | 0.364 | 0.516 | 0.685 | 1.034 | 1.590 | 2.531 | 4.125 | 9.298  |
| 2017 | 0.086 | 0.093 | 0.105 | 0.111 | 0.154 | 0.239 | 0.357 | 0.506 | 0.664 | 1.003 | 1.542 | 2.455 | 4.002 | 9.019  |
| 2018 | 0.086 | 0.093 | 0.105 | 0.109 | 0.151 | 0.234 | 0.350 | 0.496 | 0.644 | 0.973 | 1.496 | 2.381 | 3.881 | 8.749  |
| 2019 | 0.086 | 0.093 | 0.105 | 0.106 | 0.148 | 0.229 | 0.343 | 0.486 | 0.625 | 0.944 | 1.451 | 2.310 | 3.765 | 8.486  |
| 2020 | 0.086 | 0.093 | 0.105 | 0.104 | 0.145 | 0.225 | 0.336 | 0.476 | 0.606 | 0.916 | 1.408 | 2.241 | 3.652 | 8.231  |
| 2021 | 0.086 | 0.093 | 0.105 | 0.102 | 0.142 | 0.220 | 0.329 | 0.467 | 0.588 | 0.888 | 1.365 | 2.173 | 3.543 | 7.985  |
| 2022 | 0.086 | 0.093 | 0.105 | 0.100 | 0.140 | 0.216 | 0.323 | 0.457 | 0.570 | 0.862 | 1.324 | 2.108 | 3.436 | 7.745  |
| 2023 | 0.086 | 0.093 | 0.105 | 0.098 | 0.137 | 0.211 | 0.316 | 0.448 | 0.553 | 0.836 | 1.285 | 2.045 | 3.333 | 7.513  |
| 2024 | 0.086 | 0.093 | 0.105 | 0.096 | 0.134 | 0.207 | 0.310 | 0.439 | 0.537 | 0.811 | 1.246 | 1.984 | 3.233 | 7.287  |
| 2025 | 0.086 | 0.093 | 0.105 | 0.094 | 0.131 | 0.203 | 0.304 | 0.430 | 0.521 | 0.786 | 1.209 | 1.924 | 3.136 | 7.069  |
| 2026 | 0.086 | 0.093 | 0.105 | 0.092 | 0.129 | 0.199 | 0.298 | 0.422 | 0.505 | 0.763 | 1.172 | 1.866 | 3.042 | 6.857  |
| 2027 | 0.086 | 0.093 | 0.105 | 0.090 | 0.126 | 0.195 | 0.292 | 0.413 | 0.490 | 0.740 | 1.137 | 1.810 | 2.951 | 6.651  |
| 2028 | 0.086 | 0.093 | 0.105 | 0.089 | 0.124 | 0.191 | 0.286 | 0.405 | 0.475 | 0.718 | 1.103 | 1.756 | 2.862 | 6.451  |
| 2029 | 0.086 | 0.093 | 0.105 | 0.087 | 0.121 | 0.187 | 0.280 | 0.397 | 0.461 | 0.696 | 1.070 | 1.703 | 2.776 | 6.258  |
| 2030 | 0.086 | 0.093 | 0.105 | 0.085 | 0.119 | 0.183 | 0.275 | 0.389 | 0.447 | 0.675 | 1.038 | 1.652 | 2.693 | 6.070  |
| 2031 | 0.086 | 0.093 | 0.105 | 0.083 | 0.116 | 0.180 | 0.269 | 0.381 | 0.434 | 0.655 | 1.007 | 1.603 | 2.612 | 5.888  |
| 2032 | 0.086 | 0.093 | 0.105 | 0.082 | 0.114 | 0.176 | 0.264 | 0.374 | 0.421 | 0.635 | 0.977 | 1.555 | 2.534 | 5.711  |
| 2033 | 0.086 | 0.093 | 0.105 | 0.080 | 0.112 | 0.173 | 0.258 | 0.366 | 0.408 | 0.616 | 0.947 | 1.508 | 2.458 | 5.540  |
| 2034 | 0.086 | 0.093 | 0.105 | 0.079 | 0.110 | 0.169 | 0.253 | 0.359 | 0.396 | 0.598 | 0.919 | 1.463 | 2.384 | 5.374  |
| 2035 | 0.086 | 0.093 | 0.105 | 0.077 | 0.107 | 0.166 | 0.248 | 0.352 | 0.384 | 0.580 | 0.891 | 1.419 | 2.313 | 5.213  |

Table 17. IHME health-adjusted life expectancy and discounted life expectancy for females. [94,95]

| Age of death | WHO HALE | Discounted by 3% | Age of death | WHO HALE | Discounted by 3% |
|--------------|----------|------------------|--------------|----------|------------------|
| 20           | 51.138   | 25.981           | 66           | 15.167   | 12.042           |
| 21           | 51.138   | 25.981           | 67           | 15.167   | 12.042           |
| 22           | 51.138   | 25.981           | 68           | 15.167   | 12.042           |
| 23           | 51.138   | 25.981           | 69           | 15.167   | 12.042           |
| 24           | 51.138   | 25.981           | 70           | 12.020   | 9.968            |
| 25           | 46.766   | 24.966           | 71           | 12.020   | 9.968            |
| 26           | 46.766   | 24.966           | 72           | 12.020   | 9.968            |
| 27           | 46.766   | 24.966           | 73           | 12.020   | 9.968            |
| 28           | 46.766   | 24.966           | 74           | 12.020   | 9.968            |
| 29           | 46.766   | 24.966           | 75           | 9.169    | 7.912            |
| 30           | 42.466   | 23.832           | 76           | 9.169    | 7.912            |
| 31           | 42.466   | 23.832           | 77           | 9.169    | 7.912            |
| 32           | 42.466   | 23.832           | 78           | 9.169    | 7.912            |
| 33           | 42.466   | 23.832           | 79           | 9.169    | 7.912            |
| 34           | 42.466   | 23.832           | 80           | 6.646    | 5.942            |
| 35           | 38.214   | 22.560           | 81           | 6.646    | 5.942            |
| 36           | 38.214   | 22.560           | 82           | 6.646    | 5.942            |
| 37           | 38.214   | 22.560           | 83           | 6.646    | 5.942            |
| 38           | 38.214   | 22.560           | 84           | 6.646    | 5.942            |
| 39           | 38.214   | 22.560           | 85           | 4.512    | 4.159            |
| 40           | 34.033   | 21.144           | 86           | 4.512    | 4.159            |
| 41           | 34.033   | 21.144           | 87           | 4.512    | 4.159            |
| 42           | 34.033   | 21.144           | 88           | 4.512    | 4.159            |
| 43           | 34.033   | 21.144           | 89           | 4.512    | 4.159            |
| 44           | 34.033   | 21.144           | 90           | 2.915    | 2.751            |
| 45           | 29.960   | 19.584           | 91           | 2.915    | 2.751            |
| 46           | 29.960   | 19.584           | 92           | 2.915    | 2.751            |
| 47           | 29.960   | 19.584           | 93           | 2.915    | 2.751            |
| 48           | 29.960   | 19.584           | 94           | 2.915    | 2.751            |
| 49           | 29.960   | 19.584           | 95           | 1.868    | 1.789            |
| 50           | 26.017   | 17.884           | 96           | 1.868    | 1.789            |
| 51           | 26.017   | 17.884           | 97           | 1.868    | 1.789            |
| 52           | 26.017   | 17.884           | 98           | 1.868    | 1.789            |
| 53           | 26.017   | 17.884           | 99           | 1.868    | 1.789            |
| 54           | 26.017   | 17.884           | 100          | 1.231    | 1.189            |
| 55           | 22.214   | 16.045           | 101          | 1.231    | 1.189            |
| 56           | 22.214   | 16.045           | 102          | 1.231    | 1.189            |
| 57           | 22.214   | 16.045           | 103          | 1.231    | 1.189            |
| 58           | 22.214   | 16.045           | 104          | 1.231    | 1.189            |
| 59           | 22.214   | 16.045           | 105          | 1.000    | 0.971            |
| 60           | 18.574   | 14.081           | 106          | 1.000    | 0.971            |
| 61           | 18.574   | 14.081           | 107          | 1.000    | 0.971            |
| 62           | 18.574   | 14.081           | 108          | 1.000    | 0.971            |
| 63           | 18.574   | 14.081           | 109          | 1.000    | 0.971            |
| 64           | 18.574   | 14.081           | 110          | 1.000    | 0.971            |
| 65           | 15.167   | 12.042           |              |          |                  |

Table 18. IHME health-adjusted life expectancy and discounted life expectancy for males.[94,95]

| Age of death | WHO HALE | Discounted by 3% | Age of death | WHO HALE | Discounted by 3% |
|--------------|----------|------------------|--------------|----------|------------------|
| 20           | 48.035   | 25.275           | 66           | 13.080   | 10.688           |
| 21           | 48.035   | 25.275           | 67           | 13.080   | 10.688           |
| 22           | 48.035   | 25.275           | 68           | 13.080   | 10.688           |
| 23           | 48.035   | 25.275           | 69           | 13.080   | 10.688           |
| 24           | 48.035   | 25.275           | 70           | 10.208   | 8.680            |
| 25           | 43.802   | 24.200           | 71           | 10.208   | 8.680            |
| 26           | 43.802   | 24.200           | 72           | 10.208   | 8.680            |
| 27           | 43.802   | 24.200           | 73           | 10.208   | 8.680            |
| 28           | 43.802   | 24.200           | 74           | 10.208   | 8.680            |
| 29           | 43.802   | 24.200           | 75           | 7.680    | 6.767            |
| 30           | 39.589   | 22.989           | 76           | 7.680    | 6.767            |
| 31           | 39.589   | 22.989           | 77           | 7.680    | 6.767            |
| 32           | 39.589   | 22.989           | 78           | 7.680    | 6.767            |
| 33           | 39.589   | 22.989           | 79           | 7.680    | 6.767            |
| 34           | 39.589   | 22.989           | 80           | 5.524    | 5.019            |
| 35           | 35.374   | 21.616           | 81           | 5.524    | 5.019            |
| 36           | 35.374   | 21.616           | 82           | 5.524    | 5.019            |
| 37           | 35.374   | 21.616           | 83           | 5.524    | 5.019            |
| 38           | 35.374   | 21.616           | 84           | 5.524    | 5.019            |
| 39           | 35.374   | 21.616           | 85           | 3.723    | 3.471            |
| 40           | 31.217   | 20.085           | 86           | 3.723    | 3.471            |
| 41           | 31.217   | 20.085           | 87           | 3.723    | 3.471            |
| 42           | 31.217   | 20.085           | 88           | 3.723    | 3.471            |
| 43           | 31.217   | 20.085           | 89           | 3.723    | 3.471            |
| 44           | 31.217   | 20.085           | 90           | 2.388    | 2.269            |
| 45           | 27.195   | 18.412           | 91           | 2.388    | 2.269            |
| 46           | 27.195   | 18.412           | 92           | 2.388    | 2.269            |
| 47           | 27.195   | 18.412           | 93           | 2.388    | 2.269            |
| 48           | 27.195   | 18.412           | 94           | 2.388    | 2.269            |
| 49           | 27.195   | 18.412           | 95           | 1.521    | 1.462            |
| 50           | 23.347   | 16.614           | 96           | 1.521    | 1.462            |
| 51           | 23.347   | 16.614           | 97           | 1.521    | 1.462            |
| 52           | 23.347   | 16.614           | 98           | 1.521    | 1.462            |
| 53           | 23.347   | 16.614           | 99           | 1.521    | 1.462            |
| 54           | 23.347   | 16.614           | 100          | 1.000    | 0.971            |
| 55           | 19.705   | 14.714           | 101          | 1.000    | 0.971            |
| 56           | 19.705   | 14.714           | 102          | 1.000    | 0.971            |
| 57           | 19.705   | 14.714           | 103          | 1.000    | 0.971            |
| 58           | 19.705   | 14.714           | 104          | 1.000    | 0.971            |
| 59           | 19.705   | 14.714           | 105          | 1.000    | 0.971            |
| 60           | 16.256   | 12.716           | 106          | 1.000    | 0.971            |
| 61           | 16.256   | 12.716           | 107          | 1.000    | 0.971            |
| 62           | 16.256   | 12.716           | 108          | 1.000    | 0.971            |
| 63           | 16.256   | 12.716           | 109          | 1.000    | 0.971            |
| 64           | 16.256   | 12.716           | 110          | 1.000    | 0.971            |
| 65           | 13.080   | 10.688           |              |          |                  |

## References

1. U.S. Census Bureau, Population Division. Population Estimates. Accessed on <http://www.census.gov/popest/index.html> at Apr 23, 2015.
2. Browning JD, Szczepaniak LS, Dobbins R, Nuremberg P, Horton JD, Cohen JC, et al. Prevalence of hepatic steatosis in an urban population in the United States: impact of ethnicity. *Hepatology*. 2004 Dec;40(6):1387-95.
3. Mahady SE, George J. Management of nonalcoholic steatohepatitis: an evidence-based approach. *Clin Liver Dis*. 2012 Aug;16(3):631-45. doi: 10.1016/j.cld.2012.05.003.
4. Williams CD, Stengel J, Asike MI, Torres DM, Shaw J, Contreras M, et al. Prevalence of non-alcoholic fatty liver disease and nonalcoholic steatohepatitis among a largely middle-aged population utilizing ultrasound and liver biopsy: a prospective study. *Gastroenterology*. 2011 Jan;140(1):124-31. doi: 10.1053/j.gastro.2010.09.038.
5. Chalasani N(1), Younossi Z, Lavine JE, Diehl AM, Brunt EM, Cusi K, et al. The diagnosis and management of non-alcoholic fatty liver disease: practice guideline by the American Gastroenterological Association, American Association for the Study of Liver Diseases, and American College of Gastroenterology. *Gastroenterology*. 2012 Jun;142(7):1592-609. doi: 10.1053/j.gastro.2012.04.001.
6. Adams LA, Lymp JF, St Sauver J, Sanderson SO, Lindor KD, Feldstein A, et al. The natural history of nonalcoholic fatty liver disease: a population-based cohort study. *Gastroenterology*. 2005 Jul;129(1):113-21.
7. Ascha MS, Hanouneh IA, Lopez R, Tamimi TA, Feldstein AF, Zein NN. The incidence and risk factors of hepatocellular carcinoma in patients with nonalcoholic steatohepatitis. *Hepatology*. 2010 Jun;51(6):1972-8. doi: 10.1002/hep.23527.
8. Bambha K, Belt P, Abraham M, Wilson LA, Pabst M, Ferrell L, et al. Nonalcoholic Steatohepatitis Clinical Research Network Research Group. Ethnicity and nonalcoholic fatty liver disease. *Hepatology*. 2012 Mar;55(3):769-80. doi: 10.1002/hep.24726.
9. Michelotti GA, Machado MV, Diehl AM. NAFLD, NASH and liver cancer. *Nat Rev Gastroenterol Hepatol*. 2013 Nov;10(11):656-65. doi: 10.1038/nrgastro.2013.183.
10. Page JM, Harrison SA. NASH and HCC. *Clin Liver Dis*. 2009 Nov;13(4):631-47. doi: 10.1016/j.cld.2009.07.007.
11. Centers for Disease Control and Prevention. National Center for Health Statistics. Health Data Interactive. Accessed at [www.cdc.gov/nchs/hdi.htm](http://www.cdc.gov/nchs/hdi.htm) on Apr 23, 2015.
12. Centers for Disease Control and Prevention. National Center for Health Statistics. National Health and Nutrition Examination Survey Data. Hyattsville, MD: U.S. Department of Health and Human Services, Centers for Disease Control and Prevention. 2005-2012. <http://www.cdc.gov/nchs/nhanes.htm>.
13. Rodríguez LA, Madsen KA, Auinger P, Bremer AA, Lustig RH. Added sugar intake and metabolic syndrome risk in US adolescents: cross-sectional analysis of NHANES 2005-2012. *Journal for Public Health Nutrition*. 2015. [Currently under review].
14. Anstee QM, Targher G, Day CP. Progression of NAFLD to diabetes mellitus, cardiovascular disease or cirrhosis. *Nat Rev Gastroenterol Hepatol*. 2013 Jun;10(6):330-44. doi: 10.1038/nrgastro.2013.41.
15. Bruno S, Maisonneuve P, Castellana P, Rotmensz N, Rossi S, Maggioni M, et al. Incidence and risk factors for non-alcoholic steatohepatitis: prospective study of 5408 women enrolled in Italian tamoxifen chemoprevention trial. *BMJ*. 2005 Apr 23;330(7497):932.
16. Ekstedt M, Franzén LE, Mathiesen UL, Thorelius L, Holmqvist M, Bodemar G, et al. Long-term follow-up of patients with NAFLD and elevated liver enzymes. *Hepatology*. 2006 Oct;44(4):865-73.
17. Haukeland JW, Lorgen I, Schreiner LT, Frigstad SO, Brandsaeter B, Bjørø K, et al. Incidence rates and causes of cirrhosis in a Norwegian population. *Scand J Gastroenterol*. 2007 Dec;42(12):1501-8.
18. Musso G, Cassader M, Bo S, De Michieli F, Gambino R. Sterol regulatory element-binding factor 2 (SREBF-2) predicts 7-year NAFLD incidence and severity of liverdisease and lipoprotein and glucose dysmetabolism. *Diabetes*. 2013 Apr;62(4):1109-20. doi: 10.2337/db12-0858.
19. Omagari K, Kadokawa Y, Masuda J, Egawa I, Sawa T, Hazama H, et al. Fatty liver in non-alcoholic non-overweight Japanese adults: incidence and clinical characteristics. *J Gastroenterol Hepatol*. 2002 Oct;17(10):1098-105.
20. Rafiq N, Bai C, Fang Y, Srishord M, McCullough A, Gramlich T, et al. Long-term follow-up of patients with nonalcoholic fatty liver. *Clin Gastroenterol Hepatol*. 2009 Feb;7(2):234-8. doi: 10.1016/j.cgh.2008.11.005.
21. Wong VW, Wong GL, Yeung DK, Lau TK, Chan CK, Chim AM, et al. Incidence of non-alcoholic fatty liver disease in Hong Kong: a population study with paired proton-magnetic resonance spectroscopy. *J Hepatol*. 2015 Jan;62(1):182-9. doi: 10.1016/j.jhep.2014.08.041.
22. Zelber-Sagi S1, Lotan R, Shlomai A, Webb M, Harrari G, Buch A, et al. Predictors for incidence and remission of NAFLD in the general population during a seven-year prospective follow-up. *J Hepatol*. 2012 May;56(5):1145-51. doi: 10.1016/j.jhep.2011.12.011.
23. Kawamura Y, Arase Y, Ikeda K, Seko Y, Imai N, Hosaka T, et al. Large-scale long-term follow-up study of Japanese patients with non-alcoholic Fatty liver disease for the onset of hepatocellular carcinoma. *Am J Gastroenterol*. 2012 Feb;107(2):253-61. doi: 10.1038/ajg.2011.327.
24. Njei B, Rotman Y, Ditah I, Lim JK. Emerging trends in hepatocellular carcinoma incidence and mortality. *Hepatology*. 2015 Jan;61(1):191-9. doi: 10.1002/hep.27388.
25. El-Serag HB, Mason AC. Rising incidence of hepatocellular carcinoma in the United States. *N Engl J Med*. 1999 Mar 11;340(10):745-50.
26. Lazo M, Hernaiz R, Bonekamp S, Kamel IR, Brancati FL, Guallar E, et al. Non-alcoholic fatty liver disease and mortality among US adults: prospective cohort study. *BMJ*. 2011 Nov 18;343:d6891. doi: 10.1136/bmj.d6891.
27. Stepanova M, Rafiq N, Makhlof H, Agrawal R, Kaur I, Younoszai Z, et al. Predictors of all-cause mortality and liver-related mortality in patients with non-alcoholic fatty liver disease (NAFLD). *Dig Dis Sci*. 2013 Oct;58(10):3017-23. doi: 10.1007/s10620-013-2743-5.
28. Söderberg C, Stål P, Askling J, Glaumann H, Lindberg G, Marmur J, et al. Decreased survival of subjects with elevated liver function tests during a 28-year follow-up. *Hepatology*. 2010 Feb;51(2):595-602. doi: 10.1002/hep.23314.
29. Hafliadottir S, Jonasson JG, Norland H, Einarsdottir SO, Kleiner DE, Lund SH. Long-term follow-up and liver-related death rate in patients with non-alcoholic and alcoholic related fatty liverdisease. *BMC Gastroenterol*. 2014 Sep 27;14:166. doi: 10.1186/1471-230X-14-166.
30. National Heart, Lung, and Blood Institute . *Morbidity & Mortality: 2012 Chart Book on Cardiovascular, Lung, and Blood Diseases*. National Institutes of Health. National Heart, Lung, and Blood Institute. 2012.
31. National Heart, Lung, and Blood Institute . *Incidence and Prevalence: 2006 Chart Book on Cardiovascular and Lung Diseases*. National Institutes of Health. National Heart, Lung, and Blood Institute. 2006.
32. Centers for Disease Control and Prevention. National Center for Health Statistics. *Underlying Cause of Death 1999-2013 on CDC WONDER Online*

- Database, released 2015. Data are from the Multiple Cause of Death Files, 1999-2013, as compiled from data provided by the 57 vital statistics jurisdictions through the Vital Statistics Cooperative Program. Accessed at <http://wonder.cdc.gov/ucd-icd10.html> on Apr 16, 2015.
33. Geiss LS, Wang J, Cheng YJ, Thompson TJ, Barker L, Li Y, et al. Prevalence and incidence trends for diagnosed diabetes among adults aged 20 to 79 years, United States, 1980-2012. *JAMA*. 2014 Sep 24;312(12):1218-26. doi: 10.1001/jama.2014.11494.
  34. Fishman EI, Stokes A, Preston SH. The dynamics of diabetes among birth cohorts in the U.S. *Diabetes Care*. 2014 Apr;37(4):1052-9. doi: 10.2337/dc13-1982.
  35. Daouli J, Davillas A, Demoussis M, Giannakopoulos N. Obesity persistence and duration dependence: evidence from a cohort of US adults (1985-2010). *Econ Hum Biol*. 2014 Jan;12:30-44. doi: 10.1016/j.ehb.2013.07.002.
  36. Gordon-Larsen P, Adair LS, Nelson MC, Popkin BM. Five-year obesity incidence in the transition period between adolescence and adulthood: the National Longitudinal Study of Adolescent Health. *Am J Clin Nutr*. 2004 Sep;80(3):569-75.
  37. Parikh NI, Pencina MJ, Wang TJ, Lanier KJ, Fox CS, D'Agostino RB, et al. Increasing trends in incidence of overweight and obesity over 5 decades. *Am J Med*. 2007 Mar;120(3):242-50.
  38. Williamson DF, Kahn HS, Byers T. The 10-y incidence of obesity and major weight gain in black and white US women aged 30-55 y. *Am J Clin Nutr*. 1991 Jun;53(6 Suppl):1515S-1518S.
  39. Schneider ALC, Lazo M, Selvin E, Clark JM. Racial differences in nonalcoholic fatty liver disease in the U.S. population. *Obesity (Silver Spring)*. 2014;22(1):292-299. doi:10.1002/oby.20426.
  40. Kelishadi R, Cook SR, Adibi A, Faghihimani Z, Ghatrehsamani S, Beihaghi A, et al. Association of the components of the metabolic syndrome with non-alcoholic fatty liver disease among normal-weight, overweight and obese children and adolescents. *Diabetol Metab Syndr*. 2009 Dec 22;1:29. doi: 10.1186/1758-5996-1-29.
  41. Peng L, Wang J, Li F. Weight reduction for non-alcoholic fatty liver disease. *Cochrane Database Syst Rev*. 2011 Jun 15;(6):CD003619. doi: 10.1002/14651858.CD003619.pub3.
  42. Dassanayake AS, Kasturiratne A, Rajindrajith S, Kalubowila U, Chakravarthi S, De Silva AP, et al. Prevalence and risk factors for non-alcoholic fatty liver disease among adults in an urban Sri Lankan population. *J Gastroenterol Hepatol*. 2009 Jul;24(7):1284-8. doi: 10.1111/j.1440-1746.2009.05831.x.
  43. Lee K, Sung JA, Kim JS, Park TJ. The roles of obesity and gender on the relationship between metabolic risk factors and non-alcoholic fatty liver disease in Koreans. *Diabetes Metab Res Rev*. 2009 Feb;25(2):150-5. doi: 10.1002/dmrr.924.
  44. Zeb I, Katz R, Nasir K, Ding J, Rezaeian P, Budoff MJ. Relation of nonalcoholic fatty liver disease to the metabolic syndrome: the Multi-Ethnic Study of Atherosclerosis. *J Cardiovasc Comput Tomogr*. 2013 Sep-Oct;7(5):311-8. doi: 10.1016/j.jcct.2013.08.011.
  45. Chan WK, Tan AT, Vethakkan SR, Tah PC, Vijayanathan A, Goh KL. Non-alcoholic fatty liver disease in diabetics - prevalence and predictive factors in a multiracial hospital clinic population in Malaysia. *J Gastroenterol Hepatol*. 2013 Aug;28(8):1375-83. doi: 10.1111/jgh.12204.
  46. Papandreou D, Karabouta Z, Pantoleon A, Rousso I. Investigation of anthropometric, biochemical and dietary parameters of obese children with and without non-alcoholic fatty liver disease. *Appetite*. 2012 Dec;59(3):939-44. doi: 10.1016/j.appet.2012.09.006.
  47. Abid A, Taha O, Nseir W, Farah R, Grosovski M, Assy N. Soft drink consumption is associated with fatty liver disease independent of metabolic syndrome. *J Hepatol*. 2009 Nov;51(5):918-24. doi: 10.1016/j.jhep.2009.05.033.
  48. Wong VW, Wong GL, Yip GW, Lo AO, Limquiaco J, Chu WC, et al. Coronary artery disease and cardiovascular outcomes in patients with non-alcoholic fatty liver disease. *Gut*. 2011 Dec;60(12):1721-7. doi: 10.1136/gut.2011.242016.
  49. Hamaguchi M, Kojima T, Takeda N, Nagata C, Takeda J, Sarui H, et al. Nonalcoholic fatty liver disease is a novel predictor of cardiovascular disease. *World J Gastroenterol*. 2007 Mar 14;13(10):1579-84.
  50. Fan JG, Li F, Cai XB, Peng YD, Ao QH, Gao Y. Effects of nonalcoholic fatty liver disease on the development of metabolic disorders. *J Gastroenterol Hepatol*. 22, 1086-1091 (2007).
  51. Targher G, Bertolini L, Rodella S, Tessari R, Zenari L, Lippi G, et al. Nonalcoholic fatty liver disease is independently associated with an increased incidence of cardiovascular events in type 2 diabetic patients. *Diabetes Care* 30, 2119-2121 (2007).
  52. Treeprasertsuk S, Leverage S, Adams LA, Lindor KD, St Sauver J, Angulo P. The Framingham risk score and heart disease in nonalcoholic fatty liver disease. *Liver Int*. 32, 945-950 (2012).
  53. Canoy D, Cairns BJ, Balkwill A, Wright FL, Green J, Reeves G, et al. Body mass index and incident coronary heart disease in women: a population-based prospective study. *BMC Med*. 2013 Apr 2;11:87. doi: 10.1186/1741-7015-11-87.
  54. Global Burden of Metabolic Risk Factors for Chronic Diseases Collaboration (BMI Mediated Effects), Lu Y, Hajifathalian K, Ezzati M, Woodward M, Rimm EB, Danaei G. Metabolic mediators of the effects of body-mass index, overweight, and obesity on coronary heart disease and stroke: a pooled analysis of 97 prospective cohorts with 1.8 million participants. *Lancet*. 2014 Mar 15;383(9921):970-83. doi: 10.1016/S0140-6736(13)61836-X.
  55. Gruson E, Montaye M, Kee F, Wagner A, Bingham A, Ruidavets JB, et al. Anthropometric assessment of abdominal obesity and coronary heart disease risk in men: the PRIME study. *Heart*. 2010 Jan;96(2):136-40. doi: 10.1136/hrt.2009.171447.
  56. de Hollander EL, Bogers RP, Boshuizen HC, Rosengren A, Shipley MJ, Knekt P, et al. Influence of calendar period on the association between BMI and coronary heart disease: a meta-analysis of 31 cohorts. *Obesity (Silver Spring)*. 2013 May;21(5):865-80. doi: 10.1002/oby.20043.
  57. Labounty TM, Gomez MJ, Achenbach S, Al-Mallah M, Berman DS, Budoff MJ, et al. Body mass index and the prevalence, severity, and risk of coronary artery disease: an international multicentre study of 13,874 patients. *Eur Heart J Cardiovasc Imaging*. 2013 May;14(5):456-63. doi: 10.1093/ehjci/jes179.
  58. Mongraw-Chaffin ML, Peters SA, Huxley RR, Woodward M. The sex-specific association between BMI and coronary heart disease: a systematic review and meta-analysis of 95 cohorts with 1.2 million participants. *Lancet Diabetes Endocrinol*. 2015 Jun;3(6):437-49. doi: 10.1016/S2213-8587(15)00086-8.
  59. Park YS, Kim JS. Obesity phenotype and coronary heart disease risk as estimated by the Framingham risk score. *J Korean Med Sci*. 2012 Mar;27(3):243-9. doi: 10.3346/jkms.2012.27.3.243.
  60. Taylor AE, Ebrahim S, Ben-Shlomo Y, Martin RM, Whincup PH, Yarnell JW, et al. Comparison of the associations of body mass index and measures of central adiposity and fat mass with coronary heart disease, diabetes, and all-cause mortality: a study using data from 4 UK cohorts. *Am J Clin Nutr*. 2010 Mar;91(3):547-56. doi: 10.3945/ajcn.2009.28757.
  61. Peters SA, Huxley RR, Woodward M. Diabetes as risk factor for incident coronary heart disease in women compared with men: a systematic review and meta-analysis of 64 cohorts including 858,507 individuals and 28,203 coronary events. *Diabetologia*.

- 2014 Aug;57(8):1542-51. doi: 10.1007/s00125-014-3260-6.
62. Shibata M, Kihara Y, Taguchi M, Tashiro M, Otsuki M. Nonalcoholic fatty liver disease is a risk factor for type 2 diabetes in middle-aged Japanese men. *Diabetes Care* 30, 2940–2944 (2007).
  63. Kim CH, Park JY, Lee KU, Kim JH, Kim HK. Fatty liver is an independent risk factor for the development of Type 2 diabetes in Korean adults. *Diabet. Med.* 25, 476–481 (2008).
  64. Yamada T, Fukatsu M, Suzuki S, Wada T, Yoshida T, Joh T. Fatty liver predicts impaired fasting glucose and type 2 diabetes mellitus in Japanese undergoing a health checkup. *J. Gastroenterol. Hepatol.* 25, 352–356 (2010).
  65. Sung KC, Kim SH. Interrelationship between fatty liver and insulin resistance in the development of type 2 diabetes. *J. Clin. Endocrinol. Metab.* 96, 1093–1097 (2011).
  66. Bae JC, Rhee EJ, Lee WY, Park SE, Park CY, Oh KW, et al. Combined effect of nonalcoholic fatty liver disease and impaired fasting glucose on the development of type 2 diabetes: a 4 year retrospective longitudinal study. *Diabetes Care* 34, 727–729 (2011).
  67. Sung KC, Jeong WS, Wild SH, Byrne CD. Combined influence of insulin resistance, overweight/obesity, and fatty liver as risk factors for type 2 diabetes. *Diabetes Care* 35, 717–722 (2012).
  68. Kasturiratne A, Weerasinghe S, Dassanayake AS, Rajindrajith S, de Silva AP, Kato N, et al. Influence of non-alcoholic fatty liver disease on the development of diabetes mellitus. *J Gastroenterol Hepatol.* 2013 Jan;28(1):142-7. doi: 10.1111/j.1440-1746.2012.07264.x.
  69. Abdullah A, Peeters A, de Courten M, Stoelwinder J. The magnitude of association between overweight and obesity and the risk of diabetes: a meta-analysis of prospective cohort studies. *Diabetes Res Clin Pract.* 2010 Sep;89(3):309-19. doi: 10.1016/j.diabres.2010.04.012.
  70. Nyamdorj R, Qiao Q, Söderberg S, Pitkaniemi JM, Zimmet PZ, Shaw JE, et al. BMI compared with central obesity indicators as a predictor of diabetes incidence in Mauritius. *Obesity (Silver Spring)*. 2009 Feb;17(2):342-8. doi: 10.1038/oby.2008.503.
  71. Rolando L, Byrne DW, McGown PW, Goetzel RZ, Elasy TA, Yarbrough MI. Health risk factor modification predicts incidence of diabetes in an employee population: results of an 8-year longitudinal cohort study. *J Occup Environ Med.* 2013 Apr;55(4):410-5. doi: 10.1097/JOM.0b013e31827cbaec.
  72. Rodbard HW, Bays HE, Gavin JR 3rd, Green AJ, Bazata DD, Lewis SJ, et al. Rate and risk predictors for development of self-reported type-2 diabetes mellitus over a 5-year period: the SHIELD study. *Int J Clin Pract.* 2012 Jul;66(7):684-91. doi: 10.1111/j.1742-1241.2012.02952.x.
  73. Kodama S, Horikawa C, Fujihara K, Yoshizawa S, Yachi Y, Tanaka S, Quantitative relationship between body weight gain in adulthood and incident type 2 diabetes: a meta-analysis. *Obes Rev.* 2014 Mar;15(3):202-14. doi: 10.1111/obr.12129.
  74. Bell JA, Kivimaki M, Hamer M. Metabolically healthy obesity and risk of incident type 2 diabetes: a meta-analysis of prospective cohort studies. *Obes Rev.* 2014 Jun;15(6):504-15. doi: 10.1111/obr.12157.
  75. Guh DP, Zhang W, Bansback N, Amarsi Z, Birmingham CL, Anis AH. The incidence of co-morbidities related to obesity and overweight: a systematic review and meta-analysis. *BMC Public Health.* 2009 Mar 25;9:88. doi: 10.1186/1471-2458-9-88.
  76. Emond JA, Patterson RE, Jardack PM, Arab L. Using doubly labeled water to validate associations between sugar-sweetened beverage intake and body mass among White and African-American adults. *Int J Obes (Lond).* 2014 Apr;38(4):603-9. doi: 10.1038/ijo.2013.130.
  77. Grimes CA, Riddell LJ, Campbell KJ, Nowson CA. Dietary salt intake, sugar-sweetened beverage consumption, and obesity risk. *Pediatrics.* 2013 Jan;131(1):14-21. doi: 10.1542/peds.2012-1628.
  78. Parikh NI, Gona P, Larson MG, Fox CS, Benjamin EJ, Murabito JM, et al. Long-term trends in myocardial infarction incidence and case fatality in the National Heart, Lung, and Blood Institute's Framingham Heart study. *Circulation.* 2009;119:1203–1210.
  79. Floyd KC, Yarzebski J, Spencer FA, Lessard D, Dalen JE, Alpert JS, et al. A 30-year perspective (1975–2005) into the changing landscape of patients hospitalized with initial acute myocardial infarction: Worcester Heart Attack Study. *Circ Cardiovasc Qual Outcomes.* 2009;2:88–95.
  80. Roger VL, Weston SA, Gerber Y, Killian JM, Dunlay SM, Jaffe AS, et al. Trends in incidence, severity, and outcome of hospitalized myocardial infarction. *Circulation.* 2010;121:863–869.
  81. Yeh RW, Sidney S, Chandra M, Sorel M, Selby JV, Go AS. Population trends in the incidence and outcomes of acute myocardial infarction. *N Engl J Med.* 2010;362:2155–2165.
  82. Foster T, Anania FA, Li D, Katz R, Budoff M. The prevalence and clinical correlates of nonalcoholic fatty liver disease (NAFLD) in African Americans: the multi ethnic study of atherosclerosis (MESA). *Dig Dis Sci.* 2013 Aug;58(8):2392-8. doi: 10.1007/s10620-013-2652-7.
  83. Farrell GC, Larter CZ. Nonalcoholic fatty liver disease: from steatosis to cirrhosis. *Hepatology.* 2006 Feb;43(2 Suppl 1):S99-S112.
  84. Zhang E1, Wartelle-Bladou C, Lepanto L, Lachaine J, Cloutier G, Tang A. Cost-utility analysis of nonalcoholic steatohepatitis screening. *Eur Radiol.* 2015 May 21. [Epub ahead of print]
  85. Baumeister SE1, Völzke H, Marschall P, John U, Schmidt CO, Flessa S, et al. Impact of fatty liver disease on health care utilization and costs in a general population: a 5-year observation. *Gastroenterology.* 2008 Jan;134(1):85-94.
  86. McAdam-Marx C1, McGarry LJ, Hane CA, Biskupiak J, Deniz B, Brixner DI. All-cause and incremental per patient per year cost associated with chronic hepatitis C virus and associated liver complications in the United States: a managed care perspective. *J Manag Care Pharm.* 2011 Sep;17(7):531-46.
  87. Patel D, Terrault NA, Yao FY, Bass NM, Ladabaum U. Cost-effectiveness of hepatocellular carcinoma surveillance in patients with hepatitis C virus-related cirrhosis. *Clin Gastroenterol Hepatol.* 2005 Jan;3(1):75-84.
  88. Thein HH, Isaranuwachai W, Campitelli MA, Feld JJ, Yoshida E, Sherman M, et al. Health care costs associated with hepatocellular carcinoma: a population-based study. *Hepatology.* 2013 Oct;58(4):1375-84. doi: 10.1002/hep.26231. Epub 2013 Mar 15.
  89. Lightwood J, Bibbins-Domingo K, Coxson P, Wang YC, Williams L, Goldman L. Forecasting the future economic burden of current adolescent overweight: an estimate of the coronary heart disease policy model. *Am J Public Health.* 2009 Dec;99(12):2230-7. doi: 10.2105/AJPH.2008.152595.
  90. American Diabetes Association. Economic costs of diabetes in the U.S. in 2012. *Diabetes Care.* 2013 Apr;36(4):1033-46. doi: 10.2337/dc12-2625.
  91. Li Q, Blume SW, Huang JC, Hammer M, Graf TR. The Economic Burden of Obesity by Glycemic Stage in the United States. *Pharmacoeconomics.* 2015 Jul;33(7):735-48. doi: 10.1007/s40273-014-0248-5.
  92. Murray CJ, Vos T, Lozano R, Naghavi M, Flaxman AD, Michaud C, et al. Disability-adjusted life years (DALYs) for 291 diseases and injuries in 21 regions, 1990-2010: a systematic analysis for the Global Burden of Disease Study 2010. *Lancet.* 2012 Dec 15;380(9859):2197-223. doi: 10.1016/S0140-6736(12)61689-4.
  93. Keating CL1, Peeters A, Swinburn BA, Magliano DJ, Moodie ML. Utility-based quality of life associated with overweight and obesity: the Australian

1  
2  
3  
4  
5  
6  
7  
8  
9  
10  
11  
12  
13  
14  
15  
16  
17  
18  
19  
20  
21  
22  
23  
24  
25  
26  
27  
28  
29  
30  
31  
32  
33  
34  
35  
36  
37  
38  
39  
40  
41  
42  
43  
44  
45  
46  
47  
48  
49  
50  
51  
52  
53  
54  
55  
56  
57  
58  
59  
60

diabetes, obesity, and lifestyle study. Obesity (Silver Spring). 2013 Mar;21(3):652-5. doi: 10.1002/oby.20290.

94. Global Health Data Exchange. Global Burden of Disease Study 2010 (GBD 2010) Life Expectancy and Healthy Life Expectancy 1970-2010. Institute for Health Metrics and Evaluation. Accessed at <http://ghdx.healthdata.org/record/global-burden-disease-study-2010-gbd-2010-life-expectancy-and-healthy-life-expectancy-1970> on Apr 23, 2015.

95. Murray CJ, Ezzati M, Flaxman AD, Lim S, Lozano R, Michaud C, GBD 2010: design, definitions, and metrics. Lancet. 2012 Dec 15;380(9859):2063-6. doi: 10.1016/S0140-6736(12)61899-6.

For peer review only

**Additional file 1**

EVEREST Statement: Checklist for health economics paper

|                                                                                                                                                | <b>Study section</b>                         | <b>Additional remarks</b>                                              |
|------------------------------------------------------------------------------------------------------------------------------------------------|----------------------------------------------|------------------------------------------------------------------------|
| <b>Study design</b>                                                                                                                            |                                              |                                                                        |
| (1) The research question is stated                                                                                                            | Introduction                                 | Page 2                                                                 |
| (2) The economic importance of the research question is stated                                                                                 | Introduction                                 | Page 2                                                                 |
| (3) The viewpoint(s) of the analysis are clearly stated and justified                                                                          | Introduction, Methods                        | Page 2 and page 4-5 (interventions)                                    |
| (4) The rationale for choosing the alternative programmes or interventions compared is stated                                                  | Methods                                      | Page 4-5 (interventions)                                               |
| (5) The alternatives being compared are clearly described                                                                                      | Methods                                      | Page 4-5 (interventions)                                               |
| (6) The form of economic evaluation used is stated                                                                                             | Methods                                      | Page 3                                                                 |
| (7) The choice of form of economic evaluation is justified in relation to the questions addressed                                              | Introduction, Methods                        | Page 3                                                                 |
|                                                                                                                                                |                                              |                                                                        |
| <b>Data collection</b>                                                                                                                         |                                              |                                                                        |
| (8) The source(s) of effectiveness estimates used are stated                                                                                   | Methods; Table 1, Table 2                    | Page 5 and 6                                                           |
| (9) Details of the design and results of effectiveness study are given (if based on single study)                                              | N/A                                          | Data derived from peer reviewed literature and national health surveys |
| (10) Details of the method of synthesis or meta-analysis of estimates are given (if based on an overview of a number of effectiveness studies) | Methods                                      | Page 6                                                                 |
| (11) The primary outcome measure(s) for the economic evaluation are clearly stated                                                             | Methods                                      | Page 5                                                                 |
| (12) Methods to value health states and other benefits are stated                                                                              | Methods                                      | Page 5; table 1                                                        |
| (13) Details of the subjects from whom valuations were obtained are given                                                                      | N/A                                          |                                                                        |
| (14) Productivity changes (if included) are reported separately                                                                                | N/A                                          |                                                                        |
| (15) The relevance of productivity changes to the study question is discussed                                                                  | N/A                                          |                                                                        |
| (16) Quantities of resources are reported separately from their unit costs                                                                     | Methods; stated per person; Table 1, Table 2 | Page 5 and 6                                                           |
| (17) Methods for the estimation of quantities and unit costs are described                                                                     | Methods; Table 1, Table 2                    | Page 5 and 6; Adopted from literature                                  |

|                                                                                              |                           |              |
|----------------------------------------------------------------------------------------------|---------------------------|--------------|
| (18) Currency and price data are recorded                                                    | Methods; Table 1, Table 2 | Page 5 and 6 |
| (19) Details of currency of price adjustments for inflation or currency conversion are given | Methods                   | Page 5       |
| (20) Details of any model used are given                                                     | Methods                   | Page 3       |
| (21) The choice of model used and the key parameters on which it is based are justified      | Methods                   | Page 3       |
|                                                                                              |                           |              |
| <b>Analysis and interpretation of results</b>                                                |                           |              |
| (22) Time horizon of costs and benefits is stated                                            | Methods                   | Page 5       |
| (23) The discount rate(s) is stated                                                          | Methods                   | Page 5       |
| (24) The choice of rate(s) is justified                                                      | Methods                   | Page 5       |
| (25) An explanation is given if costs or benefits are not discounted                         | N/A                       |              |
| (26) Details of statistical tests and confidence intervals are given for stochastic data     | N/A                       |              |
| (27) The approach to sensitivity analysis is given                                           | Methods                   | Page 6       |
| (28) The choice of variables for sensitivity analysis is justified                           | Methods; Table 1, Table 2 | Page 6       |
| (29) The ranges over which the variables are varied are stated                               | Table 1, Table 2          | Page 6       |
| (30) Relevant alternatives are compared                                                      | Methods, Results          | Page 4 and 5 |
| (31) Incremental analysis is reported                                                        | N/A                       |              |
| (32) Major outcomes are presented in a disaggregated as well as aggregated form              | Table 3, 4 and 5          | Page 7 and 9 |
| (33) The answer to the study question is given                                               | Discussion, Conclusion    | Page 10      |
| (34) Conclusions follow from the data reported                                               | Conclusion                | Page 11      |
| (35) Conclusions are accompanied by the appropriate caveats                                  | Discussion, Conclusion    | Page 10      |

# BMJ Open

## Non-alcoholic fatty liver disease as a mediator of detriments of dietary sugar consumption: implications for the health and economic benefits of interventions in the United States

|                                 |                                                                                                                                                                                                                                                                                                                                                                                                                                                                                                                                                                                                                                                                                                                          |
|---------------------------------|--------------------------------------------------------------------------------------------------------------------------------------------------------------------------------------------------------------------------------------------------------------------------------------------------------------------------------------------------------------------------------------------------------------------------------------------------------------------------------------------------------------------------------------------------------------------------------------------------------------------------------------------------------------------------------------------------------------------------|
| Journal:                        | <i>BMJ Open</i>                                                                                                                                                                                                                                                                                                                                                                                                                                                                                                                                                                                                                                                                                                          |
| Manuscript ID                   | bmjopen-2016-013543.R1                                                                                                                                                                                                                                                                                                                                                                                                                                                                                                                                                                                                                                                                                                   |
| Article Type:                   | Research                                                                                                                                                                                                                                                                                                                                                                                                                                                                                                                                                                                                                                                                                                                 |
| Date Submitted by the Author:   | 14-Apr-2017                                                                                                                                                                                                                                                                                                                                                                                                                                                                                                                                                                                                                                                                                                              |
| Complete List of Authors:       | Vreman, Rick; University of California, San Francisco, Philip R. Lee Institute for Health Policy Studies<br>Goodell, Alex; University of California, San Francisco, Philip R. Lee Institute for Health Policy Studies<br>Rodriguez, Luis; University of California, Department of Epidemiology & Biostatistics<br>Porco, Travis; University of California, San Francisco, FI Proctor Foundation for Research in Ophthalmology<br>Lustig, Robert; University of California, San Francisco, Philip R. Lee Institute for Health Policy Studies; University of California San Francisco, Department of Pediatrics<br>Kahn, James; University of California, San Francisco, Philip R. Lee Institute for Health Policy Studies |
| <b>Primary Subject Heading</b>: | Public health                                                                                                                                                                                                                                                                                                                                                                                                                                                                                                                                                                                                                                                                                                            |
| Secondary Subject Heading:      | Nutrition and metabolism, Health policy, Health economics, Diabetes and endocrinology                                                                                                                                                                                                                                                                                                                                                                                                                                                                                                                                                                                                                                    |
| Keywords:                       | Added sugar, Non-alcoholic fatty liver disease, Type 2 diabetes, Microsimulation, Obesity, Fructose                                                                                                                                                                                                                                                                                                                                                                                                                                                                                                                                                                                                                      |
|                                 |                                                                                                                                                                                                                                                                                                                                                                                                                                                                                                                                                                                                                                                                                                                          |

SCHOLARONE™  
Manuscripts

# Non-alcoholic fatty liver disease as a mediator of detriments of dietary sugar consumption: implications for the health and economic benefits of interventions in the United States

Rick A Vreman<sup>1</sup>, Alex J Goodell<sup>1</sup>, Luis A Rodriguez<sup>2</sup>, Travis C Porco<sup>2,3</sup>, Robert H Lustig<sup>1,4</sup>, James G Kahn<sup>1</sup>

<sup>1</sup> Philip R. Lee Institute for Health Policy Studies, University of California San Francisco, California, United States of America;

<sup>2</sup> Department of Epidemiology & Biostatistics, University of California, San Francisco, California, United States of America;

<sup>3</sup> FI Proctor Foundation for Research in Ophthalmology, University of California, San Francisco, United States of America

<sup>4</sup> Department of Pediatrics, University of California San Francisco, California, United States of America

Contact information corresponding author:

Rick A Vreman

Nachtegaalstraat 20 BisA

3581 AH Utrecht

The Netherlands

T: +31-614661403

E: r.a.vreman@gmail.com

## Abstract

**Objectives:** Excessive consumption of added sugars in the human diet has been associated with obesity, type 2 diabetes (T2D), coronary heart disease (CHD), and other elements of the metabolic syndrome. Recent studies have shown that non-alcoholic fatty liver disease (NAFLD) is a critical pathway to metabolic syndrome. This model assesses the health and economic benefits of interventions aimed at reducing intake of added sugars.

**Methods:** Using data from U.S. National Health Surveys and current literature, we simulated an open cohort, for the period 2015 to 2035. We constructed a microsimulation model with Markov chains for NAFLD (including steatosis, non-alcoholic steatohepatitis (NASH), cirrhosis, and hepatocellular carcinoma (HCC)), body mass index (BMI), T2D, and CHD. We assessed reductions in population disease prevalence, disease-attributable disability-adjusted life years (DALYs), and costs, with interventions that reduce added sugars consumption by either 20% or 50%.

**Findings:** The model estimated that a 20% reduction in added sugars intake will reduce prevalence of hepatic steatosis, NASH, cirrhosis, HCC, obesity, T2D, and CHD. Incidence of T2D and CHD would be expected to decrease by 19.9 (95% CI: 12.8 – 27.0) and 9.4 (95% CI: 3.1 – 15.8) cases per 100,000 people after 20 years, respectively. A 20% reduction in consumption is also projected to annually avert 0.767 million (M) DALYs (95% CI: 0.757M – 0.777M), and a total of 10.3 billion (B) USD (95% CI: 10.2B – 10.4B) in discounted direct medical costs by 2035. These effects increased proportionally when added sugars intake were reduced by 50%.

**Conclusions:** The decrease in incidence and prevalence of disease is similar to results in other models, but averted costs and DALYs were higher, mainly due to inclusion of NAFLD and CHD. The model suggests that efforts to reduce consumption of added sugars may result in significant public health and economic benefits.

## Strengths and limitations of this study

- No previous model has captured the full effects of added sugars through non-alcoholic fatty liver disease, obesity, type 2 diabetes and coronary heart disease.
- This model is applicable to each intervention that is aimed at reducing added sugars.
- The model is based on input parameters from multiple studies who were not always of excellent quality. We have used large intervals around these parameters to ensure reliable results.

## Introduction

The social and economic burdens of chronic metabolic disease have been increasing in the United States for the last three decades. Two-thirds of the adult population in the United States is now overweight, and morbid obesity affects 9.9% of all adult women.(1) Prevalence of Type 2 diabetes (T2D) in the U.S. is at 9.3%.(2,3) And the population affected by Coronary heart disease (CHD) increased concurrently from 13 to 15.5 million over the last ten years.(4,5) More than 15% of all deaths are attributable to CHD and more than 3% to diabetes.(6) Costs have simultaneously increased; and costs for CHD are expected to double over the next two decades.(7,8) Though these figures are stunning, they underestimate the magnitude of the problem. Non-alcoholic fatty liver disease (NAFLD) has recently been found to be present in over 45% of Latinos, 33% of Caucasians, and 24% of African-Americans, and is thought to play an important role in metabolic pathophysiology.(9–12) NAFLD is defined by the presence of liver fat in the absence of a primary insult such as alcohol, viral hepatitis, or heavy metal accumulation.(13) NAFLD is further categorized into: a) hepatic steatosis, which is a reversible fat accumulation in the liver defined by an occupation of steatotic hepatocytes of more than 5% of the liver parenchyma; and b) non-alcoholic steatohepatitis (NASH), which is defined as the presence of hepatic steatosis along with lobular and portal inflammation with hepatocyte injury (ballooning). Progressive collagen deposition and vascular remodelling in NASH may lead to cirrhosis, which in turn predisposes one to hepatocellular carcinoma (HCC).(9,13–15) NAFLD is the most common cause of liver disease in the Western world, and NASH is projected to become the leading cause of liver transplantation in the USA by the year 2020.(16,17) Currently 30-40% of NASH-cirrhotic patients succumb to a liver-related death within 10 years.(18,19) Hospitalizations for NAFLD have increased 97% between 2000 and 2012.(20) NAFLD has also been suggested as an important driver of T2D in lean individuals, as liver fat accumulation can cause insulin resistance.(10,21–23) NAFLD can occur as either a cause or consequence of the metabolic syndrome(10), and many now argue that NAFLD is the hepatic manifestation of metabolic syndrome, and should be included in its definition.(24–27) It is important to identify determinants of these metabolic diseases and assess the efficacy of upstream policy interventions to curb the national and the global epidemic of metabolic syndrome.

## Added sugars

Added sugars consumption increased in the U.S. over the years 1977-2000, decreased slightly between 2000–2008, and seems to have stabilized in the years thereafter.(28–30) Over 55% of all American adults consumed more than 50 grams of added sugars per day between 2005–2012, which is thought to be the cut-off value for added risk of metabolic derangement, and more than the advised maximum according to the American Heart Association (25 - 37.5 grams). Furthermore, U.S. adolescents during this period averaged 94.0 grams per day.(3,31,32) The European Food and Safety authority does not state an explicit maximum for (added) sugars in their advice, but they do note that a number of authorities have established boundaries of <10% of total energy intake.(33)

The excessive amount of added sugars (glucose + fructose) in the food supply has been associated with NAFLD and with each of the component diseases of the metabolic syndrome.(34–36) Fructose is metabolized by the liver, as it is the only organ with the required Glut5 transporter. Fructose bypasses glycogen, and is metabolized by the glycolytic pathway to acetyl-CoA. From there, excess acetyl-CoA is converted to citrate, diverted from the mitochondria into the cytoplasm via the citrate shuttle, and is then converted into fatty acids through the process of *de novo* lipogenesis(DNL).(37) From there, hepatically-derived excess triglyceride is either packaged with apo-B100 into very-low-density-lipoprotein (VLDL), which is released into the bloodstream and can foment cardiovascular disease; or will precipitate as a lipid droplet, resulting in hepatic steatosis which drives insulin resistance, causing weight gain, and predisposing to T2D. While most early studies of added sugar and chronic disease were correlative and confounded by excess caloric administration, lack of adjustment for total calories, or adiposity, more recent studies demonstrate that the effect is specific for dietary fructose, and independent of calories consumed and BMI.(37–46) For instance, added sugar is directly correlated with risk for metabolic syndrome in adolescents in NHANES even after controlling for total calories and BMI z-score.(31) Added sugar has been associated with elevated uric acid levels and hypertension.(47,48) Two recent studies, both controlled for calories and adiposity and employing a time analysis, support sugar-sweetened beverages as a specific causative agent in the pathogenesis of T2D.(40,49,50) A decade-long global econometric analysis demonstrates that only changes in sugar availability are predictive of changes in diabetes prevalence, unrelated to poverty, urbanization, aging, physical activity, total calories, or obesity.(35) Lastly, in a starch-for-sugar exchange study, our group has documented improvements in metabolic and lipid parameters unrelated to both calories and changes in weight, demonstrating improved metabolic health within 10 days.(38,51) We have demonstrated that the decline in DNL and resultant reduction in liver fat was the primary driver in the metabolic and cardiovascular improvement.(52) By demonstrating that removal of dietary fructose (the macronutrient most closely associated with DNL) commensurately improves liver fat and insulin dynamics irrespective of calories or weight, we are able to infer a causative mechanism of metabolic dysfunction by linking DNL to both liver fat and insulin resistance. We also demonstrated that despite an increase in the glucose (starch) content of the diet, beta-cell insulin secretion reduced, thus protecting against beta-cell exhaustion, thought to be important in the pathogenesis of type 2 diabetes(53); and reducing total body insulin burden, thought to contribute to both obesity and risk for cardiovascular disease.(54,55) Thus, reduction in DNL and liver fat through reduction in consumption of added sugars appears to be a primary goal of both therapy and prevention of chronic metabolic disease, and forms the rationale for our microsimulation model.

### *Intervention efficacy*

Several studies have modeled the effects of different interventions to reduce added sugars intake. One popular intervention is the implementation of a sugar-sweetened beverage (SSB) tax. Though this does not affect all added sugars in the food supply, SSB's are the main single contributor to overall added sugars intake, and a tax on SSB's is easier to implement than an added sugars tax.<sup>(56)</sup> A 20% SSB tax is projected to reduce prevalence of obesity anywhere from 1.5 — 10%, based on different studies.<sup>(57–59)</sup> Data from Mexico demonstrate that effects on reduction of consumption are durable, although evidence of mitigation of disease are not yet available.<sup>(60)</sup> Annual diabetes cases would be expected to decline concurrently between 1.8% and 3.4%, and CHD cases by 0.5 — 1.0%.<sup>(58,61)</sup> Additional research has focused on other strategies to lower added sugars consumption. Banning SSB's from the U.S. Supplemental Nutrition Assistance Program (SNAP) is expected to result in a 0.89% lower obesity prevalence within 10 years, while lowering the amount of sugars in the food supply through a cap and trade approach by 1% annually is expected to lower the prevalence of obesity by 1.7% after 20 years.<sup>(62,63)</sup>

An important limitation of all these studies is that none of these models incorporate the effects and costs related to sugar-induced NAFLD. Because NAFLD explains a part of the incidence of diabetes in lean individuals and is expected to contribute significantly to overall healthcare burden and costs, it is necessary that models incorporate all of these diseases.

Our goal is to predict the magnitude of the health and economic effects of interventions that are designed to reduce added sugars consumption either by 20% or 50%, respectively. This modelling approach more precisely quantifies the benefits of reducing added sugar consumption. We describe the process of creating, calibrating and validating a microsimulation model. We clarify the relevant interactions that determine progression within this model in Markov chains for NAFLD (including cirrhosis and HCC), obesity, T2D, and CHD, and we describe the creation of a simulated open cohort representative of the US population. We allow the model to run for 20 years into the future to predict effectiveness. We report the outcomes of these simulations in future incidence, prevalence and mortality of disease, and in disability-adjusted life years (DALYs) and costs averted.

### **Methods**

The Methods section is constructed according to the recommendations by the ISPOR taskforce for good modelling practice, and completeness is checked according to the CHEERS statement.<sup>(64,65)</sup>

### *Summary*

We constructed an individual based model consisting of a base cohort of 22,400 people. New people entered the model each year at age 20, the youngest age group we simulate. Individuals are assigned a state at initialization in each 'chain' of the model. These include age, sex, ethnicity, sugar consumption, NAFLD, BMI, T2D, and CHD. The current health state of each individual at the beginning of a cycle forms a risk profile, and the presence in a risk-inducing state in one of the chains can influence the probability of transitioning between states in a different chain, according to literature-based odds ratios. We simulated 20 annual cycles for each individual, counting events, incurred direct medical costs, and DALYs for each cycle, as well as the overall prevalence for the total cohort. We discounted the costs and DALYs by 3.0% annually, and costs were presented in 2015 USD. Two interventions were simulated: one that reduced each individual's added sugars consumption by 20%, and one that reduced it by 50%. We used identical random numbers for the base case scenario and each of the interventions, to reduce variance. We calibrated the model to other studies reporting historic trends and predicting future prevalence, and validated the model via face validation, cross-validation, and sensitivity analyses. Deterministic sensitivity analysis was used to determine the influence of individual input parameters. Probabilistic sensitivity analysis was used to generate mean results and 95% central coverage intervals.

### *Model type*

An individual-based stochastic Markov model (microsimulation) was used. The model contained a chain for each of four separate diseases. Because each of these diseases has a minimum of 3 states, and the transitions between these states are based on the presence or absence of a set of risk factors, the state-space explosion phenomenon prohibits us from using traditional Markov cohort simulation. An individual-based approach makes it possible to use individual-specific transition rates, capturing the effect of interventions on individual risk factor profiles, thereby avoiding the need to count the number of individuals in all possible states and allowing for complex relationships between several risk factors within a single individual.<sup>(66)</sup> It also opens up potential for future analyses among subgroups.

### *Population and setting*

The model is based on the adult population (age 20+) of the United States. Outcomes are reported from a healthcare perspective. This includes direct medical costs and DALYs averted. Indirect medical or non-medical costs are excluded. Because this model is meant to assess the benefits of reducing added sugars intake, unrelated to the type of intervention, costs of implementing any specific intervention and possible revenues (e.g. in the case of an excise or general services tax) are also excluded.

### *Model structure and input parameters*

1  
2  
3 A simplified model transition diagram is presented in **Figure 1**. Individuals will reside in a state within each chain at any  
4 given point in time. The probability of staying within a state or moving to another state in each cycle is determined by a set  
5 of defined transition probabilities, which are influenced by the risk profile (the current state in the other chains) of the  
6 individual. Events in different chains can occur in parallel.

7  
8 The simulation is initialized by assignment of age (A), sex (S), and ethnicity (E) to each individual. Age states are based on  
9 the population distribution that is provided by the Bureau of the Census, and are specified for each age from 20 to 84 and a  
10 cumulative age group for anyone above 85. We simulate an open cohort. New individuals with age 20 enter each year.<sup>(67)</sup>  
11 The initial age distribution is specified in supplementary **table 2**. Male and female sex are incorporated with an initial  
12 distribution specified in supplementary **table 3**. Ethnicities incorporated into the model are Hispanic, non-Hispanic black,  
13 and non-Hispanic-white. Data availability did not allow us to incorporate Asians and Native Americans as separate groups  
14 and therefore they were grouped with the non-Hispanic whites. The initial ethnicity distribution is specified in  
15 supplementary **table 4**.

16  
17 When the individual is assigned an age, sex and ethnicity, these determine the state that this individual will be assigned to  
18 in each of the chains for NAFLD, BMI, T2D, and CHD at the start of the simulation. Each chain represents a separate disease  
19 process, and has its own non-disease state (e.g., non-T2D). This does not mean that this person is actually healthy (e.g. a  
20 person can have cirrhosis but not diabetes). The NAFLD chain includes a non-NAFLD state, and states for hepatic steatosis,  
21 NASH, cirrhosis, and NASH- or cirrhosis-related HCC. A person is defined as having NAFLD when his or her current state is  
22 steatosis, NASH, or cirrhosis. This is different from common terminology, where cirrhosis is excluded. We chose this  
23 definition for easy reference, because these three states imply extra risk for progression within other chains. The initial  
24 distribution over NAFLD states is specified in supplementary **table 5** and specified per ethnicity group.

25  
26 It is important to note that modeled cirrhosis and HCC are specifically related to steatosis and NASH, and do not include all  
27 cirrhosis and HCC cases within the population, irrespective of cause. Transition directly from the non-NAFLD state to either  
28 one is therefore not possible. Baseline transition probabilities are specified in **table 2** and transition rates from NASH and  
29 cirrhosis to HCC are specified per age group, as defined in supplementary **table 10 and 11**, starting at age 40. (age groups:  
30 40-44, 50-54, 55-59, 60-64, 65-69, 70-74, 75-79 and 80 years and over), Risk factors for progression are stated in **table 2** and  
31 include ethnicity (protective and detrimental factors), being overweight or obese, and high sugar consumption. These risk  
32 factors apply for transitions up to the cirrhosis state.

33  
34 The BMI chain includes states for healthy weight, overweight and obesity. The initial distribution over BMI states is  
35 specified in supplementary **table 8**, and specified by sex, ethnicity, and age group (ages 20-35, 35-44, 45-54, 55-64, 65-74,  
36 75-84 and 85+). Baseline transition probabilities are specified in **table 2**. Risk factors for progression are stated in **table 1**  
37 and include NAFLD disease states and high sugar consumption.

38  
39 The T2D chain includes a non-T2D state and a T2D state. The initial distribution over T2D states is specified in  
40 supplementary **table 7** and specified by sex, ethnicity, and age group (ages 20-35, 35-44, 45-54, 55-64, 65-74 75-84 and  
41 85+). Average baseline transition probability to T2D is specified in **table 2** and age-specific incidence rates are provided in  
42 supplementary **table 14** (age groups: 20-24, 25-29, 30-34, 35-39, 40-44, 45-49, 50-54, 55-59, 60-64, 65-69, 70-74, 75-79 and  
43 80+). Risk factors for progression to T2D are stated in **table 2** and include NAFLD disease states, overweight, and obesity.

44  
45 The CHD chain includes a non-CHD state and a CHD state. The distribution over CHD states at simulation start is specified in  
46 supplementary **table 6** and specified per sex, ethnicity and age group (ages 20-44, 45-64 and 65+). Average baseline  
47 transition probability to CHD is specified in **table 2** and age-specific incidence rates are provided in supplementary **table 12**  
48 (age groups: <35, 35-39, 40-44, 45-49, 50-54, 55-59, 60-64, 65-69, 70-74, 75-79, 80-84 and 85+). Risk factors for progression  
49 to CHD are stated in **table 2** and include NAFLD disease states, overweight, obesity, and T2D.

50  
51 Each individual is assigned a level of consumption of added sugars. There are two states in the sugar chain — high  
52 consumption ( $\geq 50$ g of added sugars per day), and low consumption ( $< 50$ g of added sugars per day). The distribution of  
53 these states among the study population reflects the data of the NHANES 2005-2012, and is specified per sex and ethnicity  
54 group, as shown by supplementary **table 9**.<sup>(3,31)</sup> Sugar consumption is fixed throughout the simulation for each person.

55  
56 From each state, individuals can transition to a 'non-disease related death' state. Three disease chains also have a disease-  
57 specific death state (i.e.. T2D-death, CHD-death, and liver-related death), allowing calculation of disease-attributable death.  
58 Mortality rates from causes outside the model were corrected for the competing risks of modeled causes of mortality to  
59 ensure valid overall mortality. Death in one chain forces an instant transition to the death state in other chains. Average  
60 transition probabilities to disease-related death states are specified in **table 2**. Age specific rates for T2D-related death are  
specified in supplementary **table 15**. Liver death rates are specified in **table 2**. Deaths were attributed to the disease for  
which the transition to death was established first. To remove confounding because of calculation order, chain calculation  
order was randomized. This ensures that deaths are attributed to the right disease, e.g. people with T2D and CHD have a  
chance to die of T2D, CHD or succumb to a non-disease related death.

To determine whether there were temporal trends in incidence or death rates, we plotted the available historic data (1999-2013) and projected this to the future.<sup>(5,6,68)</sup> These trends were found to be present for the incidence and mortality rate of CHD, and for the non-disease specific mortality rate. We incorporated these regression rates into the model by adjusting the respective baseline transition probabilities before each cycle. Average baseline transition probabilities for CHD and non-disease related deaths are specified in **table 2**. The CHD-specific death rates by year and age are specified in supplementary **table 13** and the non-disease related death rates per year and age are specified in supplementary **table 16**.

Final transition probabilities per chain are compared to a pseudo-random number to determine state-transitions each cycle. These final transition probabilities were derived from baseline transition probabilities, adjusting for the relative risk of progression observed for applicable risk factors. The correction formula for the baseline transition probabilities is a multiplicative function of all applicable values for present risk factors (odds ratios).

#### Figure 1

##### *Interventions*

Two interventions were simulated: a reduction of 20%, and a reduction of 50% in individual added sugars consumption. A 20% reduction in added sugars was simulated to be consistent with the percentage reduction assessed in several studies.<sup>(57–59)</sup> In addition, a 50% reduction was simulated because the American Heart Association advises 6-9 teaspoons of added sugar (for females and males respectively) as a maximum per day, which is approximately 50% of the current average consumption.<sup>(3,31,32)</sup> The individual added sugars consumption distribution was then split into a dichotomous variable; with people consuming less than or equal to 50 grams of added sugars being considered low consumers, and people consuming more than 50 grams per day being considered high consumers. This model did not incorporate substitutions to other food categories, but it did incorporate the overall added sugars reduction, rather than a sole reduction in SSB consumption used in other studies.<sup>(58,61)</sup> This makes it possible to capture the overall effects of added sugars, contrary to the solitary effect of SSB's. The effects of changes in food consumption to other food groups (e.g. proteins, fat) are not modeled. Detrimental effects of these food categories are less well documented and inferior to the effects of added sugars. NHANES data was used to reduce individual added sugars consumption by the specified amount. From these data, new distributions were calculated to reflect subgroup consumption patterns. These distributions determined the ratio between individuals in the high and the low risk group, and therefore determine progression within disease chains. Identical random numbers were used between interventions to reduce variance, as described by Stout and Goldie.<sup>(69)</sup>

##### *Time horizon, cycle length*

The model had a time horizon of 20 years, modeling the calendar years 2015 to 2035. This duration was chosen to make sure effects within chronic diseases (T2D, CHD) were sufficiently visible. The cycle length was 1 year. Individuals could exit the model through each death state, or live until the end of the simulation.

##### *Outcomes*

Outcomes were incidence, prevalence and mortality of disease, and direct medical costs and DALYs averted. Costs were calculated by multiplying prevalence by discounted disease-attributable costs. DALYs were calculated by adding years lived with disability (YLD) and years of life lost (YLL). YLD was calculated as the product of the prevalence of disease times the discounted disability weight. YLL was calculated by multiplying the discounted health-adjusted life expectancy at death by the amount of people that died in that specific year, given a certain age and sex. The discount rate for costs, disability weights, and life expectancy was 3.0% annually. Health-adjusted life expectancy and discounted life expectancy for males and females for the United States were not derived by the model but implemented directly from publications of the Institute for Health Metrics and Evaluation (IHME). They are provided in the online supplement, **table 3 and 4**.

##### *Input parameter determination*

The model parameters that determined demographics and the distribution of risk factors and disease at the start of the simulation are mainly derived from NHIS and NHANES data. If data were not sufficient, current literature was consulted. Model input parameters, their distribution ranges, and the sources from which they were acquired are presented in **tables 1 and 2**. Baseline transition probabilities were derived from literature data, and where necessary, via calibration. Also when necessary, we used logistic conversion to adjust transition rates to reflect annual probabilities. Interaction values were derived from literature data. For interactions between chains, we used conservative data when possible, to ensure no overestimation of effect size. We took special care to ensure these odds ratios reflect the case for our model, i.e. reflect decreased risk due to a reduction in overall added sugars intake, not just a reduction in sugar-sweetened beverage intake, which is more commonly investigated. Regression rates were determined by historic and projected trends reported by the CDC and the American Heart Association.<sup>(3,5,6)</sup> Costs were derived from American population-based studies and, where necessary, were inflated by the inflation calculator of the United States Department of Labor Statistics to 2015 USD.<sup>(70)</sup> Costs were calculated as specific disease-attributable costs (i.e. costs for CHD due to diabetes were counted as costs due to CHD rather than costs due to diabetes). This was necessary to prevent overlapping costs. Disability weights were adopted from World Health Organizations' burden of disease estimates and current literature. Specific sources are provided in the tables.

**Table 1.** Model input values and ranges for disease characteristics. Costs are population based, meaning that they include those who do not get care.

| Disease state | Prevalence at simulation start |         |         |           | Costs (annual) |        |            | Disability weights |       |       |         |
|---------------|--------------------------------|---------|---------|-----------|----------------|--------|------------|--------------------|-------|-------|---------|
|               | Mean                           | Min     | Max     | Ref.      | Mean           | SD     | Ref.       | Mean               | Min   | Max   | Ref.    |
| Steatosis     | 27.955% <sup>#</sup>           | 18.637% | 41.933% | (8,16,18) | 134            | 50     | (71)       | 0.000              | 0.000 | 0.000 | (72–74) |
| NASH          | 3.141% <sup>#</sup>            | 2.094%  | 4.712%  | (8,16,18) | 267            | 100    | (71)       | 0.033              | 0.017 | 0.066 | (72–74) |
| Cirrhosis     | 0.314% <sup>#</sup>            | 0.209%  | 0.471%  | (75,76)   | 2,861          | 1073   | (77)       | 0.194              | 0.127 | 0.273 | (10,71) |
| HCC           | 0.025% <sup>#</sup>            | 0.017%  | 0.038%  | (78,79)   | 42,644         | 15,992 | (72,80,81) | 0.294              | 0.199 | 0.411 | (72–74) |
| CHD           | 6.544% <sup>#</sup>            | -       | -       | (1,2,6)   | 13,233         | 4962   | (6,82)     | 0.066              | 0.043 | 0.095 | (72)    |
| T2D           | 9.447% <sup>#</sup>            | -       | -       | (1,2)     | 8,170          | 3064   | (82–84)    | 0.150              | 0.080 | 0.220 | (72,85) |
| Overweight    | 33.473% <sup>#</sup>           | -       | -       | (1,2)     | 343            | 129    | (82,84)    | 0.000              | 0.000 | 0.000 | (86)    |
| Obesity       | 37.391% <sup>#</sup>           | -       | -       | (1,2)     | 916            | 344    | (82,84)    | 0.012              | 0.001 | 0.022 | (86)    |

SD: standard deviation, NASH: non-alcoholic steatohepatitis, HCC: hepatocellular carcinoma, CHD: coronary heart disease, T2D: type 2 diabetes. CHD, T2D, overweight, and obesity prevalence are not varied in the sensitivity analyses.

<sup>#</sup> Age, sex and/or ethnicity specific values are specified in the online supplement.

**Table 2.** Selected model input parameter values and ranges.

| Parameter                                             | Mean                 | Min      | Max     | Source       |
|-------------------------------------------------------|----------------------|----------|---------|--------------|
| <b>Initialization</b>                                 |                      |          |         |              |
| Age distribution                                      | OS1*                 | -        | -       | (87)         |
| Sex distribution                                      | OS2**                | -        | -       | (87)         |
| Ethnicity distribution                                | OS3***               | -        | -       | (87)         |
| High sugar consumption                                | 57.278% <sup>#</sup> | 38.186%  | 85.917% | (3,31,40)    |
| <b>Baseline transition probabilities<sup>##</sup></b> |                      |          |         |              |
| Non-NAFLD -> steatosis                                | 0.0100               | 0.006700 | 0.01500 | (88–96)      |
| Non-NAFLD -> NASH                                     | 0.0003               | 0.000201 | 0.00045 | (88–96)      |
| Steatosis -> NASH                                     | 0.0060               | 0.004020 | 0.00900 | (88–96)      |
| Steatosis -> cirrhosis                                | 0.0002               | 0.000134 | 0.00030 | (88–96)      |
| NASH -> cirrhosis                                     | 0.0020               | 0.001340 | 0.00300 | (88–96)      |
| NASH -> HCC                                           | 0.0001 <sup>#</sup>  | 0.000067 | 0.00015 | (88–99)      |
| NASH -> liver death                                   | 0.0038               | 0.002546 | 0.00570 | (100–103)    |
| Cirrhosis -> HCC                                      | 0.0200 <sup>#</sup>  | 0.013400 | 0.03000 | (88–99)      |
| Cirrhosis -> liver death                              | 0.0340               | 0.022780 | 0.05100 | (100–103)    |
| HCC -> liver death                                    | 0.5000               | 0.335000 | 0.75000 | (100–103)    |
| Non-CHD -> CHD                                        | 0.0045 <sup>#</sup>  | 0.003015 | 0.00675 | (104,105)    |
| CHD -> CHD death                                      | 0.0100 <sup>#</sup>  | 0.006700 | 0.01500 | (5,6,104)    |
| Non-T2D -> T2D                                        | 0.0045 <sup>#</sup>  | 0.003015 | 0.00675 | (68,106)     |
| T2D -> T2D death                                      | 0.0100 <sup>#</sup>  | 0.006700 | 0.01500 | (6,68,106)   |
| Healthy weight -> overweight                          | 0.0500               | 0.033500 | 0.07500 | (107–110)    |
| Healthy weight -> obese                               | 0.0060               | 0.004020 | 0.00900 | (107–110)    |
| Overweight -> obese                                   | 0.0180               | 0.012060 | 0.02700 | (107–110)    |
| Each alive state -> non-disease related death         | 0.0100 <sup>#</sup>  | 0.006700 | 0.01500 | (6)          |
| <b>Risk factors (odds ratios)</b>                     |                      |          |         |              |
| NHB ethnicity for progression within NAFLD            | 0.93                 | 0.70     | 1.00    | (111)        |
| Hispanic ethnicity for progression within NAFLD       | 1.67                 | 1.22     | 2.22    | (111)        |
| Overweight for progression within NAFLD               | 2.19                 | 1.60     | 3.38    | (89,112–117) |
| Obesity for progression within NAFLD                  | 3.14                 | 2.07     | 5.28    | (89,112–117) |
| High sugar consumption for progression within NAFLD   | 2.00                 | 1.50     | 3.00    | (36,118)     |
| NAFLD for TP non-CHD -> CHD                           | 2.31                 | 1.66     | 3.62    | (119–123)    |
| Overweight for TP non-CHD -> CHD                      | 1.22                 | 1.12     | 1.32    | (124–131)    |
| Obesity for TP non-CHD -> CHD                         | 1.60                 | 1.43     | 1.79    | (124–131)    |
| T2D for TP non-CHD -> CHD                             | 2.24                 | 1.64     | 3.06    | (132)        |

|                                                             |      |      |      |              |
|-------------------------------------------------------------|------|------|------|--------------|
| NAFLD for TP non-T2D -> T2D                                 | 2.73 | 1.87 | 4.46 | (133–139)    |
| Overweight for TP non-T2D -> T2D                            | 2.18 | 1.59 | 3.36 | (140–146)    |
| Obesity for TP non-T2D -> T2D                               | 3.36 | 2.18 | 5.72 | (140–146)    |
| NAFLD for progression within the BMI chain                  | 2.19 | 1.60 | 3.38 | (89,112–117) |
| High sugar consumption for progression within the BMI chain | 2.60 | 1.20 | 6.00 | (145,146)    |

SD: standard deviation, NAFLD: non-alcoholic fatty liver disease (steatosis, NASH & cirrhosis), NASH: non-alcoholic steatohepatitis, HCC: hepatocellular carcinoma, CHD: coronary heart disease, T2D: type 2 diabetes, NHB: non-Hispanic black.

\* See online supplement table 1. \*\* See online supplement table 2. \*\*\* See online supplement table 3.

# Age, sex and/or ethnicity specific values are specified in the online supplement.

## Transition probabilities for regression to less severe disease are specified in the online supplement.

### Calibration

Incidence, prevalence, mortality and costs of overweight and obesity, T2D, and CHD were calibrated to reflect historic data from the CDC and projections from the American Heart Association (AHA) and several individual studies predicting future disease.(6,7,147–151) NASH- and cirrhosis-related HCC incidence and mortality was calibrated to historic trends reported by the CDC, and future predictions reported by the American Cancer Association.(6,152)

### Validation

Validation of the model occurred via face validation, cross-validation, and sensitivity analyses. Face validation was performed manually by the authors. Each chain was checked separately for functionality before merging them. Cross-validation was performed by comparing epidemiological outcomes and predictions from our model with reported results from different studies on each subject, as presented in the Discussion.

Uncertainty was assessed using deterministic and probabilistic sensitivity analysis (DSA & PSA). DSA was conducted using a five-point analysis, with the minima and maxima specified in **tables 1 and 2**. If a mean and standard deviation (SD) are specified, we used a range of mean  $\pm$  1.96\*SD. DSA results are only presented for the two main outcomes: total costs and DALYs averted in the year 2035. PSA was conducted using the distributions defined in **tables 1 and 2**, to produce a mean and 95% central coverage interval for all outcome values by running the simulation 10,000 times (each of which including the base case and two interventions).

### Cohort simulation

To produce stable results, limit computational requirements, and have a cohort that remained representative of the U.S. population, we simulated a base cohort of 22,400 people, with new entry of 416 people each year, reflecting CDC population prospects.(67) Because of computational requirements, the model was built in Golang programming language (Google Inc, Mountain View, CA). Model code is publicly available via <https://github.com/alexgoodell/go-mdism> or can be acquired through the corresponding author. Sensitivity analyses were conducted using a 20-machine cluster (Amazon Web Services, Seattle, WA). Outcome analysis was completed in Excel 2010 (Microsoft, Redmond, WA).

## Results

### Incidence and mortality

The incidence of T2D, CHD, and HCC and the corresponding death rates in the year 2035 are stated in **table 3**. Diabetes incidence is expected to rise over the next 20 years, resulting in an incidence rate of 1035 cases per 100,000 people. The interventions are expected to reduce this by 19.9 and 83.5 respectively. CHD incidence is expected to rise to 665 cases per 100,000 people by 2035. This can be reduced by 9.4 and 39 cases by the 20% and the 50% intervention respectively. NASH- or cirrhosis-related HCC incidence will rise to 4.4 cases per 100,000 people. Interventions could reduce this amount by 0.3 and 1.3 respectively. Liver death can be due to HCC, or it can be related to NASH or cirrhosis in the absence of HCC. Liver-related deaths will rise substantially, to 19.8 deaths per 100,000 people by 2035. This can be reduced by 1.4 or 5.8 deaths per 100,000 people by the 20% and 50% intervention, respectively.

**Table 3.** Annual occurring and averted events in 2035

| Per 100,000 people |                        |                        |                  |                     |                  |
|--------------------|------------------------|------------------------|------------------|---------------------|------------------|
| Events             | No intervention (CI)   | 20% red. (CI)          | Difference (CI)  | 50% red. (CI)       | Difference (CI)  |
| T2D cases          | 1034.6 (1031.0-1038.2) | 1014.7 (1011.3-1018.2) | 19.9 (12.8-27.0) | 951.2 (947.9-954.4) | 83.5 (76.7-90.3) |
| T2D deaths         | 576.6 (574.2-578.9)    | 569.3 (567.0-571.6)    | 7.2 (2.7-11.8)   | 546.4 (544.2-548.6) | 30.2 (25.7-34.6) |
| CHD cases          | 665.1 (661.9-668.2)    | 655.6 (652.5-658.8)    | 9.4 (3.1-15.8)   | 626.1 (623.1-629.1) | 39.0 (32.8-45.2) |
| CHD deaths         | 203.6 (202.2-205.0)    | 201.9 (200.5-203.3)    | 1.6 (-1.2-4.4)   | 197.2 (195.9-198.6) | 6.3 (3.6-9.1)    |
| HCC cases          | 4.4 (4.32-4.41)        | 4.0 (3.95-4.05)        | 0.3 (0.24-0.39)  | 3.1 (3.02-3.18)     | 1.3 (1.24-1.38)  |
| Liver deaths       | 19.8 (19.65-20.02)     | 18.5 (18.29-18.63)     | 1.4 (1.02-1.73)  | 14.1 (13.94-14.21)  | 5.8 (5.44-6.08)  |

NASH: non-alcoholic steatohepatitis; HCC: hepatocellular carcinoma; CHD: coronary heart disease; T2D: type 2 diabetes mellitus; CI: 95% central coverage interval. Numbers might not add up due to rounding.

### Prevalence

**Figure 2**, graphs A-H show the reduction in prevalence of disease due to the two intervention strategies. A 20% reduction in added sugars consumption is expected to decrease prevalence of each disease state significantly after 20 years, except for overweight prevalence, which does not change significantly. A 50% reduction in added sugars consumption will proportionally affect prevalence. Effects on T2D and CHD prevalences start to accumulate after an initial 3-year lag period. Graph G shows that overweight prevalence is not reduced. This is because the individuals that regressed from obese to overweight offset the reduction achieved in people that started overweight and regressed to normal weight. This effect is clarified by the drop in obesity prevalence.

### Figure 2

#### Costs & DALYs

An overview of economic findings is presented in **table 4**. Overall costs for the modeled disease states could be reduced by 2.26% (95% CI 2.23% — 2.29%) by the year 2035 with an intervention that reduces added sugars intake by 20%. The 50% intervention will reduce overall costs by 6.99% (95% CI: 6.91 — 7.08). DALY burden and averted DALYs are presented in **table 5**. Total amount of DALYs could be reduced by 4.32% (95% CI: 4.27% — 4.38%) or 13.37% (95% CI: 13.24% — 13.51%) respectively. The majority of averted DALYs are due to reduced mortality.

**Table 4.** Annual costs spent and averted per disease state in 2035

| In billions 2015 USD, discounted by 3.0% annually |                            |                            |                         |                            |                         |
|---------------------------------------------------|----------------------------|----------------------------|-------------------------|----------------------------|-------------------------|
| State                                             | No intervention (CI)       | 20% reduction (CI)         | Difference (CI)         | 50% reduction (CI)         | Difference (CI)         |
| Steatosis                                         | 6.48 (6.43-6.53)           | 6.40 (6.35-6.45)           | 0.08 (0.080-0.082)      | 6.23 (6.18-6.28)           | 0.25 (0.248-0.255)      |
| NASH                                              | 5.26 (5.22-5.30)           | 4.89 (4.85-4.93)           | 0.37 (0.368-0.375)      | 4.11 (4.08-4.14)           | 1.15 (1.139-1.162)      |
| Cirrhosis                                         | 7.00 (6.93-7.07)           | 6.22 (6.16-6.28)           | 0.78 (0.772-0.791)      | 4.60 (4.56-4.65)           | 2.40 (2.371-2.429)      |
| HCC                                               | 5.10 (5.04-5.16)           | 4.55 (4.50-4.60)           | 0.55 (0.537-0.558)      | 3.40 (3.36-3.44)           | 1.70 (1.669-1.721)      |
| CHD                                               | 162.2 (160.9-163.6)        | 160.1 (158.8-161.5)        | 2.09 (2.06-2.12)        | 155.7 (154.4-157.0)        | 6.51 (6.43-6.58)        |
| T2D                                               | 200.0 (198.4-201.6)        | 195.9 (194.3-197.5)        | 4.07 (4.02-4.12)        | 187.4 (185.9-188.9)        | 12.59 (12.46-12.73)     |
| Overweight                                        | 16.4 (16.3-16.5)           | 16.6 (16.5-16.8)           | -0.25 (-0.26 - -0.25)   | 17.2 (17.1-17.3)           | -0.79 (-0.81 - -0.78)   |
| Obesity                                           | 52.7 (52.3-53.1)           | 50.1 (49.7-50.5)           | 2.59 (2.57-2.62)        | 44.7 (44.3-45.0)           | 8.03 (7.95-8.12)        |
| <b>Total</b>                                      | <b>455.1 (451.4-458.9)</b> | <b>444.9 (441.2-448.5)</b> | <b>10.3 (10.2-10.4)</b> | <b>423.3 (419.8-426.8)</b> | <b>31.8 (31.5-32.2)</b> |

NASH: non-alcoholic steatohepatitis; HCC: hepatocellular carcinoma; CHD: coronary heart disease; T2D: type 2 diabetes mellitus; CI: 95% central coverage interval. Numbers might not add up due to rounding.

**Table 5.** Annual occurring and averted DALYs in 2035

| In millions    |                            |                            |                            |                            |                            |
|----------------|----------------------------|----------------------------|----------------------------|----------------------------|----------------------------|
| State          | No intervention (CI)       | 20% reduction (CI)         | Difference (CI)            | 50% reduction (CI)         | Difference (CI)            |
| NASH           | 2.97 (2.955-2.988)         | 2.76 (2.746-2.777)         | 0.210 (0.209-0.212)        | 2.32 (2.309-2.334)         | 0.650 (0.645-0.655)        |
| Cirrhosis      | 0.48 (0.475-0.482)         | 0.42 (0.422-0.428)         | 0.053 (0.053-0.054)        | 0.31 (0.312-0.316)         | 0.164 (0.162-0.165)        |
| HCC            | 3.06 (3.046-3.084)         | 2.78 (2.765-2.799)         | 0.283 (0.279-0.283)        | 2.19 (2.180-2.206)         | 0.872 (0.863-0.881)        |
| CHD            | 2.32 (2.305-2.330)         | 2.29 (2.276-2.302)         | 0.028 (0.028-0.029)        | 2.23 (2.217-2.242)         | 0.088 (0.086-0.090)        |
| T2D            | 8.21 (8.180-8.248)         | 8.06 (8.023-8.089)         | 0.158 (0.155-0.160)        | 7.72 (7.690-7.752)         | 0.492 (0.487-0.498)        |
| Obesity        | 0.69 (0.689-0.700)         | 0.66 (0.655-0.666)         | 0.034 (0.034-0.035)        | 0.59 (0.584-0.593)         | 0.106 (0.105-0.107)        |
| <b>Total</b>   | <b>17.74 (17.65-17.83)</b> | <b>16.97 (16.89-17.06)</b> | <b>0.767 (0.757-0.777)</b> | <b>15.37 (15.29-15.44)</b> | <b>2.372 (2.348-2.396)</b> |
| From mortality | 11.94                      | 11.50                      | 0.439                      | 10.58                      | 1.357                      |
| From morbidity | 5.80                       | 5.47                       | 0.328                      | 4.78                       | 1.015                      |

NASH: non-alcoholic steatohepatitis; HCC: hepatocellular carcinoma; CHD: coronary heart disease; T2D: type 2 diabetes mellitus; CI: 95% central coverage interval. Numbers might not add up due to rounding.

#### Sensitivity analyses

We show tornado diagrams for the two most important outcomes: annual costs and DALYs averted by the year 2035 due to an intervention that reduces sugar consumption by 20%. The diagrams show the impact that specific input parameters had on selected results. The ten variables that caused the widest range in results are shown. When varying individual variables, the annual savings by the year 2035 range from 7.9 to 17.1 billion 2015 USD. The tornado diagram (**Figure 3**) shows that the interaction between high added sugars consumption and the progression within the NAFLD and BMI chains had the greatest impact on total costs averted. In the tornado diagram for total annual DALYs averted by the 20% intervention in the year 2035 (**Figure 4**), assigned disability weights had the greatest impact. Total DALYs averted ranged between 0.36 and 1.41 million.

Figure 3 and 4

### Discussion

It has been estimated that the cost burden of the diseases of metabolic syndrome are 75% of the total annual health care budget (\$3.2 trillion) of the United States. The clinical burden of NAFLD alone is estimated at \$103 billion.(153) The proposed model shows clear and significant benefits for interventions that reduce consumption of added sugars. A reduction by 20% will reduce annual direct medical costs for U.S. adults by more than 10 billion USD (2015 dollars) by the year 2035. A 50% reduction will save an additional 21 billion. Together with these economic benefits, population health will significantly improve. A total of 770,000 DALYs could be averted with a 20% reduction in consumption. A 50% reduction in consumption will avert another 1.6 million DALYs. These health and economic benefits are the direct result of lower incidence, prevalence, and mortality of disease in U.S. adults due to lower consumption of added sugars.

#### *Fit with current knowledge*

The estimate for health and economic benefit of this model is similar to a number of previously performed economic evaluations. Basu et al. found a reduction in diabetes incidence of 21.7 cases per 100,000 people with a reduction of 20% of added sugars through a cap and trade approach, limiting the amount of sugars in the food supply.(63) We found a reduction of 19.9 cases per 100,000 people, indicating a similar absolute effect size. CHD incidence reduction is estimated to be about 1.5-fold higher than found in a similar study, but we argue that this is mainly because the other study simulated a 20% tax on sugar-sweetened beverages, and therefore the overall added sugars consumption reduction was smaller than the 20% reduction we simulated.(61) In an econometric analysis looking backward in time, Basu et al. found a delay of 3 years between changes in sugar consumption and prevalence of diabetes.(35) Similarly, we found a delay of 3 years going forward in time between reduction of consumption and reduction in prevalence of disease. Prevalence of obesity has been reported to drop by 1.5% — 10% due to a reduction of added sugars by 10% — 20%.(57–59) Our result of 2.1% reduction in obesity prevalence seems to reflect our conservative approach in determining input parameter values.

Costs savings are bigger in our model compared to other models.(58,62,62) This was for three reasons. First, some other models do not use added sugars as a whole but use SSB's, resulting in a smaller effect. Second, our overall prevalence of T2D and CHD is higher than most other models. We have calibrated our model to historic trends reported by the CDC and to future projections of the AHA, ADA and separate studies predicting future prevalence, and therefore argue that our estimate is valid. Third, and perhaps most importantly, no other studies predict future NAFLD prevalence. We present the first model that estimates the effects of sugar interventions on NAFLD prevalence and associated costs and DALYs.

In 2009, the American Heart Association recommended a reduction in added sugar consumption from a median of 90 grams per day to a maximum of 25 grams for women and 37.5 grams for men.(32) In 2016, the USDA and WHO settled on an upper limit of 10% of calories, which approximates 50 grams per day. Given the U.S. current median consumption of 80 grams per day, our microsimulation modeling cutoffs of 20% and 50%, while ambitious, are metabolically rational and in concert with governmental goals.(154)

Our model only allows us to examine the negative side of the balance sheet in terms of cost savings to health care. However, reductions in added sugar consumption have been modeled to provide significant increases to the positive side of the balance sheet in terms of economic productivity. Indeed, a simulation modeling by Morgan Stanley predicted economic growth to decline to zero by the year 2035 using a high-sugar case, whereas stabilization at +2.9% was noted with a low-sugar case.(155)

#### *Strengths and limitations*

This study is the first of its kind to model the effect of added sugars on NAFLD as well as on BMI, and therefore it captures a more complete picture of the possible health and economic benefits of interventions that reduce intake of added sugars. Though taxing sugar-sweetened products, mainly beverages, has been widely suggested as a public health strategy, other approaches, e.g. a cap and trade approach, have also been suggested.(56–59,61–63) We have constructed this model to be applicable with each of these interventions, so that it does not rely on any consumption statistics other than added sugars as a whole. A limitation to this approach is that our model does not incorporate a possible change to non-sugared caloric products, containing protein, fat, or other carbohydrates. While it is conceivable that removal of added sugars in the diet could result in subsequent substitution of other foodstuffs to restore an individual's caloric baseline, *ad lib* population studies do not support that such caloric compensation takes place.(156) It is important that effort is put into investigating self- and cross-elasticity of sugar-sweetened products to determine the effect of these caloric replacements. Though this is a limitation, research has clearly shown that the contribution of added sugars in relation to their excessive intake is likely the most important consumption factor for metabolic derangement. Furthermore, added sugars consumption was fixed throughout the simulation for each individual (though specified per sex and ethnic group). We could not find sufficient data on changes in sugar consumption related to incident disease and therefore could not model these changes accurately enough. We argue that keeping the sugar consumption fixed is likely more accurate than modeling changing sugar consumption based solely on age. The main limitation of this model is the uncertainty of input parameters. The

1  
2  
3 pathophysiology of NAFLD and its associations with other metabolic diseases is still widely under investigation. We have  
4 modeled cirrhosis as an irreversible condition, which is not necessarily true in all cases. Furthermore, the input parameters  
5 for baseline transition probabilities and interaction (OR) values are still somewhat uncertain. Many studies report  
6 associations, but very few studies report plausible quantitative causal relationships. There are several reasons that explain  
7 this low number of studies. First, it is hard to accurately determine the individual components in an individual's diet.  
8 Second, there is no inexpensive, accurate way to determine the presence of individual NAFLD states. Commonly used  
9 ultrasonography possibly underestimates the prevalence of NAFLD and does not differentiate between steatosis and NASH,  
10 while up to 79% of patients may have serum alanine aminotransferase (ALT) levels within the normal reference range of <  
11 40 U/mL.<sup>(9,157)</sup> We have addressed this uncertainty by taking wide ranges in the probabilistic sensitivity analysis, which  
12 determines the SD and 95% central coverage interval around the results. Results remain statistically significant, indicating  
13 that any minor inaccuracies in input parameter values will not render the effects insignificant. Ultimately, it is desirable to  
14 determine incidence of NAFLD states and risk factor relative risks in independent prospective cohort studies, and to assess  
15 intervention effectiveness via randomized controlled trials. This model can be refined and updated when new data become  
16 available.

16 It is possible that our results might still underestimate the total effects. We only modeled diagnosed disease, we took a  
17 conservative approach when determining input parameter values, and we did not take societal costs into account. Real  
18 health, healthcare, and economic benefits are likely larger than estimated. Furthermore, we only modeled the population  
19 with an age over 20. Likely, including health effects in children, particularly those with type 2 diabetes, would yield  
20 additional benefits.

#### 21 *Implications*

22 This model clarifies the significant health and economic benefits that could be achieved by a public health intervention that  
23 reduces consumption of added sugars in U.S. adults. We recommend that health policy makers review options to  
24 implement sugar reduction. Important to consider are the barriers to limiting added sugars in the United States. The food  
25 industry uses sugar to enhance flavor and as a bulking and browning agent, humectant, and spoilage retardant. Another  
26 obstacle is the lowered price for manufacturing, due to government subsidies for corn, cane, and beets. Historically there  
27 was another barrier -- lack of consensus on the link between sugar and metabolic disease. However, consensus on causality  
28 is now strong. Recently sugar taxation has emerged as a viable strategy, levied in the U.K. and Mexico, as well as several  
29 municipalities in the U.S., including San Francisco, Oakland, Berkeley, and Albany, CA, as well as Chicago, IL and  
30 Philadelphia, PA.

#### 31 *Future research*

32 Future research should focus on establishing a more precise measurement of NAFLD prevalence, incidence, and risk factors.  
33 Furthermore, magnitude and effects of switching to different food groups should be assessed. Finally, changes in added  
34 sugars consumption related to ageing and incident disease should be more intensively investigated.

#### 35 **Contributor statement**

36 RAV was involved in conceptualizing the study, reviewing literature, conducting the modelling analysis, analyzing the data  
37 and writing the manuscript. AJG was involved in conducting the modelling analysis and in editing the paper. LAR and RHL  
38 were involved in conceptualizing the model, providing and structuring data inputs and editing the manuscript. TCP was  
39 involved in reviewing and revising the manuscript, checking statistical and mathematical assumptions and establishing  
40 overall validity of the model. JGK was involved in conceptualization of the model, input data review, guiding the modelling  
41 process and providing a critical review of the manuscript. All authors read and approved the final manuscript.

#### 42 **Competing interests**

43 The authors declare no direct conflicts of interest. However, Dr. Lustig has received author fees from Hudson Street Press  
44 regarding his authorship of: "Fat Chance: Beating the Odds Against Sugar, Processed Food, Obesity, and Disease"; "The Fat  
45 Chance Cookbook"; and "Sugar has 56 names: A Shopper's Guide". He is also the unpaid chief science officer of the non-  
46 profit EatREAL.

#### 47 **Financial support**

48 No financial support was provided for this study.

#### 49 **Data sharing statement**

50 An online supplement will be made available containing comprehensive tables of used input data. The modelling code is  
51 available through github: <https://github.com/alexgoodell/go-mdism> or can be accessed via the corresponding author.

#### 52 **References**

- 53  
54  
55 1. Flegal KM, Kruszon-Moran D, Carroll MD, Fryar CD, Ogden CL. Trends in Obesity Among Adults in the United States, 2005 to 2014.  
56 JAMA. 2016 Jun 7;315(21):2284–91.

- 1
  - 2
  - 3
  - 4
  - 5
  - 6
  - 7
  - 8
  - 9
  - 10
  - 11
  - 12
  - 13
  - 14
  - 15
  - 16
  - 17
  - 18
  - 19
  - 20
  - 21
  - 22
  - 23
  - 24
  - 25
  - 26
  - 27
  - 28
  - 29
  - 30
  - 31
  - 32
  - 33
  - 34
  - 35
  - 36
  - 37
  - 38
  - 39
  - 40
  - 41
  - 42
  - 43
  - 44
  - 45
  - 46
  - 47
  - 48
  - 49
  - 50
  - 51
  - 52
  - 53
  - 54
  - 55
  - 56
  - 57
  - 58
  - 59
  - 60
2. Centers for Disease Control and Prevention. National Center for Health Statistics. Health Data Interactive. Accessed at [www.cdc.gov/nchs/hdi.htm](http://www.cdc.gov/nchs/hdi.htm) on Apr 23, 2015.
  3. Centers for Disease Control and Prevention. National Center for Health Statistics. National Health and Nutrition Examination Survey Data. Hyattsville, MD: U.S. Department of Health and Human Services, Centers for Disease Control and Prevention. 2005-2012. <http://www.cdc.gov/nchs/nhanes.htm>.
  4. American Heart Association. Heart Disease and Stroke Statistics — 2005 Update. Dallas, Texas.: American Heart Association; 2005.
  5. Mozaffarian D, Benjamin EJ, Go AS, Arnett DK, Blaha MJ, Cushman M, et al. Heart disease and stroke statistics--2015 update: a report from the American Heart Association. *Circulation*. 2015 Jan 27;131(4):e29-322.
  6. Centers for Disease Control and Prevention. National Center for Health Statistics. Underlying Cause of Death 1999-2013 on CDC WONDER Online Database, released 2015. Data are from the Multiple Cause of Death Files, 1999-2013, as compiled from data provided by the 57 vital statistics jurisdictions through the Vital Statistics Cooperative Program. Accessed at <http://wonder.cdc.gov/ucd-icd10.html> on Apr 16, 2015.
  7. Heidenreich PA, Trogon JG, Khavjou OA, Butler J, Dracup K, Ezekowitz MD, et al. Forecasting the future of cardiovascular disease in the United States: a policy statement from the American Heart Association. *Circulation*. 2011 Mar 1;123(8):933-44.
  8. American Diabetes Association. Economic costs of diabetes in the U.S. In 2007. *Diabetes Care*. 2008 Mar;31(3):596-615.
  9. Browning JD, Szczepaniak LS, Dobbins R, Nuremberg P, Horton JD, Cohen JC, et al. Prevalence of hepatic steatosis in an urban population in the United States: impact of ethnicity. *Hepatology*. 2004 Dec;40(6):1387-95.
  10. Yki-Järvinen H. Non-alcoholic fatty liver disease as a cause and a consequence of metabolic syndrome. *Lancet Diabetes Endocrinol*. 2014 Nov;2(11):901-10.
  11. Lonardo A, Ballestri S, Marchesini G, Angulo P, Loria P. Nonalcoholic fatty liver disease: a precursor of the metabolic syndrome. *Dig Liver Dis Off J Ital Soc Gastroenterol Ital Assoc Study Liver*. 2015 Mar;47(3):181-90.
  12. Ballestri S, Nascimbeni F, Romagnoli D, Lonardo A. The independent predictors of non-alcoholic steatohepatitis and its individual histological features.: Insulin resistance, serum uric acid, metabolic syndrome, alanine aminotransferase and serum total cholesterol are a clue to pathogenesis and candidate targets for treatment. *Hepatology*. 2016 Oct;46(11):1074-87.
  13. Chalasani N, Younossi Z, Lavine JE, Diehl AM, Brunt EM, Cusi K, et al. The diagnosis and management of non-alcoholic fatty liver disease: practice guideline by the American Gastroenterological Association, American Association for the Study of Liver Diseases, and American College of Gastroenterology. *Gastroenterology*. 2012 Jun;142(7):1592-609.
  14. Tiniakos DG. Nonalcoholic fatty liver disease/nonalcoholic steatohepatitis: histological diagnostic criteria and scoring systems. *Eur J Gastroenterol Hepatol*. 2010 Jun;22(6):643-50.
  15. Farazi PA, DePinho RA. Hepatocellular carcinoma pathogenesis: from genes to environment. *Nat Rev Cancer*. 2006 Sep;6(9):674-87.
  16. Wree A, Broderick L, Canbay A, Hoffman HM, Feldstein AE. From NAFLD to NASH to cirrhosis-new insights into disease mechanisms. *Nat Rev Gastroenterol Hepatol*. 2013 Nov;10(11):627-36.
  17. Mahady SE, George J. Management of nonalcoholic steatohepatitis: an evidence-based approach. *Clin Liver Dis*. 2012 Aug;16(3):631-45.
  18. Review Team, LaBrecque DR, Abbas Z, Anania F, Ferenci P, Khan AG, et al. World Gastroenterology Organisation global guidelines: Nonalcoholic fatty liver disease and nonalcoholic steatohepatitis. *J Clin Gastroenterol*. 2014 Jul;48(6):467-73.
  19. Williams CD, Stengel J, Asike MI, Torres DM, Shaw J, Contreras M, et al. Prevalence of nonalcoholic fatty liver disease and nonalcoholic steatohepatitis among a largely middle-aged population utilizing ultrasound and liver biopsy: a prospective study. *Gastroenterology*. 2011 Jan;140(1):124-31.
  20. Peery AF, Dellon ES, Lund J, Crockett SD, McGowan CE, Bulsiewicz WJ, et al. Burden of gastrointestinal disease in the United States: 2012 update. *Gastroenterology*. 2012 Nov;143(5):1179-1187.e1-3.
  21. Gastaldelli A, Cusi K, Pettiti M, Hardies J, Miyazaki Y, Berria R, et al. Relationship between hepatic/visceral fat and hepatic insulin resistance in nondiabetic and type 2 diabetic subjects. *Gastroenterology*. 2007 Aug;133(2):496-506.

- 1
  - 2
  - 3
  - 4
  - 5
  - 6
  - 7
  - 8
  - 9
  - 10
  - 11
  - 12
  - 13
  - 14
  - 15
  - 16
  - 17
  - 18
  - 19
  - 20
  - 21
  - 22
  - 23
  - 24
  - 25
  - 26
  - 27
  - 28
  - 29
  - 30
  - 31
  - 32
  - 33
  - 34
  - 35
  - 36
  - 37
  - 38
  - 39
  - 40
  - 41
  - 42
  - 43
  - 44
  - 45
  - 46
  - 47
  - 48
  - 49
  - 50
  - 51
  - 52
  - 53
  - 54
  - 55
  - 56
  - 57
  - 58
  - 59
  - 60
22. Dietrich P, Hellerbrand C. Non-alcoholic fatty liver disease, obesity and the metabolic syndrome. *Best Pract Res Clin Gastroenterol*. 2014 Aug;28(4):637–53.
23. Fukuda T, Hamaguchi M, Kojima T, Hashimoto Y, Ohbora A, Kato T, et al. The impact of non-alcoholic fatty liver disease on incident type 2 diabetes mellitus in non-overweight individuals. *Liver Int Off J Int Assoc Study Liver*. 2016 Feb;36(2):275–83.
24. Sattar N, McConnachie A, Ford I, Gaw A, Cleland SJ, Forouhi NG, et al. Serial metabolic measurements and conversion to type 2 diabetes in the west of Scotland coronary prevention study: specific elevations in alanine aminotransferase and triglycerides suggest hepatic fat accumulation as a potential contributing factor. *Diabetes*. 2007 Apr;56(4):984–91.
25. Thomas EL, Brynes AE, Hamilton G, Patel N, Spong A, Goldin RD, et al. Effect of nutritional counselling on hepatic, muscle and adipose tissue fat content and distribution in non-alcoholic fatty liver disease. *World J Gastroenterol*. 2006 Sep 28;12(36):5813–9.
26. Vanni E, Bugianesi E, Kotronen A, De Minicis S, Yki-Järvinen H, Svegliati-Baroni G. From the metabolic syndrome to NAFLD or vice versa? *Dig Liver Dis Off J Ital Soc Gastroenterol Ital Assoc Study Liver*. 2010 May;42(5):320–30.
27. Larson-Meyer DE, Heilbronn LK, Redman LM, Newcomer BR, Frisard MI, Anton S, et al. Effect of calorie restriction with or without exercise on insulin sensitivity, beta-cell function, fat cell size, and ectopic lipid in overweight subjects. *Diabetes Care*. 2006 Jun;29(6):1337–44.
28. Marriott BP, Cole N, Lee E. National estimates of dietary fructose intake increased from 1977 to 2004 in the United States. *J Nutr*. 2009 Jun;139(6):1228S–1235S.
29. Wang DD, Leung CW, Li Y, Ding EL, Chiuve SE, Hu FB, et al. Trends in dietary quality among adults in the United States, 1999 through 2010. *JAMA Intern Med*. 2014 Oct;174(10):1587–95.
30. Welsh JA, Sharma AJ, Grellinger L, Vos MB. Consumption of added sugars is decreasing in the United States. *Am J Clin Nutr*. 2011 Sep;94(3):726–34.
31. Rodriguez LA, Madsen KA, Cotterman C, Lustig RH. Added sugar intake and metabolic syndrome in US adolescents: cross-sectional analysis of the National Health and Nutrition Examination Survey 2005–2012. *Public Health Nutr*. 2016 Sep;19(13):2424–34.
32. Johnson RK, Appel LJ, Brands M, Howard BV, Lefevre M, Lustig RH, et al. Dietary sugars intake and cardiovascular health: a scientific statement from the American Heart Association. *Circulation*. 2009 Sep 15;120(11):1011–20.
33. EFSA Panel on Dietetic Products N and Allergies (NDA). Scientific Opinion on Dietary Reference Values for carbohydrates and dietary fibre. *EFSA J*. 2010 Mar 1;8(3):1462.
34. Yang Q, Zhang Z, Gregg EW, Flanders WD, Merritt R, Hu FB. Added sugar intake and cardiovascular diseases mortality among US adults. *JAMA Intern Med*. 2014 Apr;174(4):516–24.
35. Basu S, Yoffe P, Hills N, Lustig RH. The relationship of sugar to population-level diabetes prevalence: an econometric analysis of repeated cross-sectional data. *PLoS One*. 2013;8(2):e57873.
36. Abid A, Taha O, Nseir W, Farah R, Grosovski M, Assy N. Soft drink consumption is associated with fatty liver disease independent of metabolic syndrome. *J Hepatol*. 2009 Nov;51(5):918–24.
37. Lustig RH. Fructose: it's "alcohol without the buzz." *Adv Nutr Bethesda Md*. 2013 Mar 1;4(2):226–35.
38. Lustig RH, Mulligan K, Noworolski SM, Tai VW, Wen MJ, Erkin-Cakmak A, et al. Isocaloric fructose restriction and metabolic improvement in children with obesity and metabolic syndrome. *Obes Silver Spring Md*. 2016 Feb;24(2):453–60.
39. Schwarz J-M, Noworolski SM, Wen MJ, Dyachenko A, Prior JL, Weinberg ME, et al. Effect of a High-Fructose Weight-Maintaining Diet on Lipogenesis and Liver Fat. *J Clin Endocrinol Metab*. 2015 Jun;100(6):2434–42.
40. Imamura F, O'Connor L, Ye Z, Mursu J, Hayashino Y, Bhupathiraju SN, et al. Consumption of sugar sweetened beverages, artificially sweetened beverages, and fruit juice and incidence of type 2 diabetes: systematic review, meta-analysis, and estimation of population attributable fraction. *BMJ*. 2015 Jul 21;351:h3576.
41. Bray GA, Popkin BM. Dietary sugar and body weight: have we reached a crisis in the epidemic of obesity and diabetes?: health be damned! Pour on the sugar. *Diabetes Care*. 2014 Apr;37(4):950–6.
42. Lim JS, Mietus-Snyder M, Valente A, Schwarz J-M, Lustig RH. The role of fructose in the pathogenesis of NAFLD and the metabolic syndrome. *Nat Rev Gastroenterol Hepatol*. 2010 May;7(5):251–64.

- 1
  - 2
  - 3
  - 4
  - 5
  - 6
  - 7
  - 8
  - 9
  - 10
  - 11
  - 12
  - 13
  - 14
  - 15
  - 16
  - 17
  - 18
  - 19
  - 20
  - 21
  - 22
  - 23
  - 24
  - 25
  - 26
  - 27
  - 28
  - 29
  - 30
  - 31
  - 32
  - 33
  - 34
  - 35
  - 36
  - 37
  - 38
  - 39
  - 40
  - 41
  - 42
  - 43
  - 44
  - 45
  - 46
  - 47
  - 48
  - 49
  - 50
  - 51
  - 52
  - 53
  - 54
  - 55
  - 56
  - 57
  - 58
  - 59
  - 60
43. Maersk M, Belza A, Stødkilde-Jørgensen H, Ringgaard S, Chabanova E, Thomsen H, et al. Sucrose-sweetened beverages increase fat storage in the liver, muscle, and visceral fat depot: a 6-mo randomized intervention study. *Am J Clin Nutr.* 2012 Feb;95(2):283–9.
44. Stanhope KL, Schwarz JM, Keim NL, Griffen SC, Bremer AA, Graham JL, et al. Consuming fructose-sweetened, not glucose-sweetened, beverages increases visceral adiposity and lipids and decreases insulin sensitivity in overweight/obese humans. *J Clin Invest.* 2009 May;119(5):1322–34.
45. Pollock NK, Bundy V, Kanto W, Davis CL, Bernard PJ, Zhu H, et al. Greater fructose consumption is associated with cardiometabolic risk markers and visceral adiposity in adolescents. *J Nutr.* 2012 Feb;142(2):251–7.
46. Sevastianova K, Santos A, Kotronen A, Hakkarainen A, Makkonen J, Silander K, et al. Effect of short-term carbohydrate overfeeding and long-term weight loss on liver fat in overweight humans. *Am J Clin Nutr.* 2012 Oct;96(4):727–34.
47. Nguyen S, Choi HK, Lustig RH, Hsu C. Sugar-sweetened beverages, serum uric acid, and blood pressure in adolescents. *J Pediatr.* 2009 Jun;154(6):807–13.
48. Chen L, Caballero B, Mitchell DC, Loria C, Lin P-H, Champagne CM, et al. Reducing consumption of sugar-sweetened beverages is associated with reduced blood pressure: a prospective study among United States adults. *Circulation.* 2010 Jun 8;121(22):2398–406.
49. InterAct Consortium, Romaguera D, Norat T, Wark PA, Vergnaud AC, Schulze MB, et al. Consumption of sweet beverages and type 2 diabetes incidence in European adults: results from EPIC-InterAct. *Diabetologia.* 2013 Jul;56(7):1520–30.
50. Ballestri S, Zona S, Targher G, Romagnoli D, Baldelli E, Nascimbeni F, et al. Nonalcoholic fatty liver disease is associated with an almost twofold increased risk of incident type 2 diabetes and metabolic syndrome. Evidence from a systematic review and meta-analysis. *J Gastroenterol Hepatol.* 2016 May;31(5):936–44.
51. Gugliucci A, Lustig RH, Caccavello R, Erkin-Cakmak A, Noworolski SM, Tai VW, et al. Short-term isocaloric fructose restriction lowers apoC-III levels and yields less atherogenic lipoprotein profiles in children with obesity and metabolic syndrome. *Atherosclerosis.* 2016 Oct;253:171–7.
52. Lustig, R.H., Wen, M., Pan, K., Tai, V., Erkin-Cakmak, A., Gugliucci, A., Mulligan, K., Schwarz, J.M., and Noworolski, S.M. (2015). Reduction of fatty liver after short-term isocaloric fructose restriction in children with metabolic syndrome correlates with improvement in insulin dynamics. In Obesity Society (Los Angeles). Manuscript currently being revised to submit for second time to Gastroenterology.
53. Perry RJ, Samuel VT, Petersen KF, Shulman GI. The role of hepatic lipids in hepatic insulin resistance and type 2 diabetes. *Nature.* 2014 Jun 5;510(7503):84–91.
54. Templeman NM, Skovsø S, Page MM, Lim GE, Johnson JD. A causal role for hyperinsulinemia in obesity. *J Endocrinol.* 2017 Mar;232(3):R173–83.
55. Jia G, DeMarco VG, Sowers JR. Insulin resistance and hyperinsulinaemia in diabetic cardiomyopathy. *Nat Rev Endocrinol.* 2016 Mar;12(3):144–53.
56. Brownell KD, Farley T, Willett WC, Popkin BM, Chaloupka FJ, Thompson JW, et al. The public health and economic benefits of taxing sugar-sweetened beverages. *N Engl J Med.* 2009 Oct 15;361(16):1599–605.
57. Mytton OT, Eyles H, Ogilvie D. Evaluating the Health Impacts of Food and Beverage Taxes. *Curr Obes Rep.* 2014 Dec;3(4):432–9.
58. Wang YC, Coxson P, Shen Y-M, Goldman L, Bibbins-Domingo K. A penny-per-ounce tax on sugar-sweetened beverages would cut health and cost burdens of diabetes. *Health Aff Proj Hope.* 2012 Jan;31(1):199–207.
59. Smith TA, Lin B, Lee J. Taxing Caloric Sweetened Beverages: Potential Effects on Beverage Consumption, Calorie Intake, and Obesity, ERR-100, U.S. Department of Agriculture, Economic Research Service, July 2010.
60. Cochero MA, Rivera-Dommarco J, Popkin BM, Ng SW. In Mexico, Evidence Of Sustained Consumer Response Two Years After Implementing A Sugar-Sweetened Beverage Tax. *Health Aff Proj Hope.* 2017 Mar 1;36(3):564–71.
61. Mekonnen TA, Odden MC, Coxson PG, Guzman D, Lightwood J, Wang YC, et al. Health benefits of reducing sugar-sweetened beverage intake in high risk populations of California: results from the cardiovascular disease (CVD) policy model. *PLoS One.* 2013;8(12):e81723.
62. Basu S, Seligman HK, Gardner C, Bhattacharya J. Ending SNAP subsidies for sugar-sweetened beverages could reduce obesity and type 2 diabetes. *Health Aff Proj Hope.* 2014 Jun;33(6):1032–9.

- 1
  - 2
  - 3
  - 4
  - 5
  - 6
  - 7
  - 8
  - 9
  - 10
  - 11
  - 12
  - 13
  - 14
  - 15
  - 16
  - 17
  - 18
  - 19
  - 20
  - 21
  - 22
  - 23
  - 24
  - 25
  - 26
  - 27
  - 28
  - 29
  - 30
  - 31
  - 32
  - 33
  - 34
  - 35
  - 36
  - 37
  - 38
  - 39
  - 40
  - 41
  - 42
  - 43
  - 44
  - 45
  - 46
  - 47
  - 48
  - 49
  - 50
  - 51
  - 52
  - 53
  - 54
  - 55
  - 56
  - 57
  - 58
  - 59
  - 60
63. Basu S, Lewis K. Reducing added sugars in the food supply through a cap-and-trade approach. *Am J Public Health*. 2014 Dec;104(12):2432–8.
64. Caro JJ, Briggs AH, Siebert U, Kuntz KM, ISPOR-SMDM Modeling Good Research Practices Task Force. Modeling good research practices—overview: a report of the ISPOR-SMDM Modeling Good Research Practices Task Force--1. *Value Health J Int Soc Pharmacoeconomics Outcomes Res*. 2012 Oct;15(6):796–803.
65. Husereau D, Drummond M, Petrou S, Carswell C, Moher D, Greenberg D, et al. Consolidated Health Economic Evaluation Reporting Standards (CHEERS)—Explanation and Elaboration: A Report of the ISPOR Health Economic Evaluation Publication Guidelines Good Reporting Practices Task Force. *Value Health*. 2013 Mar;16(2):231–50.
66. Stewart WJ. *Introduction to the Numerical Solution of Markov Chains*. 1st ed. Princeton: Princeton University Press; 1994.
67. U.S. Census Bureau, Population Division. Table 9: Projections of the Population by Sex and Age for the United States: 2015 to 2060 (NP2014-T9). 2014. Accessed on <http://www.census.gov/population/projections/> at Apr 23, 2015.
68. Geiss LS, Wang J, Cheng YJ, Thompson TJ, Barker L, Li Y, et al. Prevalence and incidence trends for diagnosed diabetes among adults aged 20 to 79 years, United States, 1980-2012. *JAMA*. 2014 Sep 24;312(12):1218–26.
69. Stout NK, Goldie SJ. Keeping the noise down: common random numbers for disease simulation modeling. *Health Care Manag Sci*. 2008 Dec;11(4):399–406.
70. United States Department of Labor. CPI Inflation Calculator. Available: [http://www.bls.gov/data/inflation\\_calculator.htm](http://www.bls.gov/data/inflation_calculator.htm).
71. Zhang E, Wartelle-Bladou C, Lepanto L, Lachaine J, Cloutier G, Tang A. Cost-utility analysis of nonalcoholic steatohepatitis screening. *Eur Radiol*. 2015 Nov;25(11):3282–94.
72. Murray CJL, Vos T, Lozano R, Naghavi M, Flaxman AD, Michaud C, et al. Disability-adjusted life years (DALYs) for 291 diseases and injuries in 21 regions, 1990-2010: a systematic analysis for the Global Burden of Disease Study 2010. *Lancet Lond Engl*. 2012 Dec 15;380(9859):2197–223.
73. Michelotti GA, Machado MV, Diehl AM. NAFLD, NASH and liver cancer. *Nat Rev Gastroenterol Hepatol*. 2013 Nov;10(11):656–65.
74. Page JM, Harrison SA. NASH and HCC. *Clin Liver Dis*. 2009 Nov;13(4):631–47.
75. Foster T, Anania FA, Li D, Katz R, Budoff M. The prevalence and clinical correlates of nonalcoholic fatty liver disease (NAFLD) in African Americans: the multiethnic study of atherosclerosis (MESA). *Dig Dis Sci*. 2013 Aug;58(8):2392–8.
76. Farrell GC, Larter CZ. Nonalcoholic fatty liver disease: from steatosis to cirrhosis. *Hepatol Baltim Md*. 2006 Feb;43(2 Suppl 1):S99–112.
77. Baumeister SE, Völzke H, Marschall P, John U, Schmidt C-O, Flessa S, et al. Impact of fatty liver disease on health care utilization and costs in a general population: a 5-year observation. *Gastroenterology*. 2008 Jan;134(1):85–94.
78. Adams LA, Lymp JF, St Sauver J, Sanderson SO, Lindor KD, Feldstein A, et al. The natural history of nonalcoholic fatty liver disease: a population-based cohort study. *Gastroenterology*. 2005 Jul;129(1):113–21.
79. Ascha MS, Hanouneh IA, Lopez R, Tamimi TA-R, Feldstein AF, Zein NN. The incidence and risk factors of hepatocellular carcinoma in patients with nonalcoholic steatohepatitis. *Hepatol Baltim Md*. 2010 Jun;51(6):1972–8.
80. Bambha K, Belt P, Abraham M, Wilson LA, Pabst M, Ferrell L, et al. Ethnicity and nonalcoholic fatty liver disease. *Hepatol Baltim Md*. 2012 Mar;55(3):769–80.
81. McAdam-Marx C, McGarry LJ, Hane CA, Biskupiak J, Deniz B, Brixner DI. All-cause and incremental per patient per year cost associated with chronic hepatitis C virus and associated liver complications in the United States: a managed care perspective. *J Manag Care Pharm JMCP*. 2011 Sep;17(7):531–46.
82. Lightwood J, Bibbins-Domingo K, Coxson P, Wang YC, Williams L, Goldman L. Forecasting the future economic burden of current adolescent overweight: an estimate of the coronary heart disease policy model. *Am J Public Health*. 2009 Dec;99(12):2230–7.
83. American Diabetes Association. Economic costs of diabetes in the U.S. in 2012. *Diabetes Care*. 2013 Apr;36(4):1033–46.
84. Li Q, Blume SW, Huang JC, Hammer M, Graf TR. The Economic Burden of Obesity by Glycemic Stage in the United States. *Pharmacoeconomics*. 2015 Jul;33(7):735–48.

- 1  
2  
3  
4  
5  
6  
7  
8  
9  
10  
11  
12  
13  
14  
15  
16  
17  
18  
19  
20  
21  
22  
23  
24  
25  
26  
27  
28  
29  
30  
31  
32  
33  
34  
35  
36  
37  
38  
39  
40  
41  
42  
43  
44  
45  
46  
47  
48  
49  
50  
51  
52  
53  
54  
55  
56  
57  
58  
59  
60
85. Darbà J, Kaskens L, Detournay B, Kern W, Nicolucci A, Orozco-Beltrán D, et al. Disability-adjusted life years lost due to diabetes in France, Italy, Germany, Spain, and the United Kingdom: a burden of illness study. *Clin Outcomes Res CEOR*. 2015;7:163–71.
  86. Keating CL, Peeters A, Swinburn BA, Magliano DJ, Moodie ML. Utility-based quality of life associated with overweight and obesity: the Australian diabetes, obesity, and lifestyle study. *Obes Silver Spring Md*. 2013 Mar;21(3):652–5.
  87. U.S. Census Bureau, Population Division. Population Estimates. Accessed on <http://www.census.gov/popest/index.html> at Apr 23, 2015.
  88. Anstee QM, Targher G, Day CP. Progression of NAFLD to diabetes mellitus, cardiovascular disease or cirrhosis. *Nat Rev Gastroenterol Hepatol*. 2013 Jun;10(6):330–44.
  89. Bruno S, Maisonneuve P, Castellana P, Rotmensz N, Rossi S, Maggioni M, et al. Incidence and risk factors for non-alcoholic steatohepatitis: prospective study of 5408 women enrolled in Italian tamoxifen chemoprevention trial. *BMJ*. 2005 Apr 23;330(7497):932.
  90. Ekstedt M, Franzén LE, Mathiesen UL, Thorelius L, Holmqvist M, Bodemar G, et al. Long-term follow-up of patients with NAFLD and elevated liver enzymes. *Hepatol Baltim Md*. 2006 Oct;44(4):865–73.
  91. Haukeland JW, Lorgen I, Schreiner LT, Frigstad S-O, Brandsaeter B, Bjørø K, et al. Incidence rates and causes of cirrhosis in a Norwegian population. *Scand J Gastroenterol*. 2007 Dec;42(12):1501–8.
  92. Musso G, Cassader M, Bo S, De Michieli F, Gambino R. Sterol regulatory element-binding factor 2 (SREBF-2) predicts 7-year NAFLD incidence and severity of liver disease and lipoprotein and glucose dysmetabolism. *Diabetes*. 2013 Apr;62(4):1109–20.
  93. Omagari K, Kadokawa Y, Masuda J-I, Egawa I, Sawa T, Hazama H, et al. Fatty liver in non-alcoholic non-overweight Japanese adults: incidence and clinical characteristics. *J Gastroenterol Hepatol*. 2002 Oct;17(10):1098–105.
  94. Rafiq N, Bai C, Fang Y, Srishord M, McCullough A, Gramlich T, et al. Long-term follow-up of patients with nonalcoholic fatty liver. *Clin Gastroenterol Hepatol Off Clin Pract J Am Gastroenterol Assoc*. 2009 Feb;7(2):234–8.
  95. Wong VW-S, Wong GL-H, Yeung DK-W, Lau TK-T, Chan CK-M, Chim AM-L, et al. Incidence of non-alcoholic fatty liver disease in Hong Kong: a population study with paired proton-magnetic resonance spectroscopy. *J Hepatol*. 2015 Jan;62(1):182–9.
  96. Zelber-Sagi S, Lotan R, Shlomai A, Webb M, Harrari G, Buch A, et al. Predictors for incidence and remission of NAFLD in the general population during a seven-year prospective follow-up. *J Hepatol*. 2012 May;56(5):1145–51.
  97. Kawamura Y, Arase Y, Ikeda K, Seko Y, Imai N, Hosaka T, et al. Large-scale long-term follow-up study of Japanese patients with non-alcoholic fatty liver disease for the onset of hepatocellular carcinoma. *Am J Gastroenterol*. 2012 Feb;107(2):253–61.
  98. Njei B, Rotman Y, Ditah I, Lim JK. Emerging trends in hepatocellular carcinoma incidence and mortality. *Hepatol Baltim Md*. 2015 Jan;61(1):191–9.
  99. El-Serag HB, Mason AC. Rising incidence of hepatocellular carcinoma in the United States. *N Engl J Med*. 1999 Mar 11;340(10):745–50.
  100. Lazo M, Hernaez R, Bonekamp S, Kamel IR, Brancati FL, Guallar E, et al. Non-alcoholic fatty liver disease and mortality among US adults: prospective cohort study. *BMJ*. 2011 Nov 18;343:d6891.
  101. Stepanova M, Rafiq N, Makhlof H, Agrawal R, Kaur I, Younoszai Z, et al. Predictors of all-cause mortality and liver-related mortality in patients with non-alcoholic fatty liver disease (NAFLD). *Dig Dis Sci*. 2013 Oct;58(10):3017–23.
  102. Söderberg C, Stål P, Askling J, Glaumann H, Lindberg G, Marmur J, et al. Decreased survival of subjects with elevated liver function tests during a 28-year follow-up. *Hepatol Baltim Md*. 2010 Feb;51(2):595–602.
  103. Hafliðadóttir S, Jonasson JG, Norland H, Einarsdóttir SO, Kleiner DE, Lund SH, et al. Long-term follow-up and liver-related death rate in patients with non-alcoholic and alcoholic related fatty liver disease. *BMC Gastroenterol*. 2014 Sep 27;14:166.
  104. National Heart, Lung, and Blood Institute . Morbidity & Mortality: 2012 Chart Book on Cardiovascular, Lung, and Blood Diseases. National Institutes of Health. National Heart, Lung, and Blood Institute. 2012.
  105. National Heart, Lung, and Blood Institute . Incidence and Prevalence: 2006 Chart Book on Cardiovascular and Lung Diseases. National Institutes of Health. National Heart, Lung, and Blood Institute. 2006.
  106. Fishman EI, Stokes A, Preston SH. The dynamics of diabetes among birth cohorts in the U.S. *Diabetes Care*. 2014 Apr;37(4):1052–9.

107. Daouli J, Davillas A, Demoussis M, Giannakopoulos N. Obesity persistence and duration dependence: evidence from a cohort of US adults (1985-2010). *Econ Hum Biol.* 2014 Jan;12:30-44.
108. Gordon-Larsen P, Adair LS, Nelson MC, Popkin BM. Five-year obesity incidence in the transition period between adolescence and adulthood: the National Longitudinal Study of Adolescent Health. *Am J Clin Nutr.* 2004 Sep;80(3):569-75.
109. Parikh NI, Pencina MJ, Wang TJ, Lanier KJ, Fox CS, D'Agostino RB, et al. Increasing trends in incidence of overweight and obesity over 5 decades. *Am J Med.* 2007 Mar;120(3):242-50.
110. Williamson DF, Kahn HS, Byers T. The 10-y incidence of obesity and major weight gain in black and white US women aged 30-55 y. *Am J Clin Nutr.* 1991 Jun;53(6 Suppl):1515S-1518S.
111. Schneider ALC, Lazo M, Selvin E, Clark JM. Racial differences in nonalcoholic fatty liver disease in the U.S. population. *Obes Silver Spring Md.* 2014 Jan;22(1):292-9.
112. Kelishadi R, Cook SR, Adibi A, Faghihimani Z, Ghatrehsamani S, Beihaghi A, et al. Association of the components of the metabolic syndrome with non-alcoholic fatty liver disease among normal-weight, overweight and obese children and adolescents. *Diabetol Metab Syndr.* 2009 Dec 22;1:29.
113. Peng L, Wang J, Li F. Weight reduction for non-alcoholic fatty liver disease. *Cochrane Database Syst Rev.* 2011 Jun 15;(6):CD003619.
114. Dassanayake AS, Kasturiratne A, Rajindrajith S, Kalubowila U, Chakrawarthy S, De Silva AP, et al. Prevalence and risk factors for non-alcoholic fatty liver disease among adults in an urban Sri Lankan population. *J Gastroenterol Hepatol.* 2009 Jul;24(7):1284-8.
115. Lee K, Sung J-A, Kim J-S, Park T-J. The roles of obesity and gender on the relationship between metabolic risk factors and non-alcoholic fatty liver disease in Koreans. *Diabetes Metab Res Rev.* 2009 Feb;25(2):150-5.
116. Zeb I, Katz R, Nasir K, Ding J, Rezaeian P, Budoff MJ. Relation of nonalcoholic fatty liver disease to the metabolic syndrome: the Multi-Ethnic Study of Atherosclerosis. *J Cardiovasc Comput Tomogr.* 2013 Oct;7(5):311-8.
117. Chan W-K, Tan AT-B, Vethakkan SR, Tah P-C, Vijayanathan A, Goh K-L. Non-alcoholic fatty liver disease in diabetics--prevalence and predictive factors in a multiracial hospital clinic population in Malaysia. *J Gastroenterol Hepatol.* 2013 Aug;28(8):1375-83.
118. Papandreou D, Karabouta Z, Pantoleon A, Rousso I. Investigation of anthropometric, biochemical and dietary parameters of obese children with and without non-alcoholic fatty liver disease. *Appetite.* 2012 Dec;59(3):939-44.
119. Wong VW-S, Wong GL-H, Yip GW-K, Lo AO-S, Limquiaco J, Chu WC-W, et al. Coronary artery disease and cardiovascular outcomes in patients with non-alcoholic fatty liver disease. *Gut.* 2011 Dec;60(12):1721-7.
120. Hamaguchi M, Kojima T, Takeda N, Nagata C, Takeda J, Sarui H, et al. Nonalcoholic fatty liver disease is a novel predictor of cardiovascular disease. *World J Gastroenterol.* 2007 Mar 14;13(10):1579-84.
121. Fan J-G, Li F, Cai X-B, Peng Y-D, Ao Q-H, Gao Y. Effects of nonalcoholic fatty liver disease on the development of metabolic disorders. *J Gastroenterol Hepatol.* 2007 Jul;22(7):1086-91.
122. Targher G, Bertolini L, Rodella S, Tessari R, Zenari L, Lippi G, et al. Nonalcoholic fatty liver disease is independently associated with an increased incidence of cardiovascular events in type 2 diabetic patients. *Diabetes Care.* 2007 Aug;30(8):2119-21.
123. Treeprasertsuk S, Leverage S, Adams LA, Lindor KD, St Sauver J, Angulo P. The Framingham risk score and heart disease in nonalcoholic fatty liver disease. *Liver Int Off J Int Assoc Study Liver.* 2012 Jul;32(6):945-50.
124. Canoy D, Cairns BJ, Balkwill A, Wright FL, Green J, Reeves G, et al. Body mass index and incident coronary heart disease in women: a population-based prospective study. *BMC Med.* 2013 Apr 2;11:87.
125. Global Burden of Metabolic Risk Factors for Chronic Diseases Collaboration (BMI Mediated Effects), Lu Y, Hajifathalian K, Ezzati M, Woodward M, Rimm EB, et al. Metabolic mediators of the effects of body-mass index, overweight, and obesity on coronary heart disease and stroke: a pooled analysis of 97 prospective cohorts with 1.8 million participants. *Lancet Lond Engl.* 2014 Mar 15;383(9921):970-83.
126. Gruson E, Montaye M, Kee F, Wagner A, Bingham A, Ruidavets J-B, et al. Anthropometric assessment of abdominal obesity and coronary heart disease risk in men: the PRIME study. *Heart Br Card Soc.* 2010 Jan;96(2):136-40.
127. de Hollander EL, Bogers RP, Boshuizen HC, Rosengren A, Shipley MJ, Knekt P, et al. Influence of calendar period on the association between BMI and coronary heart disease: a meta-analysis of 31 cohorts. *Obes Silver Spring Md.* 2013 May;21(5):865-80.

- 1
  - 2
  - 3
  - 4
  - 5
  - 6
  - 7
  - 8
  - 9
  - 10
  - 11
  - 12
  - 13
  - 14
  - 15
  - 16
  - 17
  - 18
  - 19
  - 20
  - 21
  - 22
  - 23
  - 24
  - 25
  - 26
  - 27
  - 28
  - 29
  - 30
  - 31
  - 32
  - 33
  - 34
  - 35
  - 36
  - 37
  - 38
  - 39
  - 40
  - 41
  - 42
  - 43
  - 44
  - 45
  - 46
  - 47
  - 48
  - 49
  - 50
  - 51
  - 52
  - 53
  - 54
  - 55
  - 56
  - 57
  - 58
  - 59
  - 60
128. Labounty TM, Gomez MJ, Achenbach S, Al-Mallah M, Berman DS, Budoff MJ, et al. Body mass index and the prevalence, severity, and risk of coronary artery disease: an international multicentre study of 13,874 patients. *Eur Heart J Cardiovasc Imaging*. 2013 May;14(5):456–63.
129. Mongraw-Chaffin ML, Peters SAE, Huxley RR, Woodward M. The sex-specific association between BMI and coronary heart disease: a systematic review and meta-analysis of 95 cohorts with 1.2 million participants. *Lancet Diabetes Endocrinol*. 2015 Jun;3(6):437–49.
130. Park YS, Kim J-S. Obesity phenotype and coronary heart disease risk as estimated by the Framingham risk score. *J Korean Med Sci*. 2012 Mar;27(3):243–9.
131. Taylor AE, Ebrahim S, Ben-Shlomo Y, Martin RM, Whincup PH, Yarnell JW, et al. Comparison of the associations of body mass index and measures of central adiposity and fat mass with coronary heart disease, diabetes, and all-cause mortality: a study using data from 4 UK cohorts. *Am J Clin Nutr*. 2010 Mar;91(3):547–56.
132. Peters SAE, Huxley RR, Woodward M. Diabetes as risk factor for incident coronary heart disease in women compared with men: a systematic review and meta-analysis of 64 cohorts including 858,507 individuals and 28,203 coronary events. *Diabetologia*. 2014 Aug;57(8):1542–51.
133. Shibata M, Kihara Y, Taguchi M, Tashiro M, Otsuki M. Nonalcoholic fatty liver disease is a risk factor for type 2 diabetes in middle-aged Japanese men. *Diabetes Care*. 2007 Nov;30(11):2940–4.
134. Kim C-H, Park J-Y, Lee K-U, Kim J-H, Kim H-K. Fatty liver is an independent risk factor for the development of Type 2 diabetes in Korean adults. *Diabet Med J Br Diabet Assoc*. 2008 Apr;25(4):476–81.
135. Yamada T, Fukatsu M, Suzuki S, Wada T, Yoshida T, Joh T. Fatty liver predicts impaired fasting glucose and type 2 diabetes mellitus in Japanese undergoing a health checkup. *J Gastroenterol Hepatol*. 2010 Feb;25(2):352–6.
136. Sung K-C, Kim SH. Interrelationship between fatty liver and insulin resistance in the development of type 2 diabetes. *J Clin Endocrinol Metab*. 2011 Apr;96(4):1093–7.
137. Kasturiratne A, Weerasinghe S, Dassanayake AS, Rajindrajith S, de Silva AP, Kato N, et al. Influence of non-alcoholic fatty liver disease on the development of diabetes mellitus. *J Gastroenterol Hepatol*. 2013 Jan;28(1):142–7.
138. Abdullah A, Peeters A, de Courten M, Stoelwinder J. The magnitude of association between overweight and obesity and the risk of diabetes: a meta-analysis of prospective cohort studies. *Diabetes Res Clin Pract*. 2010 Sep;89(3):309–19.
139. Nyamdorj R, Qiao Q, Söderberg S, Pitkaniemi JM, Zimmet PZ, Shaw JE, et al. BMI compared with central obesity indicators as a predictor of diabetes incidence in Mauritius. *Obes Silver Spring Md*. 2009 Feb;17(2):342–8.
140. Rolando L, Byrne DW, McGown PW, Goetzel RZ, Elasy TA, Yarbrough MI. Health risk factor modification predicts incidence of diabetes in an employee population: results of an 8-year longitudinal cohort study. *J Occup Environ Med*. 2013 Apr;55(4):410–5.
141. Rodbard HW, Bays HE, Gavin JR, Green AJ, Bazata DD, Lewis SJ, et al. Rate and risk predictors for development of self-reported type-2 diabetes mellitus over a 5-year period: the SHIELD study. *Int J Clin Pract*. 2012 Jul;66(7):684–91.
142. Kodama S, Horikawa C, Fujihara K, Yoshizawa S, Yachi Y, Tanaka S, et al. Quantitative relationship between body weight gain in adulthood and incident type 2 diabetes: a meta-analysis. *Obes Rev Off J Int Assoc Study Obes*. 2014 Mar;15(3):202–14.
143. Bell JA, Kivimaki M, Hamer M. Metabolically healthy obesity and risk of incident type 2 diabetes: a meta-analysis of prospective cohort studies. *Obes Rev Off J Int Assoc Study Obes*. 2014 Jun;15(6):504–15.
144. Guh DP, Zhang W, Bansback N, Amarsi Z, Birmingham CL, Anis AH. The incidence of co-morbidities related to obesity and overweight: a systematic review and meta-analysis. *BMC Public Health*. 2009 Mar 25;9:88.
145. Emond JA, Patterson RE, Jardack PM, Arab L. Using doubly labeled water to validate associations between sugar-sweetened beverage intake and body mass among White and African-American adults. *Int J Obes*. 2014 Apr;38(4):603–9.
146. Grimes CA, Riddell LJ, Campbell KJ, Nowson CA. Dietary salt intake, sugar-sweetened beverage consumption, and obesity risk. *Pediatrics*. 2013 Jan;131(1):14–21.
147. Gregg EW, Boyle JP, Thompson TJ, Barker LE, Albright AL, Williamson DF. Modeling the impact of prevention policies on future diabetes prevalence in the United States: 2010-2030. *Popul Health Metr*. 2013 Sep 18;11(1):18.
148. Guariguata L, Whiting DR, Hambleton I, Beagley J, Linnenkamp U, Shaw JE. Global estimates of diabetes prevalence for 2013 and projections for 2035. *Diabetes Res Clin Pract*. 2014 Feb;103(2):137–49.

- 1  
2  
3  
4  
5  
6  
7  
8  
9  
10  
11  
12  
13  
14  
15  
16  
17  
18  
19  
20  
21  
22  
23  
24  
25  
26  
27  
28  
29  
30  
31  
32  
33  
34  
35  
36  
37  
38  
39  
40  
41  
42  
43  
44  
45  
46  
47  
48  
49  
50  
51  
52  
53  
54  
55  
56  
57  
58  
59  
60
149. Huang ES, Basu A, O'Grady M, Capretta JC. Projecting the future diabetes population size and related costs for the U.S. *Diabetes Care*. 2009 Dec;32(12):2225–9.
  150. Finkelstein EA, Khavjou OA, Thompson H, Trogdon JG, Pan L, Sherry B, et al. Obesity and severe obesity forecasts through 2030. *Am J Prev Med*. 2012 Jun;42(6):563–70.
  151. Odden MC, Coxson PG, Moran A, Lightwood JM, Goldman L, Bibbins-Domingo K. The impact of the aging population on coronary heart disease in the United States. *Am J Med*. 2011 Sep;124(9):827–833.e5.
  152. American Cancer Society. *Cancer Facts & Figures 2012*. Atlanta: American Cancer Society; 2012.
  153. Younossi ZM, Blissett D, Blissett R, Henry L, Stepanova M, Younossi Y, et al. The economic and clinical burden of nonalcoholic fatty liver disease in the United States and Europe. *HepatoL Baltim Md*. 2016 Nov;64(5):1577–86.
  154. Ervin RB, Ogden CL. Consumption of added sugars among U.S. adults, 2005-2010. *NCHS Data Brief*. 2013 May;(122):1–8.
  155. Morgan Stanley Research (2015). The bittersweet aftertaste of sugar. March 18, 2015. <http://static.latribune.fr/463077/etude-morgan-stanley-impact-diabete-sur-l-economie-mondiale.pdf>.
  156. Gombi-Vaca MF, Sichieri R, Verly-Jr E. Caloric compensation for sugar-sweetened beverages in meals: A population-based study in Brazil. *Appetite*. 2016 Mar 1;98:67–73.
  157. Saadeh S, Younossi ZM, Remer EM, Gramlich T, Ong JP, Hurley M, et al. The utility of radiological imaging in nonalcoholic fatty liver disease. *Gastroenterology*. 2002 Sep;123(3):745–50.



Figure 1. Model state and covariate structure.

Each individual gets assigned a state in each chain at the start of the simulation and their specific covariates (age, sex, ethnicity, high/low sugar consumption). Circles represent disease states. Solid lines indicate a possible transition pathway between states. Coloured lines indicate how being in a state within one chain can affect the value of the transition probability between two states in another chain. These are split into three categories: pink striped lines indicate the effect of NAFLD on progression in the BMI, T2D and CHD chains. Blue dotted lines indicate the effect of overweight and obesity on progression in the NAFLD, T2D and CHD chains. The green dotted line indicates the effect of T2D on progression in the CHD chain. 3 chains contain disease related deaths and the model contains a non-disease related death state for other causes of mortality. The states of individuals are updated every cycle (i.e. annually) for 20 years. Each cycle the state distributions and their related costs and DALYs are generated as output.

NAFLD: non-alcoholic fatty liver disease, T2D: type 2 diabetes, CHD: coronary heart disease, NASH: non-alcoholic steatohepatitis, HCC: hepatocellular carcinoma, DALYs: disability-adjusted life years.

340x156mm (300 x 300 DPI)



Figure 2, graphs A to H. reduction in population prevalence of disease due to interventions. Lines represent mean values +/- one standard deviation. 0% is the baseline, representing no intervention. The blue lines with diamonds indicate a reduction of added sugar of 20%. The red lines with crosses represent a reduction of 50%. NASH; non-alcoholic steatohepatitis.

249x346mm (300 x 300 DPI)

1  
2  
3  
4  
5  
6  
7  
8  
9  
10  
11  
12  
13  
14  
15  
16  
17  
18  
19  
20  
21  
22  
23  
24  
25  
26  
27  
28  
29  
30  
31  
32  
33  
34  
35  
36  
37  
38  
39  
40  
41  
42  
43  
44  
45  
46  
47  
48  
49  
50  
51  
52  
53  
54  
55  
56  
57  
58  
59  
60



Figure 3. Tornado diagram of the ten most critical variables on total costs averted in the year 2035.  
 Figure 4. Tornado diagram of the ten most critical variables on total DALYs averted in the year 2035.

73x28mm (300 x 300 DPI)

Peer review only

## Online supplement

## Non-alcoholic fatty liver disease as a mediator of sugar effects; implications for the health and economic benefits of interventions in the US

*Rick A Vreman, Alex J Goodell, Luis A Rodriguez, Travis C Porco, Robert H Lustig, James G Kahn*

### Content

|                                                                                                        |    |
|--------------------------------------------------------------------------------------------------------|----|
| <b>Table 1.</b> Selected model parameter values and ranges .....                                       | 2  |
| <b>Table 2.</b> Age distribution .....                                                                 | 3  |
| <b>Table 3.</b> Sex distribution.....                                                                  | 4  |
| <b>Table 4.</b> Ethnic distribution .....                                                              | 4  |
| <b>Table 5.</b> Non-alcoholic fatty liver disease prevalence percentage at start of simulation.....    | 4  |
| <b>Table 6.</b> Coronary heart disease prevalence percentage at the start of the simulation .....      | 5  |
| <b>Table 7.</b> Type 2 diabetes prevalence percentage at the start of the simulation .....             | 6  |
| <b>Table 8.</b> Overweight and obesity prevalence percentages at the start of the simulation .....     | 7  |
| <b>Table 9.</b> Added sugar consumption distributions.....                                             | 7  |
| <b>Table 10.</b> Hepatocellular carcinoma incidence rate from NASH .....                               | 8  |
| <b>Table 11.</b> Hepatocellular carcinoma incidence rate from cirrhosis .....                          | 8  |
| <b>Table 12.</b> Coronary heart disease incidence rate (in %) .....                                    | 9  |
| <b>Table 13.</b> Coronary heart disease mortality rate (in %).....                                     | 9  |
| <b>Table 14.</b> Type 2 diabetes incidence rate.....                                                   | 10 |
| <b>Table 15.</b> Type 2 diabetes mortality rate .....                                                  | 10 |
| <b>Table 16.</b> Non-disease related mortality rate (in %) .....                                       | 11 |
| <b>Table 17.</b> IHME health-adjusted life expectancy and discounted life expectancy for females ..... | 12 |
| <b>Table 18.</b> IHME health-adjusted life expectancy and discounted life expectancy for males .....   | 13 |
| <b>References</b> .....                                                                                | 14 |

Table 1. Selected model parameter values and ranges.

| <b>Parameter</b>                                            |                     |                    |            |            |               |
|-------------------------------------------------------------|---------------------|--------------------|------------|------------|---------------|
| <b>Initialization</b>                                       | <b>Distribution</b> | <b>Mean</b>        | <b>Min</b> | <b>Max</b> | <b>Source</b> |
| Age distribution                                            | Fixed               | OS2*1              | -          | -          | [1]           |
| Sex distribution                                            | Fixed               | OS3*2              | -          | -          | [1]           |
| Ethnicity distribution                                      | Fixed               | OS4*3              | -          | -          | [1]           |
| Steatosis prevalence                                        | Beta                | 27.955%*4          | 18.637%    | 41.933%    | [2-4]         |
| NASH prevalence                                             | Beta                | 3.141%*4           | 2.094%     | 4.712%     | [2-4]         |
| Cirrhosis prevalence                                        | Beta                | 0.314%*4           | 0.209%     | 0.471%     | [5-8]         |
| HCC prevalence                                              | Beta                | 0.025%*4           | 0.017%     | 0.038%     | [9,10]        |
| CHD prevalence                                              | Fixed               | 6.544%*5           | -          | -          | [11]          |
| T2D prevalence                                              | Fixed               | 9.447%*6           | -          | -          | [11]          |
| Overweight prevalence                                       | Fixed               | 33.473%*7          | -          | -          | [11]          |
| Obesity prevalence                                          | Fixed               | 37.391%*8          | -          | -          | [11]          |
| High sugar consumption                                      | Beta                | 57.278%*9          | 38.186%    | 85.917%    | [12,13]       |
| <b>Baseline transition probabilities</b>                    |                     |                    |            |            |               |
|                                                             | <b>Distribution</b> | <b>Mean chance</b> | <b>Min</b> | <b>Max</b> | <b>Source</b> |
| Non-NAFLD -> steatosis                                      | Beta                | 0.0100             | 0.006700   | 0.01500    | [14-22]       |
| Non-NAFLD -> NASH                                           | Beta                | 0.0003             | 0.000201   | 0.00045    | [14-22]       |
| Steatosis -> non-NAFLD                                      | Beta                | 0.0200             | 0.013400   | 0.03000    | [14-22]       |
| Steatosis -> NASH                                           | Beta                | 0.0060             | 0.004020   | 0.00900    | [14-22]       |
| Steatosis -> cirrhosis                                      | Beta                | 0.0002             | 0.000134   | 0.00030    | [14-22]       |
| NASH -> non-NAFLD                                           | Beta                | 0.0010             | 0.000670   | 0.00150    | [14-22]       |
| NASH -> steatosis                                           | Beta                | 0.0200             | 0.013400   | 0.03000    | [14-22]       |
| NASH -> cirrhosis                                           | Beta                | 0.0020             | 0.001340   | 0.00300    | [14-22]       |
| NASH -> HCC                                                 | Beta                | 0.0001*10          | 0.000067   | 0.00015    | [14-25]       |
| NASH -> liver death                                         | Beta                | 0.0038             | 0.002546   | 0.00570    | [26-29]       |
| Cirrhosis -> HCC                                            | Beta                | 0.0200*10          | 0.013400   | 0.03000    | [14-25]       |
| Cirrhosis -> liver death                                    | Beta                | 0.0340             | 0.022780   | 0.05100    | [26-29]       |
| HCC -> liver death                                          | Beta                | 0.5000             | 0.335000   | 0.75000    | [26-29]       |
| Non-CHD -> CHD                                              | Beta                | 0.0045*11          | 0.003015   | 0.00675    | [30,31]       |
| CHD -> CHD death                                            | Beta                | 0.0100*12          | 0.006700   | 0.01500    | [30-32]       |
| Non-T2D -> T2D                                              | Beta                | 0.0045*13          | 0.003015   | 0.00675    | [33,34]       |
| T2D -> T2D death                                            | Beta                | 0.0100*14          | 0.006700   | 0.01500    | [32-34]       |
| Healthy weight -> overweight                                | Beta                | 0.0500             | 0.033500   | 0.07500    | [35-38]       |
| Healthy weight -> obese                                     | Beta                | 0.0060             | 0.004020   | 0.00900    | [35-38]       |
| Overweight -> healthy weight                                | Beta                | 0.0500             | 0.033500   | 0.07500    | [35-38]       |
| Overweight -> obese                                         | Beta                | 0.0180             | 0.012060   | 0.02700    | [35-38]       |
| Obese -> healthy weight                                     | Beta                | 0.0060             | 0.004020   | 0.00900    | [35-38]       |
| Obese -> overweight                                         | Beta                | 0.0350             | 0.023450   | 0.05250    | [35-38]       |
| Each alive state -> non-disease related death               | Beta                | 0.0100*15          | 0.006700   | 0.01500    | [32]          |
| <b>Risk factors</b>                                         |                     |                    |            |            |               |
|                                                             | <b>Distribution</b> | <b>Mean value</b>  | <b>Min</b> | <b>Max</b> | <b>Source</b> |
| NHB ethnicity for progression within NAFLD                  | Beta                | 0.93               | 0.70       | 1.00       | [39]          |
| Hispanic ethnicity for progression within NAFLD             | Beta                | 1.67               | 1.22       | 2.22       | [39]          |
| Overweight for progression within NAFLD                     | Beta                | 2.19               | 1.60       | 3.38       | [15,40-45]    |
| Obesity for progression within NAFLD                        | Beta                | 3.14               | 2.07       | 5.28       | [15,40-45]    |
| High sugar consumption for progression within NAFLD         | Beta                | 2.00               | 1.50       | 3.00       | [46,47]       |
| NAFLD for TP non-CHD -> CHD                                 | Beta                | 2.31               | 1.66       | 3.62       | [48-52]       |
| Overweight for TP non-CHD -> CHD                            | Beta                | 1.22               | 1.12       | 1.32       | [53-60]       |
| Obesity for TP non-CHD -> CHD                               | Beta                | 1.60               | 1.43       | 1.79       | [53-60]       |
| T2D for TP non-CHD -> CHD                                   | Beta                | 2.24               | 1.64       | 3.06       | [61]          |
| NAFLD for TP non-T2D -> T2D                                 | Beta                | 2.73               | 1.87       | 4.46       | [62-68]       |
| Overweight for TP non-T2D -> T2D                            | Beta                | 2.18               | 1.59       | 3.36       | [69-75]       |
| Obesity for TP non-T2D -> T2D                               | Beta                | 3.36               | 2.18       | 5.72       | [69-75]       |
| NAFLD for progression within the BMI chain                  | Beta                | 2.19               | 1.60       | 3.38       | [15,40-45]    |
| High sugar consumption for progression within the BMI chain | Beta                | 2.60               | 1.20       | 6.00       | [76,77]       |
| <b>Regression rates</b>                                     |                     |                    |            |            |               |
|                                                             | <b>Distribution</b> | <b>Mean value</b>  | <b>Min</b> | <b>Max</b> | <b>Source</b> |
| CHD incidence regression rate/year                          | Beta                | 0.985              | 0.970      | 1.00       | [78-81]       |
| CHD mortality regression rate/year                          | Beta                | 0.979              | 0.958      | 1.00       | [78-81]       |
| Non-disease mortality regression rate/year (20-30)          | Beta                | 1.000              | 0.990      | 1.00       | [32]          |
| Non-disease mortality regression rate/year (30-55)          | Beta                | 0.980              | 0.960      | 1.00       | [32]          |
| Non-disease mortality regression rate/year (55+)            | Beta                | 0.970              | 0.940      | 1.00       | [32]          |

**Table 1.** Continued

| Costs (annual direct medical, in 2015 USD) | Distribution | Mean value | SD    | Source  |
|--------------------------------------------|--------------|------------|-------|---------|
| Steatosis                                  | Gamma        | 134        | 50    | [82-85] |
| NASH                                       | Gamma        | 267        | 100   | [82-85] |
| Cirrhosis                                  | Gamma        | 2861       | 1073  | [86]    |
| HCC                                        | Gamma        | 42644      | 15992 | [87,88] |
| CHD                                        | Gamma        | 13233      | 4962  | [89]    |
| T2D                                        | Gamma        | 8170       | 3064  | [90]    |
| Overweight                                 | Gamma        | 343        | 129   | [91]    |
| Obesity                                    | Gamma        | 916        | 344   | [91]    |

  

| Disability weights | Distribution | Mean value | Min   | Max   | Source |
|--------------------|--------------|------------|-------|-------|--------|
| NASH               | Beta         | 0.033      | 0.017 | 0.066 | [3,84] |
| Cirrhosis          | Beta         | 0.194      | 0.127 | 0.273 | [92]   |
| HCC                | Beta         | 0.294      | 0.199 | 0.411 | [92]   |
| CHD                | Beta         | 0.066      | 0.043 | 0.095 | [92]   |
| T2D                | Beta         | 0.150      | 0.080 | 0.220 | [92]   |
| Obesity            | Beta         | 0.012      | 0.001 | 0.022 | [93]   |

SD: standard deviation, CHD: coronary heart disease, T2D: type 2 diabetes, NAFLD: non-alcoholic fatty liver disease (steatosis, NASH & cirrhosis), NASH: non-alcoholic steatohepatitis, HCC: hepatocellular carcinoma, Hisp: Hispanic, NHW: non-Hispanic white, NHB: non-Hispanic black, TP: transition probability, OR: odds ratio

\*1 See online supplement table 2. \*2 See online supplement table 3. \*3 See online supplement table 4. \*4 See online supplement table 5. \*5 See online supplement table 6. \*6 See online supplement table 7. \*7 See online supplement table 8. \*8 See online supplement table 9. \*9 See online supplement table 10. \*10 See online supplement table 11. \*11 See online supplement table 12. \*12 See online supplement table 13. \*13 See online supplement table 14. \*14 See online supplement table 15. \*15 See online supplement table 16.

**Table 2.** Age distribution.[1]

| Age | Percentage | Age | Percentage |
|-----|------------|-----|------------|
| 20  | 1.9194     | 55  | 1.7505     |
| 21  | 1.9194     | 56  | 1.7505     |
| 22  | 1.9194     | 57  | 1.7505     |
| 23  | 1.9194     | 58  | 1.7505     |
| 24  | 1.9194     | 59  | 1.7505     |
| 25  | 1.8701     | 60  | 1.5024     |
| 26  | 1.8701     | 61  | 1.5024     |
| 27  | 1.8701     | 62  | 1.5024     |
| 28  | 1.8701     | 63  | 1.5024     |
| 29  | 1.8701     | 64  | 1.5024     |
| 30  | 1.7749     | 65  | 1.1073     |
| 31  | 1.7749     | 66  | 1.1073     |
| 32  | 1.7749     | 67  | 1.1073     |
| 33  | 1.7749     | 68  | 1.1073     |
| 34  | 1.7749     | 69  | 1.1073     |
| 35  | 1.7757     | 70  | 0.8256     |
| 36  | 1.7757     | 71  | 0.8256     |
| 37  | 1.7757     | 72  | 0.8256     |
| 38  | 1.7757     | 73  | 0.8256     |
| 39  | 1.7757     | 74  | 0.8256     |
| 40  | 1.8487     | 75  | 0.6473     |
| 41  | 1.8487     | 76  | 0.6473     |
| 42  | 1.8487     | 77  | 0.6473     |
| 43  | 1.8487     | 78  | 0.6473     |
| 44  | 1.8487     | 79  | 0.6473     |
| 45  | 2.0018     | 80  | 0.5093     |
| 46  | 2.0018     | 81  | 0.5093     |
| 47  | 2.0018     | 82  | 0.5093     |
| 48  | 2.0018     | 83  | 0.5093     |
| 49  | 2.0018     | 84  | 0.5093     |
| 50  | 1.9767     | 85+ | 2.4517     |
| 51  | 1.9767     |     |            |
| 52  | 1.9767     |     |            |
| 53  | 1.9767     |     |            |
| 54  | 1.9767     |     |            |

1  
2  
3  
4  
5  
6  
7  
8  
9  
10  
11  
12  
13  
14  
15  
16  
17  
18  
19  
20  
21  
22  
23  
24  
25  
26  
27  
28  
29  
30  
31  
32  
33  
34  
35  
36  
37  
38  
39  
40  
41  
42  
43  
44  
45  
46  
47  
48  
49  
50  
51  
52  
53  
54  
55  
56  
57  
58  
59  
60

**Table 3.** Sex distribution.[1]

| Sex    | Percentage |
|--------|------------|
| Male   | 48.4388    |
| Female | 51.5612    |

**Table 4.** Ethnic distribution.[1]

| Age                | Percentage |
|--------------------|------------|
| Hispanic           | 14.0377    |
| Non-hispanic White | 74.3771    |
| Non-hispanic Black | 11.5852    |

**Table 5.** Non-alcoholic fatty liver disease prevalence percentage at start of simulation.[2-10]

| Ethnicity | Steatosis | NASH | Cirrhosis | Hepatocellular carcinoma |
|-----------|-----------|------|-----------|--------------------------|
| Hispanic  | 40.05     | 4.5  | 0.45      | 0.0363                   |
| NH-White  | 26.70     | 3.0  | 0.30      | 0.0242                   |
| NH-Black  | 21.36     | 2.4  | 0.24      | 0.0194                   |

For peer review only

**Table 6.** Coronary heart disease prevalence percentage at the start of the simulation.[11]

| Sex    | Ethnicity | Age   | Percentage with CHD |
|--------|-----------|-------|---------------------|
| Male   | Hispanic  | 20-35 | 0.00                |
| Male   | Hispanic  | 35-44 | 1.30                |
| Male   | Hispanic  | 45-54 | 3.90                |
| Male   | Hispanic  | 55-64 | 10.60               |
| Male   | Hispanic  | 65-74 | 19.20               |
| Male   | Hispanic  | 75-84 | 23.50               |
| Male   | Hispanic  | 85+   | 23.80               |
| Male   | NH-White  | 20-35 | 0.00                |
| Male   | NH-White  | 35-44 | 1.20                |
| Male   | NH-White  | 45-54 | 6.00                |
| Male   | NH-White  | 55-64 | 13.80               |
| Male   | NH-White  | 65-74 | 23.30               |
| Male   | NH-White  | 75-84 | 31.80               |
| Male   | NH-White  | 85+   | 38.60               |
| Male   | NH-Black  | 20-35 | 0.00                |
| Male   | NH-Black  | 35-44 | 1.70                |
| Male   | NH-Black  | 45-54 | 7.50                |
| Male   | NH-Black  | 55-64 | 14.20               |
| Male   | NH-Black  | 65-74 | 16.90               |
| Male   | NH-Black  | 75-84 | 22.10               |
| Male   | NH-Black  | 85+   | 18.80               |
| Female | Hispanic  | 20-35 | 0.00                |
| Female | Hispanic  | 35-44 | 1.20                |
| Female | Hispanic  | 45-54 | 3.00                |
| Female | Hispanic  | 55-64 | 6.70                |
| Female | Hispanic  | 65-74 | 16.20               |
| Female | Hispanic  | 75-84 | 20.30               |
| Female | Hispanic  | 85+   | 23.90               |
| Female | NH-White  | 20-35 | 0.00                |
| Female | NH-White  | 35-44 | 0.90                |
| Female | NH-White  | 45-54 | 3.30                |
| Female | NH-White  | 55-64 | 6.70                |
| Female | NH-White  | 65-74 | 11.20               |
| Female | NH-White  | 75-84 | 18.40               |
| Female | NH-White  | 85+   | 24.30               |
| Female | NH-Black  | 20-35 | 0.00                |
| Female | NH-Black  | 35-44 | 1.20                |
| Female | NH-Black  | 45-54 | 5.30                |
| Female | NH-Black  | 55-64 | 11.20               |
| Female | NH-Black  | 65-74 | 17.40               |
| Female | NH-Black  | 75-84 | 19.80               |
| Female | NH-Black  | 85+   | 21.80               |

**Table 7.** Type 2 diabetes prevalence percentage at the start of the simulation.[11]

| Sex    | Ethnicity | Age   | Percentage with T2D |
|--------|-----------|-------|---------------------|
| Male   | Hispanic  | 20-24 | 0.90                |
| Male   | Hispanic  | 25-44 | 3.50                |
| Male   | Hispanic  | 45-54 | 14.20               |
| Male   | Hispanic  | 55-64 | 25.80               |
| Male   | Hispanic  | 65-74 | 32.80               |
| Male   | Hispanic  | 75-84 | 31.30               |
| Male   | Hispanic  | 85+   | 23.80               |
| Male   | NH-White  | 20-24 | 0.90                |
| Male   | NH-White  | 25-44 | 2.40                |
| Male   | NH-White  | 45-54 | 8.20                |
| Male   | NH-White  | 55-64 | 14.70               |
| Male   | NH-White  | 65-74 | 20.10               |
| Male   | NH-White  | 75-84 | 20.50               |
| Male   | NH-White  | 85+   | 17.90               |
| Male   | NH-Black  | 20-24 | 1.00                |
| Male   | NH-Black  | 25-44 | 5.00                |
| Male   | NH-Black  | 45-54 | 15.00               |
| Male   | NH-Black  | 55-64 | 24.00               |
| Male   | NH-Black  | 65-74 | 26.50               |
| Male   | NH-Black  | 75-84 | 39.00               |
| Male   | NH-Black  | 85+   | 18.70               |
| Female | Hispanic  | 20-24 | 0.90                |
| Female | Hispanic  | 25-44 | 3.60                |
| Female | Hispanic  | 45-54 | 10.30               |
| Female | Hispanic  | 55-64 | 24.00               |
| Female | Hispanic  | 65-74 | 34.80               |
| Female | Hispanic  | 75-84 | 32.40               |
| Female | Hispanic  | 85+   | 22.80               |
| Female | NH-White  | 20-24 | 1.20                |
| Female | NH-White  | 25-44 | 2.80                |
| Female | NH-White  | 45-54 | 7.30                |
| Female | NH-White  | 55-64 | 12.10               |
| Female | NH-White  | 65-74 | 17.00               |
| Female | NH-White  | 75-84 | 17.10               |
| Female | NH-White  | 85+   | 12.10               |
| Female | NH-Black  | 20-24 | 1.00                |
| Female | NH-Black  | 25-44 | 5.20                |
| Female | NH-Black  | 45-54 | 10.90               |
| Female | NH-Black  | 55-64 | 24.10               |
| Female | NH-Black  | 65-74 | 32.60               |
| Female | NH-Black  | 75-84 | 31.60               |
| Female | NH-Black  | 85+   | 20.20               |

**Table 8.** Overweight and obesity prevalence percentages at the start of the simulation.[11]

| Sex    | Ethnicity | Age   | Overweight percentage | Obesity percentage |
|--------|-----------|-------|-----------------------|--------------------|
| Male   | Hispanic  | 20-44 | 39.5                  | 36.8               |
| Male   | Hispanic  | 45-64 | 43.8                  | 41.0               |
| Male   | Hispanic  | 65+   | 42.8                  | 44.7               |
| Male   | White     | 20-44 | 35.7                  | 31.6               |
| Male   | White     | 45-64 | 40.8                  | 39.0               |
| Male   | White     | 65+   | 42.5                  | 36.9               |
| Male   | Black     | 20-44 | 28.7                  | 36.9               |
| Male   | Black     | 45-64 | 34.3                  | 40.6               |
| Male   | Black     | 65+   | 37.0                  | 36.7               |
| Female | Hispanic  | 20-44 | 33.2                  | 36.8               |
| Female | Hispanic  | 45-64 | 32.9                  | 52.9               |
| Female | Hispanic  | 65+   | 33.0                  | 49.3               |
| Female | White     | 20-44 | 25.3                  | 28.0               |
| Female | White     | 45-64 | 32.6                  | 37.4               |
| Female | White     | 65+   | 29.5                  | 44.3               |
| Female | Black     | 20-44 | 22.3                  | 56.1               |
| Female | Black     | 45-64 | 27.1                  | 61.8               |
| Female | Black     | 65+   | 25.8                  | 53.7               |

**Table 9.** Added sugar consumption distributions.[12,13]

| Sex           | Ethnicity          | Consumption group      | % in low vs high risk group |
|---------------|--------------------|------------------------|-----------------------------|
| <b>Male</b>   | Hispanic           | Low sugar consumption  | 36.40%                      |
| <b>Male</b>   | Hispanic           | High sugar consumption | 63.60%                      |
| <b>Male</b>   | Non-hispanic White | Low sugar consumption  | 36.40%                      |
| <b>Male</b>   | Non-hispanic White | High sugar consumption | 63.60%                      |
| <b>Male</b>   | Non-hispanic Black | Low sugar consumption  | 34.10%                      |
| <b>Male</b>   | Non-hispanic Black | High sugar consumption | 65.90%                      |
| <b>Female</b> | Hispanic           | Low sugar consumption  | 52.80%                      |
| <b>Female</b> | Hispanic           | High sugar consumption | 47.20%                      |
| <b>Female</b> | Non-hispanic White | Low sugar consumption  | 49.30%                      |
| <b>Female</b> | Non-hispanic White | High sugar consumption | 50.70%                      |
| <b>Female</b> | Non-hispanic Black | Low sugar consumption  | 41.70%                      |
| <b>Female</b> | Non-hispanic Black | High sugar consumption | 58.30%                      |

Table 10. Hepatocellular carcinoma incidence rate from NASH.[14-25]

| Age               | Incidence rate |
|-------------------|----------------|
| 40 to 44 years    | 3.64216E-05    |
| 45 to 49 years    | 4.64842E-05    |
| 50 to 54 years    | 5.93269E-05    |
| 55 to 59 years    | 7.57179E-05    |
| 60 to 64 years    | 9.66373E-05    |
| 65 to 69 years    | 0.000123336    |
| 70 to 74 years    | 0.000157412    |
| 75 to 79 years    | 0.000200902    |
| 80 years and over | 0.000256408    |

Table 11. Hepatocellular carcinoma incidence rate from cirrhosis.[14-25]

| Age               | Incidence rate |
|-------------------|----------------|
| 40 to 44 years    | 0.008844339    |
| 45 to 49 years    | 0.011287867    |
| 50 to 54 years    | 0.014406497    |
| 55 to 59 years    | 0.018386746    |
| 60 to 64 years    | 0.023466665    |
| 65 to 69 years    | 0.029950073    |
| 70 to 74 years    | 0.038224725    |
| 75 to 79 years    | 0.048785512    |
| 80 years and over | 0.062264050    |

**Table 12.** Coronary heart disease incidence rate (in %).[30,31]

| Year | <35 | 35-39  | 40-44  | 45-49  | 50-54  | 55-59  | 60-64  | 65-69  | 70-74  | 75-79  | 80-84  | 85+    |
|------|-----|--------|--------|--------|--------|--------|--------|--------|--------|--------|--------|--------|
| 2010 | 0.0 | 0.0516 | 0.0516 | 0.2007 | 0.2007 | 0.3519 | 0.3519 | 0.5869 | 0.5869 | 1.4447 | 1.4447 | 3.0621 |
| 2011 | 0.0 | 0.0508 | 0.0508 | 0.1976 | 0.1976 | 0.3466 | 0.3466 | 0.5781 | 0.5781 | 1.4230 | 1.4230 | 3.0162 |
| 2012 | 0.0 | 0.0501 | 0.0501 | 0.1947 | 0.1947 | 0.3414 | 0.3414 | 0.5694 | 0.5694 | 1.4017 | 1.4017 | 2.9709 |
| 2013 | 0.0 | 0.0493 | 0.0493 | 0.1918 | 0.1918 | 0.3363 | 0.3363 | 0.5609 | 0.5609 | 1.3806 | 1.3806 | 2.9263 |
| 2014 | 0.0 | 0.0486 | 0.0486 | 0.1889 | 0.1889 | 0.3312 | 0.3312 | 0.5525 | 0.5525 | 1.3599 | 1.3599 | 2.8825 |
| 2015 | 0.0 | 0.0478 | 0.0478 | 0.1860 | 0.1860 | 0.3262 | 0.3262 | 0.5442 | 0.5442 | 1.3395 | 1.3395 | 2.8392 |
| 2016 | 0.0 | 0.0471 | 0.0471 | 0.1833 | 0.1833 | 0.3214 | 0.3214 | 0.5360 | 0.5360 | 1.3194 | 1.3194 | 2.7966 |
| 2017 | 0.0 | 0.0464 | 0.0464 | 0.1805 | 0.1805 | 0.3165 | 0.3165 | 0.5280 | 0.5280 | 1.2997 | 1.2997 | 2.7547 |
| 2018 | 0.0 | 0.0457 | 0.0457 | 0.1778 | 0.1778 | 0.3118 | 0.3118 | 0.5201 | 0.5201 | 1.2802 | 1.2802 | 2.7134 |
| 2019 | 0.0 | 0.0450 | 0.0450 | 0.1751 | 0.1751 | 0.3071 | 0.3071 | 0.5123 | 0.5123 | 1.2610 | 1.2610 | 2.6727 |
| 2020 | 0.0 | 0.0444 | 0.0444 | 0.1725 | 0.1725 | 0.3025 | 0.3025 | 0.5046 | 0.5046 | 1.2420 | 1.2420 | 2.6326 |
| 2021 | 0.0 | 0.0437 | 0.0437 | 0.1699 | 0.1699 | 0.2980 | 0.2980 | 0.4970 | 0.4970 | 1.2234 | 1.2234 | 2.5931 |
| 2022 | 0.0 | 0.0430 | 0.0430 | 0.1674 | 0.1674 | 0.2935 | 0.2935 | 0.4896 | 0.4896 | 1.2051 | 1.2051 | 2.5542 |
| 2023 | 0.0 | 0.0424 | 0.0424 | 0.1649 | 0.1649 | 0.2891 | 0.2891 | 0.4822 | 0.4822 | 1.1870 | 1.1870 | 2.5159 |
| 2024 | 0.0 | 0.0418 | 0.0418 | 0.1624 | 0.1624 | 0.2848 | 0.2848 | 0.4750 | 0.4750 | 1.1692 | 1.1692 | 2.4781 |
| 2025 | 0.0 | 0.0411 | 0.0411 | 0.1600 | 0.1600 | 0.2805 | 0.2805 | 0.4679 | 0.4679 | 1.1516 | 1.1516 | 2.4410 |
| 2026 | 0.0 | 0.0405 | 0.0405 | 0.1576 | 0.1576 | 0.2763 | 0.2763 | 0.4608 | 0.4608 | 1.1344 | 1.1344 | 2.4043 |
| 2027 | 0.0 | 0.0399 | 0.0399 | 0.1552 | 0.1552 | 0.2721 | 0.2721 | 0.4539 | 0.4539 | 1.1174 | 1.1174 | 2.3683 |
| 2028 | 0.0 | 0.0393 | 0.0393 | 0.1529 | 0.1529 | 0.2681 | 0.2681 | 0.4471 | 0.4471 | 1.1006 | 1.1006 | 2.3328 |
| 2029 | 0.0 | 0.0387 | 0.0387 | 0.1506 | 0.1506 | 0.2640 | 0.2640 | 0.4404 | 0.4404 | 1.0841 | 1.0841 | 2.2978 |
| 2030 | 0.0 | 0.0381 | 0.0381 | 0.1483 | 0.1483 | 0.2601 | 0.2601 | 0.4338 | 0.4338 | 1.0678 | 1.0678 | 2.2633 |
| 2031 | 0.0 | 0.0376 | 0.0376 | 0.1461 | 0.1461 | 0.2562 | 0.2562 | 0.4273 | 0.4273 | 1.0518 | 1.0518 | 2.2293 |
| 2032 | 0.0 | 0.0370 | 0.0370 | 0.1439 | 0.1439 | 0.2523 | 0.2523 | 0.4209 | 0.4209 | 1.0360 | 1.0360 | 2.1959 |
| 2033 | 0.0 | 0.0364 | 0.0364 | 0.1417 | 0.1417 | 0.2485 | 0.2485 | 0.4146 | 0.4146 | 1.0205 | 1.0205 | 2.1630 |
| 2034 | 0.0 | 0.0359 | 0.0359 | 0.1396 | 0.1396 | 0.2448 | 0.2448 | 0.4084 | 0.4084 | 1.0052 | 1.0052 | 2.1305 |
| 2035 | 0.0 | 0.0354 | 0.0354 | 0.1375 | 0.1375 | 0.2411 | 0.2411 | 0.4022 | 0.4022 | 0.9901 | 0.9901 | 2.0986 |

**Table 13.** Coronary heart disease mortality rate (in %).[30-32]

| Year | <35    | 35-39  | 40-44  | 45-49  | 50-54  | 55-59  | 60-64  | 65-69  | 70-74  | 75-79  | 80-84  | 85+    |
|------|--------|--------|--------|--------|--------|--------|--------|--------|--------|--------|--------|--------|
| 2010 | 0.0000 | 0.5067 | 0.8506 | 0.9493 | 1.3778 | 1.4767 | 1.4179 | 1.1071 | 2.1109 | 2.2865 | 3.9970 | 9.4859 |
| 2011 | 0.0000 | 0.4960 | 0.8327 | 0.9293 | 1.3489 | 1.4457 | 1.3881 | 1.0839 | 2.0665 | 2.2385 | 3.9130 | 9.2867 |
| 2012 | 0.0000 | 0.4856 | 0.8152 | 0.9098 | 1.3205 | 1.4153 | 1.3590 | 1.0611 | 2.0231 | 2.1914 | 3.8309 | 9.0917 |
| 2013 | 0.0000 | 0.4754 | 0.7981 | 0.8907 | 1.2928 | 1.3856 | 1.3304 | 1.0388 | 1.9807 | 2.1454 | 3.7504 | 8.9007 |
| 2014 | 0.0000 | 0.4654 | 0.7813 | 0.8720 | 1.2657 | 1.3565 | 1.3025 | 1.0170 | 1.9391 | 2.1004 | 3.6717 | 8.7138 |
| 2015 | 0.0000 | 0.4557 | 0.7649 | 0.8537 | 1.2391 | 1.3280 | 1.2751 | 0.9956 | 1.8983 | 2.0563 | 3.5946 | 8.5308 |
| 2016 | 0.0000 | 0.4461 | 0.7489 | 0.8358 | 1.2131 | 1.3002 | 1.2484 | 0.9747 | 1.8585 | 2.0131 | 3.5191 | 8.3517 |
| 2017 | 0.0000 | 0.4367 | 0.7331 | 0.8182 | 1.1876 | 1.2728 | 1.2221 | 0.9543 | 1.8195 | 1.9708 | 3.4452 | 8.1763 |
| 2018 | 0.0000 | 0.4275 | 0.7177 | 0.8010 | 1.1626 | 1.2461 | 1.1965 | 0.9342 | 1.7812 | 1.9294 | 3.3728 | 8.0046 |
| 2019 | 0.0000 | 0.4186 | 0.7027 | 0.7842 | 1.1382 | 1.2199 | 1.1714 | 0.9146 | 1.7438 | 1.8889 | 3.3020 | 7.8365 |
| 2020 | 0.0000 | 0.4098 | 0.6879 | 0.7677 | 1.1143 | 1.1943 | 1.1468 | 0.8954 | 1.7072 | 1.8492 | 3.2326 | 7.6719 |
| 2021 | 0.0000 | 0.4012 | 0.6735 | 0.7516 | 1.0909 | 1.1692 | 1.1227 | 0.8766 | 1.6714 | 1.8104 | 3.1648 | 7.5108 |
| 2022 | 0.0000 | 0.3927 | 0.6593 | 0.7358 | 1.0680 | 1.1447 | 1.0991 | 0.8582 | 1.6363 | 1.7724 | 3.0983 | 7.3531 |
| 2023 | 0.0000 | 0.3845 | 0.6455 | 0.7204 | 1.0456 | 1.1207 | 1.0760 | 0.8402 | 1.6019 | 1.7352 | 3.0332 | 7.1987 |
| 2024 | 0.0000 | 0.3764 | 0.6319 | 0.7053 | 1.0236 | 1.0971 | 1.0534 | 0.8225 | 1.5683 | 1.6987 | 2.9695 | 7.0475 |
| 2025 | 0.0000 | 0.3685 | 0.6187 | 0.6905 | 1.0021 | 1.0741 | 1.0313 | 0.8052 | 1.5353 | 1.6631 | 2.9072 | 6.8995 |
| 2026 | 0.0000 | 0.3608 | 0.6057 | 0.6760 | 0.9811 | 1.0515 | 1.0096 | 0.7883 | 1.5031 | 1.6281 | 2.8461 | 6.7546 |
| 2027 | 0.0000 | 0.3532 | 0.5929 | 0.6618 | 0.9605 | 1.0294 | 0.9884 | 0.7718 | 1.4715 | 1.5939 | 2.7864 | 6.6128 |
| 2028 | 0.0000 | 0.3458 | 0.5805 | 0.6479 | 0.9403 | 1.0078 | 0.9677 | 0.7556 | 1.4406 | 1.5605 | 2.7278 | 6.4739 |
| 2029 | 0.0000 | 0.3385 | 0.5683 | 0.6343 | 0.9206 | 0.9867 | 0.9474 | 0.7397 | 1.4104 | 1.5277 | 2.6706 | 6.3380 |
| 2030 | 0.0000 | 0.3314 | 0.5564 | 0.6209 | 0.9012 | 0.9659 | 0.9275 | 0.7242 | 1.3808 | 1.4956 | 2.6145 | 6.2049 |
| 2031 | 0.0000 | 0.3245 | 0.5447 | 0.6079 | 0.8823 | 0.9457 | 0.9080 | 0.7090 | 1.3518 | 1.4642 | 2.5596 | 6.0746 |
| 2032 | 0.0000 | 0.3176 | 0.5332 | 0.5951 | 0.8638 | 0.9258 | 0.8889 | 0.6941 | 1.3234 | 1.4335 | 2.5058 | 5.9470 |
| 2033 | 0.0000 | 0.3110 | 0.5220 | 0.5826 | 0.8456 | 0.9064 | 0.8703 | 0.6795 | 1.2956 | 1.4034 | 2.4532 | 5.8221 |
| 2034 | 0.0000 | 0.3044 | 0.5111 | 0.5704 | 0.8279 | 0.8873 | 0.8520 | 0.6652 | 1.2684 | 1.3739 | 2.4017 | 5.6998 |
| 2035 | 0.0000 | 0.2981 | 0.5004 | 0.5584 | 0.8105 | 0.8687 | 0.8341 | 0.6513 | 1.2417 | 1.3450 | 2.3513 | 5.5801 |

**Table 14.** Type 2 diabetes incidence rate.[33,34]

| Age   | Incidence rate |
|-------|----------------|
| 20-24 | 0.000447       |
| 25-29 | 0.000762       |
| 30-34 | 0.001090       |
| 35-39 | 0.001625       |
| 40-44 | 0.002880       |
| 45-49 | 0.003575       |
| 50-54 | 0.004957       |
| 55-59 | 0.005071       |
| 60-64 | 0.004662       |
| 65-69 | 0.004450       |
| 70-74 | 0.003925       |
| 75-79 | 0.003609       |
| 80+   | 0.003240       |

**Table 15.** Type 2 diabetes mortality rate.[32-34]

| Age   | Mortality rate |
|-------|----------------|
| 20-24 | 0.006177       |
| 25-29 | 0.009399       |
| 30-34 | 0.009399       |
| 35-39 | 0.009399       |
| 40-44 | 0.009399       |
| 45-49 | 0.013706       |
| 50-54 | 0.013706       |
| 55-59 | 0.020137       |
| 60-64 | 0.020137       |
| 65-69 | 0.031904       |
| 70-74 | 0.031904       |
| 75-79 | 0.068313       |
| 80+   | 0.068313       |

Table 16. Non-disease related mortality rate (in %).[32]

| Year | 20-24 | 25-29 | 30-34 | 35-39 | 40-44 | 45-49 | 50-54 | 55-59 | 60-64 | 65-69 | 70-74 | 75-79 | 80-84 | 85+    |
|------|-------|-------|-------|-------|-------|-------|-------|-------|-------|-------|-------|-------|-------|--------|
| 2010 | 0.086 | 0.093 | 0.105 | 0.128 | 0.178 | 0.275 | 0.411 | 0.583 | 0.822 | 1.242 | 1.909 | 3.038 | 4.952 | 11.162 |
| 2011 | 0.086 | 0.093 | 0.105 | 0.125 | 0.174 | 0.269 | 0.403 | 0.571 | 0.797 | 1.205 | 1.851 | 2.947 | 4.804 | 10.828 |
| 2012 | 0.086 | 0.093 | 0.105 | 0.123 | 0.171 | 0.264 | 0.395 | 0.560 | 0.773 | 1.169 | 1.796 | 2.859 | 4.660 | 10.503 |
| 2013 | 0.086 | 0.093 | 0.105 | 0.120 | 0.167 | 0.259 | 0.387 | 0.548 | 0.750 | 1.133 | 1.742 | 2.773 | 4.520 | 10.188 |
| 2014 | 0.086 | 0.093 | 0.105 | 0.118 | 0.164 | 0.253 | 0.379 | 0.537 | 0.728 | 1.099 | 1.690 | 2.690 | 4.384 | 9.882  |
| 2015 | 0.086 | 0.093 | 0.105 | 0.115 | 0.161 | 0.248 | 0.372 | 0.527 | 0.706 | 1.066 | 1.639 | 2.609 | 4.253 | 9.586  |
| 2016 | 0.086 | 0.093 | 0.105 | 0.113 | 0.158 | 0.243 | 0.364 | 0.516 | 0.685 | 1.034 | 1.590 | 2.531 | 4.125 | 9.298  |
| 2017 | 0.086 | 0.093 | 0.105 | 0.111 | 0.154 | 0.239 | 0.357 | 0.506 | 0.664 | 1.003 | 1.542 | 2.455 | 4.002 | 9.019  |
| 2018 | 0.086 | 0.093 | 0.105 | 0.109 | 0.151 | 0.234 | 0.350 | 0.496 | 0.644 | 0.973 | 1.496 | 2.381 | 3.881 | 8.749  |
| 2019 | 0.086 | 0.093 | 0.105 | 0.106 | 0.148 | 0.229 | 0.343 | 0.486 | 0.625 | 0.944 | 1.451 | 2.310 | 3.765 | 8.486  |
| 2020 | 0.086 | 0.093 | 0.105 | 0.104 | 0.145 | 0.225 | 0.336 | 0.476 | 0.606 | 0.916 | 1.408 | 2.241 | 3.652 | 8.231  |
| 2021 | 0.086 | 0.093 | 0.105 | 0.102 | 0.142 | 0.220 | 0.329 | 0.467 | 0.588 | 0.888 | 1.365 | 2.173 | 3.543 | 7.985  |
| 2022 | 0.086 | 0.093 | 0.105 | 0.100 | 0.140 | 0.216 | 0.323 | 0.457 | 0.570 | 0.862 | 1.324 | 2.108 | 3.436 | 7.745  |
| 2023 | 0.086 | 0.093 | 0.105 | 0.098 | 0.137 | 0.211 | 0.316 | 0.448 | 0.553 | 0.836 | 1.285 | 2.045 | 3.333 | 7.513  |
| 2024 | 0.086 | 0.093 | 0.105 | 0.096 | 0.134 | 0.207 | 0.310 | 0.439 | 0.537 | 0.811 | 1.246 | 1.984 | 3.233 | 7.287  |
| 2025 | 0.086 | 0.093 | 0.105 | 0.094 | 0.131 | 0.203 | 0.304 | 0.430 | 0.521 | 0.786 | 1.209 | 1.924 | 3.136 | 7.069  |
| 2026 | 0.086 | 0.093 | 0.105 | 0.092 | 0.129 | 0.199 | 0.298 | 0.422 | 0.505 | 0.763 | 1.172 | 1.866 | 3.042 | 6.857  |
| 2027 | 0.086 | 0.093 | 0.105 | 0.090 | 0.126 | 0.195 | 0.292 | 0.413 | 0.490 | 0.740 | 1.137 | 1.810 | 2.951 | 6.651  |
| 2028 | 0.086 | 0.093 | 0.105 | 0.089 | 0.124 | 0.191 | 0.286 | 0.405 | 0.475 | 0.718 | 1.103 | 1.756 | 2.862 | 6.451  |
| 2029 | 0.086 | 0.093 | 0.105 | 0.087 | 0.121 | 0.187 | 0.280 | 0.397 | 0.461 | 0.696 | 1.070 | 1.703 | 2.776 | 6.258  |
| 2030 | 0.086 | 0.093 | 0.105 | 0.085 | 0.119 | 0.183 | 0.275 | 0.389 | 0.447 | 0.675 | 1.038 | 1.652 | 2.693 | 6.070  |
| 2031 | 0.086 | 0.093 | 0.105 | 0.083 | 0.116 | 0.180 | 0.269 | 0.381 | 0.434 | 0.655 | 1.007 | 1.603 | 2.612 | 5.888  |
| 2032 | 0.086 | 0.093 | 0.105 | 0.082 | 0.114 | 0.176 | 0.264 | 0.374 | 0.421 | 0.635 | 0.977 | 1.555 | 2.534 | 5.711  |
| 2033 | 0.086 | 0.093 | 0.105 | 0.080 | 0.112 | 0.173 | 0.258 | 0.366 | 0.408 | 0.616 | 0.947 | 1.508 | 2.458 | 5.540  |
| 2034 | 0.086 | 0.093 | 0.105 | 0.079 | 0.110 | 0.169 | 0.253 | 0.359 | 0.396 | 0.598 | 0.919 | 1.463 | 2.384 | 5.374  |
| 2035 | 0.086 | 0.093 | 0.105 | 0.077 | 0.107 | 0.166 | 0.248 | 0.352 | 0.384 | 0.580 | 0.891 | 1.419 | 2.313 | 5.213  |

Table 17. IHME health-adjusted life expectancy and discounted life expectancy for females. [94,95]

| Age of death | WHO HALE | Discounted by 3% | Age of death | WHO HALE | Discounted by 3% |
|--------------|----------|------------------|--------------|----------|------------------|
| 20           | 51.138   | 25.981           | 66           | 15.167   | 12.042           |
| 21           | 51.138   | 25.981           | 67           | 15.167   | 12.042           |
| 22           | 51.138   | 25.981           | 68           | 15.167   | 12.042           |
| 23           | 51.138   | 25.981           | 69           | 15.167   | 12.042           |
| 24           | 51.138   | 25.981           | 70           | 12.020   | 9.968            |
| 25           | 46.766   | 24.966           | 71           | 12.020   | 9.968            |
| 26           | 46.766   | 24.966           | 72           | 12.020   | 9.968            |
| 27           | 46.766   | 24.966           | 73           | 12.020   | 9.968            |
| 28           | 46.766   | 24.966           | 74           | 12.020   | 9.968            |
| 29           | 46.766   | 24.966           | 75           | 9.169    | 7.912            |
| 30           | 42.466   | 23.832           | 76           | 9.169    | 7.912            |
| 31           | 42.466   | 23.832           | 77           | 9.169    | 7.912            |
| 32           | 42.466   | 23.832           | 78           | 9.169    | 7.912            |
| 33           | 42.466   | 23.832           | 79           | 9.169    | 7.912            |
| 34           | 42.466   | 23.832           | 80           | 6.646    | 5.942            |
| 35           | 38.214   | 22.560           | 81           | 6.646    | 5.942            |
| 36           | 38.214   | 22.560           | 82           | 6.646    | 5.942            |
| 37           | 38.214   | 22.560           | 83           | 6.646    | 5.942            |
| 38           | 38.214   | 22.560           | 84           | 6.646    | 5.942            |
| 39           | 38.214   | 22.560           | 85           | 4.512    | 4.159            |
| 40           | 34.033   | 21.144           | 86           | 4.512    | 4.159            |
| 41           | 34.033   | 21.144           | 87           | 4.512    | 4.159            |
| 42           | 34.033   | 21.144           | 88           | 4.512    | 4.159            |
| 43           | 34.033   | 21.144           | 89           | 4.512    | 4.159            |
| 44           | 34.033   | 21.144           | 90           | 2.915    | 2.751            |
| 45           | 29.960   | 19.584           | 91           | 2.915    | 2.751            |
| 46           | 29.960   | 19.584           | 92           | 2.915    | 2.751            |
| 47           | 29.960   | 19.584           | 93           | 2.915    | 2.751            |
| 48           | 29.960   | 19.584           | 94           | 2.915    | 2.751            |
| 49           | 29.960   | 19.584           | 95           | 1.868    | 1.789            |
| 50           | 26.017   | 17.884           | 96           | 1.868    | 1.789            |
| 51           | 26.017   | 17.884           | 97           | 1.868    | 1.789            |
| 52           | 26.017   | 17.884           | 98           | 1.868    | 1.789            |
| 53           | 26.017   | 17.884           | 99           | 1.868    | 1.789            |
| 54           | 26.017   | 17.884           | 100          | 1.231    | 1.189            |
| 55           | 22.214   | 16.045           | 101          | 1.231    | 1.189            |
| 56           | 22.214   | 16.045           | 102          | 1.231    | 1.189            |
| 57           | 22.214   | 16.045           | 103          | 1.231    | 1.189            |
| 58           | 22.214   | 16.045           | 104          | 1.231    | 1.189            |
| 59           | 22.214   | 16.045           | 105          | 1.000    | 0.971            |
| 60           | 18.574   | 14.081           | 106          | 1.000    | 0.971            |
| 61           | 18.574   | 14.081           | 107          | 1.000    | 0.971            |
| 62           | 18.574   | 14.081           | 108          | 1.000    | 0.971            |
| 63           | 18.574   | 14.081           | 109          | 1.000    | 0.971            |
| 64           | 18.574   | 14.081           | 110          | 1.000    | 0.971            |
| 65           | 15.167   | 12.042           |              |          |                  |

**Table 18.** IHME health-adjusted life expectancy and discounted life expectancy for males.[94,95]

| Age of death | WHO HALE | Discounted by 3% | Age of death | WHO HALE | Discounted by 3% |
|--------------|----------|------------------|--------------|----------|------------------|
| 20           | 48.035   | 25.275           | 66           | 13.080   | 10.688           |
| 21           | 48.035   | 25.275           | 67           | 13.080   | 10.688           |
| 22           | 48.035   | 25.275           | 68           | 13.080   | 10.688           |
| 23           | 48.035   | 25.275           | 69           | 13.080   | 10.688           |
| 24           | 48.035   | 25.275           | 70           | 10.208   | 8.680            |
| 25           | 43.802   | 24.200           | 71           | 10.208   | 8.680            |
| 26           | 43.802   | 24.200           | 72           | 10.208   | 8.680            |
| 27           | 43.802   | 24.200           | 73           | 10.208   | 8.680            |
| 28           | 43.802   | 24.200           | 74           | 10.208   | 8.680            |
| 29           | 43.802   | 24.200           | 75           | 7.680    | 6.767            |
| 30           | 39.589   | 22.989           | 76           | 7.680    | 6.767            |
| 31           | 39.589   | 22.989           | 77           | 7.680    | 6.767            |
| 32           | 39.589   | 22.989           | 78           | 7.680    | 6.767            |
| 33           | 39.589   | 22.989           | 79           | 7.680    | 6.767            |
| 34           | 39.589   | 22.989           | 80           | 5.524    | 5.019            |
| 35           | 35.374   | 21.616           | 81           | 5.524    | 5.019            |
| 36           | 35.374   | 21.616           | 82           | 5.524    | 5.019            |
| 37           | 35.374   | 21.616           | 83           | 5.524    | 5.019            |
| 38           | 35.374   | 21.616           | 84           | 5.524    | 5.019            |
| 39           | 35.374   | 21.616           | 85           | 3.723    | 3.471            |
| 40           | 31.217   | 20.085           | 86           | 3.723    | 3.471            |
| 41           | 31.217   | 20.085           | 87           | 3.723    | 3.471            |
| 42           | 31.217   | 20.085           | 88           | 3.723    | 3.471            |
| 43           | 31.217   | 20.085           | 89           | 3.723    | 3.471            |
| 44           | 31.217   | 20.085           | 90           | 2.388    | 2.269            |
| 45           | 27.195   | 18.412           | 91           | 2.388    | 2.269            |
| 46           | 27.195   | 18.412           | 92           | 2.388    | 2.269            |
| 47           | 27.195   | 18.412           | 93           | 2.388    | 2.269            |
| 48           | 27.195   | 18.412           | 94           | 2.388    | 2.269            |
| 49           | 27.195   | 18.412           | 95           | 1.521    | 1.462            |
| 50           | 23.347   | 16.614           | 96           | 1.521    | 1.462            |
| 51           | 23.347   | 16.614           | 97           | 1.521    | 1.462            |
| 52           | 23.347   | 16.614           | 98           | 1.521    | 1.462            |
| 53           | 23.347   | 16.614           | 99           | 1.521    | 1.462            |
| 54           | 23.347   | 16.614           | 100          | 1.000    | 0.971            |
| 55           | 19.705   | 14.714           | 101          | 1.000    | 0.971            |
| 56           | 19.705   | 14.714           | 102          | 1.000    | 0.971            |
| 57           | 19.705   | 14.714           | 103          | 1.000    | 0.971            |
| 58           | 19.705   | 14.714           | 104          | 1.000    | 0.971            |
| 59           | 19.705   | 14.714           | 105          | 1.000    | 0.971            |
| 60           | 16.256   | 12.716           | 106          | 1.000    | 0.971            |
| 61           | 16.256   | 12.716           | 107          | 1.000    | 0.971            |
| 62           | 16.256   | 12.716           | 108          | 1.000    | 0.971            |
| 63           | 16.256   | 12.716           | 109          | 1.000    | 0.971            |
| 64           | 16.256   | 12.716           | 110          | 1.000    | 0.971            |
| 65           | 13.080   | 10.688           |              |          |                  |

## References

1. U.S. Census Bureau, Population Division. Population Estimates. Accessed on <http://www.census.gov/popest/index.html> at Apr 23, 2015.
2. Browning JD, Szczepaniak LS, Dobbins R, Nuremberg P, Horton JD, Cohen JC, et al. Prevalence of hepatic steatosis in an urban population in the United States: impact of ethnicity. *Hepatology*. 2004 Dec;40(6):1387-95.
3. Mahady SE, George J. Management of nonalcoholic steatohepatitis: an evidence-based approach. *Clin Liver Dis*. 2012 Aug;16(3):631-45. doi: 10.1016/j.cld.2012.05.003.
4. Williams CD, Stengel J, Asike MI, Torres DM, Shaw J, Contreras M, et al. Prevalence of non-alcoholic fatty liver disease and nonalcoholic steatohepatitis among a largely middle-aged population utilizing ultrasound and liver biopsy: a prospective study. *Gastroenterology*. 2011 Jan;140(1):124-31. doi: 10.1053/j.gastro.2010.09.038.
5. Chalasani N(1), Younossi Z, Lavine JE, Diehl AM, Brunt EM, Cusi K, et al. The diagnosis and management of non-alcoholic fatty liver disease: practice guideline by the American Gastroenterological Association, American Association for the Study of Liver Diseases, and American College of Gastroenterology. *Gastroenterology*. 2012 Jun;142(7):1592-609. doi: 10.1053/j.gastro.2012.04.001.
6. Adams LA, Lymp JF, St Sauver J, Sanderson SO, Lindor KD, Feldstein A, et al. The natural history of nonalcoholic fatty liver disease: a population-based cohort study. *Gastroenterology*. 2005 Jul;129(1):113-21.
7. Ascha MS, Hanouneh IA, Lopez R, Tamimi TA, Feldstein AF, Zein NN. The incidence and risk factors of hepatocellular carcinoma in patients with nonalcoholic steatohepatitis. *Hepatology*. 2010 Jun;51(6):1972-8. doi: 10.1002/hep.23527.
8. Bambha K, Belt P, Abraham M, Wilson LA, Pabst M, Ferrell L, et al; Nonalcoholic Steatohepatitis Clinical Research Network Research Group. Ethnicity and nonalcoholic fatty liver disease. *Hepatology*. 2012 Mar;55(3):769-80. doi: 10.1002/hep.24726.
9. Michelotti GA, Machado MV, Diehl AM. NAFLD, NASH and liver cancer. *Nat Rev Gastroenterol Hepatol*. 2013 Nov;10(11):656-65. doi: 10.1038/nrgastro.2013.183.
10. Page JM, Harrison SA. NASH and HCC. *Clin Liver Dis*. 2009 Nov;13(4):631-47. doi: 10.1016/j.cld.2009.07.007.
11. Centers for Disease Control and Prevention. National Center for Health Statistics. Health Data Interactive. Accessed at [www.cdc.gov/nchs/hdi.htm](http://www.cdc.gov/nchs/hdi.htm) on Apr 23, 2015.
12. Centers for Disease Control and Prevention. National Center for Health Statistics. National Health and Nutrition Examination Survey Data. Hyattsville, MD: U.S. Department of Health and Human Services, Centers for Disease Control and Prevention. 2005-2012. <http://www.cdc.gov/nchs/nhanes.htm>.
13. Rodriguez LA, Madsen KA, Auinger P, Bremer AA, Lustig RH. Added sugar intake and metabolic syndrome risk in US adolescents: cross-sectional analysis of NHANES 2005-2012. *Journal for Public Health Nutrition*. 2015. [Currently under review].
14. Anstee QM, Targher G, Day CP. Progression of NAFLD to diabetes mellitus, cardiovascular disease or cirrhosis. *Nat Rev Gastroenterol Hepatol*. 2013 Jun;10(6):330-44. doi: 10.1038/nrgastro.2013.41.
15. Bruno S, Maisonneuve P, Castellana P, Rotmensz N, Rossi S, Maggioni M, et al. Incidence and risk factors for non-alcoholic steatohepatitis: prospective study of 5408 women enrolled in Italian tamoxifen chemoprevention trial. *BMJ*. 2005 Apr 23;330(7497):932.
16. Ekstedt M, Franzén LE, Mathiesen UL, Thorelius L, Holmqvist M, Bodemar G, et al. Long-term follow-up of patients with NAFLD and elevated liver enzymes. *Hepatology*. 2006 Oct;44(4):865-73.
17. Haukeland JW, Lorgen I, Schreiner LT, Frigstad SO, Brandsaeter B, Bjørø K, et al. Incidence rates and causes of cirrhosis in a Norwegian population. *Scand J Gastroenterol*. 2007 Dec;42(12):1501-8.
18. Musso G, Cassader M, Bo S, De Michieli F, Gambino R. Sterol regulatory element-binding factor 2 (SREBF-2) predicts 7-year NAFLD incidence and severity of liverdisease and lipoprotein and glucose dysmetabolism. *Diabetes*. 2013 Apr;62(4):1109-20. doi: 10.2337/db12-0858.
19. Omagari K, Kadokawa Y, Masuda J, Egawa I, Sawa T, Hazama H, et al. Fatty liver in non-alcoholic non-overweight Japanese adults: incidence and clinical characteristics. *J Gastroenterol Hepatol*. 2002 Oct;17(10):1098-105.
20. Rafiq N, Bai C, Fang Y, Srishord M, McCullough A, Gramlich T, et al. Long-term follow-up of patients with nonalcoholic fatty liver. *Clin Gastroenterol Hepatol*. 2009 Feb;7(2):234-8. doi: 10.1016/j.cgh.2008.11.005.
21. Wong VW, Wong GL, Yeung DK, Lau TK, Chan CK, Chim AM, et al. Incidence of non-alcoholic fatty liver disease in Hong Kong: a population study with paired proton-magnetic resonance spectroscopy. *J Hepatol*. 2015 Jan;62(1):182-9. doi: 10.1016/j.jhep.2014.08.041.
22. Zelber-Sagi S1, Lotan R, Shlomai A, Webb M, Harrari G, Buch A, et al. Predictors for incidence and remission of NAFLD in the general population during a seven-year prospective follow-up. *J Hepatol*. 2012 May;56(5):1145-51. doi: 10.1016/j.jhep.2011.12.011.
23. Kawamura Y, Arase Y, Ikeda K, Seko Y, Imai N, Hosaka T, et al. Large-scale long-term follow-up study of Japanese patients with non-alcoholic Fatty liver disease for the onset of hepatocellular carcinoma. *Am J Gastroenterol*. 2012 Feb;107(2):253-61. doi: 10.1038/ajg.2011.327.
24. Njei B, Rotman Y, Ditah I, Lim JK. Emerging trends in hepatocellular carcinoma incidence and mortality. *Hepatology*. 2015 Jan;61(1):191-9. doi: 10.1002/hep.27388.
25. El-Serag HB, Mason AC. Rising incidence of hepatocellular carcinoma in the United States. *N Engl J Med*. 1999 Mar 11;340(10):745-50.
26. Lazo M, Hernaez R, Bonekamp S, Kamel IR, Brancati FL, Guallar E, et al. Non-alcoholic fatty liver disease and mortality among US adults: prospective cohort study. *BMJ*. 2011 Nov 18;343:d6891. doi: 10.1136/bmj.d6891.
27. Stepanova M, Rafiq N, Makhlof H, Agrawal R, Kaur I, Younoszai Z, et al. Predictors of all-cause mortality and liver-related mortality in patients with non-alcoholic fatty liver disease (NAFLD). *Dig Dis Sci*. 2013 Oct;58(10):3017-23. doi: 10.1007/s10620-013-2743-5.
28. Söderberg C, Stål P, Askling J, Glaumann H, Lindberg G, Marmur J, et al. Decreased survival of subjects with elevated liver function tests during a 28-year follow-up. *Hepatology*. 2010 Feb;51(2):595-602. doi: 10.1002/hep.23314.
29. Haflidadottir S, Jonasson JG, Norland H, Einarsdottir SO, Kleiner DE, Lund SH. Long-term follow-up and liver-related death rate in patients with non-alcoholic and alcoholic related fatty liverdisease. *BMC Gastroenterol*. 2014 Sep 27;14:166. doi: 10.1186/1471-230X-14-166.
30. National Heart, Lung, and Blood Institute . *Morbidity & Mortality: 2012 Chart Book on Cardiovascular, Lung, and Blood Diseases*. National Institutes of Health. National Heart, Lung, and Blood Institute. 2012.
31. National Heart, Lung, and Blood Institute . *Incidence and Prevalence: 2006 Chart Book on Cardiovascular and Lung Diseases*. National Institutes of Health. National Heart, Lung, and Blood Institute. 2006.
32. Centers for Disease Control and Prevention. National Center for Health Statistics. Underlying Cause of Death 1999-2013 on CDC WONDER Online

- Database, released 2015. Data are from the Multiple Cause of Death Files, 1999-2013, as compiled from data provided by the 57 vital statistics jurisdictions through the Vital Statistics Cooperative Program. Accessed at <http://wonder.cdc.gov/ucd-icd10.html> on Apr 16, 2015.
33. Geiss LS, Wang J, Cheng YJ, Thompson TJ, Barker L, Li Y, et al. Prevalence and incidence trends for diagnosed diabetes among adults aged 20 to 79 years, United States, 1980-2012. *JAMA*. 2014 Sep 24;312(12):1218-26. doi: 10.1001/jama.2014.11494.
34. Fishman EI, Stokes A, Preston SH. The dynamics of diabetes among birth cohorts in the U.S. *Diabetes Care*. 2014 Apr;37(4):1052-9. doi: 10.2337/dc13-1982.
35. Daouli J, Davillas A, Demoussis M, Giannakopoulos N. Obesity persistence and duration dependence: evidence from a cohort of US adults (1985-2010). *Econ Hum Biol*. 2014 Jan;12:30-44. doi: 10.1016/j.ehb.2013.07.002.
36. Gordon-Larsen P, Adair LS, Nelson MC, Popkin BM. Five-year obesity incidence in the transition period between adolescence and adulthood: the National Longitudinal Study of Adolescent Health. *Am J Clin Nutr*. 2004 Sep;80(3):569-75.
37. Parikh NI, Pencina MJ, Wang TJ, Lanier KJ, Fox CS, D'Agostino RB, et al. Increasing trends in incidence of overweight and obesity over 5 decades. *Am J Med*. 2007 Mar;120(3):242-50.
38. Williamson DF, Kahn HS, Byers T. The 10-y incidence of obesity and major weight gain in black and white US women aged 30-55 y. *Am J Clin Nutr*. 1991 Jun;53(6 Suppl):1515S-1518S.
39. Schneider ALC, Lazo M, Selvin E, Clark JM. Racial differences in nonalcoholic fatty liver disease in the U.S. population. *Obesity (Silver Spring)*. 2014;22(1):292-299. doi:10.1002/oby.20426.
40. Kelishadi R, Cook SR, Adibi A, Faghihimani Z, Ghatrehsamani S, Beihaghi A, et al. Association of the components of the metabolic syndrome with non-alcoholic fatty liver disease among normal-weight, overweight and obese children and adolescents. *Diabetol Metab Syndr*. 2009 Dec 22;1:29. doi: 10.1186/1758-5996-1-29.
41. Peng L, Wang J, Li F. Weight reduction for non-alcoholic fatty liver disease. *Cochrane Database Syst Rev*. 2011 Jun 15;(6):CD003619. doi: 10.1002/14651858.CD003619.pub3.
42. Dassanayake AS, Kasturiratne A, Rajindrajith S, Kalubowila U, Chakravarthi S, De Silva AP, et al. Prevalence and risk factors for non-alcoholic fatty liver disease among adults in an urban Sri Lankan population. *J Gastroenterol Hepatol*. 2009 Jul;24(7):1284-8. doi: 10.1111/j.1440-1746.2009.05831.x.
43. Lee K, Sung JA, Kim JS, Park TJ. The roles of obesity and gender on the relationship between metabolic risk factors and non-alcoholic fatty liver disease in Koreans. *Diabetes Metab Res Rev*. 2009 Feb;25(2):150-5. doi: 10.1002/dmrr.924.
44. Zeb I, Katz R, Nasir K, Ding J, Rezaeian P, Budoff MJ. Relation of nonalcoholic fatty liver disease to the metabolic syndrome: the Multi-Ethnic Study of Atherosclerosis. *J Cardiovasc Comput Tomogr*. 2013 Sep-Oct;7(5):311-8. doi: 10.1016/j.jct.2013.08.011.
45. Chan WK, Tan AT, Vethakkan SR, Tah PC, Vijayanathan A, Goh KL. Non-alcoholic fatty liver disease in diabetics -prevalence and predictive factors in a multiracial hospital clinic population in Malaysia. *J Gastroenterol Hepatol*. 2013 Aug;28(8):1375-83. doi: 10.1111/jgh.12204.
46. Papandreou D, Karabouta Z, Pantoleon A, Rousso I. Investigation of anthropometric, biochemical and dietary parameters of obese children with and without non-alcoholic fatty liver disease. *Appetite*. 2012 Dec;59(3):939-44. doi: 10.1016/j.appet.2012.09.006.
47. Abid A, Taha O, Nseir W, Farah R, Grosovski M, Assy N. Soft drink consumption is associated with fatty liver disease independent of metabolic syndrome. *J Hepatol*. 2009 Nov;51(5):918-24. doi: 10.1016/j.jhep.2009.05.033.
48. Wong VW, Wong GL, Yip GW, Lo AO, Limquiao J, Chu WC, et al. Coronary artery disease and cardiovascular outcomes in patients with non-alcoholic fatty liver disease. *Gut*. 2011 Dec;60(12):1721-7. doi: 10.1136/gut.2011.242016.
49. Hamaguchi M, Kojima T, Takeda N, Nagata C, Takeda J, Sarui H, et al. Nonalcoholic fatty liver disease is a novel predictor of cardiovascular disease. *World J Gastroenterol*. 2007 Mar 14;13(10):1579-84.
50. Fan JG, Li F, Cai XB, Peng YD, Ao QH, Gao Y. Effects of nonalcoholic fatty liver disease on the development of metabolic disorders. *J Gastroenterol Hepatol*. 22, 1086-1091 (2007).
51. Targher G, Bertolini L, Rodella S, Tessari R, Zenari L, Lippi G, et al. Nonalcoholic fatty liver disease is independently associated with an increased incidence of cardiovascular events in type 2 diabetic patients. *Diabetes Care* 30, 2119-2121 (2007).
52. Treeprasertsuk S, Leverage S, Adams LA, Lindor KD, St Sauver J, Angulo P. The Framingham risk score and heart disease in nonalcoholic fatty liver disease. *Liver Int*. 32, 945-950 (2012).
53. Canoy D, Cairns BJ, Balkwill A, Wright FL, Green J, Reeves G, et al. Body mass index and incident coronary heart disease in women: a population-based prospective study. *BMC Med*. 2013 Apr 2;11:87. doi: 10.1186/1741-7015-11-87.
54. Global Burden of Metabolic Risk Factors for Chronic Diseases Collaboration (BMI Mediated Effects), Lu Y, Hajifathalian K, Ezzati M, Woodward M, Rimm EB, Danaei G. Metabolic mediators of the effects of body-mass index, overweight, and obesity on coronary heart disease and stroke: a pooled analysis of 97 prospective cohorts with 1.8 million participants. *Lancet*. 2014 Mar 15;383(9921):970-83. doi: 10.1016/S0140-6736(13)61836-X.
55. Gruson E, Montaye M, Kee F, Wagner A, Bingham A, Ruidavets JB, et al. Anthropometric assessment of abdominal obesity and coronary heart disease risk in men: the PRIME study. *Heart*. 2010 Jan;96(2):136-40. doi: 10.1136/hrt.2009.171447.
56. de Hollander EL, Bogers RP, Boshuizen HC, Rosengren A, Shipley MJ, Knekt P, et al. Influence of calendar period on the association between BMI and coronary heart disease: a meta-analysis of 31 cohorts. *Obesity (Silver Spring)*. 2013 May;21(5):865-80. doi: 10.1002/oby.20043.
57. Labounty TM, Gomez MJ, Achenbach S, Al-Mallah M, Berman DS, Budoff MJ, et al. Body mass index and the prevalence, severity, and risk of coronary artery disease: an international multicentre study of 13,874 patients. *Eur Heart J Cardiovasc Imaging*. 2013 May;14(5):456-63. doi: 10.1093/ehjci/jes179.
58. Mongraw-Chaffin ML, Peters SA, Huxley RR, Woodward M. The sex-specific association between BMI and coronary heart disease: a systematic review and meta-analysis of 95 cohorts with 1.2 million participants. *Lancet Diabetes Endocrinol*. 2015 Jun;3(6):437-49. doi: 10.1016/S2213-8587(15)00086-8.
59. Park YS, Kim JS. Obesity phenotype and coronary heart disease risk as estimated by the Framingham risk score. *J Korean Med Sci*. 2012 Mar;27(3):243-9. doi: 10.3346/jkms.2012.27.3.243.
60. Taylor AE, Ebrahim S, Ben-Shlomo Y, Martin RM, Whincup PH, Yarnell JW, et al. Comparison of the associations of body mass index and measures of central adiposity and fat mass with coronary heart disease, diabetes, and all-cause mortality: a study using data from 4 UK cohorts. *Am J Clin Nutr*. 2010 Mar;91(3):547-56. doi: 10.3945/ajcn.2009.28757.
61. Peters SA, Huxley RR, Woodward M. Diabetes as risk factor for incident coronary heart disease in women compared with men: a systematic review and meta-analysis of 64 cohorts including 858,507 individuals and 28,203 coronary events. *Diabetologia*.

- 2014 Aug;57(8):1542-51. doi: 10.1007/s00125-014-3260-6.
62. Shibata M, Kihara Y, Taguchi M, Tashiro M, Otsuki M. Nonalcoholic fatty liver disease is a risk factor for type 2 diabetes in middle-aged Japanese men. *Diabetes Care* 30, 2940–2944 (2007).
  63. Kim CH, Park JY, Lee KU, Kim JH, Kim HK. Fatty liver is an independent risk factor for the development of Type 2 diabetes in Korean adults. *Diabet. Med.* 25, 476–481 (2008).
  64. Yamada T, Fukatsu M, Suzuki S, Wada T, Yoshida T, Joh T. Fatty liver predicts impaired fasting glucose and type 2 diabetes mellitus in Japanese undergoing a health checkup. *J. Gastroenterol. Hepatol.* 25, 352–356 (2010).
  65. Sung KC, Kim SH. Interrelationship between fatty liver and insulin resistance in the development of type 2 diabetes. *J. Clin. Endocrinol. Metab.* 96, 1093–1097 (2011).
  66. Bae JC, Rhee EJ, Lee WY, Park SE, Park CY, Oh KW, et al. Combined effect of nonalcoholic fatty liver disease and impaired fasting glucose on the development of type 2 diabetes: a 4 year retrospective longitudinal study. *Diabetes Care* 34, 727–729 (2011).
  67. Sung KC, Jeong WS, Wild SH, Byrne CD. Combined influence of insulin resistance, overweight/obesity, and fatty liver as risk factors for type 2 diabetes. *Diabetes Care* 35, 717–722 (2012).
  68. Kasturiratne A, Weerasinghe S, Dassanayake AS, Rajindrajith S, de Silva AP, Kato N, et al. Influence of non-alcoholic fatty liver disease on the development of diabetes mellitus. *J Gastroenterol Hepatol.* 2013 Jan;28(1):142-7. doi: 10.1111/j.1440-1746.2012.07264.x.
  69. Abdullah A, Peeters A, de Courten M, Stoelwinder J. The magnitude of association between overweight and obesity and the risk of diabetes: a meta-analysis of prospective cohort studies. *Diabetes Res Clin Pract.* 2010 Sep;89(3):309-19. doi: 10.1016/j.diabetes.2010.04.012.
  70. Nyamdorj R, Qiao Q, Söderberg S, Pitkaniemi JM, Zimmet PZ, Shaw JE, et al. BMI compared with central obesity indicators as a predictor of diabetes incidence in Mauritius. *Obesity (Silver Spring)*. 2009 Feb;17(2):342-8. doi: 10.1038/oby.2008.503.
  71. Rolando L, Byrne DW, McGown PW, Goetzel RZ, Elasy TA, Yarbrough MI. Health risk factor modification predicts incidence of diabetes in an employee population: results of an 8-year longitudinal cohort study. *J Occup Environ Med.* 2013 Apr;55(4):410-5. doi: 10.1097/JOM.0b013e31827cbaec.
  72. Rodbard HW, Bays HE, Gavin JR 3rd, Green AJ, Bazata DD, Lewis SJ, et al. Rate and risk predictors for development of self-reported type-2 diabetes mellitus over a 5-year period: the SHIELD study. *Int J Clin Pract.* 2012 Jul;66(7):684-91. doi: 10.1111/j.1742-1241.2012.02952.x.
  73. Kodama S, Horikawa C, Fujihara K, Yoshizawa S, Yachi Y, Tanaka S, et al. Quantitative relationship between body weight gain in adulthood and incident type 2 diabetes: a meta-analysis. *Obes Rev.* 2014 Mar;15(3):202-14. doi: 10.1111/obr.12129.
  74. Bell JA, Kivimaki M, Hamer M. Metabolically healthy obesity and risk of incident type 2 diabetes: a meta-analysis of prospective cohort studies. *Obes Rev.* 2014 Jun;15(6):504-15. doi: 10.1111/obr.12157.
  75. Guh DP, Zhang W, Bansback N, Amarsi Z, Birmingham CL, Anis AH. The incidence of co-morbidities related to obesity and overweight: a systematic review and meta-analysis. *BMC Public Health.* 2009 Mar 25;9:88. doi: 10.1186/1471-2458-9-88.
  76. Emond JA, Patterson RE, Jardack PM, Arab L. Using doubly labeled water to validate associations between sugar-sweetened beverage intake and body mass among White and African-American adults. *Int J Obes (Lond)*. 2014 Apr;38(4):603-9. doi: 10.1038/ijo.2013.130.
  77. Grimes CA, Riddell LJ, Campbell KJ, Nowson CA. Dietary salt intake, sugar-sweetened beverage consumption, and obesity risk. *Pediatrics.* 2013 Jan;131(1):14-21. doi: 10.1542/peds.2012-1628.
  78. Parikh NI, Gona P, Larson MG, Fox CS, Benjamin EJ, Murabito JM, et al. Long-term trends in myocardial infarction incidence and case fatality in the National Heart, Lung, and Blood Institute's Framingham Heart study. *Circulation.* 2009;119:1203–1210.
  79. Floyd KC, Yarzebski J, Spencer FA, Lessard D, Dalen JE, Alpert JS, et al. A 30-year perspective (1975–2005) into the changing landscape of patients hospitalized with initial acute myocardial infarction: Worcester Heart Attack Study. *Circ Cardiovasc Qual Outcomes.* 2009;2:88–95.
  80. Roger VL, Weston SA, Gerber Y, Killian JM, Dunlay SM, Jaffe AS, et al. Trends in incidence, severity, and outcome of hospitalized myocardial infarction. *Circulation.* 2010;121:863–869.
  81. Yeh RW, Sidney S, Chandra M, Sorel M, Selby JV, Go AS. Population trends in the incidence and outcomes of acute myocardial infarction. *N Engl J Med.* 2010;362:2155–2165.
  82. Foster T, Anania FA, Li D, Katz R, Budoff M. The prevalence and clinical correlates of nonalcoholic fatty liver disease (NAFLD) in African Americans: the multi ethnic study of atherosclerosis (MESA). *Dig Dis Sci.* 2013 Aug;58(8):2392-8. doi: 10.1007/s10620-013-2652-7.
  83. Farrell GC, Larter CZ. Nonalcoholic fatty liver disease: from steatosis to cirrhosis. *Hepatology.* 2006 Feb;43(2 Suppl 1):S99-S112.
  84. Zhang E1, Wartelle-Bladou C, Lepanto L, Lachaine J, Cloutier G, Tang A. Cost-utility analysis of nonalcoholic steatohepatitis screening. *Eur Radiol.* 2015 May 21. [Epub ahead of print]
  85. Baumeister SE1, Völzke H, Marschall P, John U, Schmidt CO, Flessa S, et al. Impact of fatty liver disease on health care utilization and costs in a general population: a 5-year observation. *Gastroenterology.* 2008 Jan;134(1):85-94.
  86. McAdam-Marx C1, McGarry LJ, Hane CA, Biskupiak J, Deniz B, Brixner DI. All-cause and incremental per patient per year cost associated with chronic hepatitis C virus and associated liver complications in the United States: a managed care perspective. *J Manag Care Pharm.* 2011 Sep;17(7):531-46.
  87. Patel D, Terrault NA, Yao FY, Bass NM, Ladaabaum U. Cost-effectiveness of hepatocellular carcinoma surveillance in patients with hepatitis C virus-related cirrhosis. *Clin Gastroenterol Hepatol.* 2005 Jan;3(1):75-84.
  88. Thein HH, Isaranuwatthai W, Campitelli MA, Feld JJ, Yoshida E, Sherman M, et al. Health care costs associated with hepatocellular carcinoma: a population-based study. *Hepatology.* 2013 Oct;58(4):1375-84. doi: 10.1002/hep.26231. Epub 2013 Mar 15.
  89. Lightwood J, Bibbins-Domingo K, Coxson P, Wang YC, Williams L, Goldman L. Forecasting the future economic burden of current adolescent overweight: an estimate of the coronary heart disease policy model. *Am J Public Health.* 2009 Dec;99(12):2230-7. doi: 10.2105/AJPH.2008.152595.
  90. American Diabetes Association. Economic costs of diabetes in the U.S. in 2012. *Diabetes Care.* 2013 Apr;36(4):1033-46. doi: 10.2337/dc12-2625.
  91. Li Q, Blume SW, Huang JC, Hammer M, Graf TR. The Economic Burden of Obesity by Glycemic Stage in the United States. *Pharmacoeconomics.* 2015 Jul;33(7):735-48. doi: 10.1007/s40273-014-0248-5.
  92. Murray CJ, Vos T, Lozano R, Naghavi M, Flaxman AD, Michaud C, et al. Disability-adjusted life years (DALYs) for 291 diseases and injuries in 21 regions, 1990–2010: a systematic analysis for the Global Burden of Disease Study 2010. *Lancet.* 2012 Dec 15;380(9859):2197-223. doi: 10.1016/S0140-6736(12)61689-4.
  93. Keating CL1, Peeters A, Swinburn BA, Magliano DJ, Moodie ML. Utility-based quality of life associated with overweight and obesity: the Australian

- 1  
2  
3 diabetes, obesity, and lifestyle study.  
4 Obesity (Silver Spring). 2013  
5 Mar;21(3):652-5. doi:  
6 10.1002/oby.20290.
94. Global Health Data Exchange. Global  
7 Burden of Disease Study 2010 (GBD  
8 2010) Life Expectancy and Healthy Life  
9
- Expectancy 1970-2010. Institute for  
10 Health Metrics and Evaluation.  
11 Accessed at  
12 <http://ghdx.healthdata.org/record/global-burden-disease-study-2010-gbd-2010-life-expectancy-and-healthy-life-expectancy-1970> on Apr 23, 2015.
95. Murray CJ, Ezzati M, Flaxman AD, Lim S,  
13 Lozano R, Michaud C, GBD 2010: design,  
14 definitions, and metrics. Lancet. 2012  
15 Dec 15;380(9859):2063-6. doi:  
16 10.1016/S0140-6736(12)61899-6.
- 17  
18  
19  
20  
21  
22  
23  
24  
25  
26  
27  
28  
29  
30  
31  
32  
33  
34  
35  
36  
37  
38  
39  
40  
41  
42  
43  
44  
45  
46  
47  
48  
49  
50  
51  
52  
53  
54  
55  
56  
57  
58  
59  
60

For peer review only

## Additional file 1

EVEREST Statement: Checklist for health economics paper

|                                                                                                                                                | Study section                                | Additional remarks                                                     |
|------------------------------------------------------------------------------------------------------------------------------------------------|----------------------------------------------|------------------------------------------------------------------------|
| <b>Study design</b>                                                                                                                            |                                              |                                                                        |
| (1) The research question is stated                                                                                                            | Introduction                                 | Page 2                                                                 |
| (2) The economic importance of the research question is stated                                                                                 | Introduction                                 | Page 2                                                                 |
| (3) The viewpoint(s) of the analysis are clearly stated and justified                                                                          | Introduction, Methods                        | Page 2 and page 4-5 (interventions)                                    |
| (4) The rationale for choosing the alternative programmes or interventions compared is stated                                                  | Methods                                      | Page 4-5 (interventions)                                               |
| (5) The alternatives being compared are clearly described                                                                                      | Methods                                      | Page 4-5 (interventions)                                               |
| (6) The form of economic evaluation used is stated                                                                                             | Methods                                      | Page 3                                                                 |
| (7) The choice of form of economic evaluation is justified in relation to the questions addressed                                              | Introduction, Methods                        | Page 3                                                                 |
|                                                                                                                                                |                                              |                                                                        |
| <b>Data collection</b>                                                                                                                         |                                              |                                                                        |
| (8) The source(s) of effectiveness estimates used are stated                                                                                   | Methods; Table 1, Table 2                    | Page 5 and 6                                                           |
| (9) Details of the design and results of effectiveness study are given (if based on single study)                                              | N/A                                          | Data derived from peer reviewed literature and national health surveys |
| (10) Details of the method of synthesis or meta-analysis of estimates are given (if based on an overview of a number of effectiveness studies) | Methods                                      | Page 6                                                                 |
| (11) The primary outcome measure(s) for the economic evaluation are clearly stated                                                             | Methods                                      | Page 5                                                                 |
| (12) Methods to value health states and other benefits are stated                                                                              | Methods                                      | Page 5; table 1                                                        |
| (13) Details of the subjects from whom valuations were obtained are given                                                                      | N/A                                          |                                                                        |
| (14) Productivity changes (if included) are reported separately                                                                                | N/A                                          |                                                                        |
| (15) The relevance of productivity changes to the study question is discussed                                                                  | N/A                                          |                                                                        |
| (16) Quantities of resources are reported separately from their unit costs                                                                     | Methods; stated per person; Table 1, Table 2 | Page 5 and 6                                                           |
| (17) Methods for the estimation of quantities and unit costs are described                                                                     | Methods; Table 1, Table 2                    | Page 5 and 6; Adopted from literature                                  |

|                                                                                              |                           |              |
|----------------------------------------------------------------------------------------------|---------------------------|--------------|
| (18) Currency and price data are recorded                                                    | Methods; Table 1, Table 2 | Page 5 and 6 |
| (19) Details of currency of price adjustments for inflation or currency conversion are given | Methods                   | Page 5       |
| (20) Details of any model used are given                                                     | Methods                   | Page 3       |
| (21) The choice of model used and the key parameters on which it is based are justified      | Methods                   | Page 3       |
|                                                                                              |                           |              |
| <b>Analysis and interpretation of results</b>                                                |                           |              |
| (22) Time horizon of costs and benefits is stated                                            | Methods                   | Page 5       |
| (23) The discount rate(s) is stated                                                          | Methods                   | Page 5       |
| (24) The choice of rate(s) is justified                                                      | Methods                   | Page 5       |
| (25) An explanation is given if costs or benefits are not discounted                         | N/A                       |              |
| (26) Details of statistical tests and confidence intervals are given for stochastic data     | N/A                       |              |
| (27) The approach to sensitivity analysis is given                                           | Methods                   | Page 6       |
| (28) The choice of variables for sensitivity analysis is justified                           | Methods; Table 1, Table 2 | Page 6       |
| (29) The ranges over which the variables are varied are stated                               | Table 1, Table 2          | Page 6       |
| (30) Relevant alternatives are compared                                                      | Methods, Results          | Page 4 and 5 |
| (31) Incremental analysis is reported                                                        | N/A                       |              |
| (32) Major outcomes are presented in a disaggregated as well as aggregated form              | Table 3, 4 and 5          | Page 7 and 9 |
| (33) The answer to the study question is given                                               | Discussion, Conclusion    | Page 10      |
| (34) Conclusions follow from the data reported                                               | Conclusion                | Page 11      |
| (35) Conclusions are accompanied by the appropriate caveats                                  | Discussion, Conclusion    | Page 10      |

# BMJ Open

## Non-alcoholic fatty liver disease as a mediator of detriments of dietary sugar consumption: implications for the health and economic benefits of interventions in the United States

|                                 |                                                                                                                                                                                                                                                                                                                                                                                                                                                                                                                                                                                                                                                                                                                          |
|---------------------------------|--------------------------------------------------------------------------------------------------------------------------------------------------------------------------------------------------------------------------------------------------------------------------------------------------------------------------------------------------------------------------------------------------------------------------------------------------------------------------------------------------------------------------------------------------------------------------------------------------------------------------------------------------------------------------------------------------------------------------|
| Journal:                        | <i>BMJ Open</i>                                                                                                                                                                                                                                                                                                                                                                                                                                                                                                                                                                                                                                                                                                          |
| Manuscript ID                   | bmjopen-2016-013543.R2                                                                                                                                                                                                                                                                                                                                                                                                                                                                                                                                                                                                                                                                                                   |
| Article Type:                   | Research                                                                                                                                                                                                                                                                                                                                                                                                                                                                                                                                                                                                                                                                                                                 |
| Date Submitted by the Author:   | 30-May-2017                                                                                                                                                                                                                                                                                                                                                                                                                                                                                                                                                                                                                                                                                                              |
| Complete List of Authors:       | Vreman, Rick; University of California, San Francisco, Philip R. Lee Institute for Health Policy Studies<br>Goodell, Alex; University of California, San Francisco, Philip R. Lee Institute for Health Policy Studies<br>Rodriguez, Luis; University of California, Department of Epidemiology & Biostatistics<br>Porco, Travis; University of California, San Francisco, FI Proctor Foundation for Research in Ophthalmology<br>Lustig, Robert; University of California, San Francisco, Philip R. Lee Institute for Health Policy Studies; University of California San Francisco, Department of Pediatrics<br>Kahn, James; University of California, San Francisco, Philip R. Lee Institute for Health Policy Studies |
| <b>Primary Subject Heading</b>: | Public health                                                                                                                                                                                                                                                                                                                                                                                                                                                                                                                                                                                                                                                                                                            |
| Secondary Subject Heading:      | Nutrition and metabolism, Health policy, Health economics, Diabetes and endocrinology                                                                                                                                                                                                                                                                                                                                                                                                                                                                                                                                                                                                                                    |
| Keywords:                       | Added sugar, Non-alcoholic fatty liver disease, Type 2 diabetes, Microsimulation, Obesity, Fructose                                                                                                                                                                                                                                                                                                                                                                                                                                                                                                                                                                                                                      |
|                                 |                                                                                                                                                                                                                                                                                                                                                                                                                                                                                                                                                                                                                                                                                                                          |

SCHOLARONE™  
Manuscripts

# Non-alcoholic fatty liver disease as a mediator of detriments of dietary sugar consumption: implications for the health and economic benefits of interventions in the United States

Rick A Vreman<sup>1</sup>, Alex J Goodell<sup>1</sup>, Luis A Rodriguez<sup>2</sup>, Travis C Porco<sup>2,3</sup>, Robert H Lustig<sup>1,4</sup>, James G Kahn<sup>1</sup>

<sup>1</sup> Philip R. Lee Institute for Health Policy Studies, University of California San Francisco, California, United States of America;

<sup>2</sup> Department of Epidemiology & Biostatistics, University of California, San Francisco, California, United States of America;

<sup>3</sup> FI Proctor Foundation for Research in Ophthalmology, University of California, San Francisco, United States of America

<sup>4</sup> Department of Pediatrics, University of California San Francisco, California, United States of America

Contact information corresponding author:

Rick A Vreman

Nachtegaalstraat 20 BisA

3581 AH Utrecht

The Netherlands

T: +31-614661403

E: r.a.vreman@gmail.com

## Abstract

**Objectives:** Excessive consumption of added sugars in the human diet has been associated with obesity, type 2 diabetes (T2D), coronary heart disease (CHD), and other elements of the metabolic syndrome. Recent studies have shown that non-alcoholic fatty liver disease (NAFLD) is a critical pathway to metabolic syndrome. This model assesses the health and economic benefits of interventions aimed at reducing intake of added sugars.

**Methods:** Using data from U.S. National Health Surveys and current literature, we simulated an open cohort, for the period 2015 to 2035. We constructed a microsimulation model with Markov chains for NAFLD (including steatosis, non-alcoholic steatohepatitis (NASH), cirrhosis, and hepatocellular carcinoma (HCC)), body mass index (BMI), T2D, and CHD. We assessed reductions in population disease prevalence, disease-attributable disability-adjusted life years (DALYs), and costs, with interventions that reduce added sugars consumption by either 20% or 50%.

**Findings:** The model estimated that a 20% reduction in added sugars intake will reduce prevalence of hepatic steatosis, NASH, cirrhosis, HCC, obesity, T2D, and CHD. Incidence of T2D and CHD would be expected to decrease by 19.9 (95% CI: 12.8 – 27.0) and 9.4 (95% CI: 3.1 – 15.8) cases per 100,000 people after 20 years, respectively. A 20% reduction in consumption is also projected to annually avert 0.767 million (M) DALYs (95% CI: 0.757M – 0.777M), and a total of 10.3 billion (B) USD (95% CI: 10.2B – 10.4B) in discounted direct medical costs by 2035. These effects increased proportionally when added sugars intake were reduced by 50%.

**Conclusions:** The decrease in incidence and prevalence of disease is similar to results in other models, but averted costs and DALYs were higher, mainly due to inclusion of NAFLD and CHD. The model suggests that efforts to reduce consumption of added sugars may result in significant public health and economic benefits.

Strengths and limitations of this study

- No previous model has captured the full effects of added sugars through non-alcoholic fatty liver disease, obesity, type 2 diabetes and coronary heart disease.
- This model is applicable to each intervention that is aimed at reducing added sugars.
- The model is based on input parameters from multiple studies who were not always of excellent quality. We have used large intervals around these parameters to ensure reliable results.

## Introduction

The social and economic burdens of chronic metabolic disease have been increasing in the United States for the last three decades. Two-thirds of the adult population in the United States is now overweight, and morbid obesity affects 9.9% of all adult women.[1] Prevalence of Type 2 diabetes (T2D) in the U.S. is at 9.3%. [2,3] And the population affected by Coronary heart disease (CHD) increased concurrently from 13 to 15.5 million over the last ten years.[4,5] More than 15% of all deaths are attributable to CHD and more than 3% to diabetes.[6] Costs have simultaneously increased; and costs for CHD are expected to double over the next two decades.[7,8] Though these figures are stunning, they underestimate the magnitude of the problem. Non-alcoholic fatty liver disease (NAFLD) has recently been found to be present in over 45% of Latinos, 33% of Caucasians, and 24% of African-Americans, and is thought to play an important role in metabolic pathophysiology.[9–12] NAFLD is defined by the presence of liver fat in the absence of a primary insult such as alcohol, viral hepatitis, or heavy metal accumulation.[13] NAFLD is further categorized into: a) hepatic steatosis, which is a reversible fat accumulation in the liver defined by an occupation of steatotic hepatocytes of more than 5% of the liver parenchyma; and b) non-alcoholic steatohepatitis (NASH), which is defined as the presence of hepatic steatosis along with lobular and portal inflammation with hepatocyte injury (ballooning). Progressive collagen deposition and vascular remodelling in NASH may lead to cirrhosis, which in turn predisposes one to hepatocellular carcinoma (HCC).[9,13–15] NAFLD is the most common cause of liver disease in the Western world, and NASH is projected to become the leading cause of liver transplantation in the USA by the year 2020.[16,17] Currently 30–40% of NASH-cirrhotic patients succumb to a liver-related death within 10 years.[18,19] Hospitalizations for NAFLD have increased 97% between 2000 and 2012.[20] NAFLD has also been suggested as an important driver of T2D in lean individuals, as liver fat accumulation can cause insulin resistance.[10,21–23] NAFLD can occur as either a cause or consequence of the metabolic syndrome[10], and many now argue that NAFLD is the hepatic manifestation of metabolic syndrome, and should be included in its definition.[24–27] It is important to identify determinants of these metabolic diseases and assess the efficacy of upstream policy interventions to curb the national and the global epidemic of metabolic syndrome.

### *Added sugars*

Added sugars consumption increased in the U.S. over the years 1977–2000, decreased slightly between 2000–2008, and seems to have stabilized in the years thereafter.[28–30] Over 55% of all American adults consumed more than 50 grams of added sugars per day between 2005–2012, which is thought to be the cut-off value for added risk of metabolic derangement, and more than the advised maximum according to the American Heart Association (25 - 37.5 grams).[3,31] The U.S. Department of Agriculture recently established guidance for an upper limit of consumption of added sugars at 10% of total energy intake (amounting to 50 grams per day (200 kcal) for a prototype 2000 kcal/day diet).[32] The European Food and Safety authority does not state an explicit maximum for (added) sugars in their advice, but they do note that a number of authorities have established boundaries of <10% of total energy intake.[33] Furthermore, the American Heart Association recommends that U.S. adolescents restrict their intake of added sugars to less than 25 grams to avoid dyslipidaemia and CVD [34], yet current intake averages 94.0 grams per day in this age group.[35]

The excessive amount of added sugars (glucose + fructose) in the food supply has been associated with NAFLD and with each of the component diseases of the metabolic syndrome.[36–38] Fructose is metabolized by the liver, as it is the only organ with the required Glut5 transporter. Fructose bypasses glycogen, and is metabolized by the glycolytic pathway to acetyl-CoA. From there, excess acetyl-CoA is converted to citrate, diverted from the mitochondria into the cytoplasm via the citrate shuttle, and is then converted into fatty acids through the process of *de novo* lipogenesis(DNL).[39] From there, hepatically-derived excess triglyceride is either packaged with apo-B100 into very-low-density-lipoprotein (VLDL), which is released into the bloodstream and can foment cardiovascular disease; or will precipitate as a lipid droplet, resulting in hepatic steatosis which drives insulin resistance, causing weight gain, and predisposing to T2D. While most early studies of added sugar and chronic disease were correlative and confounded by excess caloric administration, lack of adjustment for total calories, or adiposity, more recent studies demonstrate that the effect is specific for dietary fructose, and independent of calories consumed and BMI.[39–48] For instance, added sugar is directly correlated with risk for metabolic syndrome in adolescents in NHANES even after controlling for total calories and BMI z-score.[35] Added sugar has been associated with elevated uric acid levels and hypertension.[49,50] Two recent studies, both controlled for calories and adiposity and employing a time analysis, support sugar-sweetened beverages as a specific causative agent in the pathogenesis of T2D.[42,51,52] A decade-long global econometric analysis demonstrates that only changes in sugar availability are predictive of changes in diabetes prevalence, unrelated to poverty, urbanization, aging, physical activity, total calories, or obesity.[37] Lastly, in a starch-for-sugar exchange study, our group has documented improvements in metabolic and lipid parameters unrelated to both calories and changes in weight, demonstrating improved metabolic health within 10 days.[40,53] We have demonstrated that the decline in DNL and resultant reduction in liver fat was the primary driver in the metabolic and cardiovascular improvement.[54] By demonstrating that removal of dietary fructose (the macronutrient most closely associated with DNL) commensurately improves liver fat and insulin dynamics irrespective of calories or weight, we are able to infer a causative mechanism of metabolic dysfunction by linking DNL to both liver fat and insulin resistance. We also demonstrated that despite an increase in the glucose (starch) content of the diet, beta-cell insulin secretion reduced, thus protecting against beta-cell exhaustion, thought to be important in the pathogenesis of type 2 diabetes[55]; and reducing total body insulin burden, thought to contribute to both obesity and risk for cardiovascular disease.[56,57] Thus, reduction in DNL and liver fat through reduction in consumption of added sugars appears to be a

1  
2  
3 primary goal of both therapy and prevention of chronic metabolic disease, and forms the rationale for our microsimulation  
4 model.

#### 5 *Intervention efficacy*

6 Several studies have modeled the effects of different interventions to reduce added sugars intake. One popular  
7 intervention is the implementation of a sugar-sweetened beverage (SSB) tax. Though this does not affect all added sugars in  
8 the food supply, SSB's are the main single contributor to overall added sugars intake, and a tax on SSB's is easier to  
9 implement than an added sugars tax.[58] A 20% SSB tax is projected to reduce prevalence of obesity anywhere from 1.5 —  
10 10%, based on different studies.[59–61] Data from Mexico demonstrate that effects on reduction of consumption are  
11 durable, although evidence of mitigation of disease are not yet available.[62] Annual diabetes cases would be expected to  
12 decline concurrently between 1.8% and 3.4%, and CHD cases by 0.5 —1.0%.[60,63] Additional research has focused on  
13 other strategies to lower added sugars consumption. Banning SSB's from the U.S. Supplemental Nutrition Assistance  
14 Program (SNAP) is expected to result in a 0.89% lower obesity prevalence within 10 years, while lowering the amount of  
15 sugars in the food supply through a cap and trade approach by 1% annually is expected to lower the prevalence of obesity  
16 by 1.7% after 20 years.[64,65]

17 An important limitation of all these studies is that none of these models incorporate the effects and costs related to sugar-  
18 induced NAFLD. Because NAFLD explains a part of the incidence of diabetes in lean individuals and is expected to contribute  
19 significantly to overall healthcare burden and costs, it is necessary that models incorporate all of these diseases.

20 Our goal is to predict the magnitude of the health and economic effects of interventions that are designed to reduce added  
21 sugars consumption either by 20% or 50%, respectively. This modelling approach more precisely quantifies the benefits of  
22 reducing added sugar consumption. We describe the process of creating, calibrating and validating a microsimulation  
23 model. We clarify the relevant interactions that determine progression within this model in Markov chains for NAFLD  
24 (including cirrhosis and HCC), obesity, T2D, and CHD, and we describe the creation of a simulated open cohort  
25 representative of the US population. We allow the model to run for 20 years into the future to predict effectiveness. We  
26 report the outcomes of these simulations in future incidence, prevalence and mortality of disease, and in disability-adjusted  
27 life years (DALYs) and costs averted.

#### 28 **Methods**

29 The Methods section is constructed according to the recommendations by the ISPOR taskforce for good modelling practice,  
30 and completeness is checked according to the CHEERS statement.[66,67]

#### 31 *Summary*

32 We constructed an individual based model consisting of a base cohort of 22,400 people. New people entered the model  
33 each year at age 20, the youngest age group we simulate. Individuals are assigned a state at initialization in each 'chain' of  
34 the model. These include age, sex, ethnicity, sugar consumption, NAFLD, BMI, T2D, and CHD. The current health state of  
35 each individual at the beginning of a cycle forms a risk profile, and the presence in a risk-inducing state in one of the chains  
36 can influence the probability of transitioning between states in a different chain, according to literature-based odds ratios.  
37 We simulated 20 annual cycles for each individual, counting events, incurred direct medical costs, and DALYs for each cycle,  
38 as well as the overall prevalence for the total cohort. We discounted the costs and DALYs by 3.0% annually, and costs were  
39 presented in 2015 USD. Two interventions were simulated: one that reduced each individual's added sugars consumption  
40 by 20%, and one that reduced it by 50%. We used identical random numbers for the base case scenario and each of the  
41 interventions, to reduce variance. We calibrated the model to other studies reporting historic trends and predicting future  
42 prevalence, and validated the model via face validation, cross-validation, and sensitivity analyses. Deterministic sensitivity  
43 analysis was used to determine the influence of individual input parameters. Probabilistic sensitivity analysis was used to  
44 generate mean results and 95% central coverage intervals.

#### 45 *Model type*

46 An individual-based stochastic Markov model (microsimulation) was used. The model contained a chain for each of four  
47 separate diseases. Because each of these diseases has a minimum of 3 states, and the transitions between these states are  
48 based on the presence or absence of a set of risk factors, the state-space explosion phenomenon prohibits us from using  
49 traditional Markov cohort simulation. An individual-based approach makes it possible to use individual-specific transition  
50 rates, capturing the effect of interventions on individual risk factor profiles, thereby avoiding the need to count the number  
51 of individuals in all possible states and allowing for complex relationships between several risk factors within a single  
52 individual.[68] It also opens up potential for future analyses among subgroups.

#### 53 *Population and setting*

54 The model is based on the adult population (age 20+) of the United States. Outcomes are reported from a healthcare  
55 perspective. This includes direct medical costs and DALYs averted. Indirect medical or non-medical costs are excluded.  
56 Because this model is meant to assess the benefits of reducing added sugars intake, unrelated to the type of intervention,  
57 costs of implementing any specific intervention and possible revenues (e.g. in the case of an excise or general services tax)  
58 are also excluded.  
59  
60

### Model structure and input parameters

A simplified model transition diagram is presented in **Figure 1**. Model input parameters are presented in **table 1 and 2** and supplementary **table 1**. Individuals will reside in a state within each chain at any given point in time. The probability of staying within a state or moving to another state in each cycle is determined by a set of defined transition probabilities, which are influenced by the risk profile (the current state in the other chains) of the individual. Events in different chains can occur in parallel.

The simulation is initialized by assignment of age (A), sex (S), and ethnicity (E) to each individual. Age states are based on the population distribution that is provided by the Bureau of the Census, and are specified for each age from 20 to 84 and a cumulative age group for anyone above 85. We simulate an open cohort. New individuals with age 20 enter each year.[69] The initial age distribution is specified in supplementary **table 2**. Male and female sex are incorporated with an initial distribution specified in supplementary **table 3**. Ethnicities incorporated into the model are Hispanic, non-Hispanic black, and non-Hispanic-white. Data availability did not allow us to incorporate Asians and Native Americans as separate groups and therefore they were grouped with the non-Hispanic whites. The initial ethnicity distribution is specified in supplementary **table 4**.

When the individual is assigned an age, sex and ethnicity, these determine the state that this individual will be assigned to in each of the chains for NAFLD, BMI, T2D, and CHD at the start of the simulation. Each chain represents a separate disease process, and has its own non-disease state (e.g., non-T2D). This does not mean that this person is actually healthy (e.g. a person can have cirrhosis but not diabetes). The NAFLD chain includes a non-NAFLD state, and states for hepatic steatosis, NASH, cirrhosis, and NASH- or cirrhosis-related HCC. A person is defined as having NAFLD when his or her current state is steatosis, NASH, or cirrhosis. This is different from common terminology, where cirrhosis is excluded. We chose this definition for easy reference, because these three states imply extra risk for progression within other chains. The initial distribution over NAFLD states is specified in supplementary **table 5** and specified per ethnicity group.

It is important to note that modeled cirrhosis and HCC are specifically related to steatosis and NASH, and do not include all cirrhosis and HCC cases within the population, irrespective of cause. Transition directly from the non-NAFLD state to either one is therefore not possible. Baseline transition probabilities are specified in **table 2** and transition rates from NASH and cirrhosis to HCC are specified per age group, as defined in supplementary **table 6 and 7**, starting at age 40. (age groups: 40-44, 50-54, 55-59, 60-64, 65-69, 70-74, 75-79 and 80 years and over). Risk factors for progression are stated in **table 2** and include ethnicity (protective and detrimental factors), being overweight or obese, and high sugar consumption. These risk factors apply for transitions up to the cirrhosis state.

The BMI chain includes states for healthy weight, overweight and obesity. The initial distribution over BMI states is specified in supplementary **table 8**, and specified by sex, ethnicity, and age group (ages 20-35, 35-44, 45-54, 55-64, 65-74, 75-84 and 85+). Baseline transition probabilities are specified in **table 2**. Risk factors for progression are stated in **table 1** and include NAFLD disease states and high sugar consumption.

The T2D chain includes a non-T2D state and a T2D state. The initial distribution over T2D states is specified in supplementary **table 9** and specified by sex, ethnicity, and age group (ages 20-35, 35-44, 45-54, 55-64, 65-74 75-84 and 85+). Average baseline transition probability to T2D is specified in **table 2** and age-specific incidence rates are provided in supplementary **table 10** (age groups: 20-24, 25-29, 30-34, 35-39, 40-44, 45-49, 50-54, 55-59, 60-64, 65-69, 70-74, 75-79 and 80+). Risk factors for progression to T2D are stated in **table 2** and include NAFLD disease states, overweight, and obesity.

The CHD chain includes a non-CHD state and a CHD state. The distribution over CHD states at simulation start is specified in supplementary **table 11** and specified per sex, ethnicity and age group (ages 20-44, 45-64 and 65+). Average baseline transition probability to CHD is specified in **table 2** and age-specific incidence rates are provided in supplementary **table 12** (age groups: <35, 35-39, 40-44, 45-49, 50-54, 55-59, 60-64, 65-69, 70-74, 75-79, 80-84 and 85+). Risk factors for progression to CHD are stated in **table 2** and include NAFLD disease states, overweight, obesity, and T2D.

Each individual is assigned a level of consumption of added sugars. There are two states in the sugar chain — high consumption ( $\geq 50$ g of added sugars per day), and low consumption ( $< 50$ g of added sugars per day). The distribution of these states among the study population reflects the data of the NHANES 2005-2012, and is specified per sex and ethnicity group, as shown by supplementary **table 13**. [3,35] Dietary intake data in NHANES were collected using two 24-hr dietary recalls, following the United States Department of Agriculture's (USDA) Automated Multiple Pass Method and administered to the adult.[70] The arithmetic mean of added sugar intake in grams per day was obtained by merging individual dietary recalls from NHANES with the USDA Food Patterns Equivalents Database (FPED).[71] Sugar consumption is fixed throughout the simulation for each person.

From each state, individuals can transition to a 'non-disease related death' state. Three disease chains also have a disease-specific death state (i.e., T2D-death, CHD-death, and liver-related death), allowing calculation of disease-attributable death. Mortality rates from causes outside the model were corrected for the competing risks of modeled causes of mortality to

1  
2  
3 ensure valid overall mortality. Death in one chain forces an instant transition to the death state in other chains. Average  
4 transition probabilities to disease-related death states are specified in **table 2**. Age specific rates for T2D-related death are  
5 specified in supplementary **table 14**. Liver death rates are specified in **table 2**. Deaths were attributed to the disease for  
6 which the transition to death was established first. To remove confounding because of calculation order, chain calculation  
7 order was randomized. This ensures that deaths are attributed to the right disease, e.g. people with T2D and CHD have a  
8 chance to die of T2D, CHD or succumb to a non-disease related death.

9 To determine whether there were temporal trends in incidence or death rates, we plotted the available historic data (1999-  
10 2013) and projected this to the future.[5,6,72] These trends were found to be present for the incidence and mortality rate  
11 of CHD, and for the non-disease specific mortality rate. We incorporated these regression rates into the model by adjusting  
12 the respective baseline transition probabilities before each cycle. Average baseline transition probabilities for CHD and non-  
13 disease related deaths are specified in **table 2**. The CHD-specific death rates by year and age are specified in supplementary  
14 **table 15** and the non-disease related death rates per year and age are specified in supplementary **table 16**. For DALY  
15 calculations, health-adjusted life expectancy for females and males are provided in **supplementary table 17 and 18**.

16 Final transition probabilities per chain are compared to a pseudo-random number to determine state-transitions each cycle.  
17 These final transition probabilities were derived from baseline transition probabilities, adjusting for the relative risk of  
18 progression observed for applicable risk factors. The correction formula for the baseline transition probabilities is a  
19 multiplicative function of all applicable values (odds ratios) for present risk factors. As an example, imagine a person with  
20 high sugar consumption, obesity, and hepatic steatosis, but no T2D or CHD (disregarding age, sex & ethnicity in this  
21 example). In the NAFLD chain the transition from steatosis to NASH has a baseline transition probability of 0.0060 (see table  
22 2). This is adjusted to reflect the ORs for applicable risk factors (3.14 for obesity and 2.00 for high sugar consumption),  
23 resulting in a revised transition probability of  $0.0060 * 3.14 * 2.00 = 0.0377$ . Similar adjustments are made for transitions to  
24 cirrhosis, HCC, death, and non-NAFLD. What remains is the probability of remaining in the steatosis state.

#### 25 **Figure 1**

##### 26 *Interventions*

27 Two interventions were simulated: a reduction of 20%, and a reduction of 50% in individual added sugars consumption. A  
28 20% reduction in added sugars was simulated to be consistent with the percentage reduction assessed in several  
29 studies.[59–61] In addition, a 50% reduction was simulated because the American Heart Association advises 6-9 teaspoons  
30 of added sugar (for females and males respectively) as a maximum per day, which is approximately 50% of the current  
31 average consumption.[3,31,35] The individual added sugars consumption distribution was then split into a dichotomous  
32 variable; with people consuming less than or equal to 50 grams of added sugars being considered low consumers, and  
33 people consuming more than 50 grams per day being considered high consumers. This model did not incorporate  
34 substitutions to other food categories, but it did incorporate the overall added sugars reduction, rather than a sole  
35 reduction in SSB consumption used in other studies.[60,63] This makes it possible to capture the overall effects of added  
36 sugars, contrary to the solitary effect of SSB's. The effects of changes in food consumption to other food groups (e.g.  
37 proteins, fat) are not modeled. Detrimental effects of these food categories are less well documented and inferior to the  
38 effects of added sugars. NHANES data was used to reduce individual added sugars consumption by the specified amount.  
39 From these data, new distributions were calculated to reflect subgroup consumption patterns. These distributions  
40 determined the ratio between individuals in the high and the low risk group, and therefore determine progression within  
41 disease chains. Identical random numbers were used between interventions to reduce variance, as described by Stout and  
42 Goldie.[73]

##### 43 *Time horizon, cycle length*

44 The model had a time horizon of 20 years, modeling the calendar years 2015 to 2035. This duration was chosen to make  
45 sure effects within chronic diseases (T2D, CHD) were sufficiently visible. The cycle length was 1 year. Individuals could exit  
46 the model through each death state, or live until the end of the simulation.

##### 47 *Outcomes*

48 Outcomes were incidence, prevalence and mortality of disease, and direct medical costs and DALYs averted. Costs were  
49 calculated by multiplying prevalence by discounted disease-attributable costs. DALYs were calculated by adding years lived  
50 with disability (YLD) and years of life lost (YLL). YLD was calculated as the product of the prevalence of disease times the  
51 discounted disability weight. YLL was calculated by multiplying the discounted health-adjusted life expectancy at death by  
52 the amount of people that died in that specific year, given a certain age and sex. The discount rate for costs, disability  
53 weights, and life expectancy was 3.0% annually. Health-adjusted life expectancy and discounted life expectancy for males  
54 and females for the United States were not derived by the model but implemented directly from publications of the  
55 Institute for Health Metrics and Evaluation (IHME). They are provided in the online supplement, **table 3 and 4**.

##### 56 *Input parameter determination*

The model parameters that determined demographics and the distribution of risk factors and disease at the start of the simulation are mainly derived from NHIS and NHANES data. If data were not sufficient, current literature was consulted. Model input parameters, their distribution ranges, and the sources from which they were acquired are presented in **tables 1 and 2**. Baseline transition probabilities were derived from literature data, and where necessary, via calibration. Also when necessary, we used logistic conversion to adjust transition rates to reflect annual probabilities. Interaction values were derived from literature data. For interactions between chains, we used conservative data when possible, to ensure no overestimation of effect size. We took special care to ensure these odds ratios reflect the case for our model, i.e. reflect decreased risk due to a reduction in overall added sugars intake, not just a reduction in sugar-sweetened beverage intake, which is more commonly investigated. Regression rates were determined by historic and projected trends reported by the CDC and the American Heart Association.[3,5,6] Costs were derived from American population-based studies and, where necessary, were inflated by the inflation calculator of the United States Department of Labor Statistics to 2015 USD.[74] Costs were calculated as specific disease-attributable costs (i.e. costs for CHD due to diabetes were counted as costs due to CHD rather than costs due to diabetes). This was necessary to prevent overlapping costs. Disability weights were adopted from World Health Organizations' burden of disease estimates and current literature. Specific sources are provided in the tables.

**Table 1.** Model input values and ranges for disease characteristics. Costs are population based, meaning that they include those who do not get care.

| Disease state | Prevalence at simulation start |         |         |           | Costs (annual) |        |            | Disability weights |       |       |         |
|---------------|--------------------------------|---------|---------|-----------|----------------|--------|------------|--------------------|-------|-------|---------|
|               | Mean                           | Min     | Max     | Ref.      | Mean           | SD     | Ref.       | Mean               | Min   | Max   | Ref.    |
| Steatosis     | 27.955%#                       | 18.637% | 41.933% | [8,16,18] | 134            | 50     | [75]       | 0.000              | 0.000 | 0.000 | [76–78] |
| NASH          | 3.141%#                        | 2.094%  | 4.712%  | [8,16,18] | 267            | 100    | [75]       | 0.033              | 0.017 | 0.066 | [76–78] |
| Cirrhosis     | 0.314%#                        | 0.209%  | 0.471%  | [79,80]   | 2,861          | 1073   | [81]       | 0.194              | 0.127 | 0.273 | [10,75] |
| HCC           | 0.025%#                        | 0.017%  | 0.038%  | [82,83]   | 42,644         | 15,992 | [76,84,85] | 0.294              | 0.199 | 0.411 | [76–78] |
| CHD           | 6.544%#                        | -       | -       | [1,2,6]   | 13,233         | 4962   | [6,86]     | 0.066              | 0.043 | 0.095 | [76]    |
| T2D           | 9.447%#                        | -       | -       | [1,2]     | 8,170          | 3064   | [86–88]    | 0.150              | 0.080 | 0.220 | [76,89] |
| Overweight    | 33.473%#                       | -       | -       | [1,2]     | 343            | 129    | [86,88]    | 0.000              | 0.000 | 0.000 | [90]    |
| Obesity       | 37.391%#                       | -       | -       | [1,2]     | 916            | 344    | [86,88]    | 0.012              | 0.001 | 0.022 | [90]    |

SD: standard deviation, NASH: non-alcoholic steatohepatitis, HCC: hepatocellular carcinoma, CHD: coronary heart disease, T2D: type 2 diabetes. CHD, T2D, overweight, and obesity prevalence are not varied in the sensitivity analyses.  
# Age, sex and/or ethnicity specific values are specified in the online supplement.

**Table 2.** Selected model input parameter values and ranges.

| Parameter                                  | Mean               | Min        | Max        | Source        |
|--------------------------------------------|--------------------|------------|------------|---------------|
| <b>Initialization</b>                      |                    |            |            |               |
| Age distribution                           | OS1*               | -          | -          | [91]          |
| Sex distribution                           | OS2**              | -          | -          | [91]          |
| Ethnicity distribution                     | OS3***             | -          | -          | [91]          |
| High sugar consumption                     | 57.278%#           | 38.186%    | 85.917%    | [3,35,42]     |
| <b>Baseline transition probabilities##</b> | <b>Mean chance</b> | <b>Min</b> | <b>Max</b> | <b>Source</b> |
| Non-NAFLD -> steatosis                     | 0.0100             | 0.006700   | 0.01500    | [92–100]      |
| Non-NAFLD -> NASH                          | 0.0003             | 0.000201   | 0.00045    | [92–100]      |
| Steatosis -> NASH                          | 0.0060             | 0.004020   | 0.00900    | [92–100]      |
| Steatosis -> cirrhosis                     | 0.0002             | 0.000134   | 0.00030    | [92–100]      |
| NASH -> cirrhosis                          | 0.0020             | 0.001340   | 0.00300    | [92–100]      |
| NASH -> HCC                                | 0.0001#            | 0.000067   | 0.00015    | [92–103]      |
| NASH -> liver death                        | 0.0038             | 0.002546   | 0.00570    | [104–107]     |
| Cirrhosis -> HCC                           | 0.0200#            | 0.013400   | 0.03000    | [92–103]      |
| Cirrhosis -> liver death                   | 0.0340             | 0.022780   | 0.05100    | [104–107]     |
| HCC -> liver death                         | 0.5000             | 0.335000   | 0.75000    | [104–107]     |
| Non-CHD -> CHD                             | 0.0045#            | 0.003015   | 0.00675    | [108,109]     |
| CHD -> CHD death                           | 0.0100#            | 0.006700   | 0.01500    | [5,6,108]     |
| Non-T2D -> T2D                             | 0.0045#            | 0.003015   | 0.00675    | [72,110]      |
| T2D -> T2D death                           | 0.0100#            | 0.006700   | 0.01500    | [6,72,110]    |

| Healthy weight -> overweight                                | 0.0500              | 0.033500 | 0.07500 | [111–114]    |
|-------------------------------------------------------------|---------------------|----------|---------|--------------|
| Healthy weight -> obese                                     | 0.0060              | 0.004020 | 0.00900 | [111–114]    |
| Overweight -> obese                                         | 0.0180              | 0.012060 | 0.02700 | [111–114]    |
| Each alive state -> non-disease related death               | 0.0100 <sup>#</sup> | 0.006700 | 0.01500 | [6]          |
| Risk factors (odds ratios)                                  | Mean value          | Min      | Max     | Source       |
| NHB ethnicity for progression within NAFLD                  | 0.93                | 0.70     | 1.00    | [115]        |
| Hispanic ethnicity for progression within NAFLD             | 1.67                | 1.22     | 2.22    | [115]        |
| Overweight for progression within NAFLD                     | 2.19                | 1.60     | 3.38    | [93,116–121] |
| Obesity for progression within NAFLD                        | 3.14                | 2.07     | 5.28    | [93,116–121] |
| High sugar consumption for progression within NAFLD         | 2.00                | 1.50     | 3.00    | [38,122]     |
| NAFLD for TP non-CHD -> CHD                                 | 2.31                | 1.66     | 3.62    | [123–127]    |
| Overweight for TP non-CHD -> CHD                            | 1.22                | 1.12     | 1.32    | [128–135]    |
| Obesity for TP non-CHD -> CHD                               | 1.60                | 1.43     | 1.79    | [128–135]    |
| T2D for TP non-CHD -> CHD                                   | 2.24                | 1.64     | 3.06    | [136]        |
| NAFLD for TP non-T2D -> T2D                                 | 2.73                | 1.87     | 4.46    | [137–143]    |
| Overweight for TP non-T2D -> T2D                            | 2.18                | 1.59     | 3.36    | [144–150]    |
| Obesity for TP non-T2D -> T2D                               | 3.36                | 2.18     | 5.72    | [144–150]    |
| NAFLD for progression within the BMI chain                  | 2.19                | 1.60     | 3.38    | [93,116–121] |
| High sugar consumption for progression within the BMI chain | 2.60                | 1.20     | 6.00    | [149,150]    |

SD: standard deviation, NAFLD: non-alcoholic fatty liver disease (steatosis, NASH & cirrhosis), NASH: non-alcoholic steatohepatitis, HCC: hepatocellular carcinoma, CHD: coronary heart disease, T2D: type 2 diabetes, NHB: non-Hispanic black.

\* See online supplement table 1. \*\* See online supplement table 2. \*\*\* See online supplement table 3.

# Age, sex and/or ethnicity specific values are specified in the online supplement.

## Transition probabilities for regression to less severe disease are specified in the online supplement.

#### Calibration

Incidence, prevalence, mortality and costs of overweight and obesity, T2D, and CHD were calibrated to reflect historic data from the CDC and projections from the American Heart Association (AHA) and several individual studies predicting future disease.[6,7,151–155] NASH- and cirrhosis-related HCC incidence and mortality was calibrated to historic trends reported by the CDC, and future predictions reported by the American Cancer Association.[6,156]

#### Validation

Validation of the model occurred via face validation, cross-validation, and sensitivity analyses. Face validation was performed manually by the authors. Each chain was checked separately for functionality before merging them. Cross-validation was performed by comparing epidemiological outcomes and predictions from our model with reported results from different studies on each subject, as presented in the Discussion.

Uncertainty was assessed using deterministic and probabilistic sensitivity analysis (DSA & PSA). DSA was conducted using a five-point analysis, with the minima and maxima specified in **tables 1 and 2**. If a mean and standard deviation (SD) are specified, we used a range of mean  $\pm$  1.96\*SD. DSA results are only presented for the two main outcomes: total costs and DALYs averted in the year 2035. PSA was conducted using the distributions defined in **tables 1 and 2**, to produce a mean and 95% central coverage interval for all outcome values by running the simulation 10,000 times (each of which including the base case and two interventions).

#### Cohort simulation

To produce stable results, limit computational requirements, and have a cohort that remained representative of the U.S. population, we simulated a base cohort of 22,400 people, with new entry of 416 people each year, reflecting CDC population prospects.[69] Because of computational requirements, the model was built in Golang programming language (Google Inc, Mountain View, CA). Model code is publicly available via <https://github.com/alexgoodell/go-mdism> or can be acquired through the corresponding author. Sensitivity analyses were conducted using a 20-machine cluster (Amazon Web Services, Seattle, WA). Outcome analysis was completed in Excel 2010 (Microsoft, Redmond, WA).

## Results

### Incidence and mortality

The incidence of T2D, CHD, and HCC and the corresponding death rates in the year 2035 are stated in **table 3**. Diabetes incidence is expected to rise over the next 20 years, resulting in an incidence rate of 1035 cases per 100,000 people. The interventions are expected to reduce this by 19.9 and 83.5 respectively. CHD incidence is expected to rise to 665 cases per 100,000 people by 2035. This can be reduced by 9.4 and 39 cases by the 20% and the 50% intervention respectively. NASH- or cirrhosis-related HCC incidence will rise to 4.4 cases per 100,000 people. Interventions could reduce this amount by 0.3 and 1.3 respectively. Liver death can be due to HCC, or it can be related to NASH or cirrhosis in the absence of HCC. Liver-

related deaths will rise substantially, to 19.8 deaths per 100,000 people by 2035. This can be reduced by 1.4 or 5.8 deaths per 100,000 people by the 20% and 50% intervention, respectively.

**Table 3.** Annual occurring and averted events in 2035

| Per 100,000 people |                        |                        |                  |                     |                  |
|--------------------|------------------------|------------------------|------------------|---------------------|------------------|
| Events             | No intervention (CI)   | 20% red. (CI)          | Difference (CI)  | 50% red. (CI)       | Difference (CI)  |
| T2D cases          | 1034.6 (1031.0-1038.2) | 1014.7 (1011.3-1018.2) | 19.9 (12.8-27.0) | 951.2 (947.9-954.4) | 83.5 (76.7-90.3) |
| T2D deaths         | 576.6 (574.2-578.9)    | 569.3 (567.0-571.6)    | 7.2 (2.7-11.8)   | 546.4 (544.2-548.6) | 30.2 (25.7-34.6) |
| CHD cases          | 665.1 (661.9-668.2)    | 655.6 (652.5-658.8)    | 9.4 (3.1-15.8)   | 626.1 (623.1-629.1) | 39.0 (32.8-45.2) |
| CHD deaths         | 203.6 (202.2-205.0)    | 201.9 (200.5-203.3)    | 1.6 (-1.2-4.4)   | 197.2 (195.9-198.6) | 6.3 (3.6-9.1)    |
| HCC cases          | 4.4 (4.32-4.41)        | 4.0 (3.95-4.05)        | 0.3 (0.24-0.39)  | 3.1 (3.02-3.18)     | 1.3 (1.24-1.38)  |
| Liver deaths       | 19.8 (19.65-20.02)     | 18.5 (18.29-18.63)     | 1.4 (1.02-1.73)  | 14.1 (13.94-14.21)  | 5.8 (5.44-6.08)  |

NASH: non-alcoholic steatohepatitis; HCC: hepatocellular carcinoma; CHD: coronary heart disease; T2D: type 2 diabetes mellitus; CI: 95% central coverage interval. Numbers might not add up due to rounding.

#### Prevalence

**Figure 2**, graphs A-H show the reduction in prevalence of disease due to the two intervention strategies. A 20% reduction in added sugars consumption is expected to decrease prevalence of each disease state significantly after 20 years, except for overweight prevalence, which does not change significantly. A 50% reduction in added sugars consumption will proportionally affect prevalence. Effects on T2D and CHD prevalences start to accumulate after an initial 3-year lag period. Graph G shows that overweight prevalence is not reduced. This is because the individuals that regressed from obese to overweight offset the reduction achieved in people that started overweight and regressed to normal weight. This effect is clarified by the drop in obesity prevalence.

#### Figure 2

#### Costs & DALYs

An overview of economic findings is presented in **table 4**. Overall costs for the modeled disease states could be reduced by 2.26% (95% CI 2.23% — 2.29%) by the year 2035 with an intervention that reduces added sugars intake by 20%. The 50% intervention will reduce overall costs by 6.99% (95% CI: 6.91 — 7.08). DALY burden and averted DALYs are presented in **table 5**. Total amount of DALYs could be reduced by 4.32% (95% CI: 4.27% — 4.38%) or 13.37% (95% CI: 13.24% — 13.51%) respectively. The majority of averted DALYs are due to reduced mortality.

**Table 4.** Annual costs spent and averted per disease state in 2035

| In billions 2015 USD, discounted by 3.0% annually |                            |                            |                         |                            |                         |
|---------------------------------------------------|----------------------------|----------------------------|-------------------------|----------------------------|-------------------------|
| State                                             | No intervention (CI)       | 20% reduction (CI)         | Difference (CI)         | 50% reduction (CI)         | Difference (CI)         |
| Steatosis                                         | 6.48 (6.43-6.53)           | 6.40 (6.35-6.45)           | 0.08 (0.080-0.082)      | 6.23 (6.18-6.28)           | 0.25 (0.248-0.255)      |
| NASH                                              | 5.26 (5.22-5.30)           | 4.89 (4.85-4.93)           | 0.37 (0.368-0.375)      | 4.11 (4.08-4.14)           | 1.15 (1.139-1.162)      |
| Cirrhosis                                         | 7.00 (6.93-7.07)           | 6.22 (6.16-6.28)           | 0.78 (0.772-0.791)      | 4.60 (4.56-4.65)           | 2.40 (2.371-2.429)      |
| HCC                                               | 5.10 (5.04-5.16)           | 4.55 (4.50-4.60)           | 0.55 (0.537-0.558)      | 3.40 (3.36-3.44)           | 1.70 (1.669-1.721)      |
| CHD                                               | 162.2 (160.9-163.6)        | 160.1 (158.8-161.5)        | 2.09 (2.06-2.12)        | 155.7 (154.4-157.0)        | 6.51 (6.43-6.58)        |
| T2D                                               | 200.0 (198.4-201.6)        | 195.9 (194.3-197.5)        | 4.07 (4.02-4.12)        | 187.4 (185.9-188.9)        | 12.59 (12.46-12.73)     |
| Overweight                                        | 16.4 (16.3-16.5)           | 16.6 (16.5-16.8)           | -0.25 (-0.26 - -0.25)   | 17.2 (17.1-17.3)           | -0.79 (-0.81 - -0.78)   |
| Obesity                                           | 52.7 (52.3-53.1)           | 50.1 (49.7-50.5)           | 2.59 (2.57-2.62)        | 44.7 (44.3-45.0)           | 8.03 (7.95-8.12)        |
| <b>Total</b>                                      | <b>455.1 (451.4-458.9)</b> | <b>444.9 (441.2-448.5)</b> | <b>10.3 (10.2-10.4)</b> | <b>423.3 (419.8-426.8)</b> | <b>31.8 (31.5-32.2)</b> |

NASH: non-alcoholic steatohepatitis; HCC: hepatocellular carcinoma; CHD: coronary heart disease; T2D: type 2 diabetes mellitus; CI: 95% central coverage interval. Numbers might not add up due to rounding.

**Table 5.** Annual occurring and averted DALYs in 2035

| In millions |                      |                    |                     |                    |                     |
|-------------|----------------------|--------------------|---------------------|--------------------|---------------------|
| State       | No intervention (CI) | 20% reduction (CI) | Difference (CI)     | 50% reduction (CI) | Difference (CI)     |
| NASH        | 2.97 (2.955-2.988)   | 2.76 (2.746-2.777) | 0.210 (0.209-0.212) | 2.32 (2.309-2.334) | 0.650 (0.645-0.655) |
| Cirrhosis   | 0.48 (0.475-0.482)   | 0.42 (0.422-0.428) | 0.053 (0.053-0.054) | 0.31 (0.312-0.316) | 0.164 (0.162-0.165) |
| HCC         | 3.06 (3.046-3.084)   | 2.78 (2.765-2.799) | 0.283 (0.279-0.283) | 2.19 (2.180-2.206) | 0.872 (0.863-0.881) |
| CHD         | 2.32 (2.305-2.330)   | 2.29 (2.276-2.302) | 0.028 (0.028-0.029) | 2.23 (2.217-2.242) | 0.088 (0.086-0.090) |
| T2D         | 8.21 (8.180-8.248)   | 8.06 (8.023-8.089) | 0.158 (0.155-0.160) | 7.72 (7.690-7.752) | 0.492 (0.487-0.498) |

|                |                            |                            |                            |                            |                            |
|----------------|----------------------------|----------------------------|----------------------------|----------------------------|----------------------------|
| Obesity        | 0.69 (0.689-0.700)         | 0.66 (0.655-0.666)         | 0.034 (0.034-0.035)        | 0.59 (0.584-0.593)         | 0.106 (0.105-0.107)        |
| <b>Total</b>   | <b>17.74 (17.65-17.83)</b> | <b>16.97 (16.89-17.06)</b> | <b>0.767 (0.757-0.777)</b> | <b>15.37 (15.29-15.44)</b> | <b>2.372 (2.348-2.396)</b> |
| From mortality | 11.94                      | 11.50                      | 0.439                      | 10.58                      | 1.357                      |
| From morbidity | 5.80                       | 5.47                       | 0.328                      | 4.78                       | 1.015                      |

NASH: non-alcoholic steatohepatitis; HCC: hepatocellular carcinoma; CHD: coronary heart disease; T2D: type 2 diabetes mellitus; CI: 95% central coverage interval. Numbers might not add up due to rounding.

#### Sensitivity analyses

We show tornado diagrams for the two most important outcomes: annual costs and DALYs averted by the year 2035 due to an intervention that reduces sugar consumption by 20%. The diagrams show the impact that specific input parameters had on selected results. The ten variables that caused the widest range in results are shown. When varying individual variables, the annual savings by the year 2035 range from 7.9 to 17.1 billion 2015 USD. The tornado diagram (**Figure 3**) shows that the interaction between high added sugars consumption and the progression within the NAFLD and BMI chains had the greatest impact on total costs averted. In the tornado diagram for total annual DALYs averted by the 20% intervention in the year 2035 (**Figure 4**), assigned disability weights had the greatest impact. Total DALYs averted ranged between 0.36 and 1.41 million.

#### Figure 3&4

### Discussion

It has been estimated that the cost burden of the diseases of metabolic syndrome are 75% of the total annual health care budget (\$3.2 trillion) of the United States. The clinical burden of NAFLD alone is estimated at \$103 billion.[157] The proposed model shows clear and significant benefits for interventions that reduce consumption of added sugars. A reduction by 20% will reduce annual direct medical costs for U.S. adults by more than 10 billion USD (2015 dollars) by the year 2035. A 50% reduction will save an additional 21 billion. Together with these economic benefits, population health will significantly improve. A total of 770,000 DALYs could be averted with a 20% reduction in consumption. A 50% reduction in consumption will avert another 1.6 million DALYs. These health and economic benefits are the direct result of lower incidence, prevalence, and mortality of disease in U.S. adults due to lower consumption of added sugars. Averted costs are achieved primarily through reduced costs for CHD, T2D, overweight, and obesity. This is mainly because costs for the most prevalent NAFLD states, namely steatosis and NASH, are fairly low, whereas costs for other illnesses are much higher (Table 1). In averted DALYs, we find that the combination of disability weight and prevalence changes are predictors of DALY reductions. E.g. NASH has a lower disability weight but higher prevalence reductions and therefore we find almost equal DALY reductions compared to HCC or CHD. T2D has the highest reduction in DALY burden because it has relatively large values for both prevalence reduction and disability weight.

#### Fit with current knowledge

The estimate for health and economic benefit of this model is similar to a number of previously performed economic evaluations. Basu et al. found a reduction in diabetes incidence of 21.7 cases per 100,000 people with a reduction of 20% of added sugars through a cap and trade approach, limiting the amount of sugars in the food supply.[65] We found a reduction of 19.9 cases per 100,000 people, indicating a similar absolute effect size. CHD incidence reduction is estimated to be about 1.5-fold higher than found in a similar study, but we argue that this is mainly because the other study simulated a 20% tax on sugar-sweetened beverages, and therefore the overall added sugars consumption reduction was smaller than the 20% reduction we simulated.[63] In an econometric analysis looking backward in time, Basu et al. found a delay of 3 years between changes in sugar consumption and prevalence of diabetes.[37] Similarly, we found a delay of 3 years going forward in time between reduction of consumption and reduction in prevalence of disease. Prevalence of obesity has been reported to drop by 1.5% – 10% due to a reduction of added sugars by 10% – 20%.[59–61] Our result of 2.1% reduction in obesity prevalence seems to reflect our conservative approach in determining input parameter values.

Costs savings are bigger in our model compared to other models.[60,64,64] This was for three reasons. First, some other models do not use added sugars as a whole but use SSB's, resulting in a smaller effect. Second, our overall prevalence of T2D and CHD is higher than most other models. We have calibrated our model to historic trends reported by the CDC and to future projections of the AHA, ADA and separate studies predicting future prevalence, and therefore argue that our estimate is valid. Third, and perhaps most importantly, no other studies predict future NAFLD prevalence. We present the first model that estimates the effects of sugar interventions on NAFLD prevalence and associated costs and DALYs.

In 2009, the American Heart Association recommended a reduction in added sugar consumption from a median of 90 grams per day to a maximum of 25 grams for women and 37.5 grams for men.[31] In 2016, the USDA and WHO settled on an upper limit of 10% of calories, which approximates 50 grams per day. Given the U.S. current median consumption of 80 grams per day, our microsimulation modeling cutoffs of 20% and 50%, while ambitious, are metabolically rational and in

concert with governmental goals.[158]

Our model only allows us to examine the negative side of the balance sheet in terms of cost savings to health care. However, reductions in added sugar consumption have been modeled to provide significant increases to the positive side of the balance sheet in terms of economic productivity. Indeed, a simulation modeling by Morgan Stanley predicted economic growth to decline to zero by the year 2035 using a high-sugar case, whereas stabilization at +2.9% was noted with a low-sugar case.[159]

#### *Strengths and limitations*

This study is the first of its kind to model the effect of added sugars on NAFLD as well as on BMI, and therefore it captures a more complete picture of the possible health and economic benefits of interventions that reduce intake of added sugars. Though taxing sugar-sweetened products, mainly beverages, has been widely suggested as a public health strategy, other approaches, e.g. a cap and trade approach, have also been suggested.[58–61,63–65] We have constructed this model to be applicable with each of these interventions, so that it does not rely on any consumption statistics other than added sugars as a whole. A limitation to this approach is that our model does not incorporate a possible change to non-sugared caloric products, containing protein, fat, or other carbohydrates. While it is conceivable that removal of added sugars in the diet could result in subsequent substitution of other foodstuffs to restore an individual's caloric baseline, *ad lib* population studies do not support that such caloric compensation takes place.[160] It is important that effort is put into investigating self- and cross-elasticity of sugar-sweetened products to determine the effect of these caloric replacements. Though this is a limitation, research has clearly shown that the contribution of added sugars in relation to their excessive intake is likely the most important consumption factor for metabolic derangement. Furthermore, added sugars consumption was fixed throughout the simulation for each individual (though specified per sex and ethnic group). We could not find sufficient data on changes in sugar consumption related to incident disease and therefore could not model these changes accurately enough. We argue that keeping the sugar consumption fixed is likely more accurate than modeling changing sugar consumption based solely on age. The main limitation of this model is the uncertainty of input parameters. The pathophysiology of NAFLD and its associations with other metabolic diseases is still widely under investigation. We have modeled cirrhosis as an irreversible condition, which is not necessarily true in all cases. Furthermore, the input parameters for baseline transition probabilities and interaction (OR) values are still somewhat uncertain. Many studies report associations, but very few studies report plausible quantitative causal relationships. There are several reasons that explain this low number of studies. First, it is hard to accurately determine the individual components in an individual's diet. Second, there is no inexpensive, accurate way to determine the presence of individual NAFLD states. Commonly used ultrasonography possibly underestimates the prevalence of NAFLD and does not differentiate between steatosis and NASH, while up to 79% of patients may have serum alanine aminotransferase (ALT) levels within the normal reference range of < 40 U/mL.[9,161] Additionally, the studies that we included to define our input parameters are generally not a perfect reflection of the population that we modeled, which may lead to imperfect estimates of values. We have addressed these uncertainties in inputs by taking wide ranges in the probabilistic sensitivity analysis, which determines the SD and 95% central coverage interval around the results. Results remain statistically significant, indicating that any minor inaccuracies in input parameter values will not render the effects insignificant. Ultimately, it is desirable to determine incidence of NAFLD states and risk factor relative risks in independent prospective cohort studies, and to assess intervention effectiveness via randomized controlled trials. This model can be refined and updated when new data become available.

It is possible that our results might still underestimate the total effects. We only modeled diagnosed disease, we took a conservative approach when determining input parameter values, and we did not take societal costs into account. Real health, healthcare, and economic benefits are likely larger than estimated. Furthermore, we only modeled the population with an age over 20. Likely, including health effects in children, particularly those with type 2 diabetes, would yield additional benefits.

#### *Implications*

This model clarifies the significant health and economic benefits that could be achieved by a public health intervention that reduces consumption of added sugars in U.S. adults. We recommend that health policy makers review options to implement sugar reduction. Important to consider are the barriers to limiting added sugars in the United States. The food industry uses sugar to enhance flavor and as a bulking and browning agent, humectant, and spoilage retardant. Another obstacle is the lowered price for manufacturing, due to government subsidies for corn, cane, and beets. Historically there was another barrier -- lack of consensus on the link between sugar and metabolic disease. However, consensus on causality is now strong.[162] Recently sugar taxation has emerged as a viable strategy, levied in the U.K. and Mexico, as well as several municipalities in the U.S., including San Francisco, Oakland, Berkeley, and Albany, CA, as well as Chicago, IL and Philadelphia, PA.

#### *Future research*

Future research should focus on establishing a more precise measurement of NAFLD prevalence, incidence, and risk factors. Furthermore, magnitude and effects of switching to different food groups should be assessed. Finally, changes in added sugars consumption related to ageing and incident disease should be more intensively investigated.

### Contributor statement

RAV was involved in conceptualizing the study, reviewing literature, conducting the modelling analysis, analyzing the data and writing the manuscript. AJG was involved in conducting the modelling analysis and in editing the paper. LAR and RHL were involved in conceptualizing the model, providing and structuring data inputs and editing the manuscript. TCP was involved in reviewing and revising the manuscript, checking statistical and mathematical assumptions and establishing overall validity of the model. JGK was involved in conceptualization of the model, input data review, guiding the modelling process and providing a critical review of the manuscript. All authors read and approved the final manuscript.

### Competing interests

The authors declare no direct conflicts of interest. However, Dr. Lustig has received author fees from Hudson Street Press regarding his authorship of: "Fat Chance: Beating the Odds Against Sugar, Processed Food, Obesity, and Disease"; "The Fat Chance Cookbook"; and "Sugar has 56 names: A Shopper's Guide". He is also the unpaid chief science officer of the non-profit EatREAL.

### Financial support

No financial support was provided for this study.

### Data sharing statement

An online supplement will be made available containing comprehensive tables of used input data. The modelling code is available through github: <https://github.com/alexgoodell/go-mdism> or can be accessed via the corresponding author.

### Figure legends

#### Figure 1. Model state and covariate structure.

Each individual gets assigned a state in each chain at the start of the simulation and their specific covariates (age, sex, ethnicity, high/low sugar consumption). Circles represent disease states. Solid lines indicate a possible transition pathway between states. Coloured lines indicate how being in a state within one chain can affect the value of the transition probability between two states in another chain. These are split into three categories: pink striped lines indicate the effect of NAFLD on progression in the BMI, T2D and CHD chains. Blue dotted lines indicate the effect of overweight and obesity on progression in the NAFLD, T2D and CHD chains. The green dotted line indicates the effect of T2D on progression in the CHD chain. 3 chains contain disease related deaths and the model contains a non-disease related death state for other causes of mortality. The states of individuals are updated every cycle (i.e. annually) for 20 years. Each cycle the state distributions and their related costs and DALYs are generated as output.

NAFLD: non-alcoholic fatty liver disease, T2D: type 2 diabetes, CHD: coronary heart disease, NASH: non-alcoholic steatohepatitis, HCC: hepatocellular carcinoma, DALYs: disability-adjusted life years.

#### Figure 2, graphs A to H.

Reduction in population prevalence of disease due to interventions. Lines represent mean values +/- one standard deviation. 0% is the baseline, representing no intervention. The blue lines with diamonds indicate a reduction of added sugar of 20%. The red lines with crosses represent a reduction of 50%. NASH; non-alcoholic steatohepatitis.

#### Figure 3. Tornado diagram of the ten most critical variables on total costs averted in the year 2035.

#### Figure 4. Tornado diagram of the ten most critical variables on total DALYs averted in the year 2035.

### References

- 1 Flegal KM, Kruszon-Moran D, Carroll MD, *et al.* Trends in Obesity Among Adults in the United States, 2005 to 2014. *JAMA* 2016;**315**:2284–91. doi:10.1001/jama.2016.6458
- 2 Centers for Disease Control and Prevention. National Center for Health Statistics. Health Data Interactive. Accessed at [www.cdc.gov/nchs/hdi.htm](http://www.cdc.gov/nchs/hdi.htm) on Apr 23, 2015.
- 3 Centers for Disease Control and Prevention. National Center for Health Statistics. National Health and Nutrition Examination Survey Data. Hyattsville, MD: U.S. Department of Health and Human Services, Centers for Disease Control and Prevention. 2005–2012. <http://www.cdc.gov/nchs/nhanes.htm>.
- 4 *American Heart Association. Heart Disease and Stroke Statistics — 2005 Update. Dallas, Texas.: American Heart Association; 2005.*

- 1  
2  
3 5 Mozaffarian D, Benjamin EJ, Go AS, *et al.* Heart disease and stroke statistics--2015 update: a  
4 report from the American Heart Association. *Circulation* 2015;**131**:e29-322.  
5 doi:10.1161/CIR.000000000000152  
6
- 7 6 Centers for Disease Control and Prevention. National Center for Health Statistics. Underlying  
8 Cause of Death 1999-2013 on CDC WONDER Online Database, released 2015. Data are from the  
9 Multiple Cause of Death Files, 1999-2013, as compiled from data provided by the 57 vital  
10 statistics jurisdictions through the Vital Statistics Cooperative Program. Accessed at  
11 <http://wonder.cdc.gov/ucd-icd10.html> on Apr 16, 2015.  
12
- 13 7 Heidenreich PA, Trogdon JG, Khavjou OA, *et al.* Forecasting the future of cardiovascular disease  
14 in the United States: a policy statement from the American Heart Association. *Circulation*  
15 2011;**123**:933-44. doi:10.1161/CIR.0b013e31820a55f5  
16
- 17 8 American Diabetes Association. Economic costs of diabetes in the U.S. In 2007. *Diabetes Care*  
18 2008;**31**:596-615. doi:10.2337/dc08-9017  
19
- 20 9 Browning JD, Szczepaniak LS, Dobbins R, *et al.* Prevalence of hepatic steatosis in an urban  
21 population in the United States: impact of ethnicity. *Hepatology* 2004;**40**:1387-95.  
22 doi:10.1002/hep.20466  
23
- 24 10 Yki-Järvinen H. Non-alcoholic fatty liver disease as a cause and a consequence of metabolic  
25 syndrome. *Lancet Diabetes Endocrinol* 2014;**2**:901-10. doi:10.1016/S2213-8587(14)70032-4  
26
- 27 11 Lonardo A, Ballestri S, Marchesini G, *et al.* Nonalcoholic fatty liver disease: a precursor of the  
28 metabolic syndrome. *Dig Liver Dis Off J Ital Soc Gastroenterol Ital Assoc Study Liver*  
29 2015;**47**:181-90. doi:10.1016/j.dld.2014.09.020  
30
- 31 12 Ballestri S, Nascimbeni F, Romagnoli D, *et al.* The independent predictors of non-alcoholic  
32 steatohepatitis and its individual histological features.: Insulin resistance, serum uric acid,  
33 metabolic syndrome, alanine aminotransferase and serum total cholesterol are a clue to  
34 pathogenesis and candidate targets for treatment. *Hepatology Res Off J Jpn Soc Hepatol*  
35 2016;**46**:1074-87. doi:10.1111/hepr.12656  
36
- 37 13 Chalasani N, Younossi Z, Lavine JE, *et al.* The diagnosis and management of non-alcoholic fatty  
38 liver disease: practice guideline by the American Gastroenterological Association, American  
39 Association for the Study of Liver Diseases, and American College of Gastroenterology.  
40 *Gastroenterology* 2012;**142**:1592-609. doi:10.1053/j.gastro.2012.04.001  
41
- 42 14 Tiniakos DG. Nonalcoholic fatty liver disease/nonalcoholic steatohepatitis: histological  
43 diagnostic criteria and scoring systems. *Eur J Gastroenterol Hepatol* 2010;**22**:643-50.  
44 doi:10.1097/MEG.0b013e32832ca0cb  
45
- 46 15 Farazi PA, DePinho RA. Hepatocellular carcinoma pathogenesis: from genes to environment.  
47 *Nat Rev Cancer* 2006;**6**:674-87. doi:10.1038/nrc1934  
48
- 49 16 Wree A, Broderick L, Canbay A, *et al.* From NAFLD to NASH to cirrhosis-new insights into  
50 disease mechanisms. *Nat Rev Gastroenterol Hepatol* 2013;**10**:627-36.  
51 doi:10.1038/nrgastro.2013.149  
52
- 53 17 Mahady SE, George J. Management of nonalcoholic steatohepatitis: an evidence-based  
54 approach. *Clin Liver Dis* 2012;**16**:631-45. doi:10.1016/j.cld.2012.05.003  
55
- 56  
57  
58  
59  
60

- 1  
2  
3 18 Review Team, LaBrecque DR, Abbas Z, *et al.* World Gastroenterology Organisation global  
4 guidelines: Nonalcoholic fatty liver disease and nonalcoholic steatohepatitis. *J Clin*  
5 *Gastroenterol* 2014;**48**:467–73. doi:10.1097/MCG.0000000000000116  
6  
7 19 Williams CD, Stengel J, Asike MI, *et al.* Prevalence of nonalcoholic fatty liver disease and  
8 nonalcoholic steatohepatitis among a largely middle-aged population utilizing ultrasound and  
9 liver biopsy: a prospective study. *Gastroenterology* 2011;**140**:124–31.  
10 doi:10.1053/j.gastro.2010.09.038  
11  
12 20 Peery AF, Dellon ES, Lund J, *et al.* Burden of gastrointestinal disease in the United States: 2012  
13 update. *Gastroenterology* 2012;**143**:1179–1187.e1-3. doi:10.1053/j.gastro.2012.08.002  
14  
15 21 Gastaldelli A, Cusi K, Pettiti M, *et al.* Relationship between hepatic/visceral fat and hepatic  
16 insulin resistance in nondiabetic and type 2 diabetic subjects. *Gastroenterology* 2007;**133**:496–  
17 506. doi:10.1053/j.gastro.2007.04.068  
18  
19 22 Dietrich P, Hellerbrand C. Non-alcoholic fatty liver disease, obesity and the metabolic  
20 syndrome. *Best Pract Res Clin Gastroenterol* 2014;**28**:637–53. doi:10.1016/j.bpg.2014.07.008  
21  
22 23 Fukuda T, Hamaguchi M, Kojima T, *et al.* The impact of non-alcoholic fatty liver disease on  
23 incident type 2 diabetes mellitus in non-overweight individuals. *Liver Int Off J Int Assoc Study*  
24 *Liver* 2016;**36**:275–83. doi:10.1111/liv.12912  
25  
26 24 Sattar N, McConnachie A, Ford I, *et al.* Serial metabolic measurements and conversion to type 2  
27 diabetes in the west of Scotland coronary prevention study: specific elevations in alanine  
28 aminotransferase and triglycerides suggest hepatic fat accumulation as a potential contributing  
29 factor. *Diabetes* 2007;**56**:984–91. doi:10.2337/db06-1256  
30  
31 25 Thomas EL, Brynes AE, Hamilton G, *et al.* Effect of nutritional counselling on hepatic, muscle  
32 and adipose tissue fat content and distribution in non-alcoholic fatty liver disease. *World J*  
33 *Gastroenterol* 2006;**12**:5813–9.  
34  
35 26 Vanni E, Bugianesi E, Kotronen A, *et al.* From the metabolic syndrome to NAFLD or vice versa?  
36 *Dig Liver Dis Off J Ital Soc Gastroenterol Ital Assoc Study Liver* 2010;**42**:320–30.  
37 doi:10.1016/j.dld.2010.01.016  
38  
39 27 Larson-Meyer DE, Heilbronn LK, Redman LM, *et al.* Effect of calorie restriction with or without  
40 exercise on insulin sensitivity, beta-cell function, fat cell size, and ectopic lipid in overweight  
41 subjects. *Diabetes Care* 2006;**29**:1337–44. doi:10.2337/dc05-2565  
42  
43 28 Marriott BP, Cole N, Lee E. National estimates of dietary fructose intake increased from 1977 to  
44 2004 in the United States. *J Nutr* 2009;**139**:1228S–1235S. doi:10.3945/jn.108.098277  
45  
46 29 Wang DD, Leung CW, Li Y, *et al.* Trends in dietary quality among adults in the United States,  
47 1999 through 2010. *JAMA Intern Med* 2014;**174**:1587–95.  
48 doi:10.1001/jamainternmed.2014.3422  
49  
50 30 Welsh JA, Sharma AJ, Grellinger L, *et al.* Consumption of added sugars is decreasing in the  
51 United States. *Am J Clin Nutr* 2011;**94**:726–34. doi:10.3945/ajcn.111.018366  
52  
53 31 Johnson RK, Appel LJ, Brands M, *et al.* Dietary sugars intake and cardiovascular health: a  
54 scientific statement from the American Heart Association. *Circulation* 2009;**120**:1011–20.  
55 doi:10.1161/CIRCULATIONAHA.109.192627  
56  
57  
58  
59  
60

- 1  
2  
3 32 U.S. Dept. of Agriculture. HHS and USDA release new dietary guidelines to encourage healthy  
4 eating patterns to prevent chronic diseases. USDA Press, Report 202-720-4623.  
5 <https://www.fns.usda.gov/pressrelease/2016/000516>.  
6
- 7 33 EFSA Panel on Dietetic Products N and Allergies (NDA). Scientific Opinion on Dietary Reference  
8 Values for carbohydrates and dietary fibre. *EFSA J* 2010;**8**:1462. doi:10.2903/j.efsa.2010.1462  
9
- 10 34 Vos MB, Kaar JL, Welsh JA, *et al*. Added Sugars and Cardiovascular Disease Risk in Children: A  
11 Scientific Statement From the American Heart Association. *Circulation* 2017;**135**:e1017–34.  
12 doi:10.1161/CIR.0000000000000439  
13
- 14 35 Rodríguez LA, Madsen KA, Cotterman C, *et al*. Added sugar intake and metabolic syndrome in  
15 US adolescents: cross-sectional analysis of the National Health and Nutrition Examination  
16 Survey 2005–2012. *Public Health Nutr* 2016;**19**:2424–34. doi:10.1017/S1368980016000057  
17
- 18 36 Yang Q, Zhang Z, Gregg EW, *et al*. Added sugar intake and cardiovascular diseases mortality  
19 among US adults. *JAMA Intern Med* 2014;**174**:516–24. doi:10.1001/jamainternmed.2013.13563  
20
- 21 37 Basu S, Yoffe P, Hills N, *et al*. The relationship of sugar to population-level diabetes prevalence:  
22 an econometric analysis of repeated cross-sectional data. *PLoS One* 2013;**8**:e57873.  
23 doi:10.1371/journal.pone.0057873  
24
- 25 38 Abid A, Taha O, Nseir W, *et al*. Soft drink consumption is associated with fatty liver disease  
26 independent of metabolic syndrome. *J Hepatol* 2009;**51**:918–24.  
27 doi:10.1016/j.jhep.2009.05.033  
28
- 29 39 Lustig RH. Fructose: it's "alcohol without the buzz." *Adv Nutr Bethesda Md* 2013;**4**:226–35.  
30 doi:10.3945/an.112.002998  
31
- 32 40 Lustig RH, Mulligan K, Noworolski SM, *et al*. Isocaloric fructose restriction and metabolic  
33 improvement in children with obesity and metabolic syndrome. *Obes Silver Spring Md*  
34 2016;**24**:453–60. doi:10.1002/oby.21371  
35
- 36 41 Schwarz J-M, Noworolski SM, Wen MJ, *et al*. Effect of a High-Fructose Weight-Maintaining Diet  
37 on Lipogenesis and Liver Fat. *J Clin Endocrinol Metab* 2015;**100**:2434–42. doi:10.1210/jc.2014-  
38 3678  
39
- 40 42 Imamura F, O'Connor L, Ye Z, *et al*. Consumption of sugar sweetened beverages, artificially  
41 sweetened beverages, and fruit juice and incidence of type 2 diabetes: systematic review,  
42 meta-analysis, and estimation of population attributable fraction. *BMJ* 2015;**351**:h3576.  
43
- 44 43 Bray GA, Popkin BM. Dietary sugar and body weight: have we reached a crisis in the epidemic  
45 of obesity and diabetes?: health be damned! Pour on the sugar. *Diabetes Care* 2014;**37**:950–6.  
46 doi:10.2337/dc13-2085  
47
- 48 44 Lim JS, Mietus-Snyder M, Valente A, *et al*. The role of fructose in the pathogenesis of NAFLD  
49 and the metabolic syndrome. *Nat Rev Gastroenterol Hepatol* 2010;**7**:251–64.  
50 doi:10.1038/nrgastro.2010.41  
51
- 52 45 Maersk M, Belza A, Stødkilde-Jørgensen H, *et al*. Sucrose-sweetened beverages increase fat  
53 storage in the liver, muscle, and visceral fat depot: a 6-mo randomized intervention study. *Am J*  
54 *Clin Nutr* 2012;**95**:283–9. doi:10.3945/ajcn.111.022533  
55  
56  
57  
58  
59  
60

- 1  
2  
3 46 Stanhope KL, Schwarz JM, Keim NL, *et al.* Consuming fructose-sweetened, not glucose-  
4 sweetened, beverages increases visceral adiposity and lipids and decreases insulin sensitivity in  
5 overweight/obese humans. *J Clin Invest* 2009;**119**:1322–34. doi:10.1172/JCI37385  
6
- 7 47 Pollock NK, Bundy V, Kanto W, *et al.* Greater fructose consumption is associated with  
8 cardiometabolic risk markers and visceral adiposity in adolescents. *J Nutr* 2012;**142**:251–7.  
9 doi:10.3945/jn.111.150219  
10
- 11 48 Sevastianova K, Santos A, Kotronen A, *et al.* Effect of short-term carbohydrate overfeeding and  
12 long-term weight loss on liver fat in overweight humans. *Am J Clin Nutr* 2012;**96**:727–34.  
13 doi:10.3945/ajcn.112.038695  
14
- 15 49 Nguyen S, Choi HK, Lustig RH, *et al.* Sugar-sweetened beverages, serum uric acid, and blood  
16 pressure in adolescents. *J Pediatr* 2009;**154**:807–13. doi:10.1016/j.jpeds.2009.01.015  
17
- 18 50 Chen L, Caballero B, Mitchell DC, *et al.* Reducing consumption of sugar-sweetened beverages is  
19 associated with reduced blood pressure: a prospective study among United States adults.  
20 *Circulation* 2010;**121**:2398–406. doi:10.1161/CIRCULATIONAHA.109.911164  
21
- 22 51 InterAct Consortium, Romaguera D, Norat T, *et al.* Consumption of sweet beverages and type 2  
23 diabetes incidence in European adults: results from EPIC-InterAct. *Diabetologia* 2013;**56**:1520–  
24 30. doi:10.1007/s00125-013-2899-8  
25
- 26 52 Ballestri S, Zona S, Targher G, *et al.* Nonalcoholic fatty liver disease is associated with an almost  
27 twofold increased risk of incident type 2 diabetes and metabolic syndrome. Evidence from a  
28 systematic review and meta-analysis. *J Gastroenterol Hepatol* 2016;**31**:936–44.  
29 doi:10.1111/jgh.13264  
30
- 31 53 Gugliucci A, Lustig RH, Caccavello R, *et al.* Short-term isocaloric fructose restriction lowers  
32 apoC-III levels and yields less atherogenic lipoprotein profiles in children with obesity and  
33 metabolic syndrome. *Atherosclerosis* 2016;**253**:171–7.  
34 doi:10.1016/j.atherosclerosis.2016.06.048  
35
- 36 54 Schwarz JM, Noworolski SM, Gugliucci A, Jones G, Erkin-Cakmak A, Tai VW, Wen M, Palii SP,  
37 Sinclair E, Korn N, Velasco-Alin M, Lustig RH, Mulligan K: Fructose restriction, liver fat, de novo  
38 lipogenesis, and insulin kinetics in children with obesity. *Gastroenterology* (in press).  
39
- 40 55 Perry RJ, Samuel VT, Petersen KF, *et al.* The role of hepatic lipids in hepatic insulin resistance  
41 and type 2 diabetes. *Nature* 2014;**510**:84–91. doi:10.1038/nature13478  
42
- 43 56 Templeman NM, Skovsø S, Page MM, *et al.* A causal role for hyperinsulinemia in obesity. *J*  
44 *Endocrinol* 2017;**232**:R173–83. doi:10.1530/JOE-16-0449  
45
- 46 57 Jia G, DeMarco VG, Sowers JR. Insulin resistance and hyperinsulinaemia in diabetic  
47 cardiomyopathy. *Nat Rev Endocrinol* 2016;**12**:144–53. doi:10.1038/nrendo.2015.216  
48
- 49 58 Brownell KD, Farley T, Willett WC, *et al.* The public health and economic benefits of taxing  
50 sugar-sweetened beverages. *N Engl J Med* 2009;**361**:1599–605. doi:10.1056/NEJMp0905723  
51
- 52 59 Mytton OT, Eyles H, Ogilvie D. Evaluating the Health Impacts of Food and Beverage Taxes. *Curr*  
53 *Obes Rep* 2014;**3**:432–9. doi:10.1007/s13679-014-0123-x  
54  
55  
56  
57  
58  
59  
60

- 1  
2  
3 60 Wang YC, Coxson P, Shen Y-M, *et al*. A penny-per-ounce tax on sugar-sweetened beverages would cut health and cost burdens of diabetes. *Health Aff Proj Hope* 2012;**31**:199–207. doi:10.1377/hlthaff.2011.0410
- 4  
5  
6  
7 61 Smith TA, Lin B, Lee J. Taxing Caloric Sweetened Beverages: Potential Effects on Beverage Consumption, Calorie Intake, and Obesity, ERR-100, U.S. Department of Agriculture, Economic Research Service, July 2010.
- 8  
9  
10  
11 62 Cochero MA, Rivera-Dommarco J, Popkin BM, *et al*. In Mexico, Evidence Of Sustained Consumer Response Two Years After Implementing A Sugar-Sweetened Beverage Tax. *Health Aff Proj Hope* 2017;**36**:564–71. doi:10.1377/hlthaff.2016.1231
- 12  
13  
14  
15 63 Mekonnen TA, Odden MC, Coxson PG, *et al*. Health benefits of reducing sugar-sweetened beverage intake in high risk populations of California: results from the cardiovascular disease (CVD) policy model. *PloS One* 2013;**8**:e81723. doi:10.1371/journal.pone.0081723
- 16  
17  
18  
19 64 Basu S, Seligman HK, Gardner C, *et al*. Ending SNAP subsidies for sugar-sweetened beverages could reduce obesity and type 2 diabetes. *Health Aff Proj Hope* 2014;**33**:1032–9. doi:10.1377/hlthaff.2013.1246
- 20  
21  
22  
23 65 Basu S, Lewis K. Reducing added sugars in the food supply through a cap-and-trade approach. *Am J Public Health* 2014;**104**:2432–8. doi:10.2105/AJPH.2014.302170
- 24  
25  
26  
27 66 Caro JJ, Briggs AH, Siebert U, *et al*. Modeling good research practices--overview: a report of the ISPOR-SMDM Modeling Good Research Practices Task Force--1. *Value Health J Int Soc Pharmacoeconomics Outcomes Res* 2012;**15**:796–803. doi:10.1016/j.jval.2012.06.012
- 28  
29  
30  
31 67 Husereau D, Drummond M, Petrou S, *et al*. Consolidated Health Economic Evaluation Reporting Standards (CHEERS)—Explanation and Elaboration: A Report of the ISPOR Health Economic Evaluation Publication Guidelines Good Reporting Practices Task Force. *Value Health* 2013;**16**:231–50. doi:10.1016/j.jval.2013.02.002
- 32  
33  
34  
35 68 Stewart WJ. *Introduction to the Numerical Solution of Markov Chains. 1st ed. Princeton: Princeton University Press; 1994.*
- 36  
37  
38  
39 69 U.S. Census Bureau, Population Division. Table 9: Projections of the Population by Sex and Age for the United States: 2015 to 2060 (NP2014-T9). 2014. Accessed on <http://www.census.gov/population/projections/> at Apr 23, 2015.
- 40  
41  
42  
43 70 National Center for Health Statistics (U.S.), ed. National Health and Nutrition Examination Survey: Analytic Guidelines, 1999–2010. Hyattsville, Maryland: U.S. Department of Health and Human Services, Centers for Disease Control and Prevention, National Center for Health Statistics; 2013.
- 44  
45  
46  
47 71 United States Department of Agriculture. Food Patterns Equivalents Database. USDA Agricultural Research Service. <http://www.ars.usda.gov/Services/docs.htm?docid=23869>. Published December 2014. Accessed January 29, 2015.
- 48  
49  
50  
51 72 Geiss LS, Wang J, Cheng YJ, *et al*. Prevalence and incidence trends for diagnosed diabetes among adults aged 20 to 79 years, United States, 1980–2012. *JAMA* 2014;**312**:1218–26. doi:10.1001/jama.2014.11494
- 52  
53  
54  
55  
56  
57  
58  
59  
60

- 1  
2  
3 73 Stout NK, Goldie SJ. Keeping the noise down: common random numbers for disease simulation  
4 modeling. *Health Care Manag Sci* 2008;**11**:399–406.  
5  
6 74 United States Department of Labor. CPI Inflation Calculator. Available:  
7 [http://www.bls.gov/data/inflation\\_calculator.htm](http://www.bls.gov/data/inflation_calculator.htm).  
8  
9 75 Zhang E, Wartelle-Bladou C, Lepanto L, *et al*. Cost-utility analysis of nonalcoholic steatohepatitis  
10 screening. *Eur Radiol* 2015;**25**:3282–94. doi:10.1007/s00330-015-3731-2  
11  
12 76 Murray CJL, Vos T, Lozano R, *et al*. Disability-adjusted life years (DALYs) for 291 diseases and  
13 injuries in 21 regions, 1990-2010: a systematic analysis for the Global Burden of Disease Study  
14 2010. *Lancet Lond Engl* 2012;**380**:2197–223. doi:10.1016/S0140-6736(12)61689-4  
15  
16 77 Michelotti GA, Machado MV, Diehl AM. NAFLD, NASH and liver cancer. *Nat Rev Gastroenterol*  
17 *Hepatol* 2013;**10**:656–65. doi:10.1038/nrgastro.2013.183  
18  
19 78 Page JM, Harrison SA. NASH and HCC. *Clin Liver Dis* 2009;**13**:631–47.  
20 doi:10.1016/j.cld.2009.07.007  
21  
22 79 Foster T, Anania FA, Li D, *et al*. The prevalence and clinical correlates of nonalcoholic fatty liver  
23 disease (NAFLD) in African Americans: the multiethnic study of atherosclerosis (MESA). *Dig Dis*  
24 *Sci* 2013;**58**:2392–8. doi:10.1007/s10620-013-2652-7  
25  
26 80 Farrell GC, Larter CZ. Nonalcoholic fatty liver disease: from steatosis to cirrhosis. *Hepatol Baltim*  
27 *Md* 2006;**43**:S99–112. doi:10.1002/hep.20973  
28  
29 81 Baumeister SE, Völzke H, Marschall P, *et al*. Impact of fatty liver disease on health care  
30 utilization and costs in a general population: a 5-year observation. *Gastroenterology*  
31 2008;**134**:85–94. doi:10.1053/j.gastro.2007.10.024  
32  
33 82 Adams LA, Lymp JF, St Sauver J, *et al*. The natural history of nonalcoholic fatty liver disease: a  
34 population-based cohort study. *Gastroenterology* 2005;**129**:113–21.  
35  
36 83 Ascha MS, Hanouneh IA, Lopez R, *et al*. The incidence and risk factors of hepatocellular  
37 carcinoma in patients with nonalcoholic steatohepatitis. *Hepatol Baltim Md* 2010;**51**:1972–8.  
38 doi:10.1002/hep.23527  
39  
40 84 Bambha K, Belt P, Abraham M, *et al*. Ethnicity and nonalcoholic fatty liver disease. *Hepatol*  
41 *Baltim Md* 2012;**55**:769–80. doi:10.1002/hep.24726  
42  
43 85 McAdam-Marx C, McGarry LJ, Hane CA, *et al*. All-cause and incremental per patient per year  
44 cost associated with chronic hepatitis C virus and associated liver complications in the United  
45 States: a managed care perspective. *J Manag Care Pharm JMCP* 2011;**17**:531–46.  
46 doi:10.18553/jmcp.2011.17.7.531  
47  
48 86 Lightwood J, Bibbins-Domingo K, Coxson P, *et al*. Forecasting the future economic burden of  
49 current adolescent overweight: an estimate of the coronary heart disease policy model. *Am J*  
50 *Public Health* 2009;**99**:2230–7. doi:10.2105/AJPH.2008.152595  
51  
52 87 American Diabetes Association. Economic costs of diabetes in the U.S. in 2012. *Diabetes Care*  
53 2013;**36**:1033–46. doi:10.2337/dc12-2625  
54  
55  
56  
57  
58  
59  
60

- 1  
2  
3 88 Li Q, Blume SW, Huang JC, *et al.* The Economic Burden of Obesity by Glycemic Stage in the  
4 United States. *PharmacoEconomics* 2015;**33**:735–48. doi:10.1007/s40273-014-0248-5  
5  
6 89 Darbà J, Kaskens L, Detournay B, *et al.* Disability-adjusted life years lost due to diabetes in  
7 France, Italy, Germany, Spain, and the United Kingdom: a burden of illness study. *Clin Outcomes*  
8 *Res CEOR* 2015;**7**:163–71. doi:10.2147/CEOR.S78132  
9  
10 90 Keating CL, Peeters A, Swinburn BA, *et al.* Utility-based quality of life associated with  
11 overweight and obesity: the Australian diabetes, obesity, and lifestyle study. *Obes Silver Spring*  
12 *Md* 2013;**21**:652–5. doi:10.1002/oby.20290  
13  
14 91 U.S. Census Bureau, Population Division. Population Estimates. Accessed on  
15 <http://www.census.gov/popest/index.html> at Apr 23, 2015.  
16  
17 92 Anstee QM, Targher G, Day CP. Progression of NAFLD to diabetes mellitus, cardiovascular  
18 disease or cirrhosis. *Nat Rev Gastroenterol Hepatol* 2013;**10**:330–44.  
19 doi:10.1038/nrgastro.2013.41  
20  
21 93 Bruno S, Maisonneuve P, Castellana P, *et al.* Incidence and risk factors for non-alcoholic  
22 steatohepatitis: prospective study of 5408 women enrolled in Italian tamoxifen  
23 chemoprevention trial. *BMJ* 2005;**330**:932. doi:10.1136/bmj.38391.663287.E0  
24  
25 94 Ekstedt M, Franzén LE, Mathiesen UL, *et al.* Long-term follow-up of patients with NAFLD and  
26 elevated liver enzymes. *Hepatol Baltim Md* 2006;**44**:865–73. doi:10.1002/hep.21327  
27  
28 95 Haukeland JW, Lorgen I, Schreiner LT, *et al.* Incidence rates and causes of cirrhosis in a  
29 Norwegian population. *Scand J Gastroenterol* 2007;**42**:1501–8.  
30 doi:10.1080/00365520701478014  
31  
32 96 Musso G, Cassader M, Bo S, *et al.* Sterol regulatory element-binding factor 2 (SREBF-2) predicts  
33 7-year NAFLD incidence and severity of liver disease and lipoprotein and glucose  
34 dysmetabolism. *Diabetes* 2013;**62**:1109–20. doi:10.2337/db12-0858  
35  
36 97 Omagari K, Kadokawa Y, Masuda J-I, *et al.* Fatty liver in non-alcoholic non-overweight Japanese  
37 adults: incidence and clinical characteristics. *J Gastroenterol Hepatol* 2002;**17**:1098–105.  
38  
39 98 Rafiq N, Bai C, Fang Y, *et al.* Long-term follow-up of patients with nonalcoholic fatty liver. *Clin*  
40 *Gastroenterol Hepatol Off Clin Pract J Am Gastroenterol Assoc* 2009;**7**:234–8.  
41 doi:10.1016/j.cgh.2008.11.005  
42  
43 99 Wong VW-S, Wong GL-H, Yeung DK-W, *et al.* Incidence of non-alcoholic fatty liver disease in  
44 Hong Kong: a population study with paired proton-magnetic resonance spectroscopy. *J Hepatol*  
45 2015;**62**:182–9. doi:10.1016/j.jhep.2014.08.041  
46  
47 100 Zelber-Sagi S, Lotan R, Shlomain A, *et al.* Predictors for incidence and remission of NAFLD in the  
48 general population during a seven-year prospective follow-up. *J Hepatol* 2012;**56**:1145–51.  
49 doi:10.1016/j.jhep.2011.12.011  
50  
51 101 Kawamura Y, Arase Y, Ikeda K, *et al.* Large-scale long-term follow-up study of Japanese patients  
52 with non-alcoholic Fatty liver disease for the onset of hepatocellular carcinoma. *Am J*  
53 *Gastroenterol* 2012;**107**:253–61. doi:10.1038/ajg.2011.327  
54  
55  
56  
57  
58  
59  
60

- 1  
2  
3 102 Njei B, Rotman Y, Ditah I, *et al.* Emerging trends in hepatocellular carcinoma incidence and  
4 mortality. *Hepatol Baltim Md* 2015;**61**:191–9. doi:10.1002/hep.27388  
5  
6 103 El-Serag HB, Mason AC. Rising incidence of hepatocellular carcinoma in the United States. *N*  
7 *Engl J Med* 1999;**340**:745–50. doi:10.1056/NEJM199903113401001  
8  
9 104 Lazo M, Hernaez R, Bonekamp S, *et al.* Non-alcoholic fatty liver disease and mortality among US  
10 adults: prospective cohort study. *BMJ* 2011;**343**:d6891.  
11  
12 105 Stepanova M, Rafiq N, Makhlof H, *et al.* Predictors of all-cause mortality and liver-related  
13 mortality in patients with non-alcoholic fatty liver disease (NAFLD). *Dig Dis Sci* 2013;**58**:3017–  
14 23. doi:10.1007/s10620-013-2743-5  
15  
16 106 Söderberg C, Stål P, Askling J, *et al.* Decreased survival of subjects with elevated liver function  
17 tests during a 28-year follow-up. *Hepatol Baltim Md* 2010;**51**:595–602. doi:10.1002/hep.23314  
18  
19 107 Hafliadottir S, Jonasson JG, Norland H, *et al.* Long-term follow-up and liver-related death rate  
20 in patients with non-alcoholic and alcoholic related fatty liver disease. *BMC Gastroenterol*  
21 2014;**14**:166. doi:10.1186/1471-230X-14-166  
22  
23 108 *National Heart, Lung, and Blood Institute . Morbidity & Mortality: 2012 Chart Book on*  
24 *Cardiovascular, Lung, and Blood Diseases. National Institutes of Health. National Heart, Lung,*  
25 *and Blood Institute. 2012.*  
26  
27 109 *National Heart, Lung, and Blood Institute . Incidence and Prevalence: 2006 Chart Book on*  
28 *Cardiovascular and Lung Diseases. National Institutes of Health. National Heart, Lung, and*  
29 *Blood Institute. 2006.*  
30  
31 110 Fishman EI, Stokes A, Preston SH. The dynamics of diabetes among birth cohorts in the U.S.  
32 *Diabetes Care* 2014;**37**:1052–9. doi:10.2337/dc13-1982  
33  
34 111 Daouli J, Davillas A, Demoussis M, *et al.* Obesity persistence and duration dependence:  
35 evidence from a cohort of US adults (1985-2010). *Econ Hum Biol* 2014;**12**:30–44.  
36 doi:10.1016/j.ehb.2013.07.002  
37  
38 112 Gordon-Larsen P, Adair LS, Nelson MC, *et al.* Five-year obesity incidence in the transition period  
39 between adolescence and adulthood: the National Longitudinal Study of Adolescent Health. *Am*  
40 *J Clin Nutr* 2004;**80**:569–75.  
41  
42 113 Parikh NI, Pencina MJ, Wang TJ, *et al.* Increasing trends in incidence of overweight and obesity  
43 over 5 decades. *Am J Med* 2007;**120**:242–50. doi:10.1016/j.amjmed.2006.06.004  
44  
45 114 Williamson DF, Kahn HS, Byers T. The 10-y incidence of obesity and major weight gain in black  
46 and white US women aged 30-55 y. *Am J Clin Nutr* 1991;**53**:1515S–1518S.  
47  
48 115 Schneider ALC, Lazo M, Selvin E, *et al.* Racial differences in nonalcoholic fatty liver disease in the  
49 U.S. population. *Obes Silver Spring Md* 2014;**22**:292–9. doi:10.1002/oby.20426  
50  
51 116 Kelishadi R, Cook SR, Adibi A, *et al.* Association of the components of the metabolic syndrome  
52 with non-alcoholic fatty liver disease among normal-weight, overweight and obese children and  
53 adolescents. *Diabetol Metab Syndr* 2009;**1**:29. doi:10.1186/1758-5996-1-29  
54  
55  
56  
57  
58  
59  
60

- 1  
2  
3 117 Peng L, Wang J, Li F. Weight reduction for non-alcoholic fatty liver disease. *Cochrane Database Syst Rev* 2011;:CD003619. doi:10.1002/14651858.CD003619.pub3  
4  
5  
6 118 Dassanayake AS, Kasturiratne A, Rajindrajith S, *et al*. Prevalence and risk factors for non-  
7 alcoholic fatty liver disease among adults in an urban Sri Lankan population. *J Gastroenterol Hepatol* 2009;**24**:1284–8. doi:10.1111/j.1440-1746.2009.05831.x  
8  
9  
10 119 Lee K, Sung J-A, Kim J-S, *et al*. The roles of obesity and gender on the relationship between  
11 metabolic risk factors and non-alcoholic fatty liver disease in Koreans. *Diabetes Metab Res Rev*  
12 2009;**25**:150–5. doi:10.1002/dmrr.924  
13  
14 120 Zeb I, Katz R, Nasir K, *et al*. Relation of nonalcoholic fatty liver disease to the metabolic  
15 syndrome: the Multi-Ethnic Study of Atherosclerosis. *J Cardiovasc Comput Tomogr* 2013;**7**:311–  
16 8. doi:10.1016/j.jcct.2013.08.011  
17  
18 121 Chan W-K, Tan AT-B, Vethakkan SR, *et al*. Non-alcoholic fatty liver disease in diabetics--  
19 prevalence and predictive factors in a multiracial hospital clinic population in Malaysia. *J Gastroenterol Hepatol* 2013;**28**:1375–83. doi:10.1111/jgh.12204  
20  
21 122 Papandreou D, Karabouta Z, Pantoleon A, *et al*. Investigation of anthropometric, biochemical  
22 and dietary parameters of obese children with and without non-alcoholic fatty liver disease.  
23 *Appetite* 2012;**59**:939–44. doi:10.1016/j.appet.2012.09.006  
24  
25 123 Wong VW-S, Wong GL-H, Yip GW-K, *et al*. Coronary artery disease and cardiovascular outcomes  
26 in patients with non-alcoholic fatty liver disease. *Gut* 2011;**60**:1721–7.  
27 doi:10.1136/gut.2011.242016  
28  
29 124 Hamaguchi M, Kojima T, Takeda N, *et al*. Nonalcoholic fatty liver disease is a novel predictor of  
30 cardiovascular disease. *World J Gastroenterol* 2007;**13**:1579–84.  
31  
32 125 Fan J-G, Li F, Cai X-B, *et al*. Effects of nonalcoholic fatty liver disease on the development of  
33 metabolic disorders. *J Gastroenterol Hepatol* 2007;**22**:1086–91. doi:10.1111/j.1440-  
34 1746.2006.04781.x  
35  
36 126 Targher G, Bertolini L, Rodella S, *et al*. Nonalcoholic fatty liver disease is independently  
37 associated with an increased incidence of cardiovascular events in type 2 diabetic patients.  
38 *Diabetes Care* 2007;**30**:2119–21. doi:10.2337/dc07-0349  
39  
40 127 Treeprasertsuk S, Leverage S, Adams LA, *et al*. The Framingham risk score and heart disease in  
41 nonalcoholic fatty liver disease. *Liver Int Off J Int Assoc Study Liver* 2012;**32**:945–50.  
42 doi:10.1111/j.1478-3231.2011.02753.x  
43  
44 128 Canoy D, Cairns BJ, Balkwill A, *et al*. Body mass index and incident coronary heart disease in  
45 women: a population-based prospective study. *BMC Med* 2013;**11**:87. doi:10.1186/1741-7015-  
46 11-87  
47  
48 129 Global Burden of Metabolic Risk Factors for Chronic Diseases Collaboration (BMI Mediated  
49 Effects), Lu Y, Hajifathalian K, *et al*. Metabolic mediators of the effects of body-mass index,  
50 overweight, and obesity on coronary heart disease and stroke: a pooled analysis of 97  
51 prospective cohorts with 1·8 million participants. *Lancet Lond Engl* 2014;**383**:970–83.  
52 doi:10.1016/S0140-6736(13)61836-X  
53  
54  
55  
56  
57  
58  
59  
60

- 1  
2  
3 130 Gruson E, Montaye M, Kee F, *et al.* Anthropometric assessment of abdominal obesity and  
4 coronary heart disease risk in men: the PRIME study. *Heart Br Card Soc* 2010;**96**:136–40.  
5 doi:10.1136/hrt.2009.171447  
6
- 7 131 de Hollander EL, Bogers RP, Boshuizen HC, *et al.* Influence of calendar period on the association  
8 between BMI and coronary heart disease: a meta-analysis of 31 cohorts. *Obes Silver Spring Md*  
9 2013;**21**:865–80. doi:10.1002/oby.20043  
10
- 11 132 Labounty TM, Gomez MJ, Achenbach S, *et al.* Body mass index and the prevalence, severity,  
12 and risk of coronary artery disease: an international multicentre study of 13,874 patients. *Eur*  
13 *Heart J Cardiovasc Imaging* 2013;**14**:456–63. doi:10.1093/ehjci/jes179  
14
- 15 133 Mongraw-Chaffin ML, Peters SAE, Huxley RR, *et al.* The sex-specific association between BMI  
16 and coronary heart disease: a systematic review and meta-analysis of 95 cohorts with 1.2  
17 million participants. *Lancet Diabetes Endocrinol* 2015;**3**:437–49. doi:10.1016/S2213-  
18 8587(15)00086-8  
19
- 20 134 Park YS, Kim J-S. Obesity phenotype and coronary heart disease risk as estimated by the  
21 Framingham risk score. *J Korean Med Sci* 2012;**27**:243–9. doi:10.3346/jkms.2012.27.3.243  
22  
23
- 24 135 Taylor AE, Ebrahim S, Ben-Shlomo Y, *et al.* Comparison of the associations of body mass index  
25 and measures of central adiposity and fat mass with coronary heart disease, diabetes, and all-  
26 cause mortality: a study using data from 4 UK cohorts. *Am J Clin Nutr* 2010;**91**:547–56.  
27 doi:10.3945/ajcn.2009.28757  
28
- 29 136 Peters SAE, Huxley RR, Woodward M. Diabetes as risk factor for incident coronary heart disease  
30 in women compared with men: a systematic review and meta-analysis of 64 cohorts including  
31 858,507 individuals and 28,203 coronary events. *Diabetologia* 2014;**57**:1542–51.  
32 doi:10.1007/s00125-014-3260-6  
33
- 34 137 Shibata M, Kihara Y, Taguchi M, *et al.* Nonalcoholic fatty liver disease is a risk factor for type 2  
35 diabetes in middle-aged Japanese men. *Diabetes Care* 2007;**30**:2940–4. doi:10.2337/dc07-0792  
36
- 37 138 Kim C-H, Park J-Y, Lee K-U, *et al.* Fatty liver is an independent risk factor for the development of  
38 Type 2 diabetes in Korean adults. *Diabet Med J Br Diabet Assoc* 2008;**25**:476–81.  
39 doi:10.1111/j.1464-5491.2008.02410.x  
40
- 41 139 Yamada T, Fukatsu M, Suzuki S, *et al.* Fatty liver predicts impaired fasting glucose and type 2  
42 diabetes mellitus in Japanese undergoing a health checkup. *J Gastroenterol Hepatol*  
43 2010;**25**:352–6. doi:10.1111/j.1440-1746.2009.05998.x  
44
- 45 140 Sung K-C, Kim SH. Interrelationship between fatty liver and insulin resistance in the  
46 development of type 2 diabetes. *J Clin Endocrinol Metab* 2011;**96**:1093–7. doi:10.1210/jc.2010-  
47 2190  
48
- 49 141 Kasturiratne A, Weerasinghe S, Dassanayake AS, *et al.* Influence of non-alcoholic fatty liver  
50 disease on the development of diabetes mellitus. *J Gastroenterol Hepatol* 2013;**28**:142–7.  
51 doi:10.1111/j.1440-1746.2012.07264.x  
52
- 53 142 Abdullah A, Peeters A, de Courten M, *et al.* The magnitude of association between overweight  
54 and obesity and the risk of diabetes: a meta-analysis of prospective cohort studies. *Diabetes*  
55 *Res Clin Pract* 2010;**89**:309–19. doi:10.1016/j.diabres.2010.04.012  
56  
57  
58  
59  
60

- 1  
2  
3 143 Nyamdorj R, Qiao Q, Söderberg S, *et al.* BMI compared with central obesity indicators as a  
4 predictor of diabetes incidence in Mauritius. *Obes Silver Spring Md* 2009;**17**:342–8.  
5 doi:10.1038/oby.2008.503  
6
- 7 144 Rolando L, Byrne DW, McGown PW, *et al.* Health risk factor modification predicts incidence of  
8 diabetes in an employee population: results of an 8-year longitudinal cohort study. *J Occup*  
9 *Environ Med* 2013;**55**:410–5. doi:10.1097/JOM.0b013e31827cbaec  
10
- 11 145 Rodbard HW, Bays HE, Gavin JR, *et al.* Rate and risk predictors for development of self-reported  
12 type-2 diabetes mellitus over a 5-year period: the SHIELD study. *Int J Clin Pract* 2012;**66**:684–91.  
13 doi:10.1111/j.1742-1241.2012.02952.x  
14
- 15 146 Kodama S, Horikawa C, Fujihara K, *et al.* Quantitative relationship between body weight gain in  
16 adulthood and incident type 2 diabetes: a meta-analysis. *Obes Rev Off J Int Assoc Study Obes*  
17 2014;**15**:202–14. doi:10.1111/obr.12129  
18
- 19 147 Bell JA, Kivimaki M, Hamer M. Metabolically healthy obesity and risk of incident type 2  
20 diabetes: a meta-analysis of prospective cohort studies. *Obes Rev Off J Int Assoc Study Obes*  
21 2014;**15**:504–15. doi:10.1111/obr.12157  
22
- 23 148 Guh DP, Zhang W, Bansback N, *et al.* The incidence of co-morbidities related to obesity and  
24 overweight: a systematic review and meta-analysis. *BMC Public Health* 2009;**9**:88.  
25 doi:10.1186/1471-2458-9-88  
26
- 27 149 Emond JA, Patterson RE, Jardack PM, *et al.* Using doubly labeled water to validate associations  
28 between sugar-sweetened beverage intake and body mass among White and African-American  
29 adults. *Int J Obes 2005* 2014;**38**:603–9. doi:10.1038/ijo.2013.130  
30
- 31 150 Grimes CA, Riddell LJ, Campbell KJ, *et al.* Dietary salt intake, sugar-sweetened beverage  
32 consumption, and obesity risk. *Pediatrics* 2013;**131**:14–21. doi:10.1542/peds.2012-1628  
33
- 34 151 Gregg EW, Boyle JP, Thompson TJ, *et al.* Modeling the impact of prevention policies on future  
35 diabetes prevalence in the United States: 2010-2030. *Popul Health Metr* 2013;**11**:18.  
36 doi:10.1186/1478-7954-11-18  
37
- 38 152 Guariguata L, Whiting DR, Hambleton I, *et al.* Global estimates of diabetes prevalence for 2013  
39 and projections for 2035. *Diabetes Res Clin Pract* 2014;**103**:137–49.  
40 doi:10.1016/j.diabres.2013.11.002  
41
- 42 153 Huang ES, Basu A, O'Grady M, *et al.* Projecting the future diabetes population size and related  
43 costs for the U.S. *Diabetes Care* 2009;**32**:2225–9. doi:10.2337/dc09-0459  
44
- 45 154 Finkelstein EA, Khavjou OA, Thompson H, *et al.* Obesity and severe obesity forecasts through  
46 2030. *Am J Prev Med* 2012;**42**:563–70. doi:10.1016/j.amepre.2011.10.026  
47
- 48 155 Odden MC, Coxson PG, Moran A, *et al.* The impact of the aging population on coronary heart  
49 disease in the United States. *Am J Med* 2011;**124**:827–833.e5.  
50 doi:10.1016/j.amjmed.2011.04.010  
51
- 52 156 American Cancer Society. Cancer Facts & Figures 2012. Atlanta: American Cancer Society; 2012.  
53  
54  
55  
56  
57  
58  
59  
60

- 1  
2  
3 157 Younossi ZM, Blissett D, Blissett R, *et al.* The economic and clinical burden of nonalcoholic fatty  
4 liver disease in the United States and Europe. *Hepatology* 2016;**64**:1577–86.  
5 doi:10.1002/hep.28785  
6  
7 158 Ervin RB, Ogden CL. Consumption of added sugars among U.S. adults, 2005-2010. *NCHS Data*  
8 *Brief* 2013;;1–8.  
9  
10 159 Morgan Stanley Research (2015). The bittersweet aftertaste of sugar. March 18, 2015.  
11 [http://static.latribune.fr/463077/etude-morgan-stanley-impact-diabete-sur-l-economie-](http://static.latribune.fr/463077/etude-morgan-stanley-impact-diabete-sur-l-economie-mondiale.pdf)  
12 [mondiale.pdf](http://static.latribune.fr/463077/etude-morgan-stanley-impact-diabete-sur-l-economie-mondiale.pdf).  
13  
14 160 Gombi-Vaca MF, Sichieri R, Verly-Jr E. Caloric compensation for sugar-sweetened beverages in  
15 meals: A population-based study in Brazil. *Appetite* 2016;**98**:67–73.  
16 doi:10.1016/j.appet.2015.12.014  
17  
18 161 Saadeh S, Younossi ZM, Remer EM, *et al.* The utility of radiological imaging in nonalcoholic fatty  
19 liver disease. *Gastroenterology* 2002;**123**:745–50.  
20  
21 162 Lustig RH. Sickeningly Sweet: Does Sugar Cause Type 2 Diabetes? Yes. *Can J Diabetes*  
22 2016;**40**:282–6. doi:10.1016/j.jcjd.2016.01.004  
23  
24  
25  
26  
27  
28  
29  
30  
31  
32  
33  
34  
35  
36  
37  
38  
39  
40  
41  
42  
43  
44  
45  
46  
47  
48  
49  
50  
51  
52  
53  
54  
55  
56  
57  
58  
59  
60



Figure 1. Model state and covariate structure.

Each individual gets assigned a state in each chain at the start of the simulation and their specific covariates (age, sex, ethnicity, high/low sugar consumption). Circles represent disease states. Solid lines indicate a possible transition pathway between states. Coloured lines indicate how being in a state within one chain can affect the value of the transition probability between two states in another chain. These are split into three categories: pink striped lines indicate the effect of NAFLD on progression in the BMI, T2D and CHD chains. Blue dotted lines indicate the effect of overweight and obesity on progression in the NAFLD, T2D and CHD chains. The green dotted line indicates the effect of T2D on progression in the CHD chain. 3 chains contain disease related deaths and the model contains a non-disease related death state for other causes of mortality. The states of individuals are updated every cycle (i.e. annually) for 20 years. Each cycle the state distributions and their related costs and DALYs are generated as output.

NAFLD: non-alcoholic fatty liver disease, T2D: type 2 diabetes, CHD: coronary heart disease, NASH: non-alcoholic steatohepatitis, HCC: hepatocellular carcinoma, DALYs: disability-adjusted life years.

340x156mm (300 x 300 DPI)

1  
2  
3  
4  
5  
6  
7  
8  
9  
10  
11  
12  
13  
14  
15  
16  
17  
18  
19  
20  
21  
22  
23  
24  
25  
26  
27  
28  
29  
30  
31  
32  
33  
34  
35  
36  
37  
38  
39  
40  
41  
42  
43  
44  
45  
46  
47  
48  
49  
50  
51  
52  
53  
54  
55  
56  
57  
58  
59  
60



Figure 2, graphs A to H. reduction in population prevalence of disease due to interventions. Lines represent mean values +/- one standard deviation. 0% is the baseline, representing no intervention. The blue lines with diamonds indicate a reduction of added sugar of 20%. The red lines with crosses represent a reduction of 50%. NASH; non-alcoholic steatohepatitis.

249x346mm (300 x 300 DPI)

1  
2  
3  
4  
5  
6  
7  
8  
9  
10  
11  
12  
13  
14  
15  
16  
17  
18  
19  
20  
21  
22  
23  
24  
25  
26  
27  
28  
29  
30  
31  
32  
33  
34  
35  
36  
37  
38  
39  
40  
41  
42  
43  
44  
45  
46  
47  
48  
49  
50  
51  
52  
53  
54  
55  
56  
57  
58  
59  
60



Figure 3. Tornado diagram of the ten most critical variables on total costs averted in the year 2035.  
 Figure 4. Tornado diagram of the ten most critical variables on total DALYs averted in the year 2035.

73x28mm (300 x 300 DPI)

Peer review only

## Online supplement

## Non-alcoholic fatty liver disease as a mediator of sugar effects; implications for the health and economic benefits of interventions in the US

*Rick A Vreman, Alex J Goodell, Luis A Rodriguez, Travis C Porco, Robert H Lustig, James G Kahn*

### Content

|                                                                                                        |    |
|--------------------------------------------------------------------------------------------------------|----|
| <b>Table 1.</b> Selected model parameter values and ranges .....                                       | 2  |
| <b>Table 2.</b> Age distribution .....                                                                 | 3  |
| <b>Table 3.</b> Sex distribution .....                                                                 | 4  |
| <b>Table 4.</b> Ethnic distribution .....                                                              | 4  |
| <b>Table 5.</b> Non-alcoholic fatty liver disease prevalence percentage at start of simulation .....   | 4  |
| <b>Table 6.</b> Hepatocellular carcinoma incidence rate from NASH .....                                | 4  |
| <b>Table 7.</b> Hepatocellular carcinoma incidence rate from cirrhosis .....                           | 4  |
| <b>Table 8.</b> Overweight and obesity prevalence percentages at the start of the simulation .....     | 5  |
| <b>Table 9.</b> Type 2 diabetes prevalence percentage at the start of the simulation .....             | 6  |
| <b>Table 10.</b> Type 2 diabetes incidence rate .....                                                  | 7  |
| <b>Table 11.</b> Coronary heart disease prevalence percentage at the start of the simulation .....     | 8  |
| <b>Table 12.</b> Coronary heart disease incidence rate (in %) .....                                    | 9  |
| <b>Table 13.</b> Added sugar consumption distributions .....                                           | 9  |
| <b>Table 14.</b> Type 2 diabetes mortality rate .....                                                  | 10 |
| <b>Table 15.</b> Coronary heart disease mortality rate (in %) .....                                    | 10 |
| <b>Table 16.</b> Non-disease related mortality rate (in %) .....                                       | 11 |
| <b>Table 17.</b> IHME health-adjusted life expectancy and discounted life expectancy for females ..... | 12 |
| <b>Table 18.</b> IHME health-adjusted life expectancy and discounted life expectancy for males .....   | 13 |
| <b>References</b> .....                                                                                | 14 |

Table 1. Selected model parameter values and ranges.

| Parameter                                                   | Distribution | Mean      | Min      | Max     | Source     |
|-------------------------------------------------------------|--------------|-----------|----------|---------|------------|
| <b>Initialization</b>                                       |              |           |          |         |            |
| Age distribution                                            | Fixed        | OS2*1     | -        | -       | [1]        |
| Sex distribution                                            | Fixed        | OS3*2     | -        | -       | [1]        |
| Ethnicity distribution                                      | Fixed        | OS4*3     | -        | -       | [1]        |
| Steatosis prevalence                                        | Beta         | 27.955%*4 | 18.637%  | 41.933% | [2-4]      |
| NASH prevalence                                             | Beta         | 3.141%*4  | 2.094%   | 4.712%  | [2-4]      |
| Cirrhosis prevalence                                        | Beta         | 0.314%*4  | 0.209%   | 0.471%  | [5-8]      |
| HCC prevalence                                              | Beta         | 0.025%*4  | 0.017%   | 0.038%  | [9,10]     |
| CHD prevalence                                              | Fixed        | 6.544%*5  | -        | -       | [11]       |
| T2D prevalence                                              | Fixed        | 9.447%*6  | -        | -       | [11]       |
| Overweight prevalence                                       | Fixed        | 33.473%*7 | -        | -       | [11]       |
| Obesity prevalence                                          | Fixed        | 37.391%*8 | -        | -       | [11]       |
| High sugar consumption                                      | Beta         | 57.278%*9 | 38.186%  | 85.917% | [12,13]    |
| <b>Baseline transition probabilities</b>                    |              |           |          |         |            |
| Non-NAFLD -> steatosis                                      | Beta         | 0.0100    | 0.006700 | 0.01500 | [14-22]    |
| Non-NAFLD -> NASH                                           | Beta         | 0.0003    | 0.000201 | 0.00045 | [14-22]    |
| Steatosis -> non-NAFLD                                      | Beta         | 0.0200    | 0.013400 | 0.03000 | [14-22]    |
| Steatosis -> NASH                                           | Beta         | 0.0060    | 0.004020 | 0.00900 | [14-22]    |
| Steatosis -> cirrhosis                                      | Beta         | 0.0002    | 0.000134 | 0.00030 | [14-22]    |
| NASH -> non-NAFLD                                           | Beta         | 0.0010    | 0.000670 | 0.00150 | [14-22]    |
| NASH -> steatosis                                           | Beta         | 0.0200    | 0.013400 | 0.03000 | [14-22]    |
| NASH -> cirrhosis                                           | Beta         | 0.0020    | 0.001340 | 0.00300 | [14-22]    |
| NASH -> HCC                                                 | Beta         | 0.0001*10 | 0.000067 | 0.00015 | [14-25]    |
| NASH -> liver death                                         | Beta         | 0.0038    | 0.002546 | 0.00570 | [26-29]    |
| Cirrhosis -> HCC                                            | Beta         | 0.0200*10 | 0.013400 | 0.03000 | [14-25]    |
| Cirrhosis -> liver death                                    | Beta         | 0.0340    | 0.022780 | 0.05100 | [26-29]    |
| HCC -> liver death                                          | Beta         | 0.5000    | 0.335000 | 0.75000 | [26-29]    |
| Non-CHD -> CHD                                              | Beta         | 0.0045*11 | 0.003015 | 0.00675 | [30,31]    |
| CHD -> CHD death                                            | Beta         | 0.0100*12 | 0.006700 | 0.01500 | [30-32]    |
| Non-T2D -> T2D                                              | Beta         | 0.0045*13 | 0.003015 | 0.00675 | [33,34]    |
| T2D -> T2D death                                            | Beta         | 0.0100*14 | 0.006700 | 0.01500 | [32-34]    |
| Healthy weight -> overweight                                | Beta         | 0.0500    | 0.033500 | 0.07500 | [35-38]    |
| Healthy weight -> obese                                     | Beta         | 0.0060    | 0.004020 | 0.00900 | [35-38]    |
| Overweight -> healthy weight                                | Beta         | 0.0500    | 0.033500 | 0.07500 | [35-38]    |
| Overweight -> obese                                         | Beta         | 0.0180    | 0.012060 | 0.02700 | [35-38]    |
| Obese -> healthy weight                                     | Beta         | 0.0060    | 0.004020 | 0.00900 | [35-38]    |
| Obese -> overweight                                         | Beta         | 0.0350    | 0.023450 | 0.05250 | [35-38]    |
| Each alive state -> non-disease related death               | Beta         | 0.0100*15 | 0.006700 | 0.01500 | [32]       |
| <b>Risk factors</b>                                         |              |           |          |         |            |
| NHB ethnicity for progression within NAFLD                  | Beta         | 0.93      | 0.70     | 1.00    | [39]       |
| Hispanic ethnicity for progression within NAFLD             | Beta         | 1.67      | 1.22     | 2.22    | [39]       |
| Overweight for progression within NAFLD                     | Beta         | 2.19      | 1.60     | 3.38    | [15,40-45] |
| Obesity for progression within NAFLD                        | Beta         | 3.14      | 2.07     | 5.28    | [15,40-45] |
| High sugar consumption for progression within NAFLD         | Beta         | 2.00      | 1.50     | 3.00    | [46,47]    |
| NAFLD for TP non-CHD -> CHD                                 | Beta         | 2.31      | 1.66     | 3.62    | [48-52]    |
| Overweight for TP non-CHD -> CHD                            | Beta         | 1.22      | 1.12     | 1.32    | [53-60]    |
| Obesity for TP non-CHD -> CHD                               | Beta         | 1.60      | 1.43     | 1.79    | [53-60]    |
| T2D for TP non-CHD -> CHD                                   | Beta         | 2.24      | 1.64     | 3.06    | [61]       |
| NAFLD for TP non-T2D -> T2D                                 | Beta         | 2.73      | 1.87     | 4.46    | [62-68]    |
| Overweight for TP non-T2D -> T2D                            | Beta         | 2.18      | 1.59     | 3.36    | [69-75]    |
| Obesity for TP non-T2D -> T2D                               | Beta         | 3.36      | 2.18     | 5.72    | [69-75]    |
| NAFLD for progression within the BMI chain                  | Beta         | 2.19      | 1.60     | 3.38    | [15,40-45] |
| High sugar consumption for progression within the BMI chain | Beta         | 2.60      | 1.20     | 6.00    | [76,77]    |
| <b>Regression rates</b>                                     |              |           |          |         |            |
| CHD incidence regression rate/year                          | Beta         | 0.985     | 0.970    | 1.00    | [78-81]    |
| CHD mortality regression rate/year                          | Beta         | 0.979     | 0.958    | 1.00    | [78-81]    |
| Non-disease mortality regression rate/year (20-30)          | Beta         | 1.000     | 0.990    | 1.00    | [32]       |
| Non-disease mortality regression rate/year (30-55)          | Beta         | 0.980     | 0.960    | 1.00    | [32]       |
| Non-disease mortality regression rate/year (55+)            | Beta         | 0.970     | 0.940    | 1.00    | [32]       |

1  
2  
3  
4  
5  
6  
7  
8  
9  
10  
11  
12  
13  
14  
15  
16  
17  
18  
19  
20  
21  
22  
23

| Table 1. Continued                         |  |              |            |       |         |
|--------------------------------------------|--|--------------|------------|-------|---------|
| Costs (annual direct medical, in 2015 USD) |  | Distribution | Mean value | SD    | Source  |
| Steatosis                                  |  | Gamma        | 134        | 50    | [82-85] |
| NASH                                       |  | Gamma        | 267        | 100   | [82-85] |
| Cirrhosis                                  |  | Gamma        | 2861       | 1073  | [86]    |
| HCC                                        |  | Gamma        | 42644      | 15992 | [87,88] |
| CHD                                        |  | Gamma        | 13233      | 4962  | [89]    |
| T2D                                        |  | Gamma        | 8170       | 3064  | [90]    |
| Overweight                                 |  | Gamma        | 343        | 129   | [91]    |
| Obesity                                    |  | Gamma        | 916        | 344   | [91]    |
| <b>Disability weights</b>                  |  |              |            |       |         |
|                                            |  | Distribution | Mean value | Min   | Max     |
| NASH                                       |  | Beta         | 0.033      | 0.017 | 0.066   |
| Cirrhosis                                  |  | Beta         | 0.194      | 0.127 | 0.273   |
| HCC                                        |  | Beta         | 0.294      | 0.199 | 0.411   |
| CHD                                        |  | Beta         | 0.066      | 0.043 | 0.095   |
| T2D                                        |  | Beta         | 0.150      | 0.080 | 0.220   |
| Obesity                                    |  | Beta         | 0.012      | 0.001 | 0.022   |

SD: standard deviation, CHD: coronary heart disease, T2D: type 2 diabetes, NAFLD: non-alcoholic fatty liver disease (steatosis, NASH & cirrhosis), NASH: non-alcoholic steatohepatitis, HCC: hepatocellular carcinoma, Hisp: Hispanic, NHW: non-Hispanic white, NHB: non-Hispanic black, TP: transition probability, OR: odds ratio  
 \*1 See online supplement table 2. \*2 See online supplement table 3. \*3 See online supplement table 4. \*4 See online supplement table 5.  
 \*5 See online supplement table 6. \*6 See online supplement table 7. \*7 See online supplement table 8. \*8 See online supplement table 9.  
 \*9 See online supplement table 10. \*10 See online supplement table 11. \*11 See online supplement table 12. \*12 See online supplement table 13. \*13 See online supplement table 14. \*14 See online supplement table 15. \*15 See online supplement table 16.

Table 2. Age distribution.[1]

24  
25  
26  
27  
28  
29  
30  
31  
32  
33  
34  
35  
36  
37  
38  
39  
40  
41  
42  
43  
44  
45  
46  
47  
48  
49  
50  
51  
52  
53  
54  
55  
56  
57  
58  
59  
60

| Age | Percentage | Age | Percentage |
|-----|------------|-----|------------|
| 20  | 1.9194     | 55  | 1.7505     |
| 21  | 1.9194     | 56  | 1.7505     |
| 22  | 1.9194     | 57  | 1.7505     |
| 23  | 1.9194     | 58  | 1.7505     |
| 24  | 1.9194     | 59  | 1.7505     |
| 25  | 1.8701     | 60  | 1.5024     |
| 26  | 1.8701     | 61  | 1.5024     |
| 27  | 1.8701     | 62  | 1.5024     |
| 28  | 1.8701     | 63  | 1.5024     |
| 29  | 1.8701     | 64  | 1.5024     |
| 30  | 1.7749     | 65  | 1.1073     |
| 31  | 1.7749     | 66  | 1.1073     |
| 32  | 1.7749     | 67  | 1.1073     |
| 33  | 1.7749     | 68  | 1.1073     |
| 34  | 1.7749     | 69  | 1.1073     |
| 35  | 1.7757     | 70  | 0.8256     |
| 36  | 1.7757     | 71  | 0.8256     |
| 37  | 1.7757     | 72  | 0.8256     |
| 38  | 1.7757     | 73  | 0.8256     |
| 39  | 1.7757     | 74  | 0.8256     |
| 40  | 1.8487     | 75  | 0.6473     |
| 41  | 1.8487     | 76  | 0.6473     |
| 42  | 1.8487     | 77  | 0.6473     |
| 43  | 1.8487     | 78  | 0.6473     |
| 44  | 1.8487     | 79  | 0.6473     |
| 45  | 2.0018     | 80  | 0.5093     |
| 46  | 2.0018     | 81  | 0.5093     |
| 47  | 2.0018     | 82  | 0.5093     |
| 48  | 2.0018     | 83  | 0.5093     |
| 49  | 2.0018     | 84  | 0.5093     |
| 50  | 1.9767     | 85+ | 2.4517     |
| 51  | 1.9767     |     |            |
| 52  | 1.9767     |     |            |
| 53  | 1.9767     |     |            |
| 54  | 1.9767     |     |            |

Table 3. Sex distribution.[1]

| Sex    | Percentage |
|--------|------------|
| Male   | 48.4388    |
| Female | 51.5612    |

Table 4. Ethnic distribution.[1]

| Age                | Percentage |
|--------------------|------------|
| Hispanic           | 14.0377    |
| Non-hispanic White | 74.3771    |
| Non-hispanic Black | 11.5852    |

Table 5. Non-alcoholic fatty liver disease prevalence percentage at start of simulation.[2-10]

| Ethnicity | Steatosis | NASH | Cirrhosis | Hepatocellular carcinoma |
|-----------|-----------|------|-----------|--------------------------|
| Hispanic  | 40.05     | 4.5  | 0.45      | 0.0363                   |
| NH-White  | 26.70     | 3.0  | 0.30      | 0.0242                   |
| NH-Black  | 21.36     | 2.4  | 0.24      | 0.0194                   |

Table 6. Hepatocellular carcinoma incidence rate from NASH.[14-25]

| Age               | Incidence rate |
|-------------------|----------------|
| 40 to 44 years    | 3.64216E-05    |
| 45 to 49 years    | 4.64842E-05    |
| 50 to 54 years    | 5.93269E-05    |
| 55 to 59 years    | 7.57179E-05    |
| 60 to 64 years    | 9.66373E-05    |
| 65 to 69 years    | 0.000123336    |
| 70 to 74 years    | 0.000157412    |
| 75 to 79 years    | 0.000200902    |
| 80 years and over | 0.000256408    |

Table 7. Hepatocellular carcinoma incidence rate from cirrhosis.[14-25]

| Age               | Incidence rate |
|-------------------|----------------|
| 40 to 44 years    | 0.008844339    |
| 45 to 49 years    | 0.011287867    |
| 50 to 54 years    | 0.014406497    |
| 55 to 59 years    | 0.018386746    |
| 60 to 64 years    | 0.023466665    |
| 65 to 69 years    | 0.029950073    |
| 70 to 74 years    | 0.038224725    |
| 75 to 79 years    | 0.048785512    |
| 80 years and over | 0.062264050    |

**Table 8.** Overweight and obesity prevalence percentages at the start of the simulation.[11]

| Sex    | Ethnicity | Age   | Overweight percentage | Obesity percentage |
|--------|-----------|-------|-----------------------|--------------------|
| Male   | Hispanic  | 20-44 | 39.5                  | 36.8               |
| Male   | Hispanic  | 45-64 | 43.8                  | 41.0               |
| Male   | Hispanic  | 65+   | 42.8                  | 44.7               |
| Male   | White     | 20-44 | 35.7                  | 31.6               |
| Male   | White     | 45-64 | 40.8                  | 39.0               |
| Male   | White     | 65+   | 42.5                  | 36.9               |
| Male   | Black     | 20-44 | 28.7                  | 36.9               |
| Male   | Black     | 45-64 | 34.3                  | 40.6               |
| Male   | Black     | 65+   | 37.0                  | 36.7               |
| Female | Hispanic  | 20-44 | 33.2                  | 36.8               |
| Female | Hispanic  | 45-64 | 32.9                  | 52.9               |
| Female | Hispanic  | 65+   | 33.0                  | 49.3               |
| Female | White     | 20-44 | 25.3                  | 28.0               |
| Female | White     | 45-64 | 32.6                  | 37.4               |
| Female | White     | 65+   | 29.5                  | 44.3               |
| Female | Black     | 20-44 | 22.3                  | 56.1               |
| Female | Black     | 45-64 | 27.1                  | 61.8               |
| Female | Black     | 65+   | 25.8                  | 53.7               |

**Table 9.** Type 2 diabetes prevalence percentage at the start of the simulation.[11]

| Sex    | Ethnicity | Age   | Percentage with T2D |
|--------|-----------|-------|---------------------|
| Male   | Hispanic  | 20-24 | 0.90                |
| Male   | Hispanic  | 25-44 | 3.50                |
| Male   | Hispanic  | 45-54 | 14.20               |
| Male   | Hispanic  | 55-64 | 25.80               |
| Male   | Hispanic  | 65-74 | 32.80               |
| Male   | Hispanic  | 75-84 | 31.30               |
| Male   | Hispanic  | 85+   | 23.80               |
| Male   | NH-White  | 20-24 | 0.90                |
| Male   | NH-White  | 25-44 | 2.40                |
| Male   | NH-White  | 45-54 | 8.20                |
| Male   | NH-White  | 55-64 | 14.70               |
| Male   | NH-White  | 65-74 | 20.10               |
| Male   | NH-White  | 75-84 | 20.50               |
| Male   | NH-White  | 85+   | 17.90               |
| Male   | NH-Black  | 20-24 | 1.00                |
| Male   | NH-Black  | 25-44 | 5.00                |
| Male   | NH-Black  | 45-54 | 15.00               |
| Male   | NH-Black  | 55-64 | 24.00               |
| Male   | NH-Black  | 65-74 | 26.50               |
| Male   | NH-Black  | 75-84 | 39.00               |
| Male   | NH-Black  | 85+   | 18.70               |
| Female | Hispanic  | 20-24 | 0.90                |
| Female | Hispanic  | 25-44 | 3.60                |
| Female | Hispanic  | 45-54 | 10.30               |
| Female | Hispanic  | 55-64 | 24.00               |
| Female | Hispanic  | 65-74 | 34.80               |
| Female | Hispanic  | 75-84 | 32.40               |
| Female | Hispanic  | 85+   | 22.80               |
| Female | NH-White  | 20-24 | 1.20                |
| Female | NH-White  | 25-44 | 2.80                |
| Female | NH-White  | 45-54 | 7.30                |
| Female | NH-White  | 55-64 | 12.10               |
| Female | NH-White  | 65-74 | 17.00               |
| Female | NH-White  | 75-84 | 17.10               |
| Female | NH-White  | 85+   | 12.10               |
| Female | NH-Black  | 20-24 | 1.00                |
| Female | NH-Black  | 25-44 | 5.20                |
| Female | NH-Black  | 45-54 | 10.90               |
| Female | NH-Black  | 55-64 | 24.10               |
| Female | NH-Black  | 65-74 | 32.60               |
| Female | NH-Black  | 75-84 | 31.60               |
| Female | NH-Black  | 85+   | 20.20               |

1  
2  
3  
4  
5  
6  
7  
8  
9  
10  
11  
12  
13  
14  
15  
16  
17  
18  
19  
20  
21  
22  
23  
24  
25  
26  
27  
28  
29  
30  
31  
32  
33  
34  
35  
36  
37  
38  
39  
40  
41  
42  
43  
44  
45  
46  
47  
48  
49  
50  
51  
52  
53  
54  
55  
56  
57  
58  
59  
60

Table 10. Type 2 diabetes incidence rate.[33,34]

| Age   | Incidence rate |
|-------|----------------|
| 20-24 | 0.000447       |
| 25-29 | 0.000762       |
| 30-34 | 0.001090       |
| 35-39 | 0.001625       |
| 40-44 | 0.002880       |
| 45-49 | 0.003575       |
| 50-54 | 0.004957       |
| 55-59 | 0.005071       |
| 60-64 | 0.004662       |
| 65-69 | 0.004450       |
| 70-74 | 0.003925       |
| 75-79 | 0.003609       |
| 80+   | 0.003240       |

For peer review only

**Table 11.** Coronary heart disease prevalence percentage at the start of the simulation.[11]

| Sex    | Ethnicity | Age   | Percentage with CHD |
|--------|-----------|-------|---------------------|
| Male   | Hispanic  | 20-35 | 0.00                |
| Male   | Hispanic  | 35-44 | 1.30                |
| Male   | Hispanic  | 45-54 | 3.90                |
| Male   | Hispanic  | 55-64 | 10.60               |
| Male   | Hispanic  | 65-74 | 19.20               |
| Male   | Hispanic  | 75-84 | 23.50               |
| Male   | Hispanic  | 85+   | 23.80               |
| Male   | NH-White  | 20-35 | 0.00                |
| Male   | NH-White  | 35-44 | 1.20                |
| Male   | NH-White  | 45-54 | 6.00                |
| Male   | NH-White  | 55-64 | 13.80               |
| Male   | NH-White  | 65-74 | 23.30               |
| Male   | NH-White  | 75-84 | 31.80               |
| Male   | NH-White  | 85+   | 38.60               |
| Male   | NH-Black  | 20-35 | 0.00                |
| Male   | NH-Black  | 35-44 | 1.70                |
| Male   | NH-Black  | 45-54 | 7.50                |
| Male   | NH-Black  | 55-64 | 14.20               |
| Male   | NH-Black  | 65-74 | 16.90               |
| Male   | NH-Black  | 75-84 | 22.10               |
| Male   | NH-Black  | 85+   | 18.80               |
| Female | Hispanic  | 20-35 | 0.00                |
| Female | Hispanic  | 35-44 | 1.20                |
| Female | Hispanic  | 45-54 | 3.00                |
| Female | Hispanic  | 55-64 | 6.70                |
| Female | Hispanic  | 65-74 | 16.20               |
| Female | Hispanic  | 75-84 | 20.30               |
| Female | Hispanic  | 85+   | 23.90               |
| Female | NH-White  | 20-35 | 0.00                |
| Female | NH-White  | 35-44 | 0.90                |
| Female | NH-White  | 45-54 | 3.30                |
| Female | NH-White  | 55-64 | 6.70                |
| Female | NH-White  | 65-74 | 11.20               |
| Female | NH-White  | 75-84 | 18.40               |
| Female | NH-White  | 85+   | 24.30               |
| Female | NH-Black  | 20-35 | 0.00                |
| Female | NH-Black  | 35-44 | 1.20                |
| Female | NH-Black  | 45-54 | 5.30                |
| Female | NH-Black  | 55-64 | 11.20               |
| Female | NH-Black  | 65-74 | 17.40               |
| Female | NH-Black  | 75-84 | 19.80               |
| Female | NH-Black  | 85+   | 21.80               |

Table 12. Coronary heart disease incidence rate (in %).[30,31]

| Year | <35 | 35-39  | 40-44  | 45-49  | 50-54  | 55-59  | 60-64  | 65-69  | 70-74  | 75-79  | 80-84  | 85+    |
|------|-----|--------|--------|--------|--------|--------|--------|--------|--------|--------|--------|--------|
| 2010 | 0.0 | 0.0516 | 0.0516 | 0.2007 | 0.2007 | 0.3519 | 0.3519 | 0.5869 | 0.5869 | 1.4447 | 1.4447 | 3.0621 |
| 2011 | 0.0 | 0.0508 | 0.0508 | 0.1976 | 0.1976 | 0.3466 | 0.3466 | 0.5781 | 0.5781 | 1.4230 | 1.4230 | 3.0162 |
| 2012 | 0.0 | 0.0501 | 0.0501 | 0.1947 | 0.1947 | 0.3414 | 0.3414 | 0.5694 | 0.5694 | 1.4017 | 1.4017 | 2.9709 |
| 2013 | 0.0 | 0.0493 | 0.0493 | 0.1918 | 0.1918 | 0.3363 | 0.3363 | 0.5609 | 0.5609 | 1.3806 | 1.3806 | 2.9263 |
| 2014 | 0.0 | 0.0486 | 0.0486 | 0.1889 | 0.1889 | 0.3312 | 0.3312 | 0.5525 | 0.5525 | 1.3599 | 1.3599 | 2.8825 |
| 2015 | 0.0 | 0.0478 | 0.0478 | 0.1860 | 0.1860 | 0.3262 | 0.3262 | 0.5442 | 0.5442 | 1.3395 | 1.3395 | 2.8392 |
| 2016 | 0.0 | 0.0471 | 0.0471 | 0.1833 | 0.1833 | 0.3214 | 0.3214 | 0.5360 | 0.5360 | 1.3194 | 1.3194 | 2.7966 |
| 2017 | 0.0 | 0.0464 | 0.0464 | 0.1805 | 0.1805 | 0.3165 | 0.3165 | 0.5280 | 0.5280 | 1.2997 | 1.2997 | 2.7547 |
| 2018 | 0.0 | 0.0457 | 0.0457 | 0.1778 | 0.1778 | 0.3118 | 0.3118 | 0.5201 | 0.5201 | 1.2802 | 1.2802 | 2.7134 |
| 2019 | 0.0 | 0.0450 | 0.0450 | 0.1751 | 0.1751 | 0.3071 | 0.3071 | 0.5123 | 0.5123 | 1.2610 | 1.2610 | 2.6727 |
| 2020 | 0.0 | 0.0444 | 0.0444 | 0.1725 | 0.1725 | 0.3025 | 0.3025 | 0.5046 | 0.5046 | 1.2420 | 1.2420 | 2.6326 |
| 2021 | 0.0 | 0.0437 | 0.0437 | 0.1699 | 0.1699 | 0.2980 | 0.2980 | 0.4970 | 0.4970 | 1.2234 | 1.2234 | 2.5931 |
| 2022 | 0.0 | 0.0430 | 0.0430 | 0.1674 | 0.1674 | 0.2935 | 0.2935 | 0.4896 | 0.4896 | 1.2051 | 1.2051 | 2.5542 |
| 2023 | 0.0 | 0.0424 | 0.0424 | 0.1649 | 0.1649 | 0.2891 | 0.2891 | 0.4822 | 0.4822 | 1.1870 | 1.1870 | 2.5159 |
| 2024 | 0.0 | 0.0418 | 0.0418 | 0.1624 | 0.1624 | 0.2848 | 0.2848 | 0.4750 | 0.4750 | 1.1692 | 1.1692 | 2.4781 |
| 2025 | 0.0 | 0.0411 | 0.0411 | 0.1600 | 0.1600 | 0.2805 | 0.2805 | 0.4679 | 0.4679 | 1.1516 | 1.1516 | 2.4410 |
| 2026 | 0.0 | 0.0405 | 0.0405 | 0.1576 | 0.1576 | 0.2763 | 0.2763 | 0.4608 | 0.4608 | 1.1344 | 1.1344 | 2.4043 |
| 2027 | 0.0 | 0.0399 | 0.0399 | 0.1552 | 0.1552 | 0.2721 | 0.2721 | 0.4539 | 0.4539 | 1.1174 | 1.1174 | 2.3683 |
| 2028 | 0.0 | 0.0393 | 0.0393 | 0.1529 | 0.1529 | 0.2681 | 0.2681 | 0.4471 | 0.4471 | 1.1006 | 1.1006 | 2.3328 |
| 2029 | 0.0 | 0.0387 | 0.0387 | 0.1506 | 0.1506 | 0.2640 | 0.2640 | 0.4404 | 0.4404 | 1.0841 | 1.0841 | 2.2978 |
| 2030 | 0.0 | 0.0381 | 0.0381 | 0.1483 | 0.1483 | 0.2601 | 0.2601 | 0.4338 | 0.4338 | 1.0678 | 1.0678 | 2.2633 |
| 2031 | 0.0 | 0.0376 | 0.0376 | 0.1461 | 0.1461 | 0.2562 | 0.2562 | 0.4273 | 0.4273 | 1.0518 | 1.0518 | 2.2293 |
| 2032 | 0.0 | 0.0370 | 0.0370 | 0.1439 | 0.1439 | 0.2523 | 0.2523 | 0.4209 | 0.4209 | 1.0360 | 1.0360 | 2.1959 |
| 2033 | 0.0 | 0.0364 | 0.0364 | 0.1417 | 0.1417 | 0.2485 | 0.2485 | 0.4146 | 0.4146 | 1.0205 | 1.0205 | 2.1630 |
| 2034 | 0.0 | 0.0359 | 0.0359 | 0.1396 | 0.1396 | 0.2448 | 0.2448 | 0.4084 | 0.4084 | 1.0052 | 1.0052 | 2.1305 |
| 2035 | 0.0 | 0.0354 | 0.0354 | 0.1375 | 0.1375 | 0.2411 | 0.2411 | 0.4022 | 0.4022 | 0.9901 | 0.9901 | 2.0986 |

Table 13. Added sugar consumption distributions.[12,13]

| Sex    | Ethnicity          | Consumption group      | % in low vs high risk group |
|--------|--------------------|------------------------|-----------------------------|
| Male   | Hispanic           | Low sugar consumption  | 36.40%                      |
| Male   | Hispanic           | High sugar consumption | 63.60%                      |
| Male   | Non-hispanic White | Low sugar consumption  | 36.40%                      |
| Male   | Non-hispanic White | High sugar consumption | 63.60%                      |
| Male   | Non-hispanic Black | Low sugar consumption  | 34.10%                      |
| Male   | Non-hispanic Black | High sugar consumption | 65.90%                      |
| Female | Hispanic           | Low sugar consumption  | 52.80%                      |
| Female | Hispanic           | High sugar consumption | 47.20%                      |
| Female | Non-hispanic White | Low sugar consumption  | 49.30%                      |
| Female | Non-hispanic White | High sugar consumption | 50.70%                      |
| Female | Non-hispanic Black | Low sugar consumption  | 41.70%                      |
| Female | Non-hispanic Black | High sugar consumption | 58.30%                      |

Table 14. Type 2 diabetes mortality rate.[32-34]

| Age   | Mortality rate |
|-------|----------------|
| 20-24 | 0.006177       |
| 25-29 | 0.009399       |
| 30-34 | 0.009399       |
| 35-39 | 0.009399       |
| 40-44 | 0.009399       |
| 45-49 | 0.013706       |
| 50-54 | 0.013706       |
| 55-59 | 0.020137       |
| 60-64 | 0.020137       |
| 65-69 | 0.031904       |
| 70-74 | 0.031904       |
| 75-79 | 0.068313       |
| 80+   | 0.068313       |

Table 15. Coronary heart disease mortality rate (in %).[30-32]

| Year | <35    | 35-39  | 40-44  | 45-49  | 50-54  | 55-59  | 60-64  | 65-69  | 70-74  | 75-79  | 80-84  | 85+    |
|------|--------|--------|--------|--------|--------|--------|--------|--------|--------|--------|--------|--------|
| 2010 | 0.0000 | 0.5067 | 0.8506 | 0.9493 | 1.3778 | 1.4767 | 1.4179 | 1.1071 | 2.1109 | 2.2865 | 3.9970 | 9.4859 |
| 2011 | 0.0000 | 0.4960 | 0.8327 | 0.9293 | 1.3489 | 1.4457 | 1.3881 | 1.0839 | 2.0665 | 2.2385 | 3.9130 | 9.2867 |
| 2012 | 0.0000 | 0.4856 | 0.8152 | 0.9098 | 1.3205 | 1.4153 | 1.3590 | 1.0611 | 2.0231 | 2.1914 | 3.8309 | 9.0917 |
| 2013 | 0.0000 | 0.4754 | 0.7981 | 0.8907 | 1.2928 | 1.3856 | 1.3304 | 1.0388 | 1.9807 | 2.1454 | 3.7504 | 8.9007 |
| 2014 | 0.0000 | 0.4654 | 0.7813 | 0.8720 | 1.2657 | 1.3565 | 1.3025 | 1.0170 | 1.9391 | 2.1004 | 3.6717 | 8.7138 |
| 2015 | 0.0000 | 0.4557 | 0.7649 | 0.8537 | 1.2391 | 1.3280 | 1.2751 | 0.9956 | 1.8983 | 2.0563 | 3.5946 | 8.5308 |
| 2016 | 0.0000 | 0.4461 | 0.7489 | 0.8358 | 1.2131 | 1.3002 | 1.2484 | 0.9747 | 1.8585 | 2.0131 | 3.5191 | 8.3517 |
| 2017 | 0.0000 | 0.4367 | 0.7331 | 0.8182 | 1.1876 | 1.2728 | 1.2221 | 0.9543 | 1.8195 | 1.9708 | 3.4452 | 8.1763 |
| 2018 | 0.0000 | 0.4275 | 0.7177 | 0.8010 | 1.1626 | 1.2461 | 1.1965 | 0.9342 | 1.7812 | 1.9294 | 3.3728 | 8.0046 |
| 2019 | 0.0000 | 0.4186 | 0.7027 | 0.7842 | 1.1382 | 1.2199 | 1.1714 | 0.9146 | 1.7438 | 1.8889 | 3.3020 | 7.8365 |
| 2020 | 0.0000 | 0.4098 | 0.6879 | 0.7677 | 1.1143 | 1.1943 | 1.1468 | 0.8954 | 1.7072 | 1.8492 | 3.2326 | 7.6719 |
| 2021 | 0.0000 | 0.4012 | 0.6735 | 0.7516 | 1.0909 | 1.1692 | 1.1227 | 0.8766 | 1.6714 | 1.8104 | 3.1648 | 7.5108 |
| 2022 | 0.0000 | 0.3927 | 0.6593 | 0.7358 | 1.0680 | 1.1447 | 1.0991 | 0.8582 | 1.6363 | 1.7724 | 3.0983 | 7.3531 |
| 2023 | 0.0000 | 0.3845 | 0.6455 | 0.7204 | 1.0456 | 1.1207 | 1.0760 | 0.8402 | 1.6019 | 1.7352 | 3.0332 | 7.1987 |
| 2024 | 0.0000 | 0.3764 | 0.6319 | 0.7053 | 1.0236 | 1.0971 | 1.0534 | 0.8225 | 1.5683 | 1.6987 | 2.9695 | 7.0475 |
| 2025 | 0.0000 | 0.3685 | 0.6187 | 0.6905 | 1.0021 | 1.0741 | 1.0313 | 0.8052 | 1.5353 | 1.6631 | 2.9072 | 6.8995 |
| 2026 | 0.0000 | 0.3608 | 0.6057 | 0.6760 | 0.9811 | 1.0515 | 1.0096 | 0.7883 | 1.5031 | 1.6281 | 2.8461 | 6.7546 |
| 2027 | 0.0000 | 0.3532 | 0.5929 | 0.6618 | 0.9605 | 1.0294 | 0.9884 | 0.7718 | 1.4715 | 1.5939 | 2.7864 | 6.6128 |
| 2028 | 0.0000 | 0.3458 | 0.5805 | 0.6479 | 0.9403 | 1.0078 | 0.9677 | 0.7556 | 1.4406 | 1.5605 | 2.7278 | 6.4739 |
| 2029 | 0.0000 | 0.3385 | 0.5683 | 0.6343 | 0.9206 | 0.9867 | 0.9474 | 0.7397 | 1.4104 | 1.5277 | 2.6706 | 6.3380 |
| 2030 | 0.0000 | 0.3314 | 0.5564 | 0.6209 | 0.9012 | 0.9659 | 0.9275 | 0.7242 | 1.3808 | 1.4956 | 2.6145 | 6.2049 |
| 2031 | 0.0000 | 0.3245 | 0.5447 | 0.6079 | 0.8823 | 0.9457 | 0.9080 | 0.7090 | 1.3518 | 1.4642 | 2.5596 | 6.0746 |
| 2032 | 0.0000 | 0.3176 | 0.5332 | 0.5951 | 0.8638 | 0.9258 | 0.8889 | 0.6941 | 1.3234 | 1.4335 | 2.5058 | 5.9470 |
| 2033 | 0.0000 | 0.3110 | 0.5220 | 0.5826 | 0.8456 | 0.9064 | 0.8703 | 0.6795 | 1.2956 | 1.4034 | 2.4532 | 5.8221 |
| 2034 | 0.0000 | 0.3044 | 0.5111 | 0.5704 | 0.8279 | 0.8873 | 0.8520 | 0.6652 | 1.2684 | 1.3739 | 2.4017 | 5.6998 |
| 2035 | 0.0000 | 0.2981 | 0.5004 | 0.5584 | 0.8105 | 0.8687 | 0.8341 | 0.6513 | 1.2417 | 1.3450 | 2.3513 | 5.5801 |

Table 16. Non-disease related mortality rate (in %).[32]

| Year | 20-24 | 25-29 | 30-34 | 35-39 | 40-44 | 45-49 | 50-54 | 55-59 | 60-64 | 65-69 | 70-74 | 75-79 | 80-84 | 85+    |
|------|-------|-------|-------|-------|-------|-------|-------|-------|-------|-------|-------|-------|-------|--------|
| 2010 | 0.086 | 0.093 | 0.105 | 0.128 | 0.178 | 0.275 | 0.411 | 0.583 | 0.822 | 1.242 | 1.909 | 3.038 | 4.952 | 11.162 |
| 2011 | 0.086 | 0.093 | 0.105 | 0.125 | 0.174 | 0.269 | 0.403 | 0.571 | 0.797 | 1.205 | 1.851 | 2.947 | 4.804 | 10.828 |
| 2012 | 0.086 | 0.093 | 0.105 | 0.123 | 0.171 | 0.264 | 0.395 | 0.560 | 0.773 | 1.169 | 1.796 | 2.859 | 4.660 | 10.503 |
| 2013 | 0.086 | 0.093 | 0.105 | 0.120 | 0.167 | 0.259 | 0.387 | 0.548 | 0.750 | 1.133 | 1.742 | 2.773 | 4.520 | 10.188 |
| 2014 | 0.086 | 0.093 | 0.105 | 0.118 | 0.164 | 0.253 | 0.379 | 0.537 | 0.728 | 1.099 | 1.690 | 2.690 | 4.384 | 9.882  |
| 2015 | 0.086 | 0.093 | 0.105 | 0.115 | 0.161 | 0.248 | 0.372 | 0.527 | 0.706 | 1.066 | 1.639 | 2.609 | 4.253 | 9.586  |
| 2016 | 0.086 | 0.093 | 0.105 | 0.113 | 0.158 | 0.243 | 0.364 | 0.516 | 0.685 | 1.034 | 1.590 | 2.531 | 4.125 | 9.298  |
| 2017 | 0.086 | 0.093 | 0.105 | 0.111 | 0.154 | 0.239 | 0.357 | 0.506 | 0.664 | 1.003 | 1.542 | 2.455 | 4.002 | 9.019  |
| 2018 | 0.086 | 0.093 | 0.105 | 0.109 | 0.151 | 0.234 | 0.350 | 0.496 | 0.644 | 0.973 | 1.496 | 2.381 | 3.881 | 8.749  |
| 2019 | 0.086 | 0.093 | 0.105 | 0.106 | 0.148 | 0.229 | 0.343 | 0.486 | 0.625 | 0.944 | 1.451 | 2.310 | 3.765 | 8.486  |
| 2020 | 0.086 | 0.093 | 0.105 | 0.104 | 0.145 | 0.225 | 0.336 | 0.476 | 0.606 | 0.916 | 1.408 | 2.241 | 3.652 | 8.231  |
| 2021 | 0.086 | 0.093 | 0.105 | 0.102 | 0.142 | 0.220 | 0.329 | 0.467 | 0.588 | 0.888 | 1.365 | 2.173 | 3.543 | 7.985  |
| 2022 | 0.086 | 0.093 | 0.105 | 0.100 | 0.140 | 0.216 | 0.323 | 0.457 | 0.570 | 0.862 | 1.324 | 2.108 | 3.436 | 7.745  |
| 2023 | 0.086 | 0.093 | 0.105 | 0.098 | 0.137 | 0.211 | 0.316 | 0.448 | 0.553 | 0.836 | 1.285 | 2.045 | 3.333 | 7.513  |
| 2024 | 0.086 | 0.093 | 0.105 | 0.096 | 0.134 | 0.207 | 0.310 | 0.439 | 0.537 | 0.811 | 1.246 | 1.984 | 3.233 | 7.287  |
| 2025 | 0.086 | 0.093 | 0.105 | 0.094 | 0.131 | 0.203 | 0.304 | 0.430 | 0.521 | 0.786 | 1.209 | 1.924 | 3.136 | 7.069  |
| 2026 | 0.086 | 0.093 | 0.105 | 0.092 | 0.129 | 0.199 | 0.298 | 0.422 | 0.505 | 0.763 | 1.172 | 1.866 | 3.042 | 6.857  |
| 2027 | 0.086 | 0.093 | 0.105 | 0.090 | 0.126 | 0.195 | 0.292 | 0.413 | 0.490 | 0.740 | 1.137 | 1.810 | 2.951 | 6.651  |
| 2028 | 0.086 | 0.093 | 0.105 | 0.089 | 0.124 | 0.191 | 0.286 | 0.405 | 0.475 | 0.718 | 1.103 | 1.756 | 2.862 | 6.451  |
| 2029 | 0.086 | 0.093 | 0.105 | 0.087 | 0.121 | 0.187 | 0.280 | 0.397 | 0.461 | 0.696 | 1.070 | 1.703 | 2.776 | 6.258  |
| 2030 | 0.086 | 0.093 | 0.105 | 0.085 | 0.119 | 0.183 | 0.275 | 0.389 | 0.447 | 0.675 | 1.038 | 1.652 | 2.693 | 6.070  |
| 2031 | 0.086 | 0.093 | 0.105 | 0.083 | 0.116 | 0.180 | 0.269 | 0.381 | 0.434 | 0.655 | 1.007 | 1.603 | 2.612 | 5.888  |
| 2032 | 0.086 | 0.093 | 0.105 | 0.082 | 0.114 | 0.176 | 0.264 | 0.374 | 0.421 | 0.635 | 0.977 | 1.555 | 2.534 | 5.711  |
| 2033 | 0.086 | 0.093 | 0.105 | 0.080 | 0.112 | 0.173 | 0.258 | 0.366 | 0.408 | 0.616 | 0.947 | 1.508 | 2.458 | 5.540  |
| 2034 | 0.086 | 0.093 | 0.105 | 0.079 | 0.110 | 0.169 | 0.253 | 0.359 | 0.396 | 0.598 | 0.919 | 1.463 | 2.384 | 5.374  |
| 2035 | 0.086 | 0.093 | 0.105 | 0.077 | 0.107 | 0.166 | 0.248 | 0.352 | 0.384 | 0.580 | 0.891 | 1.419 | 2.313 | 5.213  |

Table 17. IHME health-adjusted life expectancy and discounted life expectancy for females. [94,95]

| Age of death | WHO HALE | Discounted by 3% | Age of death | WHO HALE | Discounted by 3% |
|--------------|----------|------------------|--------------|----------|------------------|
| 20           | 51.138   | 25.981           | 66           | 15.167   | 12.042           |
| 21           | 51.138   | 25.981           | 67           | 15.167   | 12.042           |
| 22           | 51.138   | 25.981           | 68           | 15.167   | 12.042           |
| 23           | 51.138   | 25.981           | 69           | 15.167   | 12.042           |
| 24           | 51.138   | 25.981           | 70           | 12.020   | 9.968            |
| 25           | 46.766   | 24.966           | 71           | 12.020   | 9.968            |
| 26           | 46.766   | 24.966           | 72           | 12.020   | 9.968            |
| 27           | 46.766   | 24.966           | 73           | 12.020   | 9.968            |
| 28           | 46.766   | 24.966           | 74           | 12.020   | 9.968            |
| 29           | 46.766   | 24.966           | 75           | 9.169    | 7.912            |
| 30           | 42.466   | 23.832           | 76           | 9.169    | 7.912            |
| 31           | 42.466   | 23.832           | 77           | 9.169    | 7.912            |
| 32           | 42.466   | 23.832           | 78           | 9.169    | 7.912            |
| 33           | 42.466   | 23.832           | 79           | 9.169    | 7.912            |
| 34           | 42.466   | 23.832           | 80           | 6.646    | 5.942            |
| 35           | 38.214   | 22.560           | 81           | 6.646    | 5.942            |
| 36           | 38.214   | 22.560           | 82           | 6.646    | 5.942            |
| 37           | 38.214   | 22.560           | 83           | 6.646    | 5.942            |
| 38           | 38.214   | 22.560           | 84           | 6.646    | 5.942            |
| 39           | 38.214   | 22.560           | 85           | 4.512    | 4.159            |
| 40           | 34.033   | 21.144           | 86           | 4.512    | 4.159            |
| 41           | 34.033   | 21.144           | 87           | 4.512    | 4.159            |
| 42           | 34.033   | 21.144           | 88           | 4.512    | 4.159            |
| 43           | 34.033   | 21.144           | 89           | 4.512    | 4.159            |
| 44           | 34.033   | 21.144           | 90           | 2.915    | 2.751            |
| 45           | 29.960   | 19.584           | 91           | 2.915    | 2.751            |
| 46           | 29.960   | 19.584           | 92           | 2.915    | 2.751            |
| 47           | 29.960   | 19.584           | 93           | 2.915    | 2.751            |
| 48           | 29.960   | 19.584           | 94           | 2.915    | 2.751            |
| 49           | 29.960   | 19.584           | 95           | 1.868    | 1.789            |
| 50           | 26.017   | 17.884           | 96           | 1.868    | 1.789            |
| 51           | 26.017   | 17.884           | 97           | 1.868    | 1.789            |
| 52           | 26.017   | 17.884           | 98           | 1.868    | 1.789            |
| 53           | 26.017   | 17.884           | 99           | 1.868    | 1.789            |
| 54           | 26.017   | 17.884           | 100          | 1.231    | 1.189            |
| 55           | 22.214   | 16.045           | 101          | 1.231    | 1.189            |
| 56           | 22.214   | 16.045           | 102          | 1.231    | 1.189            |
| 57           | 22.214   | 16.045           | 103          | 1.231    | 1.189            |
| 58           | 22.214   | 16.045           | 104          | 1.231    | 1.189            |
| 59           | 22.214   | 16.045           | 105          | 1.000    | 0.971            |
| 60           | 18.574   | 14.081           | 106          | 1.000    | 0.971            |
| 61           | 18.574   | 14.081           | 107          | 1.000    | 0.971            |
| 62           | 18.574   | 14.081           | 108          | 1.000    | 0.971            |
| 63           | 18.574   | 14.081           | 109          | 1.000    | 0.971            |
| 64           | 18.574   | 14.081           | 110          | 1.000    | 0.971            |
| 65           | 15.167   | 12.042           |              |          |                  |

Table 18. IHME health-adjusted life expectancy and discounted life expectancy for males.[94,95]

| Age of death | WHO HALE | Discounted by 3% | Age of death | WHO HALE | Discounted by 3% |
|--------------|----------|------------------|--------------|----------|------------------|
| 20           | 48.035   | 25.275           | 66           | 13.080   | 10.688           |
| 21           | 48.035   | 25.275           | 67           | 13.080   | 10.688           |
| 22           | 48.035   | 25.275           | 68           | 13.080   | 10.688           |
| 23           | 48.035   | 25.275           | 69           | 13.080   | 10.688           |
| 24           | 48.035   | 25.275           | 70           | 10.208   | 8.680            |
| 25           | 43.802   | 24.200           | 71           | 10.208   | 8.680            |
| 26           | 43.802   | 24.200           | 72           | 10.208   | 8.680            |
| 27           | 43.802   | 24.200           | 73           | 10.208   | 8.680            |
| 28           | 43.802   | 24.200           | 74           | 10.208   | 8.680            |
| 29           | 43.802   | 24.200           | 75           | 7.680    | 6.767            |
| 30           | 39.589   | 22.989           | 76           | 7.680    | 6.767            |
| 31           | 39.589   | 22.989           | 77           | 7.680    | 6.767            |
| 32           | 39.589   | 22.989           | 78           | 7.680    | 6.767            |
| 33           | 39.589   | 22.989           | 79           | 7.680    | 6.767            |
| 34           | 39.589   | 22.989           | 80           | 5.524    | 5.019            |
| 35           | 35.374   | 21.616           | 81           | 5.524    | 5.019            |
| 36           | 35.374   | 21.616           | 82           | 5.524    | 5.019            |
| 37           | 35.374   | 21.616           | 83           | 5.524    | 5.019            |
| 38           | 35.374   | 21.616           | 84           | 5.524    | 5.019            |
| 39           | 35.374   | 21.616           | 85           | 3.723    | 3.471            |
| 40           | 31.217   | 20.085           | 86           | 3.723    | 3.471            |
| 41           | 31.217   | 20.085           | 87           | 3.723    | 3.471            |
| 42           | 31.217   | 20.085           | 88           | 3.723    | 3.471            |
| 43           | 31.217   | 20.085           | 89           | 3.723    | 3.471            |
| 44           | 31.217   | 20.085           | 90           | 2.388    | 2.269            |
| 45           | 27.195   | 18.412           | 91           | 2.388    | 2.269            |
| 46           | 27.195   | 18.412           | 92           | 2.388    | 2.269            |
| 47           | 27.195   | 18.412           | 93           | 2.388    | 2.269            |
| 48           | 27.195   | 18.412           | 94           | 2.388    | 2.269            |
| 49           | 27.195   | 18.412           | 95           | 1.521    | 1.462            |
| 50           | 23.347   | 16.614           | 96           | 1.521    | 1.462            |
| 51           | 23.347   | 16.614           | 97           | 1.521    | 1.462            |
| 52           | 23.347   | 16.614           | 98           | 1.521    | 1.462            |
| 53           | 23.347   | 16.614           | 99           | 1.521    | 1.462            |
| 54           | 23.347   | 16.614           | 100          | 1.000    | 0.971            |
| 55           | 19.705   | 14.714           | 101          | 1.000    | 0.971            |
| 56           | 19.705   | 14.714           | 102          | 1.000    | 0.971            |
| 57           | 19.705   | 14.714           | 103          | 1.000    | 0.971            |
| 58           | 19.705   | 14.714           | 104          | 1.000    | 0.971            |
| 59           | 19.705   | 14.714           | 105          | 1.000    | 0.971            |
| 60           | 16.256   | 12.716           | 106          | 1.000    | 0.971            |
| 61           | 16.256   | 12.716           | 107          | 1.000    | 0.971            |
| 62           | 16.256   | 12.716           | 108          | 1.000    | 0.971            |
| 63           | 16.256   | 12.716           | 109          | 1.000    | 0.971            |
| 64           | 16.256   | 12.716           | 110          | 1.000    | 0.971            |
| 65           | 13.080   | 10.688           |              |          |                  |

## References

1. U.S. Census Bureau, Population Division. Population Estimates. Accessed on <http://www.census.gov/popest/index.html> at Apr 23, 2015.
2. Browning JD, Szczepaniak LS, Dobbins R, Nuremberg P, Horton JD, Cohen JC, et al. Prevalence of hepatic steatosis in an urban population in the United States: impact of ethnicity. *Hepatology*. 2004 Dec;40(6):1387-95.
3. Mahady SE, George J. Management of nonalcoholic steatohepatitis: an evidence-based approach. *Clin Liver Dis*. 2012 Aug;16(3):631-45. doi: 10.1016/j.cld.2012.05.003.
4. Williams CD, Stengel J, Asike MI, Torres DM, Shaw J, Contreras M, et al. Prevalence of non-alcoholic fatty liver disease and nonalcoholic steatohepatitis among a largely middle-aged population utilizing ultrasound and liver biopsy: a prospective study. *Gastroenterology*. 2011 Jan;140(1):124-31. doi: 10.1053/j.gastro.2010.09.038.
5. Chalasani N(1), Younossi Z, Lavine JE, Diehl AM, Brunt EM, Cusi K, et al. The diagnosis and management of non-alcoholic fatty liver disease: practice guideline by the American Gastroenterological Association, American Association for the Study of Liver Diseases, and American College of Gastroenterology. *Gastroenterology*. 2012 Jun;142(7):1592-609. doi: 10.1053/j.gastro.2012.04.001.
6. Adams LA, Lymp JF, St Sauver J, Sanderson SO, Lindor KD, Feldstein A, et al. The natural history of nonalcoholic fatty liver disease: a population-based cohort study. *Gastroenterology*. 2005 Jul;129(1):113-21.
7. Ascha MS, Hanouneh IA, Lopez R, Tamimi TA, Feldstein AF, Zein NN. The incidence and risk factors of hepatocellular carcinoma in patients with nonalcoholic steatohepatitis. *Hepatology*. 2010 Jun;51(6):1972-8. doi: 10.1002/hep.23527.
8. Bambha K, Belt P, Abraham M, Wilson LA, Pabst M, Ferrell L, et al; Nonalcoholic Steatohepatitis Clinical Research Network Research Group. Ethnicity and nonalcoholic fatty liver disease. *Hepatology*. 2012 Mar;55(3):769-80. doi: 10.1002/hep.24726.
9. Michelotti GA, Machado MV, Diehl AM. NAFLD, NASH and liver cancer. *Nat Rev Gastroenterol Hepatol*. 2013 Nov;10(11):656-65. doi: 10.1038/nrgastro.2013.183.
10. Page JM, Harrison SA. NASH and HCC. *Clin Liver Dis*. 2009 Nov;13(4):631-47. doi: 10.1016/j.cld.2009.07.007.
11. Centers for Disease Control and Prevention. National Center for Health Statistics. Health Data Interactive. Accessed at [www.cdc.gov/nchs/hdi.htm](http://www.cdc.gov/nchs/hdi.htm) on Apr 23, 2015.
12. Centers for Disease Control and Prevention. National Center for Health Statistics. National Health and Nutrition Examination Survey Data. Hyattsville, MD: U.S. Department of Health and Human Services, Centers for Disease Control and Prevention. 2005-2012. <http://www.cdc.gov/nchs/nhanes.htm>.
13. Rodríguez LA, Madsen KA, Auinger P, Bremer AA, Lustig RH. Added sugar intake and metabolic syndrome risk in US adolescents: cross-sectional analysis of NHANES 2005-2012. *Journal for Public Health Nutrition*. 2015. [Currently under review].
14. Anstee QM, Targher G, Day CP. Progression of NAFLD to diabetes mellitus, cardiovascular disease or cirrhosis. *Nat Rev Gastroenterol Hepatol*. 2013 Jun;10(6):330-44. doi: 10.1038/nrgastro.2013.41.
15. Bruno S, Maisonneuve P, Castellana P, Rotmensz N, Rossi S, Maggioni M, et al. Incidence and risk factors for non-alcoholic steatohepatitis: prospective study of 5408 women enrolled in Italian tamoxifen chemoprevention trial. *BMJ*. 2005 Apr 23;330(7497):932.
16. Ekstedt M, Franzén LE, Mathiesen UL, Thorelius L, Holmqvist M, Bodemar G, et al. Long-term follow-up of patients with NAFLD and elevated liver enzymes. *Hepatology*. 2006 Oct;44(4):865-73.
17. Haukeland JW, Lorgen I, Schreiner LT, Frigstad SO, Brandsaeter B, Bjørø K, et al. Incidence rates and causes of cirrhosis in a Norwegian population. *Scand J Gastroenterol*. 2007 Dec;42(12):1501-8.
18. Musso G, Cassader M, Bo S, De Michieli F, Gambino R. Sterol regulatory element-binding factor 2 (SREBF-2) predicts 7-year NAFLD incidence and severity of liverdisease and lipoprotein and glucose dysmetabolism. *Diabetes*. 2013 Apr;62(4):1109-20. doi: 10.2337/db12-0858.
19. Omagari K, Kadokawa Y, Masuda J, Egawa I, Sawa T, Hazama H, et al. Fatty liver in non-alcoholic non-overweight Japanese adults: incidence and clinical characteristics. *J Gastroenterol Hepatol*. 2002 Oct;17(10):1098-105.
20. Rafiq N, Bai C, Fang Y, Srishord M, McCullough A, Gramlich T, et al. Long-term follow-up of patients with nonalcoholic fatty liver. *Clin Gastroenterol Hepatol*. 2009 Feb;7(2):234-8. doi: 10.1016/j.cgh.2008.11.005.
21. Wong VW, Wong GL, Yeung DK, Lau TK, Chan CK, Chim AM, et al. Incidence of non-alcoholic fatty liver disease in Hong Kong: a population study with paired proton-magnetic resonance spectroscopy. *J Hepatol*. 2015 Jan;62(1):182-9. doi: 10.1016/j.jhep.2014.08.041.
22. Zelber-Sagi S1, Lotan R, Shlomai A, Webb M, Harrari G, Buch A, et al. Predictors for incidence and remission of NAFLD in the general population during a seven-year prospective follow-up. *J Hepatol*. 2012 May;56(5):1145-51. doi: 10.1016/j.jhep.2011.12.011.
23. Kawamura Y, Arase Y, Ikeda K, Seko Y, Imai N, Hosaka T, et al. Large-scale long-term follow-up study of Japanese patients with non-alcoholic Fatty liver disease for the onset of hepatocellular carcinoma. *Am J Gastroenterol*. 2012 Feb;107(2):253-61. doi: 10.1038/ajg.2011.327.
24. Njei B, Rotman Y, Ditah I, Lim JK. Emerging trends in hepatocellular carcinoma incidence and mortality. *Hepatology*. 2015 Jan;61(1):191-9. doi: 10.1002/hep.27388.
25. El-Serag HB, Mason AC. Rising incidence of hepatocellular carcinoma in the United States. *N Engl J Med*. 1999 Mar 11;340(10):745-50.
26. Lazo M, Hernaes R, Bonekamp S, Kamel IR, Brancati FL, Gualler E, et al. Non-alcoholic fatty liver disease and mortality among US adults: prospective cohort study. *BMJ*. 2011 Nov 18;343:d6891. doi: 10.1136/bmj.d6891.
27. Stepanova M, Rafiq N, Makhlof H, Agrawal R, Kaur I, Younoszai Z, et al. Predictors of all-cause mortality and liver-related mortality in patients with non-alcoholic fatty liver disease (NAFLD). *Dig Dis Sci*. 2013 Oct;58(10):3017-23. doi: 10.1007/s10620-013-2743-5.
28. Söderberg C, Stål P, Asklung J, Glaumann H, Lindberg G, Marmur J, et al. Decreased survival of subjects with elevated liver function tests during a 28-year follow-up. *Hepatology*. 2010 Feb;51(2):595-602. doi: 10.1002/hep.23314.
29. Hafliadottir S, Jonasson JG, Norland H, Einarsdottir SO, Kleiner DE, Lund SH. Long-term follow-up and liver-related death rate in patients with non-alcoholic and alcoholic related fatty liverdisease. *BMC Gastroenterol*. 2014 Sep 27;14:166. doi: 10.1186/1471-230X-14-166.
30. National Heart, Lung, and Blood Institute . *Morbidity & Mortality: 2012 Chart Book on Cardiovascular, Lung, and Blood Diseases*. National Institutes of Health. National Heart, Lung, and Blood Institute. 2012.
31. National Heart, Lung, and Blood Institute . *Incidence and Prevalence: 2006 Chart Book on Cardiovascular and Lung Diseases*. National Institutes of Health. National Heart, Lung, and Blood Institute. 2006.
32. Centers for Disease Control and Prevention. National Center for Health Statistics. Underlying Cause of Death 1999-2013 on CDC WONDER Online

- Database, released 2015. Data are from the Multiple Cause of Death Files, 1999-2013, as compiled from data provided by the 57 vital statistics jurisdictions through the Vital Statistics Cooperative Program. Accessed at <http://wonder.cdc.gov/ucd-icd10.html> on Apr 16, 2015.
33. Geiss LS, Wang J, Cheng YJ, Thompson TJ, Barker L, Li Y, et al. Prevalence and incidence trends for diagnosed diabetes among adults aged 20 to 79 years, United States, 1980-2012. *JAMA*. 2014 Sep 24;312(12):1218-26. doi: 10.1001/jama.2014.11494.
  34. Fishman EI, Stokes A, Preston SH. The dynamics of diabetes among birth cohorts in the U.S. *Diabetes Care*. 2014 Apr;37(4):1052-9. doi: 10.2337/dc13-1982.
  35. Daouli J, Davillas A, Demoussis M, Giannakopoulos N. Obesity persistence and duration dependence: evidence from a cohort of US adults (1985-2010). *Econ Hum Biol*. 2014 Jan;12:30-44. doi: 10.1016/j.ehb.2013.07.002.
  36. Gordon-Larsen P, Adair LS, Nelson MC, Popkin BM. Five-year obesity incidence in the transition period between adolescence and adulthood: the National Longitudinal Study of Adolescent Health. *Am J Clin Nutr*. 2004 Sep;80(3):569-75.
  37. Parikh NI, Pencina MJ, Wang TJ, Lanier KJ, Fox CS, D'Agostino RB, et al. Increasing trends in incidence of overweight and obesity over 5 decades. *Am J Med*. 2007 Mar;120(3):242-50.
  38. Williamson DF, Kahn HS, Byers T. The 10-y incidence of obesity and major weight gain in black and white US women aged 30-55 y. *Am J Clin Nutr*. 1991 Jun;53(6 Suppl):1515S-1518S.
  39. Schneider ALC, Lazo M, Selvin E, Clark JM. Racial differences in nonalcoholic fatty liver disease in the U.S. population. *Obesity (Silver Spring)*. 2014;22(1):292-299. doi:10.1002/oby.20426.
  40. Kelishadi R, Cook SR, Adibi A, Faghihimani Z, Ghatrehsamani S, Beihaghi A, et al. Association of the components of the metabolic syndrome with non-alcoholic fatty liver disease among normal-weight, overweight and obese children and adolescents. *Diabetol Metab Syndr*. 2009 Dec 22;1:29. doi: 10.1186/1758-5996-1-29.
  41. Peng L, Wang J, Li F. Weight reduction for non-alcoholic fatty liver disease. *Cochrane Database Syst Rev*. 2011 Jun 15;(6):CD003619. doi: 10.1002/14651858.CD003619.pub3.
  42. Dassanayake AS, Kasturiratne A, Rajindrajith S, Kalubowila U, Chakravarthi S, De Silva AP, et al. Prevalence and risk factors for non-alcoholic fatty liver disease among adults in an urban Sri Lankan population. *J Gastroenterol Hepatol*. 2009 Jul;24(7):1284-8. doi: 10.1111/j.1440-1746.2009.05831.x.
  43. Lee K, Sung JA, Kim JS, Park TJ. The roles of obesity and gender on the relationship between metabolic risk factors and non-alcoholic fatty liver disease in Koreans. *Diabetes Metab Res Rev*. 2009 Feb;25(2):150-5. doi: 10.1002/dmrr.924.
  44. Zeb I, Katz R, Nasir K, Ding J, Rezaeian P, Budoff MJ. Relation of nonalcoholic fatty liver disease to the metabolic syndrome: the Multi-Ethnic Study of Atherosclerosis. *J Cardiovasc Comput Tomogr*. 2013 Sep-Oct;7(5):311-8. doi: 10.1016/j.jcct.2013.08.011.
  45. Chan WK, Tan AT, Vethakkan SR, Tah PC, Vijayanathan A, Goh KL. Non-alcoholic fatty liver disease in diabetics - prevalence and predictive factors in a multiracial hospital clinic population in Malaysia. *J Gastroenterol Hepatol*. 2013 Aug;28(8):1375-83. doi: 10.1111/jgh.12204.
  46. Papandreou D, Karabouta Z, Pantoleon A, Rousso I. Investigation of anthropometric, biochemical and dietary parameters of obese children with and without non-alcoholic fatty liver disease. *Appetite*. 2012 Dec;59(3):939-44. doi: 10.1016/j.appet.2012.09.006.
  47. Abid A, Taha O, Nseir W, Farah R, Grosovski M, Assy N. Soft drink consumption is associated with fatty liver disease independent of metabolic syndrome. *J Hepatol*. 2009 Nov;51(5):918-24. doi: 10.1016/j.jhep.2009.05.033.
  48. Wong VW, Wong GL, Yip GW, Lo AO, Limquiaco J, Chu WC, et al. Coronary artery disease and cardiovascular outcomes in patients with non-alcoholic fatty liver disease. *Gut*. 2011 Dec;60(12):1721-7. doi: 10.1136/gut.2011.242016.
  49. Hamaguchi M, Kojima T, Takeda N, Nagata C, Takeda J, Sarui H, et al. Nonalcoholic fatty liver disease is a novel predictor of cardiovascular disease. *World J Gastroenterol*. 2007 Mar 14;13(10):1579-84.
  50. Fan JG, Li F, Cai XB, Peng YD, Ao QH, Gao Y. Effects of nonalcoholic fatty liver disease on the development of metabolic disorders. *J Gastroenterol Hepatol*. 22, 1086-1091 (2007).
  51. Targher G, Bertolini L, Rodella S, Tessari R, Zenari L, Lippi G, et al. Nonalcoholic fatty liver disease is independently associated with an increased incidence of cardiovascular events in type 2 diabetic patients. *Diabetes Care* 30, 2119-2121 (2007).
  52. Treeprasertsuk S, Leverage S, Adams LA, Lindor KD, St Sauver J, Angulo P. The Framingham risk score and heart disease in nonalcoholic fatty liver disease. *Liver Int*. 32, 945-950 (2012).
  53. Canoy D, Cairns BJ, Balkwill A, Wright FL, Green J, Reeves G, et al. Body mass index and incident coronary heart disease in women: a population-based prospective study. *BMC Med*. 2013 Apr 2;11:87. doi: 10.1186/1741-7015-11-87.
  54. Global Burden of Metabolic Risk Factors for Chronic Diseases Collaboration (BMI Mediated Effects), Lu Y, Hajifathalian K, Ezzati M, Woodward M, Rimm EB, Danaei G. Metabolic mediators of the effects of body-mass index, overweight, and obesity on coronary heart disease and stroke: a pooled analysis of 97 prospective cohorts with 1.8 million participants. *Lancet*. 2014 Mar 15;383(9921):970-83. doi: 10.1016/S0140-6736(13)61836-X.
  55. Gruson E, Montaye M, Kee F, Wagner A, Bingham A, Ruidavets JB, et al. Anthropometric assessment of abdominal obesity and coronary heart disease risk in men: the PRIME study. *Heart*. 2010 Jan;96(2):136-40. doi: 10.1136/hrt.2009.171447.
  56. de Hollander EL, Bogers RP, Boshuizen HC, Rosengren A, Shipley MJ, Knekt P, et al. Influence of calendar period on the association between BMI and coronary heart disease: a meta-analysis of 31 cohorts. *Obesity (Silver Spring)*. 2013 May;21(5):865-80. doi: 10.1002/oby.20043.
  57. Labounty TM, Gomez MJ, Achenbach S, Al-Mallah M, Berman DS, Budoff MJ, et al. Body mass index and the prevalence, severity, and risk of coronary artery disease: an international multicentre study of 13,874 patients. *Eur Heart J Cardiovasc Imaging*. 2013 May;14(5):456-63. doi: 10.1093/ehjci/jes179.
  58. Mongraw-Chaffin ML, Peters SA, Huxley RR, Woodward M. The sex-specific association between BMI and coronary heart disease: a systematic review and meta-analysis of 95 cohorts with 1.2 million participants. *Lancet Diabetes Endocrinol*. 2015 Jun;3(6):437-49. doi: 10.1016/S2213-8587(15)00086-8.
  59. Park YS, Kim JS. Obesity phenotype and coronary heart disease risk as estimated by the Framingham risk score. *J Korean Med Sci*. 2012 Mar;27(3):243-9. doi: 10.3346/jkms.2012.27.3.243.
  60. Taylor AE, Ebrahim S, Ben-Shlomo Y, Martin RM, Whincup PH, Yarnell JW, et al. Comparison of the associations of body mass index and measures of central adiposity and fat mass with coronary heart disease, diabetes, and all-cause mortality: a study using data from 4 UK cohorts. *Am J Clin Nutr*. 2010 Mar;91(3):547-56. doi: 10.3945/ajcn.2009.28757.
  61. Peters SA, Huxley RR, Woodward M. Diabetes as risk factor for incident coronary heart disease in women compared with men: a systematic review and meta-analysis of 64 cohorts including 858,507 individuals and 28,203 coronary events. *Diabetologia*.

- 2014 Aug;57(8):1542-51. doi: 10.1007/s00125-014-3260-6.
62. Shibata M, Kihara Y, Taguchi M, Tashiro M, Otsuki M. Nonalcoholic fatty liver disease is a risk factor for type 2 diabetes in middle-aged Japanese men. *Diabetes Care* 30, 2940–2944 (2007).
  63. Kim CH, Park JY, Lee KU, Kim JH, Kim HK. Fatty liver is an independent risk factor for the development of Type 2 diabetes in Korean adults. *Diabet. Med.* 25, 476–481 (2008).
  64. Yamada T, Fukatsu M, Suzuki S, Wada T, Yoshida T, Joh T. Fatty liver predicts impaired fasting glucose and type 2 diabetes mellitus in Japanese undergoing a health checkup. *J. Gastroenterol. Hepatol.* 25, 352–356 (2010).
  65. Sung KC, Kim SH. Interrelationship between fatty liver and insulin resistance in the development of type 2 diabetes. *J. Clin. Endocrinol. Metab.* 96, 1093–1097 (2011).
  66. Bae JC, Rhee EJ, Lee WY, Park SE, Park CY, Oh KW, et al. Combined effect of nonalcoholic fatty liver disease and impaired fasting glucose on the development of type 2 diabetes: a 4 year retrospective longitudinal study. *Diabetes Care* 34, 727–729 (2011).
  67. Sung KC, Jeong WS, Wild SH, Byrne CD. Combined influence of insulin resistance, overweight/obesity, and fatty liver as risk factors for type 2 diabetes. *Diabetes Care* 35, 717–722 (2012).
  68. Kasturiratne A, Weerasinghe S, Dassanayake AS, Rajindrajith S, de Silva AP, Kato N, et al. Influence of non-alcoholic fatty liver disease on the development of diabetes mellitus. *J Gastroenterol Hepatol.* 2013 Jan;28(1):142-7. doi: 10.1111/j.1440-1746.2012.07264.x.
  69. Abdullah A, Peeters A, de Courten M, Stoelwinder J. The magnitude of association between overweight and obesity and the risk of diabetes: a meta-analysis of prospective cohort studies. *Diabetes Res Clin Pract.* 2010 Sep;89(3):309-19. doi: 10.1016/j.diabres.2010.04.012.
  70. Nyamdorj R, Qiao Q, Söderberg S, Pitkaniemi JM, Zimmet PZ, Shaw JE, et al. BMI compared with central obesity indicators as a predictor of diabetes incidence in Mauritius. *Obesity (Silver Spring)*. 2009 Feb;17(2):342-8. doi: 10.1038/oby.2008.503.
  71. Rolando L, Byrne DW, McGown PW, Goetzl RZ, Elasy TA, Yarbrough MI. Health risk factor modification predicts incidence of diabetes in an employee population: results of an 8-year longitudinal cohort study. *J Occup Environ Med.* 2013 Apr;55(4):410-5. doi: 10.1097/JOM.0b013e31827cbaec.
  72. Rodbard HW, Bays HE, Gavin JR 3rd, Green AJ, Bazata DD, Lewis SJ, et al. Rate and risk predictors for development of self-reported type-2 diabetes mellitus over a 5-year period: the SHIELD study. *Int J Clin Pract.* 2012 Jul;66(7):684-91. doi: 10.1111/j.1742-1241.2012.02952.x.
  73. Kodama S, Horikawa C, Fujihara K, Yoshizawa S, Yachi Y, Tanaka S, Quantitative relationship between body weight gain in adulthood and incident type 2 diabetes: a meta-analysis. *Obes Rev.* 2014 Mar;15(3):202-14. doi: 10.1111/obr.12129.
  74. Bell JA, Kivimaki M, Hamer M. Metabolically healthy obesity and risk of incident type 2 diabetes: a meta-analysis of prospective cohort studies. *Obes Rev.* 2014 Jun;15(6):504-15. doi: 10.1111/obr.12157.
  75. Guh DP, Zhang W, Bansback N, Amarsi Z, Birmingham CL, Anis AH. The incidence of co-morbidities related to obesity and overweight: a systematic review and meta-analysis. *BMC Public Health.* 2009 Mar 25;9:88. doi: 10.1186/1471-2458-9-88.
  76. Emond JA, Patterson RE, Jardack PM, Arab L. Using doubly labeled water to validate associations between sugar-sweetened beverage intake and body mass among White and African-American adults. *Int J Obes (Lond).* 2014 Apr;38(4):603-9. doi: 10.1038/ijo.2013.130.
  77. Grimes CA, Riddell LJ, Campbell KJ, Nowson CA. Dietary salt intake, sugar-sweetened beverage consumption, and obesity risk. *Pediatrics.* 2013 Jan;131(1):14-21. doi: 10.1542/peds.2012-1628.
  78. Parikh NI, Gona P, Larson MG, Fox CS, Benjamin EJ, Murabito JM, et al. Long-term trends in myocardial infarction incidence and case fatality in the National Heart, Lung, and Blood Institute's Framingham Heart study. *Circulation.* 2009;119:1203–1210.
  79. Floyd KC, Yarzebski J, Spencer FA, Lessard D, Dalen JE, Alpert JS, et al. A 30-year perspective (1975–2005) into the changing landscape of patients hospitalized with initial acute myocardial infarction: Worcester Heart Attack Study. *Circ Cardiovasc Qual Outcomes.* 2009;2:88–95.
  80. Roger VL, Weston SA, Gerber Y, Killian JM, Dunlay SM, Jaffe AS, et al. Trends in incidence, severity, and outcome of hospitalized myocardial infarction. *Circulation.* 2010;121:863–869.
  81. Yeh RW, Sidney S, Chandra M, Sorel M, Selby JV, Go AS. Population trends in the incidence and outcomes of acute myocardial infarction. *N Engl J Med.* 2010;362:2155–2165.
  82. Foster T, Anania FA, Li D, Katz R, Budoff M. The prevalence and clinical correlates of nonalcoholic fatty liver disease (NAFLD) in African Americans: the multi ethnic study of atherosclerosis (MESA). *Dig Dis Sci.* 2013 Aug;58(8):2392-8. doi: 10.1007/s10620-013-2652-7.
  83. Farrell GC, Larter CZ. Nonalcoholic fatty liver disease: from steatosis to cirrhosis. *Hepatology.* 2006 Feb;43(2 Suppl 1):S99-S112.
  84. Zhang E1, Wartelle-Bladou C, Lepanto L, Lachaine J, Cloutier G, Tang A. Cost-utility analysis of nonalcoholic steatohepatitis screening. *Eur Radiol.* 2015 May 21. [Epub ahead of print]
  85. Baumeister SE1, Völzke H, Marschall P, John U, Schmidt CO, Flessa S, et al. Impact of fatty liver disease on health care utilization and costs in a general population: a 5-year observation. *Gastroenterology.* 2008 Jan;134(1):85-94.
  86. McAdam-Marx C1, McGarry LJ, Hane CA, Biskupiak J, Deniz B, Brixner DI. All-cause and incremental per patient per year cost associated with chronic hepatitis C virus and associated liver complications in the United States: a managed care perspective. *J Manag Care Pharm.* 2011 Sep;17(7):531-46.
  87. Patel D, Terrault NA, Yao FY, Bass NM, Ladabaum U. Cost-effectiveness of hepatocellular carcinoma surveillance in patients with hepatitis C virus-related cirrhosis. *Clin Gastroenterol Hepatol.* 2005 Jan;3(1):75-84.
  88. Thein HH, Isaranuwatthai W, Campitelli MA, Feld JJ, Yoshida E, Sherman M, et al. Health care costs associated with hepatocellular carcinoma: a population-based study. *Hepatology.* 2013 Oct;58(4):1375-84. doi: 10.1002/hep.26231. Epub 2013 Mar 15.
  89. Lightwood J, Bibbins-Domingo K, Coxson P, Wang YC, Williams L, Goldman L. Forecasting the future economic burden of current adolescent overweight: an estimate of the coronary heart disease policy model. *Am J Public Health.* 2009 Dec;99(12):2230-7. doi: 10.2105/AJPH.2008.152595.
  90. American Diabetes Association. Economic costs of diabetes in the U.S. in 2012. *Diabetes Care.* 2013 Apr;36(4):1033-46. doi: 10.2337/dc12-2625.
  91. Li Q, Blume SW, Huang JC, Hammer M, Graf TR. The Economic Burden of Obesity by Glycemic Stage in the United States. *Pharmacoeconomics.* 2015 Jul;33(7):735-48. doi: 10.1007/s40273-014-0248-5.
  92. Murray CJ, Vos T, Lozano R, Naghavi M, Flaxman AD, Michaud C, et al. Disability-adjusted life years (DALYs) for 291 diseases and injuries in 21 regions, 1990-2010: a systematic analysis for the Global Burden of Disease Study 2010. *Lancet.* 2012 Dec 15;380(9859):2197-223. doi: 10.1016/S0140-6736(12)61689-4.
  93. Keating CL1, Peeters A, Swinburn BA, Magliano DJ, Moodie ML. Utility-based quality of life associated with overweight and obesity: the Australian

1  
2  
3  
4  
5  
6  
7  
8  
9  
10  
11  
12  
13  
14  
15  
16  
17  
18  
19  
20  
21  
22  
23  
24  
25  
26  
27  
28  
29  
30  
31  
32  
33  
34  
35  
36  
37  
38  
39  
40  
41  
42  
43  
44  
45  
46  
47  
48  
49  
50  
51  
52  
53  
54  
55  
56  
57  
58  
59  
60

diabetes, obesity, and lifestyle study. Obesity (Silver Spring). 2013 Mar;21(3):652-5. doi: 10.1002/oby.20290.

94. Global Health Data Exchange. Global Burden of Disease Study 2010 (GBD 2010) Life Expectancy and Healthy Life

Expectancy 1970-2010. Institute for Health Metrics and Evaluation. Accessed at <http://ghdx.healthdata.org/record/global-burden-disease-study-2010-gbd-2010-life-expectancy-and-healthy-life-expectancy-1970> on Apr 23, 2015.

95. Murray CJ, Ezzati M, Flaxman AD, Lim S, Lozano R, Michaud C, GBD 2010: design, definitions, and metrics. Lancet. 2012 Dec 15;380(9859):2063-6. doi: 10.1016/S0140-6736(12)61899-6.

For peer review only

**Additional file 1**

EVEREST Statement: Checklist for health economics paper

|                                                                                                                                                | <b>Study section</b>                         | <b>Additional remarks</b>                                              |
|------------------------------------------------------------------------------------------------------------------------------------------------|----------------------------------------------|------------------------------------------------------------------------|
| <b>Study design</b>                                                                                                                            |                                              |                                                                        |
| (1) The research question is stated                                                                                                            | Introduction                                 | Page 2                                                                 |
| (2) The economic importance of the research question is stated                                                                                 | Introduction                                 | Page 2                                                                 |
| (3) The viewpoint(s) of the analysis are clearly stated and justified                                                                          | Introduction, Methods                        | Page 2 and page 4-5 (interventions)                                    |
| (4) The rationale for choosing the alternative programmes or interventions compared is stated                                                  | Methods                                      | Page 4-5 (interventions)                                               |
| (5) The alternatives being compared are clearly described                                                                                      | Methods                                      | Page 4-5 (interventions)                                               |
| (6) The form of economic evaluation used is stated                                                                                             | Methods                                      | Page 3                                                                 |
| (7) The choice of form of economic evaluation is justified in relation to the questions addressed                                              | Introduction, Methods                        | Page 3                                                                 |
|                                                                                                                                                |                                              |                                                                        |
| <b>Data collection</b>                                                                                                                         |                                              |                                                                        |
| (8) The source(s) of effectiveness estimates used are stated                                                                                   | Methods; Table 1, Table 2                    | Page 5 and 6                                                           |
| (9) Details of the design and results of effectiveness study are given (if based on single study)                                              | N/A                                          | Data derived from peer reviewed literature and national health surveys |
| (10) Details of the method of synthesis or meta-analysis of estimates are given (if based on an overview of a number of effectiveness studies) | Methods                                      | Page 6                                                                 |
| (11) The primary outcome measure(s) for the economic evaluation are clearly stated                                                             | Methods                                      | Page 5                                                                 |
| (12) Methods to value health states and other benefits are stated                                                                              | Methods                                      | Page 5; table 1                                                        |
| (13) Details of the subjects from whom valuations were obtained are given                                                                      | N/A                                          |                                                                        |
| (14) Productivity changes (if included) are reported separately                                                                                | N/A                                          |                                                                        |
| (15) The relevance of productivity changes to the study question is discussed                                                                  | N/A                                          |                                                                        |
| (16) Quantities of resources are reported separately from their unit costs                                                                     | Methods; stated per person; Table 1, Table 2 | Page 5 and 6                                                           |
| (17) Methods for the estimation of quantities and unit costs are described                                                                     | Methods; Table 1, Table 2                    | Page 5 and 6; Adopted from literature                                  |

|                                                                                              |                           |              |
|----------------------------------------------------------------------------------------------|---------------------------|--------------|
| (18) Currency and price data are recorded                                                    | Methods; Table 1, Table 2 | Page 5 and 6 |
| (19) Details of currency of price adjustments for inflation or currency conversion are given | Methods                   | Page 5       |
| (20) Details of any model used are given                                                     | Methods                   | Page 3       |
| (21) The choice of model used and the key parameters on which it is based are justified      | Methods                   | Page 3       |
|                                                                                              |                           |              |
| <b>Analysis and interpretation of results</b>                                                |                           |              |
| (22) Time horizon of costs and benefits is stated                                            | Methods                   | Page 5       |
| (23) The discount rate(s) is stated                                                          | Methods                   | Page 5       |
| (24) The choice of rate(s) is justified                                                      | Methods                   | Page 5       |
| (25) An explanation is given if costs or benefits are not discounted                         | N/A                       |              |
| (26) Details of statistical tests and confidence intervals are given for stochastic data     | N/A                       |              |
| (27) The approach to sensitivity analysis is given                                           | Methods                   | Page 6       |
| (28) The choice of variables for sensitivity analysis is justified                           | Methods; Table 1, Table 2 | Page 6       |
| (29) The ranges over which the variables are varied are stated                               | Table 1, Table 2          | Page 6       |
| (30) Relevant alternatives are compared                                                      | Methods, Results          | Page 4 and 5 |
| (31) Incremental analysis is reported                                                        | N/A                       |              |
| (32) Major outcomes are presented in a disaggregated as well as aggregated form              | Table 3, 4 and 5          | Page 7 and 9 |
| (33) The answer to the study question is given                                               | Discussion, Conclusion    | Page 10      |
| (34) Conclusions follow from the data reported                                               | Conclusion                | Page 11      |
| (35) Conclusions are accompanied by the appropriate caveats                                  | Discussion, Conclusion    | Page 10      |

# BMJ Open

## Health and economic benefits of reducing sugar intake in the United States, including effects via non-alcoholic fatty liver disease: A microsimulation model

|                                 |                                                                                                                                                                                                                                                                                                                                                                                                                                                                                                                                                                                                                                                                                                                          |
|---------------------------------|--------------------------------------------------------------------------------------------------------------------------------------------------------------------------------------------------------------------------------------------------------------------------------------------------------------------------------------------------------------------------------------------------------------------------------------------------------------------------------------------------------------------------------------------------------------------------------------------------------------------------------------------------------------------------------------------------------------------------|
| Journal:                        | <i>BMJ Open</i>                                                                                                                                                                                                                                                                                                                                                                                                                                                                                                                                                                                                                                                                                                          |
| Manuscript ID                   | bmjopen-2016-013543.R3                                                                                                                                                                                                                                                                                                                                                                                                                                                                                                                                                                                                                                                                                                   |
| Article Type:                   | Research                                                                                                                                                                                                                                                                                                                                                                                                                                                                                                                                                                                                                                                                                                                 |
| Date Submitted by the Author:   | 20-Jun-2017                                                                                                                                                                                                                                                                                                                                                                                                                                                                                                                                                                                                                                                                                                              |
| Complete List of Authors:       | Vreman, Rick; University of California, San Francisco, Philip R. Lee Institute for Health Policy Studies<br>Goodell, Alex; University of California, San Francisco, Philip R. Lee Institute for Health Policy Studies<br>Rodriguez, Luis; University of California, Department of Epidemiology & Biostatistics<br>Porco, Travis; University of California, San Francisco, FI Proctor Foundation for Research in Ophthalmology<br>Lustig, Robert; University of California, San Francisco, Philip R. Lee Institute for Health Policy Studies; University of California San Francisco, Department of Pediatrics<br>Kahn, James; University of California, San Francisco, Philip R. Lee Institute for Health Policy Studies |
| <b>Primary Subject Heading</b>: | Public health                                                                                                                                                                                                                                                                                                                                                                                                                                                                                                                                                                                                                                                                                                            |
| Secondary Subject Heading:      | Nutrition and metabolism, Health policy, Health economics, Diabetes and endocrinology                                                                                                                                                                                                                                                                                                                                                                                                                                                                                                                                                                                                                                    |
| Keywords:                       | Added sugar, Non-alcoholic fatty liver disease, Type 2 diabetes, Microsimulation, Obesity, Fructose                                                                                                                                                                                                                                                                                                                                                                                                                                                                                                                                                                                                                      |
|                                 |                                                                                                                                                                                                                                                                                                                                                                                                                                                                                                                                                                                                                                                                                                                          |

SCHOLARONE™  
Manuscripts

# Health and economic benefits of reducing sugar intake in the United States, including effects via non-alcoholic fatty liver disease: A microsimulation model

Rick A Vreman<sup>1</sup>, Alex J Goodell<sup>1</sup>, Luis A Rodriguez<sup>2</sup>, Travis C Porco<sup>2,3</sup>, Robert H Lustig<sup>1,4</sup>, James G Kahn<sup>1</sup>

<sup>1</sup> Philip R. Lee Institute for Health Policy Studies, University of California San Francisco, California, United States of America;

<sup>2</sup> Department of Epidemiology & Biostatistics, University of California, San Francisco, California, United States of America;

<sup>3</sup> FI Proctor Foundation for Research in Ophthalmology, University of California, San Francisco, United States of America

<sup>4</sup> Department of Pediatrics, University of California San Francisco, California, United States of America

Contact information corresponding author:

Rick A Vreman

Nachtegaalstraat 20 BisA

3581 AH Utrecht

The Netherlands

T: +31-614661403

E: r.a.vreman@gmail.com

## Abstract

**Objectives:** Excessive consumption of added sugars in the human diet has been associated with obesity, type 2 diabetes (T2D), coronary heart disease (CHD), and other elements of the metabolic syndrome. Recent studies have shown that non-alcoholic fatty liver disease (NAFLD) is a critical pathway to metabolic syndrome. This model assesses the health and economic benefits of interventions aimed at reducing intake of added sugars.

**Methods:** Using data from U.S. National Health Surveys and current literature, we simulated an open cohort, for the period 2015 to 2035. We constructed a microsimulation model with Markov chains for NAFLD (including steatosis, non-alcoholic steatohepatitis (NASH), cirrhosis, and hepatocellular carcinoma (HCC)), body mass index (BMI), T2D, and CHD. We assessed reductions in population disease prevalence, disease-attributable disability-adjusted life years (DALYs), and costs, with interventions that reduce added sugars consumption by either 20% or 50%.

**Findings:** The model estimated that a 20% reduction in added sugars intake will reduce prevalence of hepatic steatosis, NASH, cirrhosis, HCC, obesity, T2D, and CHD. Incidence of T2D and CHD would be expected to decrease by 19.9 (95% CI: 12.8 – 27.0) and 9.4 (95% CI: 3.1 – 15.8) cases per 100,000 people after 20 years, respectively. A 20% reduction in consumption is also projected to annually avert 0.767 million (M) DALYs (95% CI: 0.757M – 0.777M), and a total of 10.3 billion (B) USD (95% CI: 10.2B – 10.4B) in discounted direct medical costs by 2035. These effects increased proportionally when added sugars intake were reduced by 50%.

**Conclusions:** The decrease in incidence and prevalence of disease is similar to results in other models, but averted costs and DALYs were higher, mainly due to inclusion of NAFLD and CHD. The model suggests that efforts to reduce consumption of added sugars may result in significant public health and economic benefits.

Strengths and limitations of this study

- This model captures the full effects of dietary sugar acting on non-alcoholic fatty liver disease, as well as obesity, type 2 diabetes and coronary heart disease.
- The model is based on input parameters from multiple studies which were of mixed quality and alignment with the modelled population. We examined large uncertainty intervals to assess robustness of results.
- The model does not consider a shift to non-sugared caloric foods.

## Introduction

The social and economic burdens of chronic metabolic disease have been increasing in the United States for the last three decades. Two-thirds of the adult population in the United States is now overweight, and morbid obesity affects 9.9% of all adult women.[1] Prevalence of Type 2 diabetes (T2D) in the U.S. is at 9.3%.[2,3] And the population affected by Coronary heart disease (CHD) increased concurrently from 13 to 15.5 million over the last ten years.[4,5] More than 15% of all deaths are attributable to CHD and more than 3% to diabetes.[6] Costs have simultaneously increased; and costs for CHD are expected to double over the next two decades.[7,8] Though these figures are stunning, they underestimate the magnitude of the problem. Non-alcoholic fatty liver disease (NAFLD) has recently been found to be present in over 45% of Latinos, 33% of Caucasians, and 24% of African-Americans, and is thought to play an important role in metabolic pathophysiology.[9–12] NAFLD is defined by the presence of liver fat in the absence of a primary insult such as alcohol, viral hepatitis, or heavy metal accumulation.[13] NAFLD is further categorized into: a) hepatic steatosis, which is a reversible fat accumulation in the liver defined by an occupation of steatotic hepatocytes of more than 5% of the liver parenchyma; and b) non-alcoholic steatohepatitis (NASH), which is defined as the presence of hepatic steatosis along with lobular and portal inflammation with hepatocyte injury (ballooning). Progressive collagen deposition and vascular remodelling in NASH may lead to cirrhosis, which in turn predisposes one to hepatocellular carcinoma (HCC).[9,13–15] NAFLD is the most common cause of liver disease in the Western world, and NASH is projected to become the leading cause of liver transplantation in the USA by the year 2020.[16,17] Currently 30–40% of NASH-cirrhotic patients succumb to a liver-related death within 10 years.[18,19] Hospitalizations for NAFLD have increased 97% between 2000 and 2012.[20] NAFLD has also been suggested as an important driver of T2D in lean individuals, as liver fat accumulation can cause insulin resistance.[10,21–23] NAFLD can occur as either a cause or consequence of the metabolic syndrome[10], and many now argue that NAFLD is the hepatic manifestation of metabolic syndrome, and should be included in its definition.[24–27] It is important to identify determinants of these metabolic diseases and assess the efficacy of upstream policy interventions to curb the national and the global epidemic of metabolic syndrome.

### *Added sugars*

Added sugars consumption increased in the U.S. over the years 1977–2000, decreased slightly between 2000–2008, and seems to have stabilized in the years thereafter.[28–30] Over 55% of all American adults consumed more than 50 grams of added sugars per day between 2005–2012, which is thought to be the cut-off value for added risk of metabolic derangement, and more than the advised maximum according to the American Heart Association (25 - 37.5 grams).[3,31] The U.S. Department of Agriculture recently established guidance for an upper limit of consumption of added sugars at 10% of total energy intake (amounting to 50 grams per day (200 kcal) for a prototype 2000 kcal/day diet).[32] The European Food and Safety authority does not state an explicit maximum for (added) sugars in their advice, but they do note that a number of authorities have established boundaries of <10% of total energy intake.[33] Furthermore, the American Heart Association recommends that U.S. adolescents restrict their intake of added sugars to less than 25 grams to avoid dyslipidaemia and CVD [34], yet current intake averages 94.0 grams per day in this age group.[35]

The excessive amount of added sugars (glucose + fructose) in the food supply has been associated with NAFLD and with each of the component diseases of the metabolic syndrome.[36–38] Fructose is metabolized by the liver, as it is the only organ with the required Glut5 transporter. Fructose bypasses glycogen, and is metabolized by the glycolytic pathway to acetyl-CoA. From there, excess acetyl-CoA is converted to citrate, diverted from the mitochondria into the cytoplasm via the citrate shuttle, and is then converted into fatty acids through the process of *de novo* lipogenesis(DNL).[39] From there, hepatically-derived excess triglyceride is either packaged with apo-B100 into very-low-density-lipoprotein (VLDL), which is released into the bloodstream and can foment cardiovascular disease; or will precipitate as a lipid droplet, resulting in hepatic steatosis which drives insulin resistance, causing weight gain, and predisposing to T2D. While most early studies of added sugar and chronic disease were correlative and confounded by excess caloric administration, lack of adjustment for total calories, or adiposity, more recent studies demonstrate that the effect is specific for dietary fructose, and independent of calories consumed and BMI.[39–48] For instance, added sugar is directly correlated with risk for metabolic syndrome in adolescents in NHANES even after controlling for total calories and BMI z-score.[35] Added sugar has been associated with elevated uric acid levels and hypertension.[49,50] Two recent studies, both controlled for calories and adiposity and employing a time analysis, support sugar-sweetened beverages as a specific causative agent in the pathogenesis of T2D.[42,51,52] A decade-long global econometric analysis demonstrates that only changes in sugar availability are predictive of changes in diabetes prevalence, unrelated to poverty, urbanization, aging, physical activity, total calories, or obesity.[37] Lastly, in a starch-for-sugar exchange study, our group has documented improvements in metabolic and lipid parameters unrelated to both calories and changes in weight, demonstrating improved metabolic health within 10 days.[40,53] We have demonstrated that the decline in DNL and resultant reduction in liver fat was the primary driver in the metabolic and cardiovascular improvement.[54] By demonstrating that removal of dietary fructose (the macronutrient most closely associated with DNL) commensurately improves liver fat and insulin dynamics irrespective of calories or weight, we are able to infer a causative mechanism of metabolic dysfunction by linking DNL to both liver fat and insulin resistance. We also demonstrated that despite an increase in the glucose (starch) content of the diet, beta-cell insulin secretion reduced, thus protecting against beta-cell exhaustion, thought to be important in the pathogenesis of type 2 diabetes[55]; and reducing total body insulin burden, thought to contribute to both obesity and risk for cardiovascular disease.[56,57] Thus, reduction in DNL and liver fat through reduction in consumption of added sugars appears to be a

primary goal of both therapy and prevention of chronic metabolic disease, and forms the rationale for our microsimulation model.

#### *Intervention efficacy*

Several studies have modeled the effects of different interventions to reduce added sugars intake. One popular intervention is the implementation of a sugar-sweetened beverage (SSB) tax. Though this does not affect all added sugars in the food supply, SSB's are the main single contributor to overall added sugars intake, and a tax on SSB's is easier to implement than an added sugars tax.[58] A 20% SSB tax is projected to reduce prevalence of obesity anywhere from 1.5 — 10%, based on different studies.[59–61] Data from Mexico demonstrate that effects on reduction of consumption are durable, although evidence of mitigation of disease are not yet available.[62] Annual diabetes cases would be expected to decline concurrently between 1.8% and 3.4%, and CHD cases by 0.5 — 1.0%.[60,63] Additional research has focused on other strategies to lower added sugars consumption. Banning SSB's from the U.S. Supplemental Nutrition Assistance Program (SNAP) is expected to result in a 0.89% lower obesity prevalence within 10 years, while lowering the amount of sugars in the food supply through a cap and trade approach by 1% annually is expected to lower the prevalence of obesity by 1.7% after 20 years.[64,65]

An important limitation of all these studies is that none of these models incorporate the effects and costs related to sugar-induced NAFLD. Because NAFLD explains a part of the incidence of diabetes in lean individuals and is expected to contribute significantly to overall healthcare burden and costs, it is necessary that models incorporate all of these diseases.

Our goal is to predict the magnitude of the health and economic effects of interventions that are designed to reduce added sugars consumption either by 20% or 50%, respectively. This modelling approach more precisely quantifies the benefits of reducing added sugar consumption. We describe the process of creating, calibrating and validating a microsimulation model. We clarify the relevant interactions that determine progression within this model in Markov chains for NAFLD (including cirrhosis and HCC), obesity, T2D, and CHD, and we describe the creation of a simulated open cohort representative of the US population. We allow the model to run for 20 years into the future to predict effectiveness. We report the outcomes of these simulations in future incidence, prevalence and mortality of disease, and in disability-adjusted life years (DALYs) and costs averted.

#### **Methods**

The Methods section is constructed according to the recommendations by the ISPOR taskforce for good modelling practice, and completeness is checked according to the CHEERS statement.[66,67]

#### *Summary*

We constructed an individual based model consisting of a base cohort of 22,400 people. New people entered the model each year at age 20, the youngest age group we simulate. Individuals are assigned a state at initialization in each 'chain' of the model. These include age, sex, ethnicity, sugar consumption, NAFLD, BMI, T2D, and CHD. The current health state of each individual at the beginning of a cycle forms a risk profile, and the presence in a risk-inducing state in one of the chains can influence the probability of transitioning between states in a different chain, according to literature-based odds ratios. We simulated 20 annual cycles for each individual, counting events, incurred direct medical costs, and DALYs for each cycle, as well as the overall prevalence for the total cohort. We discounted the costs and DALYs by 3.0% annually, and costs were presented in 2015 USD. Two interventions were simulated: one that reduced each individual's added sugars consumption by 20%, and one that reduced it by 50%. We used identical random numbers for the base case scenario and each of the interventions, to reduce variance. We calibrated the model to other studies reporting historic trends and predicting future prevalence, and validated the model via face validation, cross-validation, and sensitivity analyses. Deterministic sensitivity analysis was used to determine the influence of individual input parameters. Probabilistic sensitivity analysis was used to generate mean results and 95% central coverage intervals.

#### *Model type*

An individual-based stochastic Markov model (microsimulation) was used. The model contained a chain for each of four separate diseases. Because each of these diseases has a minimum of 3 states, and the transitions between these states are based on the presence or absence of a set of risk factors, the state-space explosion phenomenon prohibits us from using traditional Markov cohort simulation. An individual-based approach makes it possible to use individual-specific transition rates, capturing the effect of interventions on individual risk factor profiles, thereby avoiding the need to count the number of individuals in all possible states and allowing for complex relationships between several risk factors within a single individual.[68] It also opens up potential for future analyses among subgroups.

#### *Population and setting*

The model is based on the adult population (age 20+) of the United States. Outcomes are reported from a healthcare perspective. This includes direct medical costs and DALYs averted. Indirect medical or non-medical costs are excluded. Because this model is meant to assess the benefits of reducing added sugars intake, unrelated to the type of intervention, costs of implementing any specific intervention and possible revenues (e.g. in the case of an excise or general services tax) are also excluded.

### *Model structure and input parameters*

A simplified model transition diagram is presented in **Figure 1**. Model input parameters are presented in **table 1 and 2** and supplementary **table 1**. Individuals will reside in a state within each chain at any given point in time. The probability of staying within a state or moving to another state in each cycle is determined by a set of defined transition probabilities, which are influenced by the risk profile (the current state in the other chains) of the individual. Events in different chains can occur in parallel.

The simulation is initialized by assignment of age (A), sex (S), and ethnicity (E) to each individual. Age states are based on the population distribution that is provided by the Bureau of the Census, and are specified for each age from 20 to 84 and a cumulative age group for anyone above 85. We simulate an open cohort. New individuals with age 20 enter each year.[69] The initial age distribution is specified in supplementary **table 2**. Male and female sex are incorporated with an initial distribution specified in supplementary **table 3**. Ethnicities incorporated into the model are Hispanic, non-Hispanic black, and non-Hispanic-white. Data availability did not allow us to incorporate Asians and Native Americans as separate groups and therefore they were grouped with the non-Hispanic whites. The initial ethnicity distribution is specified in supplementary **table 4**.

When the individual is assigned an age, sex and ethnicity, these determine the state that this individual will be assigned to in each of the chains for NAFLD, BMI, T2D, and CHD at the start of the simulation. Each chain represents a separate disease process, and has its own non-disease state (e.g., non-T2D). This does not mean that this person is actually healthy (e.g. a person can have cirrhosis but not diabetes). The NAFLD chain includes a non-NAFLD state, and states for hepatic steatosis, NASH, cirrhosis, and NASH- or cirrhosis-related HCC. A person is defined as having NAFLD when his or her current state is steatosis, NASH, or cirrhosis. This is different from common terminology, where cirrhosis is excluded. We chose this definition for easy reference, because these three states imply extra risk for progression within other chains. The initial distribution over NAFLD states is specified in supplementary **table 5** and specified per ethnicity group.

It is important to note that modeled cirrhosis and HCC are specifically related to steatosis and NASH, and do not include all cirrhosis and HCC cases within the population, irrespective of cause. Transition directly from the non-NAFLD state to either one is therefore not possible. Baseline transition probabilities are specified in **table 2** and transition rates from NASH and cirrhosis to HCC are specified per age group, as defined in supplementary **table 6 and 7**, starting at age 40. (age groups: 40-44, 50-54, 55-59, 60-64, 65-69, 70-74, 75-79 and 80 years and over). Risk factors for progression are stated in **table 2** and include ethnicity (protective and detrimental factors), being overweight or obese, and high sugar consumption. These risk factors apply for transitions up to the cirrhosis state.

The BMI chain includes states for healthy weight, overweight and obesity. The initial distribution over BMI states is specified in supplementary **table 8**, and specified by sex, ethnicity, and age group (ages 20-35, 35-44, 45-54, 55-64, 65-74, 75-84 and 85+). Baseline transition probabilities are specified in **table 2**. Risk factors for progression are stated in **table 1** and include NAFLD disease states and high sugar consumption.

The T2D chain includes a non-T2D state and a T2D state. The initial distribution over T2D states is specified in supplementary **table 9** and specified by sex, ethnicity, and age group (ages 20-35, 35-44, 45-54, 55-64, 65-74 75-84 and 85+). Average baseline transition probability to T2D is specified in **table 2** and age-specific incidence rates are provided in supplementary **table 10** (age groups: 20-24, 25-29, 30-34, 35-39, 40-44, 45-49, 50-54, 55-59, 60-64, 65-69, 70-74, 75-79 and 80+). Risk factors for progression to T2D are stated in **table 2** and include NAFLD disease states, overweight, and obesity.

The CHD chain includes a non-CHD state and a CHD state. The distribution over CHD states at simulation start is specified in supplementary **table 11** and specified per sex, ethnicity and age group (ages 20-44, 45-64 and 65+). Average baseline transition probability to CHD is specified in **table 2** and age-specific incidence rates are provided in supplementary **table 12** (age groups: <35, 35-39, 40-44, 45-49, 50-54, 55-59, 60-64, 65-69, 70-74, 75-79, 80-84 and 85+). Risk factors for progression to CHD are stated in **table 2** and include NAFLD disease states, overweight, obesity, and T2D.

Each individual is assigned a level of consumption of added sugars. There are two states in the sugar chain — high consumption ( $\geq 50$ g of added sugars per day), and low consumption ( $< 50$ g of added sugars per day). The distribution of these states among the study population reflects the data of the NHANES 2005-2012, and is specified per sex and ethnicity group, as shown by supplementary **table 13**. [3,35] Dietary intake data in NHANES were collected using two 24-hr dietary recalls, following the United States Department of Agriculture's (USDA) Automated Multiple Pass Method and administered to the adult.[70] The arithmetic mean of added sugar intake in grams per day was obtained by merging individual dietary recalls from NHANES with the USDA Food Patterns Equivalents Database (FPED).[71] Sugar consumption is fixed throughout the simulation for each person.

From each state, individuals can transition to a 'non-disease related death' state. Three disease chains also have a disease-specific death state (i.e.. T2D-death, CHD-death, and liver-related death), allowing calculation of disease-attributable death. Mortality rates from causes outside the model were corrected for the competing risks of modeled causes of mortality to

1  
2  
3 ensure valid overall mortality. Death in one chain forces an instant transition to the death state in other chains. Average  
4 transition probabilities to disease-related death states are specified in **table 2**. Age specific rates for T2D-related death are  
5 specified in supplementary **table 14**. Liver death rates are specified in **table 2**. Deaths were attributed to the disease for  
6 which the transition to death was established first. To remove confounding because of calculation order, chain calculation  
7 order was randomized. This ensures that deaths are attributed to the right disease, e.g. people with T2D and CHD have a  
8 chance to die of T2D, CHD or succumb to a non-disease related death.

9 To determine whether there were temporal trends in incidence or death rates, we plotted the available historic data (1999-  
10 2013) and projected this to the future.[5,6,72] These trends were found to be present for the incidence and mortality rate  
11 of CHD, and for the non-disease specific mortality rate. We incorporated these regression rates into the model by adjusting  
12 the respective baseline transition probabilities before each cycle. Average baseline transition probabilities for CHD and non-  
13 disease related deaths are specified in **table 2**. The CHD-specific death rates by year and age are specified in supplementary  
14 **table 15** and the non-disease related death rates per year and age are specified in supplementary **table 16**. For DALY  
15 calculations, health-adjusted life expectancy for females and males are provided in **supplementary table 17 and 18**.

16 Final transition probabilities per chain are compared to a pseudo-random number to determine state-transitions each cycle.  
17 These final transition probabilities were derived from baseline transition probabilities, adjusting for the relative risk of  
18 progression observed for applicable risk factors. The correction formula for the baseline transition probabilities is a  
19 multiplicative function of all applicable values (odds ratios) for present risk factors. As an example, imagine a person with  
20 high sugar consumption, obesity, and hepatic steatosis, but no T2D or CHD (disregarding age, sex & ethnicity in this  
21 example). In the NAFLD chain the transition from steatosis to NASH has a baseline transition probability of 0.0060 (see table  
22 2). This is adjusted to reflect the ORs for applicable risk factors (3.14 for obesity and 2.00 for high sugar consumption),  
23 resulting in a revised transition probability of  $0.0060 * 3.14 * 2.00 = 0.0377$ . Similar adjustments are made for transitions to  
24 cirrhosis, HCC, death, and non-NAFLD. What remains is the probability of remaining in the steatosis state.

#### 25 **Figure 1**

##### 26 *Interventions*

27 Two interventions were simulated: a reduction of 20%, and a reduction of 50% in individual added sugars consumption. A  
28 20% reduction in added sugars was simulated to be consistent with the percentage reduction assessed in several  
29 studies.[59–61] In addition, a 50% reduction was simulated because the American Heart Association advises 6-9 teaspoons  
30 of added sugar (for females and males respectively) as a maximum per day, which is approximately 50% of the current  
31 average consumption.[3,31,35] The individual added sugars consumption distribution was then split into a dichotomous  
32 variable; with people consuming less than or equal to 50 grams of added sugars being considered low consumers, and  
33 people consuming more than 50 grams per day being considered high consumers. This model did not incorporate  
34 substitutions to other food categories, but it did incorporate the overall added sugars reduction, rather than a sole  
35 reduction in SSB consumption used in other studies.[60,63] This makes it possible to capture the overall effects of added  
36 sugars, contrary to the solitary effect of SSB's. The effects of changes in food consumption to other food groups (e.g.  
37 proteins, fat) are not modeled. Detrimental effects of these food categories are less well documented and inferior to the  
38 effects of added sugars. NHANES data was used to reduce individual added sugars consumption by the specified amount.  
39 From these data, new distributions were calculated to reflect subgroup consumption patterns. These distributions  
40 determined the ratio between individuals in the high and the low risk group, and therefore determine progression within  
41 disease chains. Identical random numbers were used between interventions to reduce variance, as described by Stout and  
42 Goldie.[73]

##### 43 *Time horizon, cycle length*

44 The model had a time horizon of 20 years, modeling the calendar years 2015 to 2035. This duration was chosen to make  
45 sure effects within chronic diseases (T2D, CHD) were sufficiently visible. The cycle length was 1 year. Individuals could exit  
46 the model through each death state, or live until the end of the simulation.

##### 47 *Outcomes*

48 Outcomes were incidence, prevalence and mortality of disease, and direct medical costs and DALYs averted. Costs were  
49 calculated by multiplying prevalence by discounted disease-attributable costs. DALYs were calculated by adding years lived  
50 with disability (YLD) and years of life lost (YLL). YLD was calculated as the product of the prevalence of disease times the  
51 discounted disability weight. YLL was calculated by multiplying the discounted health-adjusted life expectancy at death by  
52 the amount of people that died in that specific year, given a certain age and sex. The discount rate for costs, disability  
53 weights, and life expectancy was 3.0% annually. Health-adjusted life expectancy and discounted life expectancy for males  
54 and females for the United States were not derived by the model but implemented directly from publications of the  
55 Institute for Health Metrics and Evaluation (IHME). They are provided in the online supplement, **table 3 and 4**.

##### 56 *Input parameter determination*

The model parameters that determined demographics and the distribution of risk factors and disease at the start of the simulation are mainly derived from NHIS and NHANES data. If data were not sufficient, current literature was consulted. Model input parameters, their distribution ranges, and the sources from which they were acquired are presented in **tables 1 and 2**. Baseline transition probabilities were derived from literature data, and where necessary, via calibration. Also when necessary, we used logistic conversion to adjust transition rates to reflect annual probabilities. Interaction values were derived from literature data. For interactions between chains, we used conservative data when possible, to ensure no overestimation of effect size. We took special care to ensure these odds ratios reflect the case for our model, i.e. reflect decreased risk due to a reduction in overall added sugars intake, not just a reduction in sugar-sweetened beverage intake, which is more commonly investigated. Regression rates were determined by historic and projected trends reported by the CDC and the American Heart Association.[3,5,6] Costs were derived from American population-based studies and, where necessary, were inflated by the inflation calculator of the United States Department of Labor Statistics to 2015 USD.[74] Costs were calculated as specific disease-attributable costs (i.e. costs for CHD due to diabetes were counted as costs due to CHD rather than costs due to diabetes). This was necessary to prevent overlapping costs. Disability weights were adopted from World Health Organizations' burden of disease estimates and current literature. Specific sources are provided in the tables.

**Table 1.** Model input values and ranges for disease characteristics. Costs are population based, meaning that they include those who do not get care.

| Disease state | Prevalence at simulation start |         |         |           | Costs (annual) |        |            | Disability weights |       |       |         |
|---------------|--------------------------------|---------|---------|-----------|----------------|--------|------------|--------------------|-------|-------|---------|
|               | Mean                           | Min     | Max     | Ref.      | Mean           | SD     | Ref.       | Mean               | Min   | Max   | Ref.    |
| Steatosis     | 27.955% <sup>#</sup>           | 18.637% | 41.933% | [8,16,18] | 134            | 50     | [75]       | 0.000              | 0.000 | 0.000 | [76–78] |
| NASH          | 3.141% <sup>#</sup>            | 2.094%  | 4.712%  | [8,16,18] | 267            | 100    | [75]       | 0.033              | 0.017 | 0.066 | [76–78] |
| Cirrhosis     | 0.314% <sup>#</sup>            | 0.209%  | 0.471%  | [79,80]   | 2,861          | 1073   | [81]       | 0.194              | 0.127 | 0.273 | [10,75] |
| HCC           | 0.025% <sup>#</sup>            | 0.017%  | 0.038%  | [82,83]   | 42,644         | 15,992 | [76,84,85] | 0.294              | 0.199 | 0.411 | [76–78] |
| CHD           | 6.544% <sup>#</sup>            | -       | -       | [1,2,6]   | 13,233         | 4962   | [6,86]     | 0.066              | 0.043 | 0.095 | [76]    |
| T2D           | 9.447% <sup>#</sup>            | -       | -       | [1,2]     | 8,170          | 3064   | [86–88]    | 0.150              | 0.080 | 0.220 | [76,89] |
| Overweight    | 33.473% <sup>#</sup>           | -       | -       | [1,2]     | 343            | 129    | [86,88]    | 0.000              | 0.000 | 0.000 | [90]    |
| Obesity       | 37.391% <sup>#</sup>           | -       | -       | [1,2]     | 916            | 344    | [86,88]    | 0.012              | 0.001 | 0.022 | [90]    |

SD: standard deviation, NASH: non-alcoholic steatohepatitis, HCC: hepatocellular carcinoma, CHD: coronary heart disease, T2D: type 2 diabetes. CHD, T2D, overweight, and obesity prevalence are not varied in the sensitivity analyses.  
<sup>#</sup> Age, sex and/or ethnicity specific values are specified in the online supplement.

**Table 2.** Selected model input parameter values and ranges.

| Parameter                                             | Mean                 | Min        | Max        | Source        |
|-------------------------------------------------------|----------------------|------------|------------|---------------|
| <b>Initialization</b>                                 |                      |            |            |               |
| Age distribution                                      | OS1*                 | -          | -          | [91]          |
| Sex distribution                                      | OS2**                | -          | -          | [91]          |
| Ethnicity distribution                                | OS3***               | -          | -          | [91]          |
| High sugar consumption                                | 57.278% <sup>#</sup> | 38.186%    | 85.917%    | [3,35,42]     |
| <b>Baseline transition probabilities<sup>##</sup></b> | <b>Mean chance</b>   | <b>Min</b> | <b>Max</b> | <b>Source</b> |
| Non-NAFLD -> steatosis                                | 0.0100               | 0.006700   | 0.01500    | [92–100]      |
| Non-NAFLD -> NASH                                     | 0.0003               | 0.000201   | 0.00045    | [92–100]      |
| Steatosis -> NASH                                     | 0.0060               | 0.004020   | 0.00900    | [92–100]      |
| Steatosis -> cirrhosis                                | 0.0002               | 0.000134   | 0.00030    | [92–100]      |
| NASH -> cirrhosis                                     | 0.0020               | 0.001340   | 0.00300    | [92–100]      |
| NASH -> HCC                                           | 0.0001 <sup>#</sup>  | 0.000067   | 0.00015    | [92–103]      |
| NASH -> liver death                                   | 0.0038               | 0.002546   | 0.00570    | [104–107]     |
| Cirrhosis -> HCC                                      | 0.0200 <sup>#</sup>  | 0.013400   | 0.03000    | [92–103]      |
| Cirrhosis -> liver death                              | 0.0340               | 0.022780   | 0.05100    | [104–107]     |
| HCC -> liver death                                    | 0.5000               | 0.335000   | 0.75000    | [104–107]     |
| Non-CHD -> CHD                                        | 0.0045 <sup>#</sup>  | 0.003015   | 0.00675    | [108,109]     |
| CHD -> CHD death                                      | 0.0100 <sup>#</sup>  | 0.006700   | 0.01500    | [5,6,108]     |
| Non-T2D -> T2D                                        | 0.0045 <sup>#</sup>  | 0.003015   | 0.00675    | [72,110]      |
| T2D -> T2D death                                      | 0.0100 <sup>#</sup>  | 0.006700   | 0.01500    | [6,72,110]    |

|                                                             |                     |            |            |               |
|-------------------------------------------------------------|---------------------|------------|------------|---------------|
| Healthy weight -> overweight                                | 0.0500              | 0.033500   | 0.07500    | [111–114]     |
| Healthy weight -> obese                                     | 0.0060              | 0.004020   | 0.00900    | [111–114]     |
| Overweight -> obese                                         | 0.0180              | 0.012060   | 0.02700    | [111–114]     |
| Each alive state -> non-disease related death               | 0.0100 <sup>#</sup> | 0.006700   | 0.01500    | [6]           |
| <b>Risk factors (odds ratios)</b>                           |                     |            |            |               |
|                                                             | <b>Mean value</b>   | <b>Min</b> | <b>Max</b> | <b>Source</b> |
| NHB ethnicity for progression within NAFLD                  | 0.93                | 0.70       | 1.00       | [115]         |
| Hispanic ethnicity for progression within NAFLD             | 1.67                | 1.22       | 2.22       | [115]         |
| Overweight for progression within NAFLD                     | 2.19                | 1.60       | 3.38       | [93,116–121]  |
| Obesity for progression within NAFLD                        | 3.14                | 2.07       | 5.28       | [93,116–121]  |
| High sugar consumption for progression within NAFLD         | 2.00                | 1.50       | 3.00       | [38,122]      |
| NAFLD for TP non-CHD -> CHD                                 | 2.31                | 1.66       | 3.62       | [123–127]     |
| Overweight for TP non-CHD -> CHD                            | 1.22                | 1.12       | 1.32       | [128–135]     |
| Obesity for TP non-CHD -> CHD                               | 1.60                | 1.43       | 1.79       | [128–135]     |
| T2D for TP non-CHD -> CHD                                   | 2.24                | 1.64       | 3.06       | [136]         |
| NAFLD for TP non-T2D -> T2D                                 | 2.73                | 1.87       | 4.46       | [137–143]     |
| Overweight for TP non-T2D -> T2D                            | 2.18                | 1.59       | 3.36       | [144–150]     |
| Obesity for TP non-T2D -> T2D                               | 3.36                | 2.18       | 5.72       | [144–150]     |
| NAFLD for progression within the BMI chain                  | 2.19                | 1.60       | 3.38       | [93,116–121]  |
| High sugar consumption for progression within the BMI chain | 2.60                | 1.20       | 6.00       | [149,150]     |

SD: standard deviation, NAFLD: non-alcoholic fatty liver disease (steatosis, NASH & cirrhosis), NASH: non-alcoholic steatohepatitis, HCC: hepatocellular carcinoma, CHD: coronary heart disease, T2D: type 2 diabetes, NHB: non-Hispanic black.

\* See online supplement table 1. \*\* See online supplement table 2. \*\*\* See online supplement table 3.

# Age, sex and/or ethnicity specific values are specified in the online supplement.

## Transition probabilities for regression to less severe disease are specified in the online supplement.

#### Calibration

Incidence, prevalence, mortality and costs of overweight and obesity, T2D, and CHD were calibrated to reflect historic data from the CDC and projections from the American Heart Association (AHA) and several individual studies predicting future disease.[6,7,151–155] NASH- and cirrhosis-related HCC incidence and mortality was calibrated to historic trends reported by the CDC, and future predictions reported by the American Cancer Association.[6,156]

#### Validation

Validation of the model occurred via face validation, cross-validation, and sensitivity analyses. Face validation was performed manually by the authors. Each chain was checked separately for functionality before merging them. Cross-validation was performed by comparing epidemiological outcomes and predictions from our model with reported results from different studies on each subject, as presented in the Discussion.

Uncertainty was assessed using deterministic and probabilistic sensitivity analysis (DSA & PSA). DSA was conducted using a five-point analysis, with the minima and maxima specified in **tables 1 and 2**. If a mean and standard deviation (SD) are specified, we used a range of mean  $\pm$  1.96\*SD. DSA results are only presented for the two main outcomes: total costs and DALYs averted in the year 2035. PSA was conducted using the distributions defined in **tables 1 and 2**, to produce a mean and 95% central coverage interval for all outcome values by running the simulation 10,000 times (each of which including the base case and two interventions).

#### Cohort simulation

To produce stable results, limit computational requirements, and have a cohort that remained representative of the U.S. population, we simulated a base cohort of 22,400 people, with new entry of 416 people each year, reflecting CDC population prospects.[69] Because of computational requirements, the model was built in Golang programming language (Google Inc, Mountain View, CA). Model code is publicly available via <https://github.com/alexgoodell/go-mdism> or can be acquired through the corresponding author. Sensitivity analyses were conducted using a 20-machine cluster (Amazon Web Services, Seattle, WA). Outcome analysis was completed in Excel 2010 (Microsoft, Redmond, WA).

## Results

### Incidence and mortality

The incidence of T2D, CHD, and HCC and the corresponding death rates in the year 2035 are stated in **table 3**. Diabetes incidence is expected to rise over the next 20 years, resulting in an incidence rate of 1035 cases per 100,000 people. The interventions are expected to reduce this by 19.9 and 83.5 respectively. CHD incidence is expected to rise to 665 cases per 100,000 people by 2035. This can be reduced by 9.4 and 39 cases by the 20% and the 50% intervention respectively. NASH- or cirrhosis-related HCC incidence will rise to 4.4 cases per 100,000 people. Interventions could reduce this amount by 0.3 and 1.3 respectively. Liver death can be due to HCC, or it can be related to NASH or cirrhosis in the absence of HCC. Liver-

related deaths will rise substantially, to 19.8 deaths per 100,000 people by 2035. This can be reduced by 1.4 or 5.8 deaths per 100,000 people by the 20% and 50% intervention, respectively.

**Table 3.** Annual occurring and averted events in 2035

| Per 100,000 people |                        |                        |                  |                     |                  |
|--------------------|------------------------|------------------------|------------------|---------------------|------------------|
| Events             | No intervention (CI)   | 20% red. (CI)          | Difference (CI)  | 50% red. (CI)       | Difference (CI)  |
| T2D cases          | 1034.6 (1031.0-1038.2) | 1014.7 (1011.3-1018.2) | 19.9 (12.8-27.0) | 951.2 (947.9-954.4) | 83.5 (76.7-90.3) |
| T2D deaths         | 576.6 (574.2-578.9)    | 569.3 (567.0-571.6)    | 7.2 (2.7-11.8)   | 546.4 (544.2-548.6) | 30.2 (25.7-34.6) |
| CHD cases          | 665.1 (661.9-668.2)    | 655.6 (652.5-658.8)    | 9.4 (3.1-15.8)   | 626.1 (623.1-629.1) | 39.0 (32.8-45.2) |
| CHD deaths         | 203.6 (202.2-205.0)    | 201.9 (200.5-203.3)    | 1.6 (-1.2-4.4)   | 197.2 (195.9-198.6) | 6.3 (3.6-9.1)    |
| HCC cases          | 4.4 (4.32-4.41)        | 4.0 (3.95-4.05)        | 0.3 (0.24-0.39)  | 3.1 (3.02-3.18)     | 1.3 (1.24-1.38)  |
| Liver deaths       | 19.8 (19.65-20.02)     | 18.5 (18.29-18.63)     | 1.4 (1.02-1.73)  | 14.1 (13.94-14.21)  | 5.8 (5.44-6.08)  |

*NASH: non-alcoholic steatohepatitis; HCC: hepatocellular carcinoma; CHD: coronary heart disease; T2D: type 2 diabetes mellitus; CI: 95% central coverage interval. Numbers might not add up due to rounding.*

#### Prevalence

**Figure 2**, graphs A-H show the reduction in prevalence of disease due to the two intervention strategies. A 20% reduction in added sugars consumption is expected to decrease prevalence of each disease state significantly after 20 years, except for overweight prevalence, which does not change significantly. A 50% reduction in added sugars consumption will proportionally affect prevalence. Effects on T2D and CHD prevalences start to accumulate after an initial 3-year lag period. Graph G shows that overweight prevalence is not reduced. This is because the individuals that regressed from obese to overweight offset the reduction achieved in people that started overweight and regressed to normal weight. This effect is clarified by the drop in obesity prevalence.

#### Figure 2

#### Costs & DALYs

An overview of economic findings is presented in **table 4**. Overall costs for the modeled disease states could be reduced by 2.26% (95% CI 2.23% — 2.29%) by the year 2035 with an intervention that reduces added sugars intake by 20%. The 50% intervention will reduce overall costs by 6.99% (95% CI: 6.91 — 7.08). DALY burden and averted DALYs are presented in **table 5**. Total amount of DALYs could be reduced by 4.32% (95% CI: 4.27% — 4.38%) or 13.37% (95% CI: 13.24% — 13.51%) respectively. The majority of averted DALYs are due to reduced mortality.

**Table 4.** Annual costs spent and averted per disease state in 2035

| In billions 2015 USD, discounted by 3.0% annually |                            |                            |                         |                            |                         |
|---------------------------------------------------|----------------------------|----------------------------|-------------------------|----------------------------|-------------------------|
| State                                             | No intervention (CI)       | 20% reduction (CI)         | Difference (CI)         | 50% reduction (CI)         | Difference (CI)         |
| Steatosis                                         | 6.48 (6.43-6.53)           | 6.40 (6.35-6.45)           | 0.08 (0.080-0.082)      | 6.23 (6.18-6.28)           | 0.25 (0.248-0.255)      |
| NASH                                              | 5.26 (5.22-5.30)           | 4.89 (4.85-4.93)           | 0.37 (0.368-0.375)      | 4.11 (4.08-4.14)           | 1.15 (1.139-1.162)      |
| Cirrhosis                                         | 7.00 (6.93-7.07)           | 6.22 (6.16-6.28)           | 0.78 (0.772-0.791)      | 4.60 (4.56-4.65)           | 2.40 (2.371-2.429)      |
| HCC                                               | 5.10 (5.04-5.16)           | 4.55 (4.50-4.60)           | 0.55 (0.537-0.558)      | 3.40 (3.36-3.44)           | 1.70 (1.669-1.721)      |
| CHD                                               | 162.2 (160.9-163.6)        | 160.1 (158.8-161.5)        | 2.09 (2.06-2.12)        | 155.7 (154.4-157.0)        | 6.51 (6.43-6.58)        |
| T2D                                               | 200.0 (198.4-201.6)        | 195.9 (194.3-197.5)        | 4.07 (4.02-4.12)        | 187.4 (185.9-188.9)        | 12.59 (12.46-12.73)     |
| Overweight                                        | 16.4 (16.3-16.5)           | 16.6 (16.5-16.8)           | -0.25 (-0.26 - -0.25)   | 17.2 (17.1-17.3)           | -0.79 (-0.81 - -0.78)   |
| Obesity                                           | 52.7 (52.3-53.1)           | 50.1 (49.7-50.5)           | 2.59 (2.57-2.62)        | 44.7 (44.3-45.0)           | 8.03 (7.95-8.12)        |
| <b>Total</b>                                      | <b>455.1 (451.4-458.9)</b> | <b>444.9 (441.2-448.5)</b> | <b>10.3 (10.2-10.4)</b> | <b>423.3 (419.8-426.8)</b> | <b>31.8 (31.5-32.2)</b> |

*NASH: non-alcoholic steatohepatitis; HCC: hepatocellular carcinoma; CHD: coronary heart disease; T2D: type 2 diabetes mellitus; CI: 95% central coverage interval. Numbers might not add up due to rounding.*

**Table 5.** Annual occurring and averted DALYs in 2035

| In millions |                      |                    |                     |                    |                     |
|-------------|----------------------|--------------------|---------------------|--------------------|---------------------|
| State       | No intervention (CI) | 20% reduction (CI) | Difference (CI)     | 50% reduction (CI) | Difference (CI)     |
| NASH        | 2.97 (2.955-2.988)   | 2.76 (2.746-2.777) | 0.210 (0.209-0.212) | 2.32 (2.309-2.334) | 0.650 (0.645-0.655) |
| Cirrhosis   | 0.48 (0.475-0.482)   | 0.42 (0.422-0.428) | 0.053 (0.053-0.054) | 0.31 (0.312-0.316) | 0.164 (0.162-0.165) |
| HCC         | 3.06 (3.046-3.084)   | 2.78 (2.765-2.799) | 0.283 (0.279-0.283) | 2.19 (2.180-2.206) | 0.872 (0.863-0.881) |
| CHD         | 2.32 (2.305-2.330)   | 2.29 (2.276-2.302) | 0.028 (0.028-0.029) | 2.23 (2.217-2.242) | 0.088 (0.086-0.090) |
| T2D         | 8.21 (8.180-8.248)   | 8.06 (8.023-8.089) | 0.158 (0.155-0.160) | 7.72 (7.690-7.752) | 0.492 (0.487-0.498) |

|                |                            |                            |                            |                            |                            |
|----------------|----------------------------|----------------------------|----------------------------|----------------------------|----------------------------|
| Obesity        | 0.69 (0.689-0.700)         | 0.66 (0.655-0.666)         | 0.034 (0.034-0.035)        | 0.59 (0.584-0.593)         | 0.106 (0.105-0.107)        |
| <b>Total</b>   | <b>17.74 (17.65-17.83)</b> | <b>16.97 (16.89-17.06)</b> | <b>0.767 (0.757-0.777)</b> | <b>15.37 (15.29-15.44)</b> | <b>2.372 (2.348-2.396)</b> |
| From mortality | 11.94                      | 11.50                      | 0.439                      | 10.58                      | 1.357                      |
| From morbidity | 5.80                       | 5.47                       | 0.328                      | 4.78                       | 1.015                      |

NASH: non-alcoholic steatohepatitis; HCC: hepatocellular carcinoma; CHD: coronary heart disease; T2D: type 2 diabetes mellitus; CI: 95% central coverage interval. Numbers might not add up due to rounding.

#### Sensitivity analyses

We show tornado diagrams for the two most important outcomes: annual costs and DALYs averted by the year 2035 due to an intervention that reduces sugar consumption by 20%. The diagrams show the impact that specific input parameters had on selected results. The ten variables that caused the widest range in results are shown. When varying individual variables, the annual savings by the year 2035 range from 7.9 to 17.1 billion 2015 USD. The tornado diagram (**Figure 3**) shows that the interaction between high added sugars consumption and the progression within the NAFLD and BMI chains had the greatest impact on total costs averted. In the tornado diagram for total annual DALYs averted by the 20% intervention in the year 2035 (**Figure 4**), assigned disability weights had the greatest impact. Total DALYs averted ranged between 0.36 and 1.41 million.

#### Figure 3&4

### Discussion

It has been estimated that the cost burden of the diseases of metabolic syndrome are 75% of the total annual health care budget (\$3.2 trillion) of the United States. The clinical burden of NAFLD alone is estimated at \$103 billion.[157] The proposed model shows clear and significant benefits for interventions that reduce consumption of added sugars. A reduction by 20% will reduce annual direct medical costs for U.S. adults by more than 10 billion USD (2015 dollars) by the year 2035. A 50% reduction will save an additional 21 billion. Together with these economic benefits, population health will significantly improve. A total of 770,000 DALYs could be averted with a 20% reduction in consumption. A 50% reduction in consumption will avert another 1.6 million DALYs. These health and economic benefits are the direct result of lower incidence, prevalence, and mortality of disease in U.S. adults due to lower consumption of added sugars. Averted costs are achieved primarily through reduced costs for CHD, T2D, overweight, and obesity. This is mainly because costs for the most prevalent NAFLD states, namely steatosis and NASH, are fairly low, whereas costs for other illnesses are much higher (Table 1). In averted DALYs, we find that the combination of disability weight and prevalence changes are predictors of DALY reductions. E.g. NASH has a lower disability weight but higher prevalence reductions and therefore we find almost equal DALY reductions compared to HCC or CHD. T2D has the highest reduction in DALY burden because it has relatively large values for both prevalence reduction and disability weight.

#### Fit with current knowledge

The estimate for health and economic benefit of this model is similar to a number of previously performed economic evaluations. Basu et al. found a reduction in diabetes incidence of 21.7 cases per 100,000 people with a reduction of 20% of added sugars through a cap and trade approach, limiting the amount of sugars in the food supply.[65] We found a reduction of 19.9 cases per 100,000 people, indicating a similar absolute effect size. CHD incidence reduction is estimated to be about 1.5-fold higher than found in a similar study, but we argue that this is mainly because the other study simulated a 20% tax on sugar-sweetened beverages, and therefore the overall added sugars consumption reduction was smaller than the 20% reduction we simulated.[63] In an econometric analysis looking backward in time, Basu et al. found a delay of 3 years between changes in sugar consumption and prevalence of diabetes.[37] Similarly, we found a delay of 3 years going forward in time between reduction of consumption and reduction in prevalence of disease. Prevalence of obesity has been reported to drop by 1.5% — 10% due to a reduction of added sugars by 10% — 20%.[59–61] Our result of 2.1% reduction in obesity prevalence seems to reflect our conservative approach in determining input parameter values.

Costs savings are bigger in our model compared to other models.[60,64,64] This was for three reasons. First, some other models do not use added sugars as a whole but use SSB's, resulting in a smaller effect. Second, our overall prevalence of T2D and CHD is higher than most other models. We have calibrated our model to historic trends reported by the CDC and to future projections of the AHA, ADA and separate studies predicting future prevalence, and therefore argue that our estimate is valid. Third, and perhaps most importantly, no other studies predict future NAFLD prevalence. We present the first model that estimates the effects of sugar interventions on NAFLD prevalence and associated costs and DALYs.

In 2009, the American Heart Association recommended a reduction in added sugar consumption from a median of 90 grams per day to a maximum of 25 grams for women and 37.5 grams for men.[31] In 2016, the USDA and WHO settled on an upper limit of 10% of calories, which approximates 50 grams per day. Given the U.S. current median consumption of 80 grams per day, our microsimulation modeling cutoffs of 20% and 50%, while ambitious, are metabolically rational and in

concert with governmental goals.[158]

Our model only allows us to examine the negative side of the balance sheet in terms of cost savings to health care. However, reductions in added sugar consumption have been modeled to provide significant increases to the positive side of the balance sheet in terms of economic productivity. Indeed, a simulation modeling by Morgan Stanley predicted economic growth to decline to zero by the year 2035 using a high-sugar case, whereas stabilization at +2.9% was noted with a low-sugar case.[159]

#### *Strengths and limitations*

This study is the first of its kind to model the effect of added sugars on NAFLD as well as on BMI, and therefore it captures a more complete picture of the possible health and economic benefits of interventions that reduce intake of added sugars. Though taxing sugar-sweetened products, mainly beverages, has been widely suggested as a public health strategy, other approaches, e.g. a cap and trade approach, have also been suggested.[58–61,63–65] We have constructed this model to be applicable with each of these interventions, so that it does not rely on any consumption statistics other than added sugars as a whole. A limitation to this approach is that our model does not incorporate a possible change to non-sugared caloric products, containing protein, fat, or other carbohydrates. While it is conceivable that removal of added sugars in the diet could result in subsequent substitution of other foodstuffs to restore an individual's caloric baseline, *ad lib* population studies do not support that such caloric compensation takes place.[160] It is important that effort is put into investigating self- and cross-elasticity of sugar-sweetened products to determine the effect of these caloric replacements. Though this is a limitation, research has clearly shown that the contribution of added sugars in relation to their excessive intake is likely the most important consumption factor for metabolic derangement. Furthermore, added sugars consumption was fixed throughout the simulation for each individual (though specified per sex and ethnic group). We could not find sufficient data on changes in sugar consumption related to incident disease and therefore could not model these changes accurately enough. We argue that keeping the sugar consumption fixed is likely more accurate than modeling changing sugar consumption based solely on age. The main limitation of this model is the uncertainty of input parameters. The pathophysiology of NAFLD and its associations with other metabolic diseases is still widely under investigation. We have modeled cirrhosis as an irreversible condition, which is not necessarily true in all cases. Furthermore, the input parameters for baseline transition probabilities and interaction (OR) values are still somewhat uncertain. Many studies report associations, but very few studies report plausible quantitative causal relationships. There are several reasons that explain this low number of studies. First, it is hard to accurately determine the individual components in an individual's diet. Second, there is no inexpensive, accurate way to determine the presence of individual NAFLD states. Commonly used ultrasonography possibly underestimates the prevalence of NAFLD and does not differentiate between steatosis and NASH, while up to 79% of patients may have serum alanine aminotransferase (ALT) levels within the normal reference range of < 40 U/mL.[9,161] Additionally, the studies that we included to define our input parameters are generally not a perfect reflection of the population that we modeled, which may lead to imperfect estimates of values. We have addressed these uncertainties in inputs by taking wide ranges in the probabilistic sensitivity analysis, which determines the SD and 95% central coverage interval around the results. Results remain statistically significant, indicating that any minor inaccuracies in input parameter values will not render the effects insignificant. Ultimately, it is desirable to determine incidence of NAFLD states and risk factor relative risks in independent prospective cohort studies, and to assess intervention effectiveness via randomized controlled trials. This model can be refined and updated when new data become available.

It is possible that our results might still underestimate the total effects. We only modeled diagnosed disease, we took a conservative approach when determining input parameter values, and we did not take societal costs into account. Real health, healthcare, and economic benefits are likely larger than estimated. Furthermore, we only modeled the population with an age over 20. Likely, including health effects in children, particularly those with type 2 diabetes, would yield additional benefits.

#### *Implications*

This model clarifies the significant health and economic benefits that could be achieved by a public health intervention that reduces consumption of added sugars in U.S. adults. We recommend that health policy makers review options to implement sugar reduction. Important to consider are the barriers to limiting added sugars in the United States. The food industry uses sugar to enhance flavor and as a bulking and browning agent, humectant, and spoilage retardant. Another obstacle is the lowered price for manufacturing, due to government subsidies for corn, cane, and beets. Historically there was another barrier -- lack of consensus on the link between sugar and metabolic disease. However, consensus on causality is now strong.[162] Recently sugar taxation has emerged as a viable strategy, levied in the U.K. and Mexico, as well as several municipalities in the U.S., including San Francisco, Oakland, Berkeley, and Albany, CA, as well as Chicago, IL and Philadelphia, PA.

#### *Future research*

Future research should focus on establishing a more precise measurement of NAFLD prevalence, incidence, and risk factors. Furthermore, magnitude and effects of switching to different food groups should be assessed. Finally, changes in added sugars consumption related to ageing and incident disease should be more intensively investigated.

### Contributor statement

RAV was involved in conceptualizing the study, reviewing literature, conducting the modelling analysis, analyzing the data and writing the manuscript. AJG was involved in conducting the modelling analysis and in editing the paper. LAR and RHL were involved in conceptualizing the model, providing and structuring data inputs and editing the manuscript. TCP was involved in reviewing and revising the manuscript, checking statistical and mathematical assumptions and establishing overall validity of the model. JGK was involved in conceptualization of the model, input data review, guiding the modelling process and providing a critical review of the manuscript. All authors read and approved the final manuscript.

### Competing interests

The authors declare no direct conflicts of interest. However, Dr. Lustig has received author fees from Hudson Street Press regarding his authorship of: "Fat Chance: Beating the Odds Against Sugar, Processed Food, Obesity, and Disease"; "The Fat Chance Cookbook"; and "Sugar has 56 names: A Shopper's Guide". He is also the unpaid chief science officer of the non-profit EatREAL.

### Financial support

No financial support was provided for this study.

### Data sharing statement

An online supplement will be made available containing comprehensive tables of used input data. The modelling code is available through github: <https://github.com/alexgoodell/go-mdism> or can be accessed via the corresponding author.

### Figure legends

#### Figure 1. Model state and covariate structure.

Each individual gets assigned a state in each chain at the start of the simulation and their specific covariates (age, sex, ethnicity, high/low sugar consumption). Circles represent disease states. Solid lines indicate a possible transition pathway between states. Coloured lines indicate how being in a state within one chain can affect the value of the transition probability between two states in another chain. These are split into three categories: pink striped lines indicate the effect of NAFLD on progression in the BMI, T2D and CHD chains. Blue dotted lines indicate the effect of overweight and obesity on progression in the NAFLD, T2D and CHD chains. The green dotted line indicates the effect of T2D on progression in the CHD chain. 3 chains contain disease related deaths and the model contains a non-disease related death state for other causes of mortality. The states of individuals are updated every cycle (i.e. annually) for 20 years. Each cycle the state distributions and their related costs and DALYs are generated as output.

NAFLD: non-alcoholic fatty liver disease, T2D: type 2 diabetes, CHD: coronary heart disease, NASH: non-alcoholic steatohepatitis, HCC: hepatocellular carcinoma, DALYs: disability-adjusted life years.

#### Figure 2, graphs A to H.

Reduction in population prevalence of disease due to interventions. Lines represent mean values +/- one standard deviation. 0% is the baseline, representing no intervention. The blue lines with diamonds indicate a reduction of added sugar of 20%. The red lines with crosses represent a reduction of 50%. NASH; non-alcoholic steatohepatitis.

#### Figure 3. Tornado diagram of the ten most critical variables on total costs averted in the year 2035.

#### Figure 4. Tornado diagram of the ten most critical variables on total DALYs averted in the year 2035.

### References

- 1 Flegal KM, Kruszon-Moran D, Carroll MD, *et al*. Trends in Obesity Among Adults in the United States, 2005 to 2014. *JAMA* 2016;**315**:2284–91. doi:10.1001/jama.2016.6458
- 2 Centers for Disease Control and Prevention. National Center for Health Statistics. Health Data Interactive. Accessed at [www.cdc.gov/nchs/hdi.htm](http://www.cdc.gov/nchs/hdi.htm) on Apr 23, 2015.
- 3 Centers for Disease Control and Prevention. National Center for Health Statistics. National Health and Nutrition Examination Survey Data. Hyattsville, MD: U.S. Department of Health and Human Services, Centers for Disease Control and Prevention. 2005–2012. <http://www.cdc.gov/nchs/nhanes.htm>.
- 4 American Heart Association. *Heart Disease and Stroke Statistics — 2005 Update*. Dallas, Texas.: American Heart Association; 2005.

- 1  
2  
3 5 Mozaffarian D, Benjamin EJ, Go AS, *et al.* Heart disease and stroke statistics--2015 update: a  
4 report from the American Heart Association. *Circulation* 2015;**131**:e29-322.  
5 doi:10.1161/CIR.000000000000152  
6
- 7 6 Centers for Disease Control and Prevention. National Center for Health Statistics. Underlying  
8 Cause of Death 1999-2013 on CDC WONDER Online Database, released 2015. Data are from the  
9 Multiple Cause of Death Files, 1999-2013, as compiled from data provided by the 57 vital  
10 statistics jurisdictions through the Vital Statistics Cooperative Program. Accessed at  
11 <http://wonder.cdc.gov/ucd-icd10.html> on Apr 16, 2015.  
12
- 13 7 Heidenreich PA, Trogdon JG, Khavjou OA, *et al.* Forecasting the future of cardiovascular disease  
14 in the United States: a policy statement from the American Heart Association. *Circulation*  
15 2011;**123**:933-44. doi:10.1161/CIR.0b013e31820a55f5  
16
- 17 8 American Diabetes Association. Economic costs of diabetes in the U.S. In 2007. *Diabetes Care*  
18 2008;**31**:596-615. doi:10.2337/dc08-9017  
19
- 20 9 Browning JD, Szczepaniak LS, Dobbins R, *et al.* Prevalence of hepatic steatosis in an urban  
21 population in the United States: impact of ethnicity. *Hepatology* 2004;**40**:1387-95.  
22 doi:10.1002/hep.20466  
23
- 24 10 Yki-Järvinen H. Non-alcoholic fatty liver disease as a cause and a consequence of metabolic  
25 syndrome. *Lancet Diabetes Endocrinol* 2014;**2**:901-10. doi:10.1016/S2213-8587(14)70032-4  
26
- 27 11 Lonardo A, Ballestri S, Marchesini G, *et al.* Nonalcoholic fatty liver disease: a precursor of the  
28 metabolic syndrome. *Dig Liver Dis Off J Ital Soc Gastroenterol Ital Assoc Study Liver*  
29 2015;**47**:181-90. doi:10.1016/j.dld.2014.09.020  
30
- 31 12 Ballestri S, Nascimbeni F, Romagnoli D, *et al.* The independent predictors of non-alcoholic  
32 steatohepatitis and its individual histological features.: Insulin resistance, serum uric acid,  
33 metabolic syndrome, alanine aminotransferase and serum total cholesterol are a clue to  
34 pathogenesis and candidate targets for treatment. *Hepatology Res Off J Jpn Soc Hepatol*  
35 2016;**46**:1074-87. doi:10.1111/hepr.12656  
36
- 37 13 Chalasani N, Younossi Z, Lavine JE, *et al.* The diagnosis and management of non-alcoholic fatty  
38 liver disease: practice guideline by the American Gastroenterological Association, American  
39 Association for the Study of Liver Diseases, and American College of Gastroenterology.  
40 *Gastroenterology* 2012;**142**:1592-609. doi:10.1053/j.gastro.2012.04.001  
41
- 42 14 Tiniakos DG. Nonalcoholic fatty liver disease/nonalcoholic steatohepatitis: histological  
43 diagnostic criteria and scoring systems. *Eur J Gastroenterol Hepatol* 2010;**22**:643-50.  
44 doi:10.1097/MEG.0b013e32832ca0cb  
45
- 46 15 Farazi PA, DePinho RA. Hepatocellular carcinoma pathogenesis: from genes to environment.  
47 *Nat Rev Cancer* 2006;**6**:674-87. doi:10.1038/nrc1934  
48
- 49 16 Wree A, Broderick L, Canbay A, *et al.* From NAFLD to NASH to cirrhosis-new insights into  
50 disease mechanisms. *Nat Rev Gastroenterol Hepatol* 2013;**10**:627-36.  
51 doi:10.1038/nrgastro.2013.149  
52
- 53 17 Mahady SE, George J. Management of nonalcoholic steatohepatitis: an evidence-based  
54 approach. *Clin Liver Dis* 2012;**16**:631-45. doi:10.1016/j.cld.2012.05.003  
55  
56  
57  
58  
59  
60

- 1  
2  
3 18 Review Team, LaBrecque DR, Abbas Z, *et al.* World Gastroenterology Organisation global  
4 guidelines: Nonalcoholic fatty liver disease and nonalcoholic steatohepatitis. *J Clin*  
5 *Gastroenterol* 2014;**48**:467–73. doi:10.1097/MCG.000000000000116  
6  
7 19 Williams CD, Stengel J, Asike MI, *et al.* Prevalence of nonalcoholic fatty liver disease and  
8 nonalcoholic steatohepatitis among a largely middle-aged population utilizing ultrasound and  
9 liver biopsy: a prospective study. *Gastroenterology* 2011;**140**:124–31.  
10 doi:10.1053/j.gastro.2010.09.038  
11  
12 20 Peery AF, Dellon ES, Lund J, *et al.* Burden of gastrointestinal disease in the United States: 2012  
13 update. *Gastroenterology* 2012;**143**:1179–1187.e1-3. doi:10.1053/j.gastro.2012.08.002  
14  
15 21 Gastaldelli A, Cusi K, Pettiti M, *et al.* Relationship between hepatic/visceral fat and hepatic  
16 insulin resistance in nondiabetic and type 2 diabetic subjects. *Gastroenterology* 2007;**133**:496–  
17 506. doi:10.1053/j.gastro.2007.04.068  
18  
19 22 Dietrich P, Hellerbrand C. Non-alcoholic fatty liver disease, obesity and the metabolic  
20 syndrome. *Best Pract Res Clin Gastroenterol* 2014;**28**:637–53. doi:10.1016/j.bpg.2014.07.008  
21  
22 23 Fukuda T, Hamaguchi M, Kojima T, *et al.* The impact of non-alcoholic fatty liver disease on  
23 incident type 2 diabetes mellitus in non-overweight individuals. *Liver Int Off J Int Assoc Study*  
24 *Liver* 2016;**36**:275–83. doi:10.1111/liv.12912  
25  
26 24 Sattar N, McConnachie A, Ford I, *et al.* Serial metabolic measurements and conversion to type 2  
27 diabetes in the west of Scotland coronary prevention study: specific elevations in alanine  
28 aminotransferase and triglycerides suggest hepatic fat accumulation as a potential contributing  
29 factor. *Diabetes* 2007;**56**:984–91. doi:10.2337/db06-1256  
30  
31 25 Thomas EL, Brynes AE, Hamilton G, *et al.* Effect of nutritional counselling on hepatic, muscle  
32 and adipose tissue fat content and distribution in non-alcoholic fatty liver disease. *World J*  
33 *Gastroenterol* 2006;**12**:5813–9.  
34  
35 26 Vanni E, Bugianesi E, Kotronen A, *et al.* From the metabolic syndrome to NAFLD or vice versa?  
36 *Dig Liver Dis Off J Ital Soc Gastroenterol Ital Assoc Study Liver* 2010;**42**:320–30.  
37 doi:10.1016/j.dld.2010.01.016  
38  
39 27 Larson-Meyer DE, Heilbronn LK, Redman LM, *et al.* Effect of calorie restriction with or without  
40 exercise on insulin sensitivity, beta-cell function, fat cell size, and ectopic lipid in overweight  
41 subjects. *Diabetes Care* 2006;**29**:1337–44. doi:10.2337/dc05-2565  
42  
43 28 Marriott BP, Cole N, Lee E. National estimates of dietary fructose intake increased from 1977 to  
44 2004 in the United States. *J Nutr* 2009;**139**:1228S–1235S. doi:10.3945/jn.108.098277  
45  
46 29 Wang DD, Leung CW, Li Y, *et al.* Trends in dietary quality among adults in the United States,  
47 1999 through 2010. *JAMA Intern Med* 2014;**174**:1587–95.  
48 doi:10.1001/jamainternmed.2014.3422  
49  
50 30 Welsh JA, Sharma AJ, Grellinger L, *et al.* Consumption of added sugars is decreasing in the  
51 United States. *Am J Clin Nutr* 2011;**94**:726–34. doi:10.3945/ajcn.111.018366  
52  
53 31 Johnson RK, Appel LJ, Brands M, *et al.* Dietary sugars intake and cardiovascular health: a  
54 scientific statement from the American Heart Association. *Circulation* 2009;**120**:1011–20.  
55 doi:10.1161/CIRCULATIONAHA.109.192627  
56  
57  
58  
59  
60

- 1  
2  
3 32 U.S. Dept. of Agriculture. HHS and USDA release new dietary guidelines to encourage healthy  
4 eating patterns to prevent chronic diseases. USDA Press, Report 202-720-4623.  
5 <https://www.fns.usda.gov/pressrelease/2016/000516>.  
6
- 7 33 EFSA Panel on Dietetic Products N and Allergies (NDA). Scientific Opinion on Dietary Reference  
8 Values for carbohydrates and dietary fibre. *EFSA J* 2010;**8**:1462. doi:10.2903/j.efsa.2010.1462  
9
- 10 34 Vos MB, Kaar JL, Welsh JA, *et al*. Added Sugars and Cardiovascular Disease Risk in Children: A  
11 Scientific Statement From the American Heart Association. *Circulation* 2017;**135**:e1017–34.  
12 doi:10.1161/CIR.0000000000000439  
13
- 14 35 Rodríguez LA, Madsen KA, Cotterman C, *et al*. Added sugar intake and metabolic syndrome in  
15 US adolescents: cross-sectional analysis of the National Health and Nutrition Examination  
16 Survey 2005–2012. *Public Health Nutr* 2016;**19**:2424–34. doi:10.1017/S1368980016000057  
17
- 18 36 Yang Q, Zhang Z, Gregg EW, *et al*. Added sugar intake and cardiovascular diseases mortality  
19 among US adults. *JAMA Intern Med* 2014;**174**:516–24. doi:10.1001/jamainternmed.2013.13563  
20
- 21 37 Basu S, Yoffe P, Hills N, *et al*. The relationship of sugar to population-level diabetes prevalence:  
22 an econometric analysis of repeated cross-sectional data. *PLoS One* 2013;**8**:e57873.  
23 doi:10.1371/journal.pone.0057873  
24
- 25 38 Abid A, Taha O, Nseir W, *et al*. Soft drink consumption is associated with fatty liver disease  
26 independent of metabolic syndrome. *J Hepatol* 2009;**51**:918–24.  
27 doi:10.1016/j.jhep.2009.05.033  
28
- 29 39 Lustig RH. Fructose: it's "alcohol without the buzz." *Adv Nutr Bethesda Md* 2013;**4**:226–35.  
30 doi:10.3945/an.112.002998  
31
- 32 40 Lustig RH, Mulligan K, Noworolski SM, *et al*. Isocaloric fructose restriction and metabolic  
33 improvement in children with obesity and metabolic syndrome. *Obes Silver Spring Md*  
34 2016;**24**:453–60. doi:10.1002/oby.21371  
35
- 36 41 Schwarz J-M, Noworolski SM, Wen MJ, *et al*. Effect of a High-Fructose Weight-Maintaining Diet  
37 on Lipogenesis and Liver Fat. *J Clin Endocrinol Metab* 2015;**100**:2434–42. doi:10.1210/jc.2014-  
38 3678  
39
- 40 42 Imamura F, O'Connor L, Ye Z, *et al*. Consumption of sugar sweetened beverages, artificially  
41 sweetened beverages, and fruit juice and incidence of type 2 diabetes: systematic review,  
42 meta-analysis, and estimation of population attributable fraction. *BMJ* 2015;**351**:h3576.  
43
- 44 43 Bray GA, Popkin BM. Dietary sugar and body weight: have we reached a crisis in the epidemic  
45 of obesity and diabetes?: health be damned! Pour on the sugar. *Diabetes Care* 2014;**37**:950–6.  
46 doi:10.2337/dc13-2085  
47
- 48 44 Lim JS, Mietus-Snyder M, Valente A, *et al*. The role of fructose in the pathogenesis of NAFLD  
49 and the metabolic syndrome. *Nat Rev Gastroenterol Hepatol* 2010;**7**:251–64.  
50 doi:10.1038/nrgastro.2010.41  
51
- 52 45 Maersk M, Belza A, Stødkilde-Jørgensen H, *et al*. Sucrose-sweetened beverages increase fat  
53 storage in the liver, muscle, and visceral fat depot: a 6-mo randomized intervention study. *Am J*  
54 *Clin Nutr* 2012;**95**:283–9. doi:10.3945/ajcn.111.022533  
55  
56  
57  
58  
59  
60

- 1  
2  
3 46 Stanhope KL, Schwarz JM, Keim NL, *et al.* Consuming fructose-sweetened, not glucose-  
4 sweetened, beverages increases visceral adiposity and lipids and decreases insulin sensitivity in  
5 overweight/obese humans. *J Clin Invest* 2009;**119**:1322–34. doi:10.1172/JCI37385  
6
- 7 47 Pollock NK, Bundy V, Kanto W, *et al.* Greater fructose consumption is associated with  
8 cardiometabolic risk markers and visceral adiposity in adolescents. *J Nutr* 2012;**142**:251–7.  
9 doi:10.3945/jn.111.150219  
10
- 11 48 Sevastianova K, Santos A, Kotronen A, *et al.* Effect of short-term carbohydrate overfeeding and  
12 long-term weight loss on liver fat in overweight humans. *Am J Clin Nutr* 2012;**96**:727–34.  
13 doi:10.3945/ajcn.112.038695  
14
- 15 49 Nguyen S, Choi HK, Lustig RH, *et al.* Sugar-sweetened beverages, serum uric acid, and blood  
16 pressure in adolescents. *J Pediatr* 2009;**154**:807–13. doi:10.1016/j.jpeds.2009.01.015  
17
- 18 50 Chen L, Caballero B, Mitchell DC, *et al.* Reducing consumption of sugar-sweetened beverages is  
19 associated with reduced blood pressure: a prospective study among United States adults.  
20 *Circulation* 2010;**121**:2398–406. doi:10.1161/CIRCULATIONAHA.109.911164  
21
- 22 51 InterAct Consortium, Romaguera D, Norat T, *et al.* Consumption of sweet beverages and type 2  
23 diabetes incidence in European adults: results from EPIC-InterAct. *Diabetologia* 2013;**56**:1520–  
24 30. doi:10.1007/s00125-013-2899-8  
25
- 26 52 Ballestri S, Zona S, Targher G, *et al.* Nonalcoholic fatty liver disease is associated with an almost  
27 twofold increased risk of incident type 2 diabetes and metabolic syndrome. Evidence from a  
28 systematic review and meta-analysis. *J Gastroenterol Hepatol* 2016;**31**:936–44.  
29 doi:10.1111/jgh.13264  
30
- 31 53 Gugliucci A, Lustig RH, Caccavello R, *et al.* Short-term isocaloric fructose restriction lowers  
32 apoC-III levels and yields less atherogenic lipoprotein profiles in children with obesity and  
33 metabolic syndrome. *Atherosclerosis* 2016;**253**:171–7.  
34 doi:10.1016/j.atherosclerosis.2016.06.048  
35
- 36 54 Schwarz JM, Noworolski SM, Gugliucci A, Jones G, Erkin-Cakmak A, Tai VW, Wen M, Palii SP,  
37 Sinclair E, Korn N, Velasco-Alin M, Lustig RH, Mulligan K: Fructose restriction, liver fat, de novo  
38 lipogenesis, and insulin kinetics in children with obesity. *Gastroenterology* (in press).  
39
- 40 55 Perry RJ, Samuel VT, Petersen KF, *et al.* The role of hepatic lipids in hepatic insulin resistance  
41 and type 2 diabetes. *Nature* 2014;**510**:84–91. doi:10.1038/nature13478  
42
- 43 56 Templeman NM, Skovsø S, Page MM, *et al.* A causal role for hyperinsulinemia in obesity. *J*  
44 *Endocrinol* 2017;**232**:R173–83. doi:10.1530/JOE-16-0449  
45
- 46 57 Jia G, DeMarco VG, Sowers JR. Insulin resistance and hyperinsulinaemia in diabetic  
47 cardiomyopathy. *Nat Rev Endocrinol* 2016;**12**:144–53. doi:10.1038/nrendo.2015.216  
48
- 49 58 Brownell KD, Farley T, Willett WC, *et al.* The public health and economic benefits of taxing  
50 sugar-sweetened beverages. *N Engl J Med* 2009;**361**:1599–605. doi:10.1056/NEJMp0905723  
51
- 52 59 Mytton OT, Eyles H, Ogilvie D. Evaluating the Health Impacts of Food and Beverage Taxes. *Curr*  
53 *Obes Rep* 2014;**3**:432–9. doi:10.1007/s13679-014-0123-x  
54  
55  
56  
57  
58  
59  
60

- 1  
2  
3 60 Wang YC, Coxson P, Shen Y-M, *et al.* A penny-per-ounce tax on sugar-sweetened beverages would cut health and cost burdens of diabetes. *Health Aff Proj Hope* 2012;**31**:199–207. doi:10.1377/hlthaff.2011.0410
- 4  
5  
6  
7 61 Smith TA, Lin B, Lee J. Taxing Caloric Sweetened Beverages: Potential Effects on Beverage Consumption, Calorie Intake, and Obesity, ERR-100, U.S. Department of Agriculture, Economic Research Service, July 2010.
- 8  
9  
10  
11 62 Cochero MA, Rivera-Dommarco J, Popkin BM, *et al.* In Mexico, Evidence Of Sustained Consumer Response Two Years After Implementing A Sugar-Sweetened Beverage Tax. *Health Aff Proj Hope* 2017;**36**:564–71. doi:10.1377/hlthaff.2016.1231
- 12  
13  
14  
15 63 Mekonnen TA, Odden MC, Coxson PG, *et al.* Health benefits of reducing sugar-sweetened beverage intake in high risk populations of California: results from the cardiovascular disease (CVD) policy model. *PloS One* 2013;**8**:e81723. doi:10.1371/journal.pone.0081723
- 16  
17  
18  
19 64 Basu S, Seligman HK, Gardner C, *et al.* Ending SNAP subsidies for sugar-sweetened beverages could reduce obesity and type 2 diabetes. *Health Aff Proj Hope* 2014;**33**:1032–9. doi:10.1377/hlthaff.2013.1246
- 20  
21  
22  
23 65 Basu S, Lewis K. Reducing added sugars in the food supply through a cap-and-trade approach. *Am J Public Health* 2014;**104**:2432–8. doi:10.2105/AJPH.2014.302170
- 24  
25  
26  
27 66 Caro JJ, Briggs AH, Siebert U, *et al.* Modeling good research practices--overview: a report of the ISPOR-SMDM Modeling Good Research Practices Task Force--1. *Value Health J Int Soc Pharmacoeconomics Outcomes Res* 2012;**15**:796–803. doi:10.1016/j.jval.2012.06.012
- 28  
29  
30  
31 67 Husereau D, Drummond M, Petrou S, *et al.* Consolidated Health Economic Evaluation Reporting Standards (CHEERS)—Explanation and Elaboration: A Report of the ISPOR Health Economic Evaluation Publication Guidelines Good Reporting Practices Task Force. *Value Health* 2013;**16**:231–50. doi:10.1016/j.jval.2013.02.002
- 32  
33  
34  
35 68 Stewart WJ. *Introduction to the Numerical Solution of Markov Chains. 1st ed. Princeton: Princeton University Press; 1994.*
- 36  
37  
38  
39 69 U.S. Census Bureau, Population Division. Table 9: Projections of the Population by Sex and Age for the United States: 2015 to 2060 (NP2014-T9). 2014. Accessed on <http://www.census.gov/population/projections/> at Apr 23, 2015.
- 40  
41  
42  
43 70 National Center for Health Statistics (U.S.), ed. National Health and Nutrition Examination Survey: Analytic Guidelines, 1999-2010. Hyattsville, Maryland: U.S. Department of Health and Human Services, Centers for Disease Control and Prevention, National Center for Health Statistics; 2013.
- 44  
45  
46  
47 71 United States Department of Agriculture. Food Patterns Equivalents Database. USDA Agricultural Research Service. <http://www.ars.usda.gov/Services/docs.htm?docid=23869>. Published December 2014. Accessed January 29, 2015.
- 48  
49  
50  
51 72 Geiss LS, Wang J, Cheng YJ, *et al.* Prevalence and incidence trends for diagnosed diabetes among adults aged 20 to 79 years, United States, 1980-2012. *JAMA* 2014;**312**:1218–26. doi:10.1001/jama.2014.11494
- 52  
53  
54  
55  
56  
57  
58  
59  
60

- 1  
2  
3 73 Stout NK, Goldie SJ. Keeping the noise down: common random numbers for disease simulation  
4 modeling. *Health Care Manag Sci* 2008;**11**:399–406.  
5  
6 74 United States Department of Labor. CPI Inflation Calculator. Available:  
7 [http://www.bls.gov/data/inflation\\_calculator.htm](http://www.bls.gov/data/inflation_calculator.htm).  
8  
9 75 Zhang E, Wartelle-Bladou C, Lepanto L, *et al*. Cost-utility analysis of nonalcoholic steatohepatitis  
10 screening. *Eur Radiol* 2015;**25**:3282–94. doi:10.1007/s00330-015-3731-2  
11  
12 76 Murray CJL, Vos T, Lozano R, *et al*. Disability-adjusted life years (DALYs) for 291 diseases and  
13 injuries in 21 regions, 1990-2010: a systematic analysis for the Global Burden of Disease Study  
14 2010. *Lancet Lond Engl* 2012;**380**:2197–223. doi:10.1016/S0140-6736(12)61689-4  
15  
16 77 Michelotti GA, Machado MV, Diehl AM. NAFLD, NASH and liver cancer. *Nat Rev Gastroenterol*  
17 *Hepatol* 2013;**10**:656–65. doi:10.1038/nrgastro.2013.183  
18  
19 78 Page JM, Harrison SA. NASH and HCC. *Clin Liver Dis* 2009;**13**:631–47.  
20 doi:10.1016/j.cld.2009.07.007  
21  
22 79 Foster T, Anania FA, Li D, *et al*. The prevalence and clinical correlates of nonalcoholic fatty liver  
23 disease (NAFLD) in African Americans: the multiethnic study of atherosclerosis (MESA). *Dig Dis*  
24 *Sci* 2013;**58**:2392–8. doi:10.1007/s10620-013-2652-7  
25  
26 80 Farrell GC, Larter CZ. Nonalcoholic fatty liver disease: from steatosis to cirrhosis. *Hepatol Baltim*  
27 *Md* 2006;**43**:S99–112. doi:10.1002/hep.20973  
28  
29 81 Baumeister SE, Völzke H, Marschall P, *et al*. Impact of fatty liver disease on health care  
30 utilization and costs in a general population: a 5-year observation. *Gastroenterology*  
31 2008;**134**:85–94. doi:10.1053/j.gastro.2007.10.024  
32  
33 82 Adams LA, Lymp JF, St Sauver J, *et al*. The natural history of nonalcoholic fatty liver disease: a  
34 population-based cohort study. *Gastroenterology* 2005;**129**:113–21.  
35  
36 83 Ascha MS, Hanouneh IA, Lopez R, *et al*. The incidence and risk factors of hepatocellular  
37 carcinoma in patients with nonalcoholic steatohepatitis. *Hepatol Baltim Md* 2010;**51**:1972–8.  
38 doi:10.1002/hep.23527  
39  
40 84 Bambha K, Belt P, Abraham M, *et al*. Ethnicity and nonalcoholic fatty liver disease. *Hepatol*  
41 *Baltim Md* 2012;**55**:769–80. doi:10.1002/hep.24726  
42  
43 85 McAdam-Marx C, McGarry LJ, Hane CA, *et al*. All-cause and incremental per patient per year  
44 cost associated with chronic hepatitis C virus and associated liver complications in the United  
45 States: a managed care perspective. *J Manag Care Pharm JMCP* 2011;**17**:531–46.  
46 doi:10.18553/jmcp.2011.17.7.531  
47  
48 86 Lightwood J, Bibbins-Domingo K, Coxson P, *et al*. Forecasting the future economic burden of  
49 current adolescent overweight: an estimate of the coronary heart disease policy model. *Am J*  
50 *Public Health* 2009;**99**:2230–7. doi:10.2105/AJPH.2008.152595  
51  
52 87 American Diabetes Association. Economic costs of diabetes in the U.S. in 2012. *Diabetes Care*  
53 2013;**36**:1033–46. doi:10.2337/dc12-2625  
54  
55  
56  
57  
58  
59  
60

- 1  
2  
3 88 Li Q, Blume SW, Huang JC, *et al.* The Economic Burden of Obesity by Glycemic Stage in the  
4 United States. *PharmacoEconomics* 2015;**33**:735–48. doi:10.1007/s40273-014-0248-5  
5  
6 89 Darbà J, Kaskens L, Detournay B, *et al.* Disability-adjusted life years lost due to diabetes in  
7 France, Italy, Germany, Spain, and the United Kingdom: a burden of illness study. *Clin Outcomes*  
8 *Res CEOR* 2015;**7**:163–71. doi:10.2147/CEOR.S78132  
9  
10 90 Keating CL, Peeters A, Swinburn BA, *et al.* Utility-based quality of life associated with  
11 overweight and obesity: the Australian diabetes, obesity, and lifestyle study. *Obes Silver Spring*  
12 *Md* 2013;**21**:652–5. doi:10.1002/oby.20290  
13  
14 91 U.S. Census Bureau, Population Division. Population Estimates. Accessed on  
15 <http://www.census.gov/popest/index.html> at Apr 23, 2015.  
16  
17 92 Anstee QM, Targher G, Day CP. Progression of NAFLD to diabetes mellitus, cardiovascular  
18 disease or cirrhosis. *Nat Rev Gastroenterol Hepatol* 2013;**10**:330–44.  
19 doi:10.1038/nrgastro.2013.41  
20  
21 93 Bruno S, Maisonneuve P, Castellana P, *et al.* Incidence and risk factors for non-alcoholic  
22 steatohepatitis: prospective study of 5408 women enrolled in Italian tamoxifen  
23 chemoprevention trial. *BMJ* 2005;**330**:932. doi:10.1136/bmj.38391.663287.E0  
24  
25 94 Ekstedt M, Franzén LE, Mathiesen UL, *et al.* Long-term follow-up of patients with NAFLD and  
26 elevated liver enzymes. *Hepatol Baltim Md* 2006;**44**:865–73. doi:10.1002/hep.21327  
27  
28 95 Haukeland JW, Lorgen I, Schreiner LT, *et al.* Incidence rates and causes of cirrhosis in a  
29 Norwegian population. *Scand J Gastroenterol* 2007;**42**:1501–8.  
30 doi:10.1080/00365520701478014  
31  
32 96 Musso G, Cassader M, Bo S, *et al.* Sterol regulatory element-binding factor 2 (SREBF-2) predicts  
33 7-year NAFLD incidence and severity of liver disease and lipoprotein and glucose  
34 dysmetabolism. *Diabetes* 2013;**62**:1109–20. doi:10.2337/db12-0858  
35  
36 97 Omagari K, Kadokawa Y, Masuda J-I, *et al.* Fatty liver in non-alcoholic non-overweight Japanese  
37 adults: incidence and clinical characteristics. *J Gastroenterol Hepatol* 2002;**17**:1098–105.  
38  
39 98 Rafiq N, Bai C, Fang Y, *et al.* Long-term follow-up of patients with nonalcoholic fatty liver. *Clin*  
40 *Gastroenterol Hepatol Off Clin Pract J Am Gastroenterol Assoc* 2009;**7**:234–8.  
41 doi:10.1016/j.cgh.2008.11.005  
42  
43 99 Wong VW-S, Wong GL-H, Yeung DK-W, *et al.* Incidence of non-alcoholic fatty liver disease in  
44 Hong Kong: a population study with paired proton-magnetic resonance spectroscopy. *J Hepatol*  
45 2015;**62**:182–9. doi:10.1016/j.jhep.2014.08.041  
46  
47 100 Zelber-Sagi S, Lotan R, Shlomain A, *et al.* Predictors for incidence and remission of NAFLD in the  
48 general population during a seven-year prospective follow-up. *J Hepatol* 2012;**56**:1145–51.  
49 doi:10.1016/j.jhep.2011.12.011  
50  
51 101 Kawamura Y, Arase Y, Ikeda K, *et al.* Large-scale long-term follow-up study of Japanese patients  
52 with non-alcoholic Fatty liver disease for the onset of hepatocellular carcinoma. *Am J*  
53 *Gastroenterol* 2012;**107**:253–61. doi:10.1038/ajg.2011.327  
54  
55  
56  
57  
58  
59  
60

- 1  
2  
3 102 Njei B, Rotman Y, Ditah I, *et al.* Emerging trends in hepatocellular carcinoma incidence and  
4 mortality. *Hepatol Baltim Md* 2015;**61**:191–9. doi:10.1002/hep.27388  
5  
6 103 El-Serag HB, Mason AC. Rising incidence of hepatocellular carcinoma in the United States. *N*  
7 *Engl J Med* 1999;**340**:745–50. doi:10.1056/NEJM199903113401001  
8  
9 104 Lazo M, Hernaez R, Bonekamp S, *et al.* Non-alcoholic fatty liver disease and mortality among US  
10 adults: prospective cohort study. *BMJ* 2011;**343**:d6891.  
11  
12 105 Stepanova M, Rafiq N, Makhlof H, *et al.* Predictors of all-cause mortality and liver-related  
13 mortality in patients with non-alcoholic fatty liver disease (NAFLD). *Dig Dis Sci* 2013;**58**:3017–  
14 23. doi:10.1007/s10620-013-2743-5  
15  
16 106 Söderberg C, Stål P, Askling J, *et al.* Decreased survival of subjects with elevated liver function  
17 tests during a 28-year follow-up. *Hepatol Baltim Md* 2010;**51**:595–602. doi:10.1002/hep.23314  
18  
19 107 Hafliadottir S, Jonasson JG, Norland H, *et al.* Long-term follow-up and liver-related death rate  
20 in patients with non-alcoholic and alcoholic related fatty liver disease. *BMC Gastroenterol*  
21 2014;**14**:166. doi:10.1186/1471-230X-14-166  
22  
23 108 *National Heart, Lung, and Blood Institute . Morbidity & Mortality: 2012 Chart Book on*  
24 *Cardiovascular, Lung, and Blood Diseases. National Institutes of Health. National Heart, Lung,*  
25 *and Blood Institute. 2012.*  
26  
27 109 *National Heart, Lung, and Blood Institute . Incidence and Prevalence: 2006 Chart Book on*  
28 *Cardiovascular and Lung Diseases. National Institutes of Health. National Heart, Lung, and*  
29 *Blood Institute. 2006.*  
30  
31 110 Fishman EI, Stokes A, Preston SH. The dynamics of diabetes among birth cohorts in the U.S.  
32 *Diabetes Care* 2014;**37**:1052–9. doi:10.2337/dc13-1982  
33  
34 111 Daouli J, Davillas A, Demoussis M, *et al.* Obesity persistence and duration dependence:  
35 evidence from a cohort of US adults (1985-2010). *Econ Hum Biol* 2014;**12**:30–44.  
36 doi:10.1016/j.ehb.2013.07.002  
37  
38 112 Gordon-Larsen P, Adair LS, Nelson MC, *et al.* Five-year obesity incidence in the transition period  
39 between adolescence and adulthood: the National Longitudinal Study of Adolescent Health. *Am*  
40 *J Clin Nutr* 2004;**80**:569–75.  
41  
42 113 Parikh NI, Pencina MJ, Wang TJ, *et al.* Increasing trends in incidence of overweight and obesity  
43 over 5 decades. *Am J Med* 2007;**120**:242–50. doi:10.1016/j.amjmed.2006.06.004  
44  
45 114 Williamson DF, Kahn HS, Byers T. The 10-y incidence of obesity and major weight gain in black  
46 and white US women aged 30-55 y. *Am J Clin Nutr* 1991;**53**:1515S–1518S.  
47  
48 115 Schneider ALC, Lazo M, Selvin E, *et al.* Racial differences in nonalcoholic fatty liver disease in the  
49 U.S. population. *Obes Silver Spring Md* 2014;**22**:292–9. doi:10.1002/oby.20426  
50  
51 116 Kelishadi R, Cook SR, Adibi A, *et al.* Association of the components of the metabolic syndrome  
52 with non-alcoholic fatty liver disease among normal-weight, overweight and obese children and  
53 adolescents. *Diabetol Metab Syndr* 2009;**1**:29. doi:10.1186/1758-5996-1-29  
54  
55  
56  
57  
58  
59  
60

- 1  
2  
3 117 Peng L, Wang J, Li F. Weight reduction for non-alcoholic fatty liver disease. *Cochrane Database*  
4 *Syst Rev* 2011;:CD003619. doi:10.1002/14651858.CD003619.pub3  
5  
6 118 Dassanayake AS, Kasturiratne A, Rajindrajith S, *et al.* Prevalence and risk factors for non-  
7 alcoholic fatty liver disease among adults in an urban Sri Lankan population. *J Gastroenterol*  
8 *Hepatol* 2009;**24**:1284–8. doi:10.1111/j.1440-1746.2009.05831.x  
9  
10 119 Lee K, Sung J-A, Kim J-S, *et al.* The roles of obesity and gender on the relationship between  
11 metabolic risk factors and non-alcoholic fatty liver disease in Koreans. *Diabetes Metab Res Rev*  
12 2009;**25**:150–5. doi:10.1002/dmrr.924  
13  
14 120 Zeb I, Katz R, Nasir K, *et al.* Relation of nonalcoholic fatty liver disease to the metabolic  
15 syndrome: the Multi-Ethnic Study of Atherosclerosis. *J Cardiovasc Comput Tomogr* 2013;**7**:311–  
16 8. doi:10.1016/j.jcct.2013.08.011  
17  
18 121 Chan W-K, Tan AT-B, Vethakkan SR, *et al.* Non-alcoholic fatty liver disease in diabetics--  
19 prevalence and predictive factors in a multiracial hospital clinic population in Malaysia. *J*  
20 *Gastroenterol Hepatol* 2013;**28**:1375–83. doi:10.1111/jgh.12204  
21  
22 122 Papandreou D, Karabouta Z, Pantoleon A, *et al.* Investigation of anthropometric, biochemical  
23 and dietary parameters of obese children with and without non-alcoholic fatty liver disease.  
24 *Appetite* 2012;**59**:939–44. doi:10.1016/j.appet.2012.09.006  
25  
26 123 Wong VW-S, Wong GL-H, Yip GW-K, *et al.* Coronary artery disease and cardiovascular outcomes  
27 in patients with non-alcoholic fatty liver disease. *Gut* 2011;**60**:1721–7.  
28 doi:10.1136/gut.2011.242016  
29  
30 124 Hamaguchi M, Kojima T, Takeda N, *et al.* Nonalcoholic fatty liver disease is a novel predictor of  
31 cardiovascular disease. *World J Gastroenterol* 2007;**13**:1579–84.  
32  
33 125 Fan J-G, Li F, Cai X-B, *et al.* Effects of nonalcoholic fatty liver disease on the development of  
34 metabolic disorders. *J Gastroenterol Hepatol* 2007;**22**:1086–91. doi:10.1111/j.1440-  
35 1746.2006.04781.x  
36  
37 126 Targher G, Bertolini L, Rodella S, *et al.* Nonalcoholic fatty liver disease is independently  
38 associated with an increased incidence of cardiovascular events in type 2 diabetic patients.  
39 *Diabetes Care* 2007;**30**:2119–21. doi:10.2337/dc07-0349  
40  
41 127 Treeprasertsuk S, Leverage S, Adams LA, *et al.* The Framingham risk score and heart disease in  
42 nonalcoholic fatty liver disease. *Liver Int Off J Int Assoc Study Liver* 2012;**32**:945–50.  
43 doi:10.1111/j.1478-3231.2011.02753.x  
44  
45 128 Canoy D, Cairns BJ, Balkwill A, *et al.* Body mass index and incident coronary heart disease in  
46 women: a population-based prospective study. *BMC Med* 2013;**11**:87. doi:10.1186/1741-7015-  
47 11-87  
48  
49 129 Global Burden of Metabolic Risk Factors for Chronic Diseases Collaboration (BMI Mediated  
50 Effects), Lu Y, Hajifathalian K, *et al.* Metabolic mediators of the effects of body-mass index,  
51 overweight, and obesity on coronary heart disease and stroke: a pooled analysis of 97  
52 prospective cohorts with 1·8 million participants. *Lancet Lond Engl* 2014;**383**:970–83.  
53 doi:10.1016/S0140-6736(13)61836-X  
54  
55  
56  
57  
58  
59  
60

- 1  
2  
3 130 Gruson E, Montaye M, Kee F, *et al.* Anthropometric assessment of abdominal obesity and  
4 coronary heart disease risk in men: the PRIME study. *Heart Br Card Soc* 2010;**96**:136–40.  
5 doi:10.1136/hrt.2009.171447  
6
- 7 131 de Hollander EL, Bogers RP, Boshuizen HC, *et al.* Influence of calendar period on the association  
8 between BMI and coronary heart disease: a meta-analysis of 31 cohorts. *Obes Silver Spring Md*  
9 2013;**21**:865–80. doi:10.1002/oby.20043  
10
- 11 132 Labounty TM, Gomez MJ, Achenbach S, *et al.* Body mass index and the prevalence, severity,  
12 and risk of coronary artery disease: an international multicentre study of 13,874 patients. *Eur*  
13 *Heart J Cardiovasc Imaging* 2013;**14**:456–63. doi:10.1093/ehjci/jes179  
14
- 15 133 Mongraw-Chaffin ML, Peters SAE, Huxley RR, *et al.* The sex-specific association between BMI  
16 and coronary heart disease: a systematic review and meta-analysis of 95 cohorts with 1.2  
17 million participants. *Lancet Diabetes Endocrinol* 2015;**3**:437–49. doi:10.1016/S2213-  
18 8587(15)00086-8  
19
- 20 134 Park YS, Kim J-S. Obesity phenotype and coronary heart disease risk as estimated by the  
21 Framingham risk score. *J Korean Med Sci* 2012;**27**:243–9. doi:10.3346/jkms.2012.27.3.243  
22  
23
- 24 135 Taylor AE, Ebrahim S, Ben-Shlomo Y, *et al.* Comparison of the associations of body mass index  
25 and measures of central adiposity and fat mass with coronary heart disease, diabetes, and all-  
26 cause mortality: a study using data from 4 UK cohorts. *Am J Clin Nutr* 2010;**91**:547–56.  
27 doi:10.3945/ajcn.2009.28757  
28
- 29 136 Peters SAE, Huxley RR, Woodward M. Diabetes as risk factor for incident coronary heart disease  
30 in women compared with men: a systematic review and meta-analysis of 64 cohorts including  
31 858,507 individuals and 28,203 coronary events. *Diabetologia* 2014;**57**:1542–51.  
32 doi:10.1007/s00125-014-3260-6  
33
- 34 137 Shibata M, Kihara Y, Taguchi M, *et al.* Nonalcoholic fatty liver disease is a risk factor for type 2  
35 diabetes in middle-aged Japanese men. *Diabetes Care* 2007;**30**:2940–4. doi:10.2337/dc07-0792  
36
- 37 138 Kim C-H, Park J-Y, Lee K-U, *et al.* Fatty liver is an independent risk factor for the development of  
38 Type 2 diabetes in Korean adults. *Diabet Med J Br Diabet Assoc* 2008;**25**:476–81.  
39 doi:10.1111/j.1464-5491.2008.02410.x  
40
- 41 139 Yamada T, Fukatsu M, Suzuki S, *et al.* Fatty liver predicts impaired fasting glucose and type 2  
42 diabetes mellitus in Japanese undergoing a health checkup. *J Gastroenterol Hepatol*  
43 2010;**25**:352–6. doi:10.1111/j.1440-1746.2009.05998.x  
44
- 45 140 Sung K-C, Kim SH. Interrelationship between fatty liver and insulin resistance in the  
46 development of type 2 diabetes. *J Clin Endocrinol Metab* 2011;**96**:1093–7. doi:10.1210/jc.2010-  
47 2190  
48
- 49 141 Kasturiratne A, Weerasinghe S, Dassanayake AS, *et al.* Influence of non-alcoholic fatty liver  
50 disease on the development of diabetes mellitus. *J Gastroenterol Hepatol* 2013;**28**:142–7.  
51 doi:10.1111/j.1440-1746.2012.07264.x  
52
- 53 142 Abdullah A, Peeters A, de Courten M, *et al.* The magnitude of association between overweight  
54 and obesity and the risk of diabetes: a meta-analysis of prospective cohort studies. *Diabetes*  
55 *Res Clin Pract* 2010;**89**:309–19. doi:10.1016/j.diabres.2010.04.012  
56  
57  
58  
59  
60

- 1  
2  
3 143 Nyamdorj R, Qiao Q, Söderberg S, *et al.* BMI compared with central obesity indicators as a  
4 predictor of diabetes incidence in Mauritius. *Obes Silver Spring Md* 2009;**17**:342–8.  
5 doi:10.1038/oby.2008.503  
6
- 7 144 Rolando L, Byrne DW, McGown PW, *et al.* Health risk factor modification predicts incidence of  
8 diabetes in an employee population: results of an 8-year longitudinal cohort study. *J Occup*  
9 *Environ Med* 2013;**55**:410–5. doi:10.1097/JOM.0b013e31827cbaec  
10
- 11 145 Rodbard HW, Bays HE, Gavin JR, *et al.* Rate and risk predictors for development of self-reported  
12 type-2 diabetes mellitus over a 5-year period: the SHIELD study. *Int J Clin Pract* 2012;**66**:684–91.  
13 doi:10.1111/j.1742-1241.2012.02952.x  
14
- 15 146 Kodama S, Horikawa C, Fujihara K, *et al.* Quantitative relationship between body weight gain in  
16 adulthood and incident type 2 diabetes: a meta-analysis. *Obes Rev Off J Int Assoc Study Obes*  
17 2014;**15**:202–14. doi:10.1111/obr.12129  
18
- 19 147 Bell JA, Kivimaki M, Hamer M. Metabolically healthy obesity and risk of incident type 2  
20 diabetes: a meta-analysis of prospective cohort studies. *Obes Rev Off J Int Assoc Study Obes*  
21 2014;**15**:504–15. doi:10.1111/obr.12157  
22
- 23 148 Guh DP, Zhang W, Bansback N, *et al.* The incidence of co-morbidities related to obesity and  
24 overweight: a systematic review and meta-analysis. *BMC Public Health* 2009;**9**:88.  
25 doi:10.1186/1471-2458-9-88  
26
- 27 149 Emond JA, Patterson RE, Jardack PM, *et al.* Using doubly labeled water to validate associations  
28 between sugar-sweetened beverage intake and body mass among White and African-American  
29 adults. *Int J Obes 2005* 2014;**38**:603–9. doi:10.1038/ijo.2013.130  
30
- 31 150 Grimes CA, Riddell LJ, Campbell KJ, *et al.* Dietary salt intake, sugar-sweetened beverage  
32 consumption, and obesity risk. *Pediatrics* 2013;**131**:14–21. doi:10.1542/peds.2012-1628  
33
- 34 151 Gregg EW, Boyle JP, Thompson TJ, *et al.* Modeling the impact of prevention policies on future  
35 diabetes prevalence in the United States: 2010-2030. *Popul Health Metr* 2013;**11**:18.  
36 doi:10.1186/1478-7954-11-18  
37
- 38 152 Guariguata L, Whiting DR, Hambleton I, *et al.* Global estimates of diabetes prevalence for 2013  
39 and projections for 2035. *Diabetes Res Clin Pract* 2014;**103**:137–49.  
40 doi:10.1016/j.diabres.2013.11.002  
41
- 42 153 Huang ES, Basu A, O'Grady M, *et al.* Projecting the future diabetes population size and related  
43 costs for the U.S. *Diabetes Care* 2009;**32**:2225–9. doi:10.2337/dc09-0459  
44
- 45 154 Finkelstein EA, Khavjou OA, Thompson H, *et al.* Obesity and severe obesity forecasts through  
46 2030. *Am J Prev Med* 2012;**42**:563–70. doi:10.1016/j.amepre.2011.10.026  
47
- 48 155 Odden MC, Coxson PG, Moran A, *et al.* The impact of the aging population on coronary heart  
49 disease in the United States. *Am J Med* 2011;**124**:827–833.e5.  
50 doi:10.1016/j.amjmed.2011.04.010  
51
- 52 156 American Cancer Society. Cancer Facts & Figures 2012. Atlanta: American Cancer Society; 2012.  
53  
54  
55  
56  
57  
58  
59  
60

- 1  
2  
3 157 Younossi ZM, Blissett D, Blissett R, *et al.* The economic and clinical burden of nonalcoholic fatty  
4 liver disease in the United States and Europe. *Hepatology* 2016;**64**:1577–86.  
5 doi:10.1002/hep.28785  
6  
7 158 Ervin RB, Ogden CL. Consumption of added sugars among U.S. adults, 2005-2010. *NCHS Data*  
8 *Brief* 2013;;1–8.  
9  
10 159 Morgan Stanley Research (2015). The bittersweet aftertaste of sugar. March 18, 2015.  
11 [http://static.latribune.fr/463077/etude-morgan-stanley-impact-diabete-sur-l-economie-](http://static.latribune.fr/463077/etude-morgan-stanley-impact-diabete-sur-l-economie-mondiale.pdf)  
12 [mondiale.pdf](http://static.latribune.fr/463077/etude-morgan-stanley-impact-diabete-sur-l-economie-mondiale.pdf).  
13  
14 160 Gombi-Vaca MF, Sichieri R, Verly-Jr E. Caloric compensation for sugar-sweetened beverages in  
15 meals: A population-based study in Brazil. *Appetite* 2016;**98**:67–73.  
16 doi:10.1016/j.appet.2015.12.014  
17  
18 161 Saadeh S, Younossi ZM, Remer EM, *et al.* The utility of radiological imaging in nonalcoholic fatty  
19 liver disease. *Gastroenterology* 2002;**123**:745–50.  
20  
21 162 Lustig RH. Sickeningly Sweet: Does Sugar Cause Type 2 Diabetes? Yes. *Can J Diabetes*  
22 2016;**40**:282–6. doi:10.1016/j.jcjd.2016.01.004  
23  
24  
25  
26  
27  
28  
29  
30  
31  
32  
33  
34  
35  
36  
37  
38  
39  
40  
41  
42  
43  
44  
45  
46  
47  
48  
49  
50  
51  
52  
53  
54  
55  
56  
57  
58  
59  
60



Figure 1. Model state and covariate structure.

Each individual gets assigned a state in each chain at the start of the simulation and their specific covariates (age, sex, ethnicity, high/low sugar consumption). Circles represent disease states. Solid lines indicate a possible transition pathway between states. Coloured lines indicate how being in a state within one chain can affect the value of the transition probability between two states in another chain. These are split into three categories: pink striped lines indicate the effect of NAFLD on progression in the BMI, T2D and CHD chains. Blue dotted lines indicate the effect of overweight and obesity on progression in the NAFLD, T2D and CHD chains. The green dotted line indicates the effect of T2D on progression in the CHD chain. 3 chains contain disease related deaths and the model contains a non-disease related death state for other causes of mortality. The states of individuals are updated every cycle (i.e. annually) for 20 years. Each cycle the state distributions and their related costs and DALYs are generated as output.

NAFLD: non-alcoholic fatty liver disease, T2D: type 2 diabetes, CHD: coronary heart disease, NASH: non-alcoholic steatohepatitis, HCC: hepatocellular carcinoma, DALYs: disability-adjusted life years.

340x156mm (300 x 300 DPI)

1  
2  
3  
4  
5  
6  
7  
8  
9  
10  
11  
12  
13  
14  
15  
16  
17  
18  
19  
20  
21  
22  
23  
24  
25  
26  
27  
28  
29  
30  
31  
32  
33  
34  
35  
36  
37  
38  
39  
40  
41  
42  
43  
44  
45  
46  
47  
48  
49  
50  
51  
52  
53  
54  
55  
56  
57  
58  
59  
60



Figure 2, graphs A to H. reduction in population prevalence of disease due to interventions. Lines represent mean values +/- one standard deviation. 0% is the baseline, representing no intervention. The blue lines with diamonds indicate a reduction of added sugar of 20%. The red lines with crosses represent a reduction of 50%. NASH; non-alcoholic steatohepatitis.

249x346mm (300 x 300 DPI)



Figure 3. Tornado diagram of the ten most critical variables on total costs averted in the year 2035.

44x21mm (300 x 300 DPI)

1  
2  
3  
4  
5  
6  
7  
8  
9  
10  
11  
12  
13  
14  
15  
16  
17  
18  
19  
20  
21  
22  
23  
24  
25  
26  
27  
28  
29  
30  
31  
32  
33  
34  
35  
36  
37  
38  
39  
40  
41  
42  
43  
44  
45  
46  
47  
48  
49  
50  
51  
52  
53  
54  
55  
56  
57  
58  
59  
60



Figure 4. Tornado diagram of the ten most critical variables on total DALYs averted in the year 2035.

45x21mm (300 x 300 DPI)

For peer review only

Online supplement

**Non-alcoholic fatty liver disease as a mediator of sugar effects; implications for the health and economic benefits of interventions in the US**

*Rick A Vreman, Alex J Goodell, Luis A Rodriguez, Travis C Porco, Robert H Lustig, James G Kahn*

**Content**

**Table 1.** Selected model parameter values and ranges .....2

**Table 2.** Age distribution .....3

**Table 3.** Sex distribution.....4

**Table 4.** Ethnic distribution .....4

**Table 5.** Non-alcoholic fatty liver disease prevalence percentage at start of simulation.....4

**Table 6.** Hepatocellular carcinoma incidence rate from NASH .....4

**Table 7.** Hepatocellular carcinoma incidence rate from cirrhosis .....4

**Table 8.** Overweight and obesity prevalence percentages at the start of the simulation .....5

**Table 9.** Type 2 diabetes prevalence percentage at the start of the simulation .....6

**Table 10.** Type 2 diabetes incidence rate.....7

**Table 11.** Coronary heart disease prevalence percentage at the start of the simulation .....8

**Table 12.** Coronary heart disease incidence rate (in %) .....9

**Table 13.** Added sugar consumption distributions .....9

**Table 14.** Type 2 diabetes mortality rate .....10

**Table 15.** Coronary heart disease mortality rate (in %).....10

**Table 16.** Non-disease related mortality rate (in %) .....11

**Table 17.** IHME health-adjusted life expectancy and discounted life expectancy for females .....12

**Table 18.** IHME health-adjusted life expectancy and discounted life expectancy for males .....13

**References** .....14

**Table 1.** Selected model parameter values and ranges.

| Parameter                                                   | Distribution        | Mean               | Min        | Max        | Source        |
|-------------------------------------------------------------|---------------------|--------------------|------------|------------|---------------|
| <b>Initialization</b>                                       |                     |                    |            |            |               |
| Age distribution                                            | Fixed               | OS2*1              | -          | -          | [1]           |
| Sex distribution                                            | Fixed               | OS3*2              | -          | -          | [1]           |
| Ethnicity distribution                                      | Fixed               | OS4*3              | -          | -          | [1]           |
| Steatosis prevalence                                        | Beta                | 27.955%*4          | 18.637%    | 41.933%    | [2-4]         |
| NASH prevalence                                             | Beta                | 3.141%*4           | 2.094%     | 4.712%     | [2-4]         |
| Cirrhosis prevalence                                        | Beta                | 0.314%*4           | 0.209%     | 0.471%     | [5-8]         |
| HCC prevalence                                              | Beta                | 0.025%*4           | 0.017%     | 0.038%     | [9,10]        |
| CHD prevalence                                              | Fixed               | 6.544%*5           | -          | -          | [11]          |
| T2D prevalence                                              | Fixed               | 9.447%*6           | -          | -          | [11]          |
| Overweight prevalence                                       | Fixed               | 33.473%*7          | -          | -          | [11]          |
| Obesity prevalence                                          | Fixed               | 37.391%*8          | -          | -          | [11]          |
| High sugar consumption                                      | Beta                | 57.278%*9          | 38.186%    | 85.917%    | [12,13]       |
| <b>Baseline transition probabilities</b>                    |                     |                    |            |            |               |
|                                                             | <b>Distribution</b> | <b>Mean chance</b> | <b>Min</b> | <b>Max</b> | <b>Source</b> |
| Non-NAFLD -> steatosis                                      | Beta                | 0.0100             | 0.006700   | 0.01500    | [14-22]       |
| Non-NAFLD -> NASH                                           | Beta                | 0.0003             | 0.000201   | 0.00045    | [14-22]       |
| Steatosis -> non-NAFLD                                      | Beta                | 0.0200             | 0.013400   | 0.03000    | [14-22]       |
| Steatosis -> NASH                                           | Beta                | 0.0060             | 0.004020   | 0.00900    | [14-22]       |
| Steatosis -> cirrhosis                                      | Beta                | 0.0002             | 0.000134   | 0.00030    | [14-22]       |
| NASH -> non-NAFLD                                           | Beta                | 0.0010             | 0.000670   | 0.00150    | [14-22]       |
| NASH -> steatosis                                           | Beta                | 0.0200             | 0.013400   | 0.03000    | [14-22]       |
| NASH -> cirrhosis                                           | Beta                | 0.0020             | 0.001340   | 0.00300    | [14-22]       |
| NASH -> HCC                                                 | Beta                | 0.0001*10          | 0.000067   | 0.00015    | [14-25]       |
| NASH -> liver death                                         | Beta                | 0.0038             | 0.002546   | 0.00570    | [26-29]       |
| Cirrhosis -> HCC                                            | Beta                | 0.0200*10          | 0.013400   | 0.03000    | [14-25]       |
| Cirrhosis -> liver death                                    | Beta                | 0.0340             | 0.022780   | 0.05100    | [26-29]       |
| HCC -> liver death                                          | Beta                | 0.5000             | 0.335000   | 0.75000    | [26-29]       |
| Non-CHD -> CHD                                              | Beta                | 0.0045*11          | 0.003015   | 0.00675    | [30,31]       |
| CHD -> CHD death                                            | Beta                | 0.0100*12          | 0.006700   | 0.01500    | [30-32]       |
| Non-T2D -> T2D                                              | Beta                | 0.0045*13          | 0.003015   | 0.00675    | [33,34]       |
| T2D -> T2D death                                            | Beta                | 0.0100*14          | 0.006700   | 0.01500    | [32-34]       |
| Healthy weight -> overweight                                | Beta                | 0.0500             | 0.033500   | 0.07500    | [35-38]       |
| Healthy weight -> obese                                     | Beta                | 0.0060             | 0.004020   | 0.00900    | [35-38]       |
| Overweight -> healthy weight                                | Beta                | 0.0500             | 0.033500   | 0.07500    | [35-38]       |
| Overweight -> obese                                         | Beta                | 0.0180             | 0.012060   | 0.02700    | [35-38]       |
| Obese -> healthy weight                                     | Beta                | 0.0060             | 0.004020   | 0.00900    | [35-38]       |
| Obese -> overweight                                         | Beta                | 0.0350             | 0.023450   | 0.05250    | [35-38]       |
| Each alive state -> non-disease related death               | Beta                | 0.0100*15          | 0.006700   | 0.01500    | [32]          |
| <b>Risk factors</b>                                         |                     |                    |            |            |               |
|                                                             | <b>Distribution</b> | <b>Mean value</b>  | <b>Min</b> | <b>Max</b> | <b>Source</b> |
| NHB ethnicity for progression within NAFLD                  | Beta                | 0.93               | 0.70       | 1.00       | [39]          |
| Hispanic ethnicity for progression within NAFLD             | Beta                | 1.67               | 1.22       | 2.22       | [39]          |
| Overweight for progression within NAFLD                     | Beta                | 2.19               | 1.60       | 3.38       | [15,40-45]    |
| Obesity for progression within NAFLD                        | Beta                | 3.14               | 2.07       | 5.28       | [15,40-45]    |
| High sugar consumption for progression within NAFLD         | Beta                | 2.00               | 1.50       | 3.00       | [46,47]       |
| NAFLD for TP non-CHD -> CHD                                 | Beta                | 2.31               | 1.66       | 3.62       | [48-52]       |
| Overweight for TP non-CHD -> CHD                            | Beta                | 1.22               | 1.12       | 1.32       | [53-60]       |
| Obesity for TP non-CHD -> CHD                               | Beta                | 1.60               | 1.43       | 1.79       | [53-60]       |
| T2D for TP non-CHD -> CHD                                   | Beta                | 2.24               | 1.64       | 3.06       | [61]          |
| NAFLD for TP non-T2D -> T2D                                 | Beta                | 2.73               | 1.87       | 4.46       | [62-68]       |
| Overweight for TP non-T2D -> T2D                            | Beta                | 2.18               | 1.59       | 3.36       | [69-75]       |
| Obesity for TP non-T2D -> T2D                               | Beta                | 3.36               | 2.18       | 5.72       | [69-75]       |
| NAFLD for progression within the BMI chain                  | Beta                | 2.19               | 1.60       | 3.38       | [15,40-45]    |
| High sugar consumption for progression within the BMI chain | Beta                | 2.60               | 1.20       | 6.00       | [76,77]       |
| <b>Regression rates</b>                                     |                     |                    |            |            |               |
|                                                             | <b>Distribution</b> | <b>Mean value</b>  | <b>Min</b> | <b>Max</b> | <b>Source</b> |
| CHD incidence regression rate/year                          | Beta                | 0.985              | 0.970      | 1.00       | [78-81]       |
| CHD mortality regression rate/year                          | Beta                | 0.979              | 0.958      | 1.00       | [78-81]       |
| Non-disease mortality regression rate/year (20-30)          | Beta                | 1.000              | 0.990      | 1.00       | [32]          |
| Non-disease mortality regression rate/year (30-55)          | Beta                | 0.980              | 0.960      | 1.00       | [32]          |
| Non-disease mortality regression rate/year (55+)            | Beta                | 0.970              | 0.940      | 1.00       | [32]          |

**Table 1.** Continued

| Costs (annual direct medical, in 2015 USD) | Distribution | Mean value | SD    | Source  |
|--------------------------------------------|--------------|------------|-------|---------|
| Steatosis                                  | Gamma        | 134        | 50    | [82-85] |
| NASH                                       | Gamma        | 267        | 100   | [82-85] |
| Cirrhosis                                  | Gamma        | 2861       | 1073  | [86]    |
| HCC                                        | Gamma        | 42644      | 15992 | [87,88] |
| CHD                                        | Gamma        | 13233      | 4962  | [89]    |
| T2D                                        | Gamma        | 8170       | 3064  | [90]    |
| Overweight                                 | Gamma        | 343        | 129   | [91]    |
| Obesity                                    | Gamma        | 916        | 344   | [91]    |

  

| Disability weights | Distribution | Mean value | Min   | Max   | Source |
|--------------------|--------------|------------|-------|-------|--------|
| NASH               | Beta         | 0.033      | 0.017 | 0.066 | [3,84] |
| Cirrhosis          | Beta         | 0.194      | 0.127 | 0.273 | [92]   |
| HCC                | Beta         | 0.294      | 0.199 | 0.411 | [92]   |
| CHD                | Beta         | 0.066      | 0.043 | 0.095 | [92]   |
| T2D                | Beta         | 0.150      | 0.080 | 0.220 | [92]   |
| Obesity            | Beta         | 0.012      | 0.001 | 0.022 | [93]   |

SD: standard deviation, CHD: coronary heart disease, T2D: type 2 diabetes, NAFLD: non-alcoholic fatty liver disease (steatosis, NASH & cirrhosis), NASH: non-alcoholic steatohepatitis, HCC: hepatocellular carcinoma, Hisp: Hispanic, NHW: non-Hispanic white, NHB: non-Hispanic black, TP: transition probability, OR: odds ratio

\*1 See online supplement table 2. \*2 See online supplement table 3. \*3 See online supplement table 4. \*4 See online supplement table 5. \*5 See online supplement table 6. \*6 See online supplement table 7. \*7 See online supplement table 8. \*8 See online supplement table 9. \*9 See online supplement table 10. \*10 See online supplement table 11. \*11 See online supplement table 12. \*12 See online supplement table 13. \*13 See online supplement table 14. \*14 See online supplement table 15. \*15 See online supplement table 16.

**Table 2.** Age distribution.[1]

| Age | Percentage | Age | Percentage |
|-----|------------|-----|------------|
| 20  | 1.9194     | 55  | 1.7505     |
| 21  | 1.9194     | 56  | 1.7505     |
| 22  | 1.9194     | 57  | 1.7505     |
| 23  | 1.9194     | 58  | 1.7505     |
| 24  | 1.9194     | 59  | 1.7505     |
| 25  | 1.8701     | 60  | 1.5024     |
| 26  | 1.8701     | 61  | 1.5024     |
| 27  | 1.8701     | 62  | 1.5024     |
| 28  | 1.8701     | 63  | 1.5024     |
| 29  | 1.8701     | 64  | 1.5024     |
| 30  | 1.7749     | 65  | 1.1073     |
| 31  | 1.7749     | 66  | 1.1073     |
| 32  | 1.7749     | 67  | 1.1073     |
| 33  | 1.7749     | 68  | 1.1073     |
| 34  | 1.7749     | 69  | 1.1073     |
| 35  | 1.7757     | 70  | 0.8256     |
| 36  | 1.7757     | 71  | 0.8256     |
| 37  | 1.7757     | 72  | 0.8256     |
| 38  | 1.7757     | 73  | 0.8256     |
| 39  | 1.7757     | 74  | 0.8256     |
| 40  | 1.8487     | 75  | 0.6473     |
| 41  | 1.8487     | 76  | 0.6473     |
| 42  | 1.8487     | 77  | 0.6473     |
| 43  | 1.8487     | 78  | 0.6473     |
| 44  | 1.8487     | 79  | 0.6473     |
| 45  | 2.0018     | 80  | 0.5093     |
| 46  | 2.0018     | 81  | 0.5093     |
| 47  | 2.0018     | 82  | 0.5093     |
| 48  | 2.0018     | 83  | 0.5093     |
| 49  | 2.0018     | 84  | 0.5093     |
| 50  | 1.9767     | 85+ | 2.4517     |
| 51  | 1.9767     |     |            |
| 52  | 1.9767     |     |            |
| 53  | 1.9767     |     |            |
| 54  | 1.9767     |     |            |

**Table 3.** Sex distribution.[1]

| Sex    | Percentage |
|--------|------------|
| Male   | 48.4388    |
| Female | 51.5612    |

**Table 4.** Ethnic distribution.[1]

| Age                | Percentage |
|--------------------|------------|
| Hispanic           | 14.0377    |
| Non-hispanic White | 74.3771    |
| Non-hispanic Black | 11.5852    |

**Table 5.** Non-alcoholic fatty liver disease prevalence percentage at start of simulation.[2-10]

| Ethnicity | Steatosis | NASH | Cirrhosis | Hepatocellular carcinoma |
|-----------|-----------|------|-----------|--------------------------|
| Hispanic  | 40.05     | 4.5  | 0.45      | 0.0363                   |
| NH-White  | 26.70     | 3.0  | 0.30      | 0.0242                   |
| NH-Black  | 21.36     | 2.4  | 0.24      | 0.0194                   |

**Table 6.** Hepatocellular carcinoma incidence rate from NASH.[14-25]

| Age               | Incidence rate |
|-------------------|----------------|
| 40 to 44 years    | 3.64216E-05    |
| 45 to 49 years    | 4.64842E-05    |
| 50 to 54 years    | 5.93269E-05    |
| 55 to 59 years    | 7.57179E-05    |
| 60 to 64 years    | 9.66373E-05    |
| 65 to 69 years    | 0.000123336    |
| 70 to 74 years    | 0.000157412    |
| 75 to 79 years    | 0.000200902    |
| 80 years and over | 0.000256408    |

**Table 7.** Hepatocellular carcinoma incidence rate from cirrhosis.[14-25]

| Age               | Incidence rate |
|-------------------|----------------|
| 40 to 44 years    | 0.008844339    |
| 45 to 49 years    | 0.011287867    |
| 50 to 54 years    | 0.014406497    |
| 55 to 59 years    | 0.018386746    |
| 60 to 64 years    | 0.023466665    |
| 65 to 69 years    | 0.029950073    |
| 70 to 74 years    | 0.038224725    |
| 75 to 79 years    | 0.048785512    |
| 80 years and over | 0.062264050    |

**Table 8.** Overweight and obesity prevalence percentages at the start of the simulation.[11]

| Sex    | Ethnicity | Age   | Overweight percentage | Obesity percentage |
|--------|-----------|-------|-----------------------|--------------------|
| Male   | Hispanic  | 20-44 | 39.5                  | 36.8               |
| Male   | Hispanic  | 45-64 | 43.8                  | 41.0               |
| Male   | Hispanic  | 65+   | 42.8                  | 44.7               |
| Male   | White     | 20-44 | 35.7                  | 31.6               |
| Male   | White     | 45-64 | 40.8                  | 39.0               |
| Male   | White     | 65+   | 42.5                  | 36.9               |
| Male   | Black     | 20-44 | 28.7                  | 36.9               |
| Male   | Black     | 45-64 | 34.3                  | 40.6               |
| Male   | Black     | 65+   | 37.0                  | 36.7               |
| Female | Hispanic  | 20-44 | 33.2                  | 36.8               |
| Female | Hispanic  | 45-64 | 32.9                  | 52.9               |
| Female | Hispanic  | 65+   | 33.0                  | 49.3               |
| Female | White     | 20-44 | 25.3                  | 28.0               |
| Female | White     | 45-64 | 32.6                  | 37.4               |
| Female | White     | 65+   | 29.5                  | 44.3               |
| Female | Black     | 20-44 | 22.3                  | 56.1               |
| Female | Black     | 45-64 | 27.1                  | 61.8               |
| Female | Black     | 65+   | 25.8                  | 53.7               |

**Table 9.** Type 2 diabetes prevalence percentage at the start of the simulation.[11]

| Sex    | Ethnicity | Age   | Percentage with T2D |
|--------|-----------|-------|---------------------|
| Male   | Hispanic  | 20-24 | 0.90                |
| Male   | Hispanic  | 25-44 | 3.50                |
| Male   | Hispanic  | 45-54 | 14.20               |
| Male   | Hispanic  | 55-64 | 25.80               |
| Male   | Hispanic  | 65-74 | 32.80               |
| Male   | Hispanic  | 75-84 | 31.30               |
| Male   | Hispanic  | 85+   | 23.80               |
| Male   | NH-White  | 20-24 | 0.90                |
| Male   | NH-White  | 25-44 | 2.40                |
| Male   | NH-White  | 45-54 | 8.20                |
| Male   | NH-White  | 55-64 | 14.70               |
| Male   | NH-White  | 65-74 | 20.10               |
| Male   | NH-White  | 75-84 | 20.50               |
| Male   | NH-White  | 85+   | 17.90               |
| Male   | NH-Black  | 20-24 | 1.00                |
| Male   | NH-Black  | 25-44 | 5.00                |
| Male   | NH-Black  | 45-54 | 15.00               |
| Male   | NH-Black  | 55-64 | 24.00               |
| Male   | NH-Black  | 65-74 | 26.50               |
| Male   | NH-Black  | 75-84 | 39.00               |
| Male   | NH-Black  | 85+   | 18.70               |
| Female | Hispanic  | 20-24 | 0.90                |
| Female | Hispanic  | 25-44 | 3.60                |
| Female | Hispanic  | 45-54 | 10.30               |
| Female | Hispanic  | 55-64 | 24.00               |
| Female | Hispanic  | 65-74 | 34.80               |
| Female | Hispanic  | 75-84 | 32.40               |
| Female | Hispanic  | 85+   | 22.80               |
| Female | NH-White  | 20-24 | 1.20                |
| Female | NH-White  | 25-44 | 2.80                |
| Female | NH-White  | 45-54 | 7.30                |
| Female | NH-White  | 55-64 | 12.10               |
| Female | NH-White  | 65-74 | 17.00               |
| Female | NH-White  | 75-84 | 17.10               |
| Female | NH-White  | 85+   | 12.10               |
| Female | NH-Black  | 20-24 | 1.00                |
| Female | NH-Black  | 25-44 | 5.20                |
| Female | NH-Black  | 45-54 | 10.90               |
| Female | NH-Black  | 55-64 | 24.10               |
| Female | NH-Black  | 65-74 | 32.60               |
| Female | NH-Black  | 75-84 | 31.60               |
| Female | NH-Black  | 85+   | 20.20               |

**Table 10.** Type 2 diabetes incidence rate.[33,34]

| Age   | Incidence rate |
|-------|----------------|
| 20-24 | 0.000447       |
| 25-29 | 0.000762       |
| 30-34 | 0.001090       |
| 35-39 | 0.001625       |
| 40-44 | 0.002880       |
| 45-49 | 0.003575       |
| 50-54 | 0.004957       |
| 55-59 | 0.005071       |
| 60-64 | 0.004662       |
| 65-69 | 0.004450       |
| 70-74 | 0.003925       |
| 75-79 | 0.003609       |
| 80+   | 0.003240       |

For peer review only

**Table 11.** Coronary heart disease prevalence percentage at the start of the simulation.[11]

| Sex    | Ethnicity | Age   | Percentage with CHD |
|--------|-----------|-------|---------------------|
| Male   | Hispanic  | 20-35 | 0.00                |
| Male   | Hispanic  | 35-44 | 1.30                |
| Male   | Hispanic  | 45-54 | 3.90                |
| Male   | Hispanic  | 55-64 | 10.60               |
| Male   | Hispanic  | 65-74 | 19.20               |
| Male   | Hispanic  | 75-84 | 23.50               |
| Male   | Hispanic  | 85+   | 23.80               |
| Male   | NH-White  | 20-35 | 0.00                |
| Male   | NH-White  | 35-44 | 1.20                |
| Male   | NH-White  | 45-54 | 6.00                |
| Male   | NH-White  | 55-64 | 13.80               |
| Male   | NH-White  | 65-74 | 23.30               |
| Male   | NH-White  | 75-84 | 31.80               |
| Male   | NH-White  | 85+   | 38.60               |
| Male   | NH-Black  | 20-35 | 0.00                |
| Male   | NH-Black  | 35-44 | 1.70                |
| Male   | NH-Black  | 45-54 | 7.50                |
| Male   | NH-Black  | 55-64 | 14.20               |
| Male   | NH-Black  | 65-74 | 16.90               |
| Male   | NH-Black  | 75-84 | 22.10               |
| Male   | NH-Black  | 85+   | 18.80               |
| Female | Hispanic  | 20-35 | 0.00                |
| Female | Hispanic  | 35-44 | 1.20                |
| Female | Hispanic  | 45-54 | 3.00                |
| Female | Hispanic  | 55-64 | 6.70                |
| Female | Hispanic  | 65-74 | 16.20               |
| Female | Hispanic  | 75-84 | 20.30               |
| Female | Hispanic  | 85+   | 23.90               |
| Female | NH-White  | 20-35 | 0.00                |
| Female | NH-White  | 35-44 | 0.90                |
| Female | NH-White  | 45-54 | 3.30                |
| Female | NH-White  | 55-64 | 6.70                |
| Female | NH-White  | 65-74 | 11.20               |
| Female | NH-White  | 75-84 | 18.40               |
| Female | NH-White  | 85+   | 24.30               |
| Female | NH-Black  | 20-35 | 0.00                |
| Female | NH-Black  | 35-44 | 1.20                |
| Female | NH-Black  | 45-54 | 5.30                |
| Female | NH-Black  | 55-64 | 11.20               |
| Female | NH-Black  | 65-74 | 17.40               |
| Female | NH-Black  | 75-84 | 19.80               |
| Female | NH-Black  | 85+   | 21.80               |

**Table 12.** Coronary heart disease incidence rate (in %).[30,31]

| Year | <35 | 35-39  | 40-44  | 45-49  | 50-54  | 55-59  | 60-64  | 65-69  | 70-74  | 75-79  | 80-84  | 85+    |
|------|-----|--------|--------|--------|--------|--------|--------|--------|--------|--------|--------|--------|
| 2010 | 0.0 | 0.0516 | 0.0516 | 0.2007 | 0.2007 | 0.3519 | 0.3519 | 0.5869 | 0.5869 | 1.4447 | 1.4447 | 3.0621 |
| 2011 | 0.0 | 0.0508 | 0.0508 | 0.1976 | 0.1976 | 0.3466 | 0.3466 | 0.5781 | 0.5781 | 1.4230 | 1.4230 | 3.0162 |
| 2012 | 0.0 | 0.0501 | 0.0501 | 0.1947 | 0.1947 | 0.3414 | 0.3414 | 0.5694 | 0.5694 | 1.4017 | 1.4017 | 2.9709 |
| 2013 | 0.0 | 0.0493 | 0.0493 | 0.1918 | 0.1918 | 0.3363 | 0.3363 | 0.5609 | 0.5609 | 1.3806 | 1.3806 | 2.9263 |
| 2014 | 0.0 | 0.0486 | 0.0486 | 0.1889 | 0.1889 | 0.3312 | 0.3312 | 0.5525 | 0.5525 | 1.3599 | 1.3599 | 2.8825 |
| 2015 | 0.0 | 0.0478 | 0.0478 | 0.1860 | 0.1860 | 0.3262 | 0.3262 | 0.5442 | 0.5442 | 1.3395 | 1.3395 | 2.8392 |
| 2016 | 0.0 | 0.0471 | 0.0471 | 0.1833 | 0.1833 | 0.3214 | 0.3214 | 0.5360 | 0.5360 | 1.3194 | 1.3194 | 2.7966 |
| 2017 | 0.0 | 0.0464 | 0.0464 | 0.1805 | 0.1805 | 0.3165 | 0.3165 | 0.5280 | 0.5280 | 1.2997 | 1.2997 | 2.7547 |
| 2018 | 0.0 | 0.0457 | 0.0457 | 0.1778 | 0.1778 | 0.3118 | 0.3118 | 0.5201 | 0.5201 | 1.2802 | 1.2802 | 2.7134 |
| 2019 | 0.0 | 0.0450 | 0.0450 | 0.1751 | 0.1751 | 0.3071 | 0.3071 | 0.5123 | 0.5123 | 1.2610 | 1.2610 | 2.6727 |
| 2020 | 0.0 | 0.0444 | 0.0444 | 0.1725 | 0.1725 | 0.3025 | 0.3025 | 0.5046 | 0.5046 | 1.2420 | 1.2420 | 2.6326 |
| 2021 | 0.0 | 0.0437 | 0.0437 | 0.1699 | 0.1699 | 0.2980 | 0.2980 | 0.4970 | 0.4970 | 1.2234 | 1.2234 | 2.5931 |
| 2022 | 0.0 | 0.0430 | 0.0430 | 0.1674 | 0.1674 | 0.2935 | 0.2935 | 0.4896 | 0.4896 | 1.2051 | 1.2051 | 2.5542 |
| 2023 | 0.0 | 0.0424 | 0.0424 | 0.1649 | 0.1649 | 0.2891 | 0.2891 | 0.4822 | 0.4822 | 1.1870 | 1.1870 | 2.5159 |
| 2024 | 0.0 | 0.0418 | 0.0418 | 0.1624 | 0.1624 | 0.2848 | 0.2848 | 0.4750 | 0.4750 | 1.1692 | 1.1692 | 2.4781 |
| 2025 | 0.0 | 0.0411 | 0.0411 | 0.1600 | 0.1600 | 0.2805 | 0.2805 | 0.4679 | 0.4679 | 1.1516 | 1.1516 | 2.4410 |
| 2026 | 0.0 | 0.0405 | 0.0405 | 0.1576 | 0.1576 | 0.2763 | 0.2763 | 0.4608 | 0.4608 | 1.1344 | 1.1344 | 2.4043 |
| 2027 | 0.0 | 0.0399 | 0.0399 | 0.1552 | 0.1552 | 0.2721 | 0.2721 | 0.4539 | 0.4539 | 1.1174 | 1.1174 | 2.3683 |
| 2028 | 0.0 | 0.0393 | 0.0393 | 0.1529 | 0.1529 | 0.2681 | 0.2681 | 0.4471 | 0.4471 | 1.1006 | 1.1006 | 2.3328 |
| 2029 | 0.0 | 0.0387 | 0.0387 | 0.1506 | 0.1506 | 0.2640 | 0.2640 | 0.4404 | 0.4404 | 1.0841 | 1.0841 | 2.2978 |
| 2030 | 0.0 | 0.0381 | 0.0381 | 0.1483 | 0.1483 | 0.2601 | 0.2601 | 0.4338 | 0.4338 | 1.0678 | 1.0678 | 2.2633 |
| 2031 | 0.0 | 0.0376 | 0.0376 | 0.1461 | 0.1461 | 0.2562 | 0.2562 | 0.4273 | 0.4273 | 1.0518 | 1.0518 | 2.2293 |
| 2032 | 0.0 | 0.0370 | 0.0370 | 0.1439 | 0.1439 | 0.2523 | 0.2523 | 0.4209 | 0.4209 | 1.0360 | 1.0360 | 2.1959 |
| 2033 | 0.0 | 0.0364 | 0.0364 | 0.1417 | 0.1417 | 0.2485 | 0.2485 | 0.4146 | 0.4146 | 1.0205 | 1.0205 | 2.1630 |
| 2034 | 0.0 | 0.0359 | 0.0359 | 0.1396 | 0.1396 | 0.2448 | 0.2448 | 0.4084 | 0.4084 | 1.0052 | 1.0052 | 2.1305 |
| 2035 | 0.0 | 0.0354 | 0.0354 | 0.1375 | 0.1375 | 0.2411 | 0.2411 | 0.4022 | 0.4022 | 0.9901 | 0.9901 | 2.0986 |

**Table 13.** Added sugar consumption distributions.[12,13]

| Sex    | Ethnicity          | Consumption group      | % in low vs high risk group |
|--------|--------------------|------------------------|-----------------------------|
| Male   | Hispanic           | Low sugar consumption  | 36.40%                      |
| Male   | Hispanic           | High sugar consumption | 63.60%                      |
| Male   | Non-hispanic White | Low sugar consumption  | 36.40%                      |
| Male   | Non-hispanic White | High sugar consumption | 63.60%                      |
| Male   | Non-hispanic Black | Low sugar consumption  | 34.10%                      |
| Male   | Non-hispanic Black | High sugar consumption | 65.90%                      |
| Female | Hispanic           | Low sugar consumption  | 52.80%                      |
| Female | Hispanic           | High sugar consumption | 47.20%                      |
| Female | Non-hispanic White | Low sugar consumption  | 49.30%                      |
| Female | Non-hispanic White | High sugar consumption | 50.70%                      |
| Female | Non-hispanic Black | Low sugar consumption  | 41.70%                      |
| Female | Non-hispanic Black | High sugar consumption | 58.30%                      |

Table 14. Type 2 diabetes mortality rate.[32-34]

| Age   | Mortality rate |
|-------|----------------|
| 20-24 | 0.006177       |
| 25-29 | 0.009399       |
| 30-34 | 0.009399       |
| 35-39 | 0.009399       |
| 40-44 | 0.009399       |
| 45-49 | 0.013706       |
| 50-54 | 0.013706       |
| 55-59 | 0.020137       |
| 60-64 | 0.020137       |
| 65-69 | 0.031904       |
| 70-74 | 0.031904       |
| 75-79 | 0.068313       |
| 80+   | 0.068313       |

Table 15. Coronary heart disease mortality rate (in %).[30-32]

| Year | <35    | 35-39  | 40-44  | 45-49  | 50-54  | 55-59  | 60-64  | 65-69  | 70-74  | 75-79  | 80-84  | 85+    |
|------|--------|--------|--------|--------|--------|--------|--------|--------|--------|--------|--------|--------|
| 2010 | 0.0000 | 0.5067 | 0.8506 | 0.9493 | 1.3778 | 1.4767 | 1.4179 | 1.1071 | 2.1109 | 2.2865 | 3.9970 | 9.4859 |
| 2011 | 0.0000 | 0.4960 | 0.8327 | 0.9293 | 1.3489 | 1.4457 | 1.3881 | 1.0839 | 2.0665 | 2.2385 | 3.9130 | 9.2867 |
| 2012 | 0.0000 | 0.4856 | 0.8152 | 0.9098 | 1.3205 | 1.4153 | 1.3590 | 1.0611 | 2.0231 | 2.1914 | 3.8309 | 9.0917 |
| 2013 | 0.0000 | 0.4754 | 0.7981 | 0.8907 | 1.2928 | 1.3856 | 1.3304 | 1.0388 | 1.9807 | 2.1454 | 3.7504 | 8.9007 |
| 2014 | 0.0000 | 0.4654 | 0.7813 | 0.8720 | 1.2657 | 1.3565 | 1.3025 | 1.0170 | 1.9391 | 2.1004 | 3.6717 | 8.7138 |
| 2015 | 0.0000 | 0.4557 | 0.7649 | 0.8537 | 1.2391 | 1.3280 | 1.2751 | 0.9956 | 1.8983 | 2.0563 | 3.5946 | 8.5308 |
| 2016 | 0.0000 | 0.4461 | 0.7489 | 0.8358 | 1.2131 | 1.3002 | 1.2484 | 0.9747 | 1.8585 | 2.0131 | 3.5191 | 8.3517 |
| 2017 | 0.0000 | 0.4367 | 0.7331 | 0.8182 | 1.1876 | 1.2728 | 1.2221 | 0.9543 | 1.8195 | 1.9708 | 3.4452 | 8.1763 |
| 2018 | 0.0000 | 0.4275 | 0.7177 | 0.8010 | 1.1626 | 1.2461 | 1.1965 | 0.9342 | 1.7812 | 1.9294 | 3.3728 | 8.0046 |
| 2019 | 0.0000 | 0.4186 | 0.7027 | 0.7842 | 1.1382 | 1.2199 | 1.1714 | 0.9146 | 1.7438 | 1.8889 | 3.3020 | 7.8365 |
| 2020 | 0.0000 | 0.4098 | 0.6879 | 0.7677 | 1.1143 | 1.1943 | 1.1468 | 0.8954 | 1.7072 | 1.8492 | 3.2326 | 7.6719 |
| 2021 | 0.0000 | 0.4012 | 0.6735 | 0.7516 | 1.0909 | 1.1692 | 1.1227 | 0.8766 | 1.6714 | 1.8104 | 3.1648 | 7.5108 |
| 2022 | 0.0000 | 0.3927 | 0.6593 | 0.7358 | 1.0680 | 1.1447 | 1.0991 | 0.8582 | 1.6363 | 1.7724 | 3.0983 | 7.3531 |
| 2023 | 0.0000 | 0.3845 | 0.6455 | 0.7204 | 1.0456 | 1.1207 | 1.0760 | 0.8402 | 1.6019 | 1.7352 | 3.0332 | 7.1987 |
| 2024 | 0.0000 | 0.3764 | 0.6319 | 0.7053 | 1.0236 | 1.0971 | 1.0534 | 0.8225 | 1.5683 | 1.6987 | 2.9695 | 7.0475 |
| 2025 | 0.0000 | 0.3685 | 0.6187 | 0.6905 | 1.0021 | 1.0741 | 1.0313 | 0.8052 | 1.5353 | 1.6631 | 2.9072 | 6.8995 |
| 2026 | 0.0000 | 0.3608 | 0.6057 | 0.6760 | 0.9811 | 1.0515 | 1.0096 | 0.7883 | 1.5031 | 1.6281 | 2.8461 | 6.7546 |
| 2027 | 0.0000 | 0.3532 | 0.5929 | 0.6618 | 0.9605 | 1.0294 | 0.9884 | 0.7718 | 1.4715 | 1.5939 | 2.7864 | 6.6128 |
| 2028 | 0.0000 | 0.3458 | 0.5805 | 0.6479 | 0.9403 | 1.0078 | 0.9677 | 0.7556 | 1.4406 | 1.5605 | 2.7278 | 6.4739 |
| 2029 | 0.0000 | 0.3385 | 0.5683 | 0.6343 | 0.9206 | 0.9867 | 0.9474 | 0.7397 | 1.4104 | 1.5277 | 2.6706 | 6.3380 |
| 2030 | 0.0000 | 0.3314 | 0.5564 | 0.6209 | 0.9012 | 0.9659 | 0.9275 | 0.7242 | 1.3808 | 1.4956 | 2.6145 | 6.2049 |
| 2031 | 0.0000 | 0.3245 | 0.5447 | 0.6079 | 0.8823 | 0.9457 | 0.9080 | 0.7090 | 1.3518 | 1.4642 | 2.5596 | 6.0746 |
| 2032 | 0.0000 | 0.3176 | 0.5332 | 0.5951 | 0.8638 | 0.9258 | 0.8889 | 0.6941 | 1.3234 | 1.4335 | 2.5058 | 5.9470 |
| 2033 | 0.0000 | 0.3110 | 0.5220 | 0.5826 | 0.8456 | 0.9064 | 0.8703 | 0.6795 | 1.2956 | 1.4034 | 2.4532 | 5.8221 |
| 2034 | 0.0000 | 0.3044 | 0.5111 | 0.5704 | 0.8279 | 0.8873 | 0.8520 | 0.6652 | 1.2684 | 1.3739 | 2.4017 | 5.6998 |
| 2035 | 0.0000 | 0.2981 | 0.5004 | 0.5584 | 0.8105 | 0.8687 | 0.8341 | 0.6513 | 1.2417 | 1.3450 | 2.3513 | 5.5801 |

Table 16. Non-disease related mortality rate (in %).[32]

| Year | 20-24 | 25-29 | 30-34 | 35-39 | 40-44 | 45-49 | 50-54 | 55-59 | 60-64 | 65-69 | 70-74 | 75-79 | 80-84 | 85+    |
|------|-------|-------|-------|-------|-------|-------|-------|-------|-------|-------|-------|-------|-------|--------|
| 2010 | 0.086 | 0.093 | 0.105 | 0.128 | 0.178 | 0.275 | 0.411 | 0.583 | 0.822 | 1.242 | 1.909 | 3.038 | 4.952 | 11.162 |
| 2011 | 0.086 | 0.093 | 0.105 | 0.125 | 0.174 | 0.269 | 0.403 | 0.571 | 0.797 | 1.205 | 1.851 | 2.947 | 4.804 | 10.828 |
| 2012 | 0.086 | 0.093 | 0.105 | 0.123 | 0.171 | 0.264 | 0.395 | 0.560 | 0.773 | 1.169 | 1.796 | 2.859 | 4.660 | 10.503 |
| 2013 | 0.086 | 0.093 | 0.105 | 0.120 | 0.167 | 0.259 | 0.387 | 0.548 | 0.750 | 1.133 | 1.742 | 2.773 | 4.520 | 10.188 |
| 2014 | 0.086 | 0.093 | 0.105 | 0.118 | 0.164 | 0.253 | 0.379 | 0.537 | 0.728 | 1.099 | 1.690 | 2.690 | 4.384 | 9.882  |
| 2015 | 0.086 | 0.093 | 0.105 | 0.115 | 0.161 | 0.248 | 0.372 | 0.527 | 0.706 | 1.066 | 1.639 | 2.609 | 4.253 | 9.586  |
| 2016 | 0.086 | 0.093 | 0.105 | 0.113 | 0.158 | 0.243 | 0.364 | 0.516 | 0.685 | 1.034 | 1.590 | 2.531 | 4.125 | 9.298  |
| 2017 | 0.086 | 0.093 | 0.105 | 0.111 | 0.154 | 0.239 | 0.357 | 0.506 | 0.664 | 1.003 | 1.542 | 2.455 | 4.002 | 9.019  |
| 2018 | 0.086 | 0.093 | 0.105 | 0.109 | 0.151 | 0.234 | 0.350 | 0.496 | 0.644 | 0.973 | 1.496 | 2.381 | 3.881 | 8.749  |
| 2019 | 0.086 | 0.093 | 0.105 | 0.106 | 0.148 | 0.229 | 0.343 | 0.486 | 0.625 | 0.944 | 1.451 | 2.310 | 3.765 | 8.486  |
| 2020 | 0.086 | 0.093 | 0.105 | 0.104 | 0.145 | 0.225 | 0.336 | 0.476 | 0.606 | 0.916 | 1.408 | 2.241 | 3.652 | 8.231  |
| 2021 | 0.086 | 0.093 | 0.105 | 0.102 | 0.142 | 0.220 | 0.329 | 0.467 | 0.588 | 0.888 | 1.365 | 2.173 | 3.543 | 7.985  |
| 2022 | 0.086 | 0.093 | 0.105 | 0.100 | 0.140 | 0.216 | 0.323 | 0.457 | 0.570 | 0.862 | 1.324 | 2.108 | 3.436 | 7.745  |
| 2023 | 0.086 | 0.093 | 0.105 | 0.098 | 0.137 | 0.211 | 0.316 | 0.448 | 0.553 | 0.836 | 1.285 | 2.045 | 3.333 | 7.513  |
| 2024 | 0.086 | 0.093 | 0.105 | 0.096 | 0.134 | 0.207 | 0.310 | 0.439 | 0.537 | 0.811 | 1.246 | 1.984 | 3.233 | 7.287  |
| 2025 | 0.086 | 0.093 | 0.105 | 0.094 | 0.131 | 0.203 | 0.304 | 0.430 | 0.521 | 0.786 | 1.209 | 1.924 | 3.136 | 7.069  |
| 2026 | 0.086 | 0.093 | 0.105 | 0.092 | 0.129 | 0.199 | 0.298 | 0.422 | 0.505 | 0.763 | 1.172 | 1.866 | 3.042 | 6.857  |
| 2027 | 0.086 | 0.093 | 0.105 | 0.090 | 0.126 | 0.195 | 0.292 | 0.413 | 0.490 | 0.740 | 1.137 | 1.810 | 2.951 | 6.651  |
| 2028 | 0.086 | 0.093 | 0.105 | 0.089 | 0.124 | 0.191 | 0.286 | 0.405 | 0.475 | 0.718 | 1.103 | 1.756 | 2.862 | 6.451  |
| 2029 | 0.086 | 0.093 | 0.105 | 0.087 | 0.121 | 0.187 | 0.280 | 0.397 | 0.461 | 0.696 | 1.070 | 1.703 | 2.776 | 6.258  |
| 2030 | 0.086 | 0.093 | 0.105 | 0.085 | 0.119 | 0.183 | 0.275 | 0.389 | 0.447 | 0.675 | 1.038 | 1.652 | 2.693 | 6.070  |
| 2031 | 0.086 | 0.093 | 0.105 | 0.083 | 0.116 | 0.180 | 0.269 | 0.381 | 0.434 | 0.655 | 1.007 | 1.603 | 2.612 | 5.888  |
| 2032 | 0.086 | 0.093 | 0.105 | 0.082 | 0.114 | 0.176 | 0.264 | 0.374 | 0.421 | 0.635 | 0.977 | 1.555 | 2.534 | 5.711  |
| 2033 | 0.086 | 0.093 | 0.105 | 0.080 | 0.112 | 0.173 | 0.258 | 0.366 | 0.408 | 0.616 | 0.947 | 1.508 | 2.458 | 5.540  |
| 2034 | 0.086 | 0.093 | 0.105 | 0.079 | 0.110 | 0.169 | 0.253 | 0.359 | 0.396 | 0.598 | 0.919 | 1.463 | 2.384 | 5.374  |
| 2035 | 0.086 | 0.093 | 0.105 | 0.077 | 0.107 | 0.166 | 0.248 | 0.352 | 0.384 | 0.580 | 0.891 | 1.419 | 2.313 | 5.213  |

Table 17. IHME health-adjusted life expectancy and discounted life expectancy for females. [94,95]

| Age of death | WHO HALE | Discounted by 3% | Age of death | WHO HALE | Discounted by 3% |
|--------------|----------|------------------|--------------|----------|------------------|
| 20           | 51.138   | 25.981           | 66           | 15.167   | 12.042           |
| 21           | 51.138   | 25.981           | 67           | 15.167   | 12.042           |
| 22           | 51.138   | 25.981           | 68           | 15.167   | 12.042           |
| 23           | 51.138   | 25.981           | 69           | 15.167   | 12.042           |
| 24           | 51.138   | 25.981           | 70           | 12.020   | 9.968            |
| 25           | 46.766   | 24.966           | 71           | 12.020   | 9.968            |
| 26           | 46.766   | 24.966           | 72           | 12.020   | 9.968            |
| 27           | 46.766   | 24.966           | 73           | 12.020   | 9.968            |
| 28           | 46.766   | 24.966           | 74           | 12.020   | 9.968            |
| 29           | 46.766   | 24.966           | 75           | 9.169    | 7.912            |
| 30           | 42.466   | 23.832           | 76           | 9.169    | 7.912            |
| 31           | 42.466   | 23.832           | 77           | 9.169    | 7.912            |
| 32           | 42.466   | 23.832           | 78           | 9.169    | 7.912            |
| 33           | 42.466   | 23.832           | 79           | 9.169    | 7.912            |
| 34           | 42.466   | 23.832           | 80           | 6.646    | 5.942            |
| 35           | 38.214   | 22.560           | 81           | 6.646    | 5.942            |
| 36           | 38.214   | 22.560           | 82           | 6.646    | 5.942            |
| 37           | 38.214   | 22.560           | 83           | 6.646    | 5.942            |
| 38           | 38.214   | 22.560           | 84           | 6.646    | 5.942            |
| 39           | 38.214   | 22.560           | 85           | 4.512    | 4.159            |
| 40           | 34.033   | 21.144           | 86           | 4.512    | 4.159            |
| 41           | 34.033   | 21.144           | 87           | 4.512    | 4.159            |
| 42           | 34.033   | 21.144           | 88           | 4.512    | 4.159            |
| 43           | 34.033   | 21.144           | 89           | 4.512    | 4.159            |
| 44           | 34.033   | 21.144           | 90           | 2.915    | 2.751            |
| 45           | 29.960   | 19.584           | 91           | 2.915    | 2.751            |
| 46           | 29.960   | 19.584           | 92           | 2.915    | 2.751            |
| 47           | 29.960   | 19.584           | 93           | 2.915    | 2.751            |
| 48           | 29.960   | 19.584           | 94           | 2.915    | 2.751            |
| 49           | 29.960   | 19.584           | 95           | 1.868    | 1.789            |
| 50           | 26.017   | 17.884           | 96           | 1.868    | 1.789            |
| 51           | 26.017   | 17.884           | 97           | 1.868    | 1.789            |
| 52           | 26.017   | 17.884           | 98           | 1.868    | 1.789            |
| 53           | 26.017   | 17.884           | 99           | 1.868    | 1.789            |
| 54           | 26.017   | 17.884           | 100          | 1.231    | 1.189            |
| 55           | 22.214   | 16.045           | 101          | 1.231    | 1.189            |
| 56           | 22.214   | 16.045           | 102          | 1.231    | 1.189            |
| 57           | 22.214   | 16.045           | 103          | 1.231    | 1.189            |
| 58           | 22.214   | 16.045           | 104          | 1.231    | 1.189            |
| 59           | 22.214   | 16.045           | 105          | 1.000    | 0.971            |
| 60           | 18.574   | 14.081           | 106          | 1.000    | 0.971            |
| 61           | 18.574   | 14.081           | 107          | 1.000    | 0.971            |
| 62           | 18.574   | 14.081           | 108          | 1.000    | 0.971            |
| 63           | 18.574   | 14.081           | 109          | 1.000    | 0.971            |
| 64           | 18.574   | 14.081           | 110          | 1.000    | 0.971            |
| 65           | 15.167   | 12.042           |              |          |                  |

**Table 18.** IHME health-adjusted life expectancy and discounted life expectancy for males.[94,95]

| Age of death | WHO HALE | Discounted by 3% | Age of death | WHO HALE | Discounted by 3% |
|--------------|----------|------------------|--------------|----------|------------------|
| 20           | 48.035   | 25.275           | 66           | 13.080   | 10.688           |
| 21           | 48.035   | 25.275           | 67           | 13.080   | 10.688           |
| 22           | 48.035   | 25.275           | 68           | 13.080   | 10.688           |
| 23           | 48.035   | 25.275           | 69           | 13.080   | 10.688           |
| 24           | 48.035   | 25.275           | 70           | 10.208   | 8.680            |
| 25           | 43.802   | 24.200           | 71           | 10.208   | 8.680            |
| 26           | 43.802   | 24.200           | 72           | 10.208   | 8.680            |
| 27           | 43.802   | 24.200           | 73           | 10.208   | 8.680            |
| 28           | 43.802   | 24.200           | 74           | 10.208   | 8.680            |
| 29           | 43.802   | 24.200           | 75           | 7.680    | 6.767            |
| 30           | 39.589   | 22.989           | 76           | 7.680    | 6.767            |
| 31           | 39.589   | 22.989           | 77           | 7.680    | 6.767            |
| 32           | 39.589   | 22.989           | 78           | 7.680    | 6.767            |
| 33           | 39.589   | 22.989           | 79           | 7.680    | 6.767            |
| 34           | 39.589   | 22.989           | 80           | 5.524    | 5.019            |
| 35           | 35.374   | 21.616           | 81           | 5.524    | 5.019            |
| 36           | 35.374   | 21.616           | 82           | 5.524    | 5.019            |
| 37           | 35.374   | 21.616           | 83           | 5.524    | 5.019            |
| 38           | 35.374   | 21.616           | 84           | 5.524    | 5.019            |
| 39           | 35.374   | 21.616           | 85           | 3.723    | 3.471            |
| 40           | 31.217   | 20.085           | 86           | 3.723    | 3.471            |
| 41           | 31.217   | 20.085           | 87           | 3.723    | 3.471            |
| 42           | 31.217   | 20.085           | 88           | 3.723    | 3.471            |
| 43           | 31.217   | 20.085           | 89           | 3.723    | 3.471            |
| 44           | 31.217   | 20.085           | 90           | 2.388    | 2.269            |
| 45           | 27.195   | 18.412           | 91           | 2.388    | 2.269            |
| 46           | 27.195   | 18.412           | 92           | 2.388    | 2.269            |
| 47           | 27.195   | 18.412           | 93           | 2.388    | 2.269            |
| 48           | 27.195   | 18.412           | 94           | 2.388    | 2.269            |
| 49           | 27.195   | 18.412           | 95           | 1.521    | 1.462            |
| 50           | 23.347   | 16.614           | 96           | 1.521    | 1.462            |
| 51           | 23.347   | 16.614           | 97           | 1.521    | 1.462            |
| 52           | 23.347   | 16.614           | 98           | 1.521    | 1.462            |
| 53           | 23.347   | 16.614           | 99           | 1.521    | 1.462            |
| 54           | 23.347   | 16.614           | 100          | 1.000    | 0.971            |
| 55           | 19.705   | 14.714           | 101          | 1.000    | 0.971            |
| 56           | 19.705   | 14.714           | 102          | 1.000    | 0.971            |
| 57           | 19.705   | 14.714           | 103          | 1.000    | 0.971            |
| 58           | 19.705   | 14.714           | 104          | 1.000    | 0.971            |
| 59           | 19.705   | 14.714           | 105          | 1.000    | 0.971            |
| 60           | 16.256   | 12.716           | 106          | 1.000    | 0.971            |
| 61           | 16.256   | 12.716           | 107          | 1.000    | 0.971            |
| 62           | 16.256   | 12.716           | 108          | 1.000    | 0.971            |
| 63           | 16.256   | 12.716           | 109          | 1.000    | 0.971            |
| 64           | 16.256   | 12.716           | 110          | 1.000    | 0.971            |
| 65           | 13.080   | 10.688           |              |          |                  |

## References

1. U.S. Census Bureau, Population Division. Population Estimates. Accessed on <http://www.census.gov/popest/index.html> at Apr 23, 2015.
2. Browning JD, Szczepaniak LS, Dobbins R, Nuremberg P, Horton JD, Cohen JC, et al. Prevalence of hepatic steatosis in an urban population in the United States: impact of ethnicity. *Hepatology*. 2004 Dec;40(6):1387-95.
3. Mahady SE, George J. Management of nonalcoholic steatohepatitis: an evidence-based approach. *Clin Liver Dis*. 2012 Aug;16(3):631-45. doi: 10.1016/j.cld.2012.05.003.
4. Williams CD, Stengel J, Asike MI, Torres DM, Shaw J, Contreras M, et al. Prevalence of non-alcoholic fatty liver disease and nonalcoholic steatohepatitis among a largely middle-aged population utilizing ultrasound and liver biopsy: a prospective study. *Gastroenterology*. 2011 Jan;140(1):124-31. doi: 10.1053/j.gastro.2010.09.038.
5. Chalasani N(1), Younossi Z, Lavine JE, Diehl AM, Brunt EM, Cusi K, et al. The diagnosis and management of non-alcoholic fatty liver disease: practice guideline by the American Gastroenterological Association, American Association for the Study of Liver Diseases, and American College of Gastroenterology. *Gastroenterology*. 2012 Jun;142(7):1592-609. doi: 10.1053/j.gastro.2012.04.001.
6. Adams LA, Lymp JF, St Sauver J, Sanderson SO, Lindor KD, Feldstein A, et al. The natural history of nonalcoholic fatty liver disease: a population-based cohort study. *Gastroenterology*. 2005 Jul;129(1):113-21.
7. Ascha MS, Hanouneh IA, Lopez R, Tamimi TA, Feldstein AF, Zein NN. The incidence and risk factors of hepatocellular carcinoma in patients with nonalcoholic steatohepatitis. *Hepatology*. 2010 Jun;51(6):1972-8. doi: 10.1002/hep.23527.
8. Bambha K, Belt P, Abraham M, Wilson LA, Pabst M, Ferrell L, et al; Nonalcoholic Steatohepatitis Clinical Research Network Research Group. Ethnicity and nonalcoholic fatty liver disease. *Hepatology*. 2012 Mar;55(3):769-80. doi: 10.1002/hep.24726.
9. Michelotti GA, Machado MV, Diehl AM. NAFLD, NASH and liver cancer. *Nat Rev Gastroenterol Hepatol*. 2013 Nov;10(11):656-65. doi: 10.1038/nrgastro.2013.183.
10. Page JM, Harrison SA. NASH and HCC. *Clin Liver Dis*. 2009 Nov;13(4):631-47. doi: 10.1016/j.cld.2009.07.007.
11. Centers for Disease Control and Prevention. National Center for Health Statistics. Health Data Interactive. Accessed at [www.cdc.gov/nchs/hdi.htm](http://www.cdc.gov/nchs/hdi.htm) on Apr 23, 2015.
12. Centers for Disease Control and Prevention. National Center for Health Statistics. National Health and Nutrition Examination Survey Data. Hyattsville, MD: U.S. Department of Health and Human Services, Centers for Disease Control and Prevention. 2005-2012. <http://www.cdc.gov/nchs/nhanes.htm>.
13. Rodriguez LA, Madsen KA, Auinger P, Bremer AA, Lustig RH. Added sugar intake and metabolic syndrome risk in US adolescents: cross-sectional analysis of NHANES 2005-2012. *Journal for Public Health Nutrition*. 2015. [Currently under review].
14. Anstee QM, Targher G, Day CP. Progression of NAFLD to diabetes mellitus, cardiovascular disease or cirrhosis. *Nat Rev Gastroenterol Hepatol*. 2013 Jun;10(6):330-44. doi: 10.1038/nrgastro.2013.41.
15. Bruno S, Maisonneuve P, Castellana P, Rotmensz N, Rossi S, Maggioni M, et al. Incidence and risk factors for non-alcoholic steatohepatitis: prospective study of 5408 women enrolled in Italian tamoxifen chemoprevention trial. *BMJ*. 2005 Apr 23;330(7497):932.
16. Ekstedt M, Franzén LE, Mathiesen UL, Thorelius L, Holmqvist M, Bodemar G, et al. Long-term follow-up of patients with NAFLD and elevated liver enzymes. *Hepatology*. 2006 Oct;44(4):865-73.
17. Haukeland JW, Lorgen I, Schreiner LT, Frigstad SO, Brandsaeter B, Bjørø K, et al. Incidence rates and causes of cirrhosis in a Norwegian population. *Scand J Gastroenterol*. 2007 Dec;42(12):1501-8.
18. Musso G, Cassader M, Bo S, De Michieli F, Gambino R. Sterol regulatory element-binding factor 2 (SREBF-2) predicts 7-year NAFLD incidence and severity of liverdisease and lipoprotein and glucose dysmetabolism. *Diabetes*. 2013 Apr;62(4):1109-20. doi: 10.2337/db12-0858.
19. Omagari K, Kadokawa Y, Masuda J, Egawa I, Sawa T, Hazama H, et al. Fatty liver in non-alcoholic non-overweight Japanese adults: incidence and clinical characteristics. *J Gastroenterol Hepatol*. 2002 Oct;17(10):1098-105.
20. Rafiq N, Bai C, Fang Y, Srishord M, McCullough A, Gramlich T, et al. Long-term follow-up of patients with nonalcoholic fatty liver. *Clin Gastroenterol Hepatol*. 2009 Feb;7(2):234-8. doi: 10.1016/j.cgh.2008.11.005.
21. Wong VW, Wong GL, Yeung DK, Lau TK, Chan CK, Chim AM, et al. Incidence of non-alcoholic fatty liver disease in Hong Kong: a population study with paired proton-magnetic resonance spectroscopy. *J Hepatol*. 2015 Jan;62(1):182-9. doi: 10.1016/j.jhep.2014.08.041.
22. Zelber-Sagi S1, Lotan R, Shlomai A, Webb M, Harrari G, Buch A, et al. Predictors for incidence and remission of NAFLD in the general population during a seven-year prospective follow-up. *J Hepatol*. 2012 May;56(5):1145-51. doi: 10.1016/j.jhep.2011.12.011.
23. Kawamura Y, Arase Y, Ikeda K, Seko Y, Imai N, Hosaka T, et al. Large-scale long-term follow-up study of Japanese patients with non-alcoholic Fatty liver disease for the onset of hepatocellular carcinoma. *Am J Gastroenterol*. 2012 Feb;107(2):253-61. doi: 10.1038/ajg.2011.327.
24. Njei B, Rotman Y, Ditah I, Lim JK. Emerging trends in hepatocellular carcinoma incidence and mortality. *Hepatology*. 2015 Jan;61(1):191-9. doi: 10.1002/hep.27388.
25. El-Serag HB, Mason AC. Rising incidence of hepatocellular carcinoma in the United States. *N Engl J Med*. 1999 Mar 11;340(10):745-50.
26. Lazo M, Hernaez R, Bonekamp S, Kamel IR, Brancati FL, Guallar E, et al. Non-alcoholic fatty liver disease and mortality among US adults: prospective cohort study. *BMJ*. 2011 Nov 18;343:d6891. doi: 10.1136/bmj.d6891.
27. Stepanova M, Rafiq N, Makhlof H, Agrawal R, Kaur I, Younoszai Z, et al. Predictors of all-cause mortality and liver-related mortality in patients with non-alcoholic fatty liver disease (NAFLD). *Dig Dis Sci*. 2013 Oct;58(10):3017-23. doi: 10.1007/s10620-013-2743-5.
28. Söderberg C, Stål P, Askling J, Glaumann H, Lindberg G, Marmur J, et al. Decreased survival of subjects with elevated liver function tests during a 28-year follow-up. *Hepatology*. 2010 Feb;51(2):595-602. doi: 10.1002/hep.23314.
29. Haflidadottir S, Jonasson JG, Norland H, Einarsdottir SO, Kleiner DE, Lund SH. Long-term follow-up and liver-related death rate in patients with non-alcoholic and alcoholic related fatty liverdisease. *BMC Gastroenterol*. 2014 Sep 27;14:166. doi: 10.1186/1471-230X-14-166.
30. National Heart, Lung, and Blood Institute . *Morbidity & Mortality: 2012 Chart Book on Cardiovascular, Lung, and Blood Diseases*. National Institutes of Health. National Heart, Lung, and Blood Institute. 2012.
31. National Heart, Lung, and Blood Institute . *Incidence and Prevalence: 2006 Chart Book on Cardiovascular and Lung Diseases*. National Institutes of Health. National Heart, Lung, and Blood Institute. 2006.
32. Centers for Disease Control and Prevention. National Center for Health Statistics. Underlying Cause of Death 1999-2013 on CDC WONDER Online

- Database, released 2015. Data are from the Multiple Cause of Death Files, 1999-2013, as compiled from data provided by the 57 vital statistics jurisdictions through the Vital Statistics Cooperative Program. Accessed at <http://wonder.cdc.gov/ucd-icd10.html> on Apr 16, 2015.
33. Geiss LS, Wang J, Cheng YJ, Thompson TJ, Barker L, Li Y, et al. Prevalence and incidence trends for diagnosed diabetes among adults aged 20 to 79 years, United States, 1980-2012. *JAMA*. 2014 Sep 24;312(12):1218-26. doi: 10.1001/jama.2014.11494.
  34. Fishman EI, Stokes A, Preston SH. The dynamics of diabetes among birth cohorts in the U.S. *Diabetes Care*. 2014 Apr;37(4):1052-9. doi: 10.2337/dc13-1982.
  35. Daouli J, Davillas A, Demoussis M, Giannakopoulos N. Obesity persistence and duration dependence: evidence from a cohort of US adults (1985-2010). *Econ Hum Biol*. 2014 Jan;12:30-44. doi: 10.1016/j.ehb.2013.07.002.
  36. Gordon-Larsen P, Adair LS, Nelson MC, Popkin BM. Five-year obesity incidence in the transition period between adolescence and adulthood: the National Longitudinal Study of Adolescent Health. *Am J Clin Nutr*. 2004 Sep;80(3):569-75.
  37. Parikh NI, Pencina MJ, Wang TJ, Lanier KJ, Fox CS, D'Agostino RB, et al. Increasing trends in incidence of overweight and obesity over 5 decades. *Am J Med*. 2007 Mar;120(3):242-50.
  38. Williamson DF, Kahn HS, Byers T. The 10-y incidence of obesity and major weight gain in black and white US women aged 30-55 y. *Am J Clin Nutr*. 1991 Jun;53(6 Suppl):1515S-1518S.
  39. Schneider ALC, Lazo M, Selvin E, Clark JM. Racial differences in nonalcoholic fatty liver disease in the U.S. population. *Obesity (Silver Spring)*. 2014;22(1):292-299. doi:10.1002/oby.20426.
  40. Kelishadi R, Cook SR, Adibi A, Faghihimani Z, Ghatrehsamani S, Beihaghi A, et al. Association of the components of the metabolic syndrome with non-alcoholic fatty liver disease among normal-weight, overweight and obese children and adolescents. *Diabetol Metab Syndr*. 2009 Dec 22;1:29. doi: 10.1186/1758-5996-1-29.
  41. Peng L, Wang J, Li F. Weight reduction for non-alcoholic fatty liver disease. *Cochrane Database Syst Rev*. 2011 Jun 15;(6):CD003619. doi: 10.1002/14651858.CD003619.pub3.
  42. Dassanayake AS, Kasturiratne A, Rajindrajith S, Kalubowila U, Chakravarthi S, De Silva AP, et al. Prevalence and risk factors for non-alcoholic fatty liver disease among adults in an urban Sri Lankan population. *J Gastroenterol Hepatol*. 2009 Jul;24(7):1284-8. doi: 10.1111/j.1440-1746.2009.05831.x.
  43. Lee K, Sung JA, Kim JS, Park TJ. The roles of obesity and gender on the relationship between metabolic risk factors and non-alcoholic fatty liver disease in Koreans. *Diabetes Metab Res Rev*. 2009 Feb;25(2):150-5. doi: 10.1002/dmrr.924.
  44. Zeb I, Katz R, Nasir K, Ding J, Rezaeian P, Budoff MJ. Relation of nonalcoholic fatty liver disease to the metabolic syndrome: the Multi-Ethnic Study of Atherosclerosis. *J Cardiovasc Comput Tomogr*. 2013 Sep-Oct;7(5):311-8. doi: 10.1016/j.jcct.2013.08.011.
  45. Chan WK, Tan AT, Vethakkan SR, Tah PC, Vijayanathan A, Goh KL. Non-alcoholic fatty liver disease in diabetics -prevalence and predictive factors in a multiracial hospital clinic population in Malaysia. *J Gastroenterol Hepatol*. 2013 Aug;28(8):1375-83. doi: 10.1111/jgh.12204.
  46. Papandreou D, Karabouta Z, Pantoleon A, Rousso I. Investigation of anthropometric, biochemical and dietary parameters of obese children with and without non-alcoholic fatty liver disease. *Appetite*. 2012 Dec;59(3):939-44. doi: 10.1016/j.appet.2012.09.006.
  47. Abid A, Taha O, Nseir W, Farah R, Grosovski M, Assy N. Soft drink consumption is associated with fatty liver disease independent of metabolic syndrome. *J Hepatol*. 2009 Nov;51(5):918-24. doi: 10.1016/j.jhep.2009.05.033.
  48. Wong VW, Wong GL, Yip GW, Lo AO, Limquiao J, Chu WC, et al. Coronary artery disease and cardiovascular outcomes in patients with non-alcoholic fatty liver disease. *Gut*. 2011 Dec;60(12):1721-7. doi: 10.1136/gut.2011.242016.
  49. Hamaguchi M, Kojima T, Takeda N, Nagata C, Takeda J, Sarui H, et al. Nonalcoholic fatty liver disease is a novel predictor of cardiovascular disease. *World J Gastroenterol*. 2007 Mar 14;13(10):1579-84.
  50. Fan JG, Li F, Cai XB, Peng YD, Ao QH, Gao Y. Effects of nonalcoholic fatty liver disease on the development of metabolic disorders. *J Gastroenterol Hepatol*. 2007; 22, 1086-1091 (2007).
  51. Targher G, Bertolini L, Rodella S, Tessari R, Zenari L, Lippi G, et al. Nonalcoholic fatty liver disease is independently associated with an increased incidence of cardiovascular events in type 2 diabetic patients. *Diabetes Care* 30, 2119-2121 (2007).
  52. Treeprasertsuk S, Leverage S, Adams LA, Lindor KD, St Sauver J, Angulo P. The Framingham risk score and heart disease in nonalcoholic fatty liver disease. *Liver Int*. 32, 945-950 (2012).
  53. Canoy D, Cairns BJ, Balkwill A, Wright FL, Green J, Reeves G, et al. Body mass index and incident coronary heart disease in women: a population-based prospective study. *BMC Med*. 2013 Apr 2;11:87. doi: 10.1186/1741-7015-11-87.
  54. Global Burden of Metabolic Risk Factors for Chronic Diseases Collaboration (BMI Mediated Effects), Lu Y, Hajifathalian K, Ezzati M, Woodward M, Rimm EB, Danaei G. Metabolic mediators of the effects of body-mass index, overweight, and obesity on coronary heart disease and stroke: a pooled analysis of 97 prospective cohorts with 1.8 million participants. *Lancet*. 2014 Mar 15;383(9921):970-83. doi: 10.1016/S0140-6736(13)61836-X.
  55. Gruson E, Montaye M, Kee F, Wagner A, Bingham A, Ruidavets JB, et al. Anthropometric assessment of abdominal obesity and coronary heart disease risk in men: the PRIME study. *Heart*. 2010 Jan;96(2):136-40. doi: 10.1136/hrt.2009.171447.
  56. de Hollander EL, Bogers RP, Boshuizen HC, Rosengren A, Shipley MJ, Knekt P, et al. Influence of calendar period on the association between BMI and coronary heart disease: a meta-analysis of 31 cohorts. *Obesity (Silver Spring)*. 2013 May;21(5):865-80. doi: 10.1002/oby.20043.
  57. Labounty TM, Gomez MJ, Achenbach S, Al-Mallah M, Berman DS, Budoff MJ, et al. Body mass index and the prevalence, severity, and risk of coronary artery disease: an international multicentre study of 13,874 patients. *Eur Heart J Cardiovasc Imaging*. 2013 May;14(5):456-63. doi: 10.1093/ehjci/jes179.
  58. Mongraw-Chaffin ML, Peters SA, Huxley RR, Woodward M. The sex-specific association between BMI and coronary heart disease: a systematic review and meta-analysis of 95 cohorts with 1.2 million participants. *Lancet Diabetes Endocrinol*. 2015 Jun;3(6):437-49. doi: 10.1016/S2213-8587(15)00086-8.
  59. Park YS, Kim JS. Obesity phenotype and coronary heart disease risk as estimated by the Framingham risk score. *J Korean Med Sci*. 2012 Mar;27(3):243-9. doi: 10.3346/jkms.2012.27.3.243.
  60. Taylor AE, Ebrahim S, Ben-Shlomo Y, Martin RM, Whincup PH, Yarnell JW, et al. Comparison of the associations of body mass index and measures of central adiposity and fat mass with coronary heart disease, diabetes, and all-cause mortality: a study using data from 4 UK cohorts. *Am J Clin Nutr*. 2010 Mar;91(3):547-56. doi: 10.3945/ajcn.2009.28757.
  61. Peters SA, Huxley RR, Woodward M. Diabetes as risk factor for incident coronary heart disease in women compared with men: a systematic review and meta-analysis of 64 cohorts including 858,507 individuals and 28,203 coronary events. *Diabetologia*.

- 2014 Aug;57(8):1542-51. doi: 10.1007/s00125-014-3260-6.
62. Shibata M, Kihara Y, Taguchi M, Tashiro M, Otsuki M. Nonalcoholic fatty liver disease is a risk factor for type 2 diabetes in middle-aged Japanese men. *Diabetes Care* 30, 2940–2944 (2007).
  63. Kim CH, Park JY, Lee KU, Kim JH, Kim HK. Fatty liver is an independent risk factor for the development of Type 2 diabetes in Korean adults. *Diabet. Med.* 25, 476–481 (2008).
  64. Yamada T, Fukatsu M, Suzuki S, Wada T, Yoshida T, Joh T. Fatty liver predicts impaired fasting glucose and type 2 diabetes mellitus in Japanese undergoing a health checkup. *J. Gastroenterol. Hepatol.* 25, 352–356 (2010).
  65. Sung KC, Kim SH. Interrelationship between fatty liver and insulin resistance in the development of type 2 diabetes. *J. Clin. Endocrinol. Metab.* 96, 1093–1097 (2011).
  66. Bae JC, Rhee EJ, Lee WY, Park SE, Park CY, Oh KW, et al. Combined effect of nonalcoholic fatty liver disease and impaired fasting glucose on the development of type 2 diabetes: a 4 year retrospective longitudinal study. *Diabetes Care* 34, 727–729 (2011).
  67. Sung KC, Jeong WS, Wild SH, Byrne CD. Combined influence of insulin resistance, overweight/obesity, and fatty liver as risk factors for type 2 diabetes. *Diabetes Care* 35, 717–722 (2012).
  68. Kasturiratne A, Weerasinghe S, Dassanayake AS, Rajindrajith S, de Silva AP, Kato N, et al. Influence of non-alcoholic fatty liver disease on the development of diabetes mellitus. *J Gastroenterol Hepatol.* 2013 Jan;28(1):142-7. doi: 10.1111/j.1440-1746.2012.07264.x.
  69. Abdullah A, Peeters A, de Courten M, Stoelwinder J. The magnitude of association between overweight and obesity and the risk of diabetes: a meta-analysis of prospective cohort studies. *Diabetes Res Clin Pract.* 2010 Sep;89(3):309-19. doi: 10.1016/j.diabetes.2010.04.012.
  70. Nyamdorj R, Qiao Q, Söderberg S, Pitkaniemi JM, Zimmet PZ, Shaw JE, et al. BMI compared with central obesity indicators as a predictor of diabetes incidence in Mauritius. *Obesity (Silver Spring)*. 2009 Feb;17(2):342-8. doi: 10.1038/oby.2008.503.
  71. Rolando L, Byrne DW, McGown PW, Goetzel RZ, Elasy TA, Yarbrough MI. Health risk factor modification predicts incidence of diabetes in an employee population: results of an 8-year longitudinal cohort study. *J Occup Environ Med.* 2013 Apr;55(4):410-5. doi: 10.1097/JOM.0b013e31827cbaec.
  72. Rodbard HW, Bays HE, Gavin JR 3rd, Green AJ, Bazata DD, Lewis SJ, et al. Rate and risk predictors for development of self-reported type-2 diabetes mellitus over a 5-year period: the SHIELD study. *Int J Clin Pract.* 2012 Jul;66(7):684-91. doi: 10.1111/j.1742-1241.2012.02952.x.
  73. Kodama S, Horikawa C, Fujihara K, Yoshizawa S, Yachi Y, Tanaka S, et al. Quantitative relationship between body weight gain in adulthood and incident type 2 diabetes: a meta-analysis. *Obes Rev.* 2014 Mar;15(3):202-14. doi: 10.1111/obr.12129.
  74. Bell JA, Kivimaki M, Hamer M. Metabolically healthy obesity and risk of incident type 2 diabetes: a meta-analysis of prospective cohort studies. *Obes Rev.* 2014 Jun;15(6):504-15. doi: 10.1111/obr.12157.
  75. Guh DP, Zhang W, Bansback N, Amarsi Z, Birmingham CL, Anis AH. The incidence of co-morbidities related to obesity and overweight: a systematic review and meta-analysis. *BMC Public Health.* 2009 Mar 25;9:88. doi: 10.1186/1471-2458-9-88.
  76. Emond JA, Patterson RE, Jardack PM, Arab L. Using doubly labeled water to validate associations between sugar-sweetened beverage intake and body mass among White and African-American adults. *Int J Obes (Lond)*. 2014 Apr;38(4):603-9. doi: 10.1038/ijo.2013.130.
  77. Grimes CA, Riddell LJ, Campbell KJ, Nowson CA. Dietary salt intake, sugar-sweetened beverage consumption, and obesity risk. *Pediatrics.* 2013 Jan;131(1):14-21. doi: 10.1542/peds.2012-1628.
  78. Parikh NI, Gona P, Larson MG, Fox CS, Benjamin EJ, Murabito JM, et al. Long-term trends in myocardial infarction incidence and case fatality in the National Heart, Lung, and Blood Institute's Framingham Heart study. *Circulation.* 2009;119:1203–1210.
  79. Floyd KC, Yarzebski J, Spencer FA, Lessard D, Dalen JE, Alpert JS, et al. A 30-year perspective (1975–2005) into the changing landscape of patients hospitalized with initial acute myocardial infarction: Worcester Heart Attack Study. *Circ Cardiovasc Qual Outcomes.* 2009;2:88–95.
  80. Roger VL, Weston SA, Gerber Y, Killian JM, Dunlay SM, Jaffe AS, et al. Trends in incidence, severity, and outcome of hospitalized myocardial infarction. *Circulation.* 2010;121:863–869.
  81. Yeh RW, Sidney S, Chandra M, Sorel M, Selby JV, Go AS. Population trends in the incidence and outcomes of acute myocardial infarction. *N Engl J Med.* 2010;362:2155–2165.
  82. Foster T, Anania FA, Li D, Katz R, Budoff M. The prevalence and clinical correlates of nonalcoholic fatty liver disease (NAFLD) in African Americans: the multi ethnic study of atherosclerosis (MESA). *Dig Dis Sci.* 2013 Aug;58(8):2392-8. doi: 10.1007/s10620-013-2652-7.
  83. Farrell GC, Larter CZ. Nonalcoholic fatty liver disease: from steatosis to cirrhosis. *Hepatology.* 2006 Feb;43(2 Suppl 1):S99-S112.
  84. Zhang E1, Wartelle-Bladou C, Lepanto L, Lachaine J, Cloutier G, Tang A. Cost-utility analysis of nonalcoholic steatohepatitis screening. *Eur Radiol.* 2015 May 21. [Epub ahead of print]
  85. Baumeister SE1, Völzke H, Marschall P, John U, Schmidt CO, Flessa S, et al. Impact of fatty liver disease on health care utilization and costs in a general population: a 5-year observation. *Gastroenterology.* 2008 Jan;134(1):85-94.
  86. McAdam-Marx C1, McGarry LJ, Hane CA, Biskupiak J, Deniz B, Brixner DI. All-cause and incremental per patient per year cost associated with chronic hepatitis C virus and associated liver complications in the United States: a managed care perspective. *J Manag Care Pharm.* 2011 Sep;17(7):531-46.
  87. Patel D, Terrault NA, Yao FY, Bass NM, Ladaabaum U. Cost-effectiveness of hepatocellular carcinoma surveillance in patients with hepatitis C virus-related cirrhosis. *Clin Gastroenterol Hepatol.* 2005 Jan;3(1):75-84.
  88. Thein HH, Isaranuwatthai W, Campitelli MA, Feld JJ, Yoshida E, Sherman M, et al. Health care costs associated with hepatocellular carcinoma: a population-based study. *Hepatology.* 2013 Oct;58(4):1375-84. doi: 10.1002/hep.26231. Epub 2013 Mar 15.
  89. Lightwood J, Bibbins-Domingo K, Coxson P, Wang YC, Williams L, Goldman L. Forecasting the future economic burden of current adolescent overweight: an estimate of the coronary heart disease policy model. *Am J Public Health.* 2009 Dec;99(12):2230-7. doi: 10.2105/AJPH.2008.152595.
  90. American Diabetes Association. Economic costs of diabetes in the U.S. in 2012. *Diabetes Care.* 2013 Apr;36(4):1033-46. doi: 10.2337/dc12-2625.
  91. Li Q, Blume SW, Huang JC, Hammer M, Graf TR. The Economic Burden of Obesity by Glycemic Stage in the United States. *Pharmacoeconomics.* 2015 Jul;33(7):735-48. doi: 10.1007/s40273-014-0248-5.
  92. Murray CJ, Vos T, Lozano R, Naghavi M, Flaxman AD, Michaud C, et al. Disability-adjusted life years (DALYs) for 291 diseases and injuries in 21 regions, 1990-2010: a systematic analysis for the Global Burden of Disease Study 2010. *Lancet.* 2012 Dec 15;380(9859):2197-223. doi: 10.1016/S0140-6736(12)61689-4.
  93. Keating CL1, Peeters A, Swinburn BA, Magliano DJ, Moodie ML. Utility-based quality of life associated with overweight and obesity: the Australian

- 1  
2  
3 diabetes, obesity, and lifestyle study.  
4 Obesity (Silver Spring). 2013  
5 Mar;21(3):652-5. doi:  
6 10.1002/oby.20290.
94. Global Health Data Exchange. Global  
7 Burden of Disease Study 2010 (GBD  
8 2010) Life Expectancy and Healthy Life  
9
- Expectancy 1970-2010. Institute for  
10 Health Metrics and Evaluation.  
11 Accessed at  
12 <http://ghdx.healthdata.org/record/global-burden-disease-study-2010-gbd-2010-life-expectancy-and-healthy-life-expectancy-1970> on Apr 23, 2015.
95. Murray CJ, Ezzati M, Flaxman AD, Lim S,  
13 Lozano R, Michaud C, GBD 2010: design,  
14 definitions, and metrics. Lancet. 2012  
15 Dec 15;380(9859):2063-6. doi:  
16 10.1016/S0140-6736(12)61899-6.

17  
18  
19  
20  
21  
22  
23  
24  
25  
26  
27  
28  
29  
30  
31  
32  
33  
34  
35  
36  
37  
38  
39  
40  
41  
42  
43  
44  
45  
46  
47  
48  
49  
50  
51  
52  
53  
54  
55  
56  
57  
58  
59  
60

For peer review only

**Additional file 1**

EVEREST Statement: Checklist for health economics paper

|                                                                                                                                                | <b>Study section</b>                         | <b>Additional remarks</b>                                              |
|------------------------------------------------------------------------------------------------------------------------------------------------|----------------------------------------------|------------------------------------------------------------------------|
| <b>Study design</b>                                                                                                                            |                                              |                                                                        |
| (1) The research question is stated                                                                                                            | Introduction                                 | Page 2                                                                 |
| (2) The economic importance of the research question is stated                                                                                 | Introduction                                 | Page 2                                                                 |
| (3) The viewpoint(s) of the analysis are clearly stated and justified                                                                          | Introduction, Methods                        | Page 2 and page 4-5 (interventions)                                    |
| (4) The rationale for choosing the alternative programmes or interventions compared is stated                                                  | Methods                                      | Page 4-5 (interventions)                                               |
| (5) The alternatives being compared are clearly described                                                                                      | Methods                                      | Page 4-5 (interventions)                                               |
| (6) The form of economic evaluation used is stated                                                                                             | Methods                                      | Page 3                                                                 |
| (7) The choice of form of economic evaluation is justified in relation to the questions addressed                                              | Introduction, Methods                        | Page 3                                                                 |
|                                                                                                                                                |                                              |                                                                        |
| <b>Data collection</b>                                                                                                                         |                                              |                                                                        |
| (8) The source(s) of effectiveness estimates used are stated                                                                                   | Methods; Table 1, Table 2                    | Page 5 and 6                                                           |
| (9) Details of the design and results of effectiveness study are given (if based on single study)                                              | N/A                                          | Data derived from peer reviewed literature and national health surveys |
| (10) Details of the method of synthesis or meta-analysis of estimates are given (if based on an overview of a number of effectiveness studies) | Methods                                      | Page 6                                                                 |
| (11) The primary outcome measure(s) for the economic evaluation are clearly stated                                                             | Methods                                      | Page 5                                                                 |
| (12) Methods to value health states and other benefits are stated                                                                              | Methods                                      | Page 5; table 1                                                        |
| (13) Details of the subjects from whom valuations were obtained are given                                                                      | N/A                                          |                                                                        |
| (14) Productivity changes (if included) are reported separately                                                                                | N/A                                          |                                                                        |
| (15) The relevance of productivity changes to the study question is discussed                                                                  | N/A                                          |                                                                        |
| (16) Quantities of resources are reported separately from their unit costs                                                                     | Methods; stated per person; Table 1, Table 2 | Page 5 and 6                                                           |
| (17) Methods for the estimation of quantities and unit costs are described                                                                     | Methods; Table 1, Table 2                    | Page 5 and 6; Adopted from literature                                  |

|                                                                                              |                           |              |
|----------------------------------------------------------------------------------------------|---------------------------|--------------|
| (18) Currency and price data are recorded                                                    | Methods; Table 1, Table 2 | Page 5 and 6 |
| (19) Details of currency of price adjustments for inflation or currency conversion are given | Methods                   | Page 5       |
| (20) Details of any model used are given                                                     | Methods                   | Page 3       |
| (21) The choice of model used and the key parameters on which it is based are justified      | Methods                   | Page 3       |
|                                                                                              |                           |              |
| <b>Analysis and interpretation of results</b>                                                |                           |              |
| (22) Time horizon of costs and benefits is stated                                            | Methods                   | Page 5       |
| (23) The discount rate(s) is stated                                                          | Methods                   | Page 5       |
| (24) The choice of rate(s) is justified                                                      | Methods                   | Page 5       |
| (25) An explanation is given if costs or benefits are not discounted                         | N/A                       |              |
| (26) Details of statistical tests and confidence intervals are given for stochastic data     | N/A                       |              |
| (27) The approach to sensitivity analysis is given                                           | Methods                   | Page 6       |
| (28) The choice of variables for sensitivity analysis is justified                           | Methods; Table 1, Table 2 | Page 6       |
| (29) The ranges over which the variables are varied are stated                               | Table 1, Table 2          | Page 6       |
| (30) Relevant alternatives are compared                                                      | Methods, Results          | Page 4 and 5 |
| (31) Incremental analysis is reported                                                        | N/A                       |              |
| (32) Major outcomes are presented in a disaggregated as well as aggregated form              | Table 3, 4 and 5          | Page 7 and 9 |
| (33) The answer to the study question is given                                               | Discussion, Conclusion    | Page 10      |
| (34) Conclusions follow from the data reported                                               | Conclusion                | Page 11      |
| (35) Conclusions are accompanied by the appropriate caveats                                  | Discussion, Conclusion    | Page 10      |
