# Supplementary material for: Health and economic benefits of reducing sugar intake in the USA, including effects via non-alcoholic fatty liver disease: a microsimulation model
Source: PubMed Central journal article supplement — BMJ Open. 2017 Aug 3;7(8):e013543. doi: 10.1136/bmjopen-2016-013543 (PMC5577881; doi:10.1136/bmjopen-2016-013543), 2017-08-03
Supplement: bmjopen-2016-013543supp001.pdf [file bmjopen-2016-013543supp001.pdf]

## Online supplement

# Non-alcoholic fatty liver disease as a mediator of sugar effects; implications for the health and economic benefits of interventions in the US

*Rick A Vreman, Alex J Goodell, Luis A Rodriguez, Travis C Porco, Robert H Lustig, James G Kahn*

## Content

|                                                                                                        |    |
|--------------------------------------------------------------------------------------------------------|----|
| <b>Table 1.</b> Selected model parameter values and ranges .....                                       | 2  |
| <b>Table 2.</b> Age distribution .....                                                                 | 3  |
| <b>Table 3.</b> Sex distribution.....                                                                  | 4  |
| <b>Table 4.</b> Ethnic distribution .....                                                              | 4  |
| <b>Table 5.</b> Non-alcoholic fatty liver disease prevalence percentage at start of simulation.....    | 4  |
| <b>Table 6.</b> Hepatocellular carcinoma incidence rate from NASH .....                                | 4  |
| <b>Table 7.</b> Hepatocellular carcinoma incidence rate from cirrhosis .....                           | 4  |
| <b>Table 8.</b> Overweight and obesity prevalence percentages at the start of the simulation .....     | 5  |
| <b>Table 9.</b> Type 2 diabetes prevalence percentage at the start of the simulation .....             | 6  |
| <b>Table 10.</b> Type 2 diabetes incidence rate.....                                                   | 7  |
| <b>Table 11.</b> Coronary heart disease prevalence percentage at the start of the simulation .....     | 8  |
| <b>Table 12.</b> Coronary heart disease incidence rate (in %).....                                     | 9  |
| <b>Table 13.</b> Added sugar consumption distributions .....                                           | 9  |
| <b>Table 14.</b> Type 2 diabetes mortality rate .....                                                  | 10 |
| <b>Table 15.</b> Coronary heart disease mortality rate (in %).....                                     | 10 |
| <b>Table 16.</b> Non-disease related mortality rate (in %) .....                                       | 11 |
| <b>Table 17.</b> IHME health-adjusted life expectancy and discounted life expectancy for females ..... | 12 |
| <b>Table 18.</b> IHME health-adjusted life expectancy and discounted life expectancy for males .....   | 13 |
| <b>References</b> .....                                                                                | 14 |

**Table 1.** Selected model parameter values and ranges.

| <b>Parameter</b>                                            |                     |                    |            |            |               |
|-------------------------------------------------------------|---------------------|--------------------|------------|------------|---------------|
| <b>Initialization</b>                                       | <b>Distribution</b> | <b>Mean</b>        | <b>Min</b> | <b>Max</b> | <b>Source</b> |
| Age distribution                                            | Fixed               | OS2*1              | -          | -          | [1]           |
| Sex distribution                                            | Fixed               | OS3*2              | -          | -          | [1]           |
| Ethnicity distribution                                      | Fixed               | OS4*3              | -          | -          | [1]           |
| Steatosis prevalence                                        | Beta                | 27.955%*4          | 18.637%    | 41.933%    | [2-4]         |
| NASH prevalence                                             | Beta                | 3.141%*4           | 2.094%     | 4.712%     | [2-4]         |
| Cirrhosis prevalence                                        | Beta                | 0.314%*4           | 0.209%     | 0.471%     | [5-8]         |
| HCC prevalence                                              | Beta                | 0.025%*4           | 0.017%     | 0.038%     | [9,10]        |
| CHD prevalence                                              | Fixed               | 6.544%*5           | -          | -          | [11]          |
| T2D prevalence                                              | Fixed               | 9.447%*6           | -          | -          | [11]          |
| Overweight prevalence                                       | Fixed               | 33.473%*7          | -          | -          | [11]          |
| Obesity prevalence                                          | Fixed               | 37.391%*8          | -          | -          | [11]          |
| High sugar consumption                                      | Beta                | 57.278%*9          | 38.186%    | 85.917%    | [12,13]       |
| <b>Baseline transition probabilities</b>                    |                     |                    |            |            |               |
|                                                             | <b>Distribution</b> | <b>Mean chance</b> | <b>Min</b> | <b>Max</b> | <b>Source</b> |
| Non-NAFLD -> steatosis                                      | Beta                | 0.0100             | 0.006700   | 0.01500    | [14-22]       |
| Non-NAFLD -> NASH                                           | Beta                | 0.0003             | 0.000201   | 0.00045    | [14-22]       |
| Steatosis -> non-NAFLD                                      | Beta                | 0.0200             | 0.013400   | 0.03000    | [14-22]       |
| Steatosis -> NASH                                           | Beta                | 0.0060             | 0.004020   | 0.00900    | [14-22]       |
| Steatosis -> cirrhosis                                      | Beta                | 0.0002             | 0.000134   | 0.00030    | [14-22]       |
| NASH -> non-NAFLD                                           | Beta                | 0.0010             | 0.000670   | 0.00150    | [14-22]       |
| NASH -> steatosis                                           | Beta                | 0.0200             | 0.013400   | 0.03000    | [14-22]       |
| NASH -> cirrhosis                                           | Beta                | 0.0020             | 0.001340   | 0.00300    | [14-22]       |
| NASH -> HCC                                                 | Beta                | 0.0001*10          | 0.000067   | 0.00015    | [14-25]       |
| NASH -> liver death                                         | Beta                | 0.0038             | 0.002546   | 0.00570    | [26-29]       |
| Cirrhosis -> HCC                                            | Beta                | 0.0200*10          | 0.013400   | 0.03000    | [14-25]       |
| Cirrhosis -> liver death                                    | Beta                | 0.0340             | 0.022780   | 0.05100    | [26-29]       |
| HCC -> liver death                                          | Beta                | 0.5000             | 0.335000   | 0.75000    | [26-29]       |
| Non-CHD -> CHD                                              | Beta                | 0.0045*11          | 0.003015   | 0.00675    | [30,31]       |
| CHD -> CHD death                                            | Beta                | 0.0100*12          | 0.006700   | 0.01500    | [30-32]       |
| Non-T2D -> T2D                                              | Beta                | 0.0045*13          | 0.003015   | 0.00675    | [33,34]       |
| T2D -> T2D death                                            | Beta                | 0.0100*14          | 0.006700   | 0.01500    | [32-34]       |
| Healthy weight -> overweight                                | Beta                | 0.0500             | 0.033500   | 0.07500    | [35-38]       |
| Healthy weight -> obese                                     | Beta                | 0.0060             | 0.004020   | 0.00900    | [35-38]       |
| Overweight -> healthy weight                                | Beta                | 0.0500             | 0.033500   | 0.07500    | [35-38]       |
| Overweight -> obese                                         | Beta                | 0.0180             | 0.012060   | 0.02700    | [35-38]       |
| Obese -> healthy weight                                     | Beta                | 0.0060             | 0.004020   | 0.00900    | [35-38]       |
| Obese -> overweight                                         | Beta                | 0.0350             | 0.023450   | 0.05250    | [35-38]       |
| Each alive state -> non-disease related death               | Beta                | 0.0100*15          | 0.006700   | 0.01500    | [32]          |
| <b>Risk factors</b>                                         |                     |                    |            |            |               |
|                                                             | <b>Distribution</b> | <b>Mean value</b>  | <b>Min</b> | <b>Max</b> | <b>Source</b> |
| NHB ethnicity for progression within NAFLD                  | Beta                | 0.93               | 0.70       | 1.00       | [39]          |
| Hispanic ethnicity for progression within NAFLD             | Beta                | 1.67               | 1.22       | 2.22       | [39]          |
| Overweight for progression within NAFLD                     | Beta                | 2.19               | 1.60       | 3.38       | [15,40-45]    |
| Obesity for progression within NAFLD                        | Beta                | 3.14               | 2.07       | 5.28       | [15,40-45]    |
| High sugar consumption for progression within NAFLD         | Beta                | 2.00               | 1.50       | 3.00       | [46,47]       |
| NAFLD for TP non-CHD -> CHD                                 | Beta                | 2.31               | 1.66       | 3.62       | [48-52]       |
| Overweight for TP non-CHD -> CHD                            | Beta                | 1.22               | 1.12       | 1.32       | [53-60]       |
| Obesity for TP non-CHD -> CHD                               | Beta                | 1.60               | 1.43       | 1.79       | [53-60]       |
| T2D for TP non-CHD -> CHD                                   | Beta                | 2.24               | 1.64       | 3.06       | [61]          |
| NAFLD for TP non-T2D -> T2D                                 | Beta                | 2.73               | 1.87       | 4.46       | [62-68]       |
| Overweight for TP non-T2D -> T2D                            | Beta                | 2.18               | 1.59       | 3.36       | [69-75]       |
| Obesity for TP non-T2D -> T2D                               | Beta                | 3.36               | 2.18       | 5.72       | [69-75]       |
| NAFLD for progression within the BMI chain                  | Beta                | 2.19               | 1.60       | 3.38       | [15,40-45]    |
| High sugar consumption for progression within the BMI chain | Beta                | 2.60               | 1.20       | 6.00       | [76,77]       |
| <b>Regression rates</b>                                     |                     |                    |            |            |               |
|                                                             | <b>Distribution</b> | <b>Mean value</b>  | <b>Min</b> | <b>Max</b> | <b>Source</b> |
| CHD incidence regression rate/year                          | Beta                | 0.985              | 0.970      | 1.00       | [78-81]       |
| CHD mortality regression rate/year                          | Beta                | 0.979              | 0.958      | 1.00       | [78-81]       |
| Non-disease mortality regression rate/year (20-30)          | Beta                | 1.000              | 0.990      | 1.00       | [32]          |
| Non-disease mortality regression rate/year (30-55)          | Beta                | 0.980              | 0.960      | 1.00       | [32]          |
| Non-disease mortality regression rate/year (55+)            | Beta                | 0.970              | 0.940      | 1.00       | [32]          |

| <b>Table 1. Continued</b>                         |                     |                   |            |               |               |
|---------------------------------------------------|---------------------|-------------------|------------|---------------|---------------|
| <b>Costs (annual direct medical, in 2015 USD)</b> | <b>Distribution</b> | <b>Mean value</b> | <b>SD</b>  | <b>Source</b> |               |
| Steatosis                                         | Gamma               | 134               | 50         | [82-85]       |               |
| NASH                                              | Gamma               | 267               | 100        | [82-85]       |               |
| Cirrhosis                                         | Gamma               | 2861              | 1073       | [86]          |               |
| HCC                                               | Gamma               | 42644             | 15992      | [87,88]       |               |
| CHD                                               | Gamma               | 13233             | 4962       | [89]          |               |
| T2D                                               | Gamma               | 8170              | 3064       | [90]          |               |
| Overweight                                        | Gamma               | 343               | 129        | [91]          |               |
| Obesity                                           | Gamma               | 916               | 344        | [91]          |               |
| <b>Disability weights</b>                         | <b>Distribution</b> | <b>Mean value</b> | <b>Min</b> | <b>Max</b>    | <b>Source</b> |
| NASH                                              | Beta                | 0.033             | 0.017      | 0.066         | [3,84]        |
| Cirrhosis                                         | Beta                | 0.194             | 0.127      | 0.273         | [92]          |
| HCC                                               | Beta                | 0.294             | 0.199      | 0.411         | [92]          |
| CHD                                               | Beta                | 0.066             | 0.043      | 0.095         | [92]          |
| T2D                                               | Beta                | 0.150             | 0.080      | 0.220         | [92]          |
| Obesity                                           | Beta                | 0.012             | 0.001      | 0.022         | [93]          |

SD: standard deviation, CHD: coronary heart disease, T2D: type 2 diabetes, NAFLD: non-alcoholic fatty liver disease (steatosis, NASH & cirrhosis), NASH: non-alcoholic steatohepatitis, HCC: hepatocellular carcinoma, Hisp: Hispanic, NHW: non-Hispanic white, NHB: non-Hispanic black, TP: transition probability, OR: odds ratio

\*1 See online supplement table 2. \*2 See online supplement table 3. \*3 See online supplement table 4. \*4 See online supplement table 5. \*5 See online supplement table 6. \*6 See online supplement table 7. \*7 See online supplement table 8. \*8 See online supplement table 9. \*9 See online supplement table 10. \*10 See online supplement table 11. \*11 See online supplement table 12. \*12 See online supplement table 13. \*13 See online supplement table 14. \*14 See online supplement table 15. \*15 See online supplement table 16.

**Table 2. Age distribution.[1]**

| <b>Age</b> | <b>Percentage</b> | <b>Age</b> | <b>Percentage</b> |
|------------|-------------------|------------|-------------------|
| 20         | 1.9194            | 55         | 1.7505            |
| 21         | 1.9194            | 56         | 1.7505            |
| 22         | 1.9194            | 57         | 1.7505            |
| 23         | 1.9194            | 58         | 1.7505            |
| 24         | 1.9194            | 59         | 1.7505            |
| 25         | 1.8701            | 60         | 1.5024            |
| 26         | 1.8701            | 61         | 1.5024            |
| 27         | 1.8701            | 62         | 1.5024            |
| 28         | 1.8701            | 63         | 1.5024            |
| 29         | 1.8701            | 64         | 1.5024            |
| 30         | 1.7749            | 65         | 1.1073            |
| 31         | 1.7749            | 66         | 1.1073            |
| 32         | 1.7749            | 67         | 1.1073            |
| 33         | 1.7749            | 68         | 1.1073            |
| 34         | 1.7749            | 69         | 1.1073            |
| 35         | 1.7757            | 70         | 0.8256            |
| 36         | 1.7757            | 71         | 0.8256            |
| 37         | 1.7757            | 72         | 0.8256            |
| 38         | 1.7757            | 73         | 0.8256            |
| 39         | 1.7757            | 74         | 0.8256            |
| 40         | 1.8487            | 75         | 0.6473            |
| 41         | 1.8487            | 76         | 0.6473            |
| 42         | 1.8487            | 77         | 0.6473            |
| 43         | 1.8487            | 78         | 0.6473            |
| 44         | 1.8487            | 79         | 0.6473            |
| 45         | 2.0018            | 80         | 0.5093            |
| 46         | 2.0018            | 81         | 0.5093            |
| 47         | 2.0018            | 82         | 0.5093            |
| 48         | 2.0018            | 83         | 0.5093            |
| 49         | 2.0018            | 84         | 0.5093            |
| 50         | 1.9767            | 85+        | 2.4517            |
| 51         | 1.9767            |            |                   |
| 52         | 1.9767            |            |                   |
| 53         | 1.9767            |            |                   |
| 54         | 1.9767            |            |                   |

**Table 3.** Sex distribution.[1]

| <b>Sex</b>    | <b>Percentage</b> |
|---------------|-------------------|
| <b>Male</b>   | 48.4388           |
| <b>Female</b> | 51.5612           |

**Table 4.** Ethnic distribution.[1]

| <b>Age</b>                | <b>Percentage</b> |
|---------------------------|-------------------|
| <b>Hispanic</b>           | 14.0377           |
| <b>Non-hispanic White</b> | 74.3771           |
| <b>Non-hispanic Black</b> | 11.5852           |

**Table 5.** Non-alcoholic fatty liver disease prevalence percentage at start of simulation.[2-10]

| <b>Ethnicity</b> | <b>Steatosis</b> | <b>NASH</b> | <b>Cirrhosis</b> | <b>Hepatocellular carcinoma</b> |
|------------------|------------------|-------------|------------------|---------------------------------|
| <b>Hispanic</b>  | 40.05            | 4.5         | 0.45             | 0.0363                          |
| <b>NH-White</b>  | 26.70            | 3.0         | 0.30             | 0.0242                          |
| <b>NH-Black</b>  | 21.36            | 2.4         | 0.24             | 0.0194                          |

**Table 6.** Hepatocellular carcinoma incidence rate from NASH.[14-25]

| <b>Age</b>               | <b>Incidence rate</b> |
|--------------------------|-----------------------|
| <b>40 to 44 years</b>    | 3.64216E-05           |
| <b>45 to 49 years</b>    | 4.64842E-05           |
| <b>50 to 54 years</b>    | 5.93269E-05           |
| <b>55 to 59 years</b>    | 7.57179E-05           |
| <b>60 to 64 years</b>    | 9.66373E-05           |
| <b>65 to 69 years</b>    | 0.000123336           |
| <b>70 to 74 years</b>    | 0.000157412           |
| <b>75 to 79 years</b>    | 0.000200902           |
| <b>80 years and over</b> | 0.000256408           |

**Table 7.** Hepatocellular carcinoma incidence rate from cirrhosis.[14-25]

| <b>Age</b>               | <b>Incidence rate</b> |
|--------------------------|-----------------------|
| <b>40 to 44 years</b>    | 0.008844339           |
| <b>45 to 49 years</b>    | 0.011287867           |
| <b>50 to 54 years</b>    | 0.014406497           |
| <b>55 to 59 years</b>    | 0.018386746           |
| <b>60 to 64 years</b>    | 0.023466665           |
| <b>65 to 69 years</b>    | 0.029950073           |
| <b>70 to 74 years</b>    | 0.038224725           |
| <b>75 to 79 years</b>    | 0.048785512           |
| <b>80 years and over</b> | 0.062264050           |

**Table 8.** Overweight and obesity prevalence percentages at the start of the simulation.[11]

| <b>Sex</b> | <b>Ethnicity</b> | <b>Age</b> | <b>Overweight percentage</b> | <b>Obesity percentage</b> |
|------------|------------------|------------|------------------------------|---------------------------|
| Male       | Hispanic         | 20-44      | 39.5                         | 36.8                      |
| Male       | Hispanic         | 45-64      | 43.8                         | 41.0                      |
| Male       | Hispanic         | 65+        | 42.8                         | 44.7                      |
| Male       | White            | 20-44      | 35.7                         | 31.6                      |
| Male       | White            | 45-64      | 40.8                         | 39.0                      |
| Male       | White            | 65+        | 42.5                         | 36.9                      |
| Male       | Black            | 20-44      | 28.7                         | 36.9                      |
| Male       | Black            | 45-64      | 34.3                         | 40.6                      |
| Male       | Black            | 65+        | 37.0                         | 36.7                      |
| Female     | Hispanic         | 20-44      | 33.2                         | 36.8                      |
| Female     | Hispanic         | 45-64      | 32.9                         | 52.9                      |
| Female     | Hispanic         | 65+        | 33.0                         | 49.3                      |
| Female     | White            | 20-44      | 25.3                         | 28.0                      |
| Female     | White            | 45-64      | 32.6                         | 37.4                      |
| Female     | White            | 65+        | 29.5                         | 44.3                      |
| Female     | Black            | 20-44      | 22.3                         | 56.1                      |
| Female     | Black            | 45-64      | 27.1                         | 61.8                      |
| Female     | Black            | 65+        | 25.8                         | 53.7                      |

**Table 9.** Type 2 diabetes prevalence percentage at the start of the simulation.[11]

| <b>Sex</b> | <b>Ethnicity</b> | <b>Age</b> | <b>Percentage with T2D</b> |
|------------|------------------|------------|----------------------------|
| Male       | Hispanic         | 20-24      | 0.90                       |
| Male       | Hispanic         | 25-44      | 3.50                       |
| Male       | Hispanic         | 45-54      | 14.20                      |
| Male       | Hispanic         | 55-64      | 25.80                      |
| Male       | Hispanic         | 65-74      | 32.80                      |
| Male       | Hispanic         | 75-84      | 31.30                      |
| Male       | Hispanic         | 85+        | 23.80                      |
| Male       | NH-White         | 20-24      | 0.90                       |
| Male       | NH-White         | 25-44      | 2.40                       |
| Male       | NH-White         | 45-54      | 8.20                       |
| Male       | NH-White         | 55-64      | 14.70                      |
| Male       | NH-White         | 65-74      | 20.10                      |
| Male       | NH-White         | 75-84      | 20.50                      |
| Male       | NH-White         | 85+        | 17.90                      |
| Male       | NH-Black         | 20-24      | 1.00                       |
| Male       | NH-Black         | 25-44      | 5.00                       |
| Male       | NH-Black         | 45-54      | 15.00                      |
| Male       | NH-Black         | 55-64      | 24.00                      |
| Male       | NH-Black         | 65-74      | 26.50                      |
| Male       | NH-Black         | 75-84      | 39.00                      |
| Male       | NH-Black         | 85+        | 18.70                      |
| Female     | Hispanic         | 20-24      | 0.90                       |
| Female     | Hispanic         | 25-44      | 3.60                       |
| Female     | Hispanic         | 45-54      | 10.30                      |
| Female     | Hispanic         | 55-64      | 24.00                      |
| Female     | Hispanic         | 65-74      | 34.80                      |
| Female     | Hispanic         | 75-84      | 32.40                      |
| Female     | Hispanic         | 85+        | 22.80                      |
| Female     | NH-White         | 20-24      | 1.20                       |
| Female     | NH-White         | 25-44      | 2.80                       |
| Female     | NH-White         | 45-54      | 7.30                       |
| Female     | NH-White         | 55-64      | 12.10                      |
| Female     | NH-White         | 65-74      | 17.00                      |
| Female     | NH-White         | 75-84      | 17.10                      |
| Female     | NH-White         | 85+        | 12.10                      |
| Female     | NH-Black         | 20-24      | 1.00                       |
| Female     | NH-Black         | 25-44      | 5.20                       |
| Female     | NH-Black         | 45-54      | 10.90                      |
| Female     | NH-Black         | 55-64      | 24.10                      |
| Female     | NH-Black         | 65-74      | 32.60                      |
| Female     | NH-Black         | 75-84      | 31.60                      |
| Female     | NH-Black         | 85+        | 20.20                      |

**Table 10.** Type 2 diabetes incidence rate.[33,34]

| <b>Age</b>   | <b>Incidence rate</b> |
|--------------|-----------------------|
| <b>20-24</b> | 0.000447              |
| <b>25-29</b> | 0.000762              |
| <b>30-34</b> | 0.001090              |
| <b>35-39</b> | 0.001625              |
| <b>40-44</b> | 0.002880              |
| <b>45-49</b> | 0.003575              |
| <b>50-54</b> | 0.004957              |
| <b>55-59</b> | 0.005071              |
| <b>60-64</b> | 0.004662              |
| <b>65-69</b> | 0.004450              |
| <b>70-74</b> | 0.003925              |
| <b>75-79</b> | 0.003609              |
| <b>80+</b>   | 0.003240              |

**Table 11.** Coronary heart disease prevalence percentage at the start of the simulation.[11]

| <b>Sex</b> | <b>Ethnicity</b> | <b>Age</b> | <b>Percentage with CHD</b> |
|------------|------------------|------------|----------------------------|
| Male       | Hispanic         | 20-35      | 0.00                       |
| Male       | Hispanic         | 35-44      | 1.30                       |
| Male       | Hispanic         | 45-54      | 3.90                       |
| Male       | Hispanic         | 55-64      | 10.60                      |
| Male       | Hispanic         | 65-74      | 19.20                      |
| Male       | Hispanic         | 75-84      | 23.50                      |
| Male       | Hispanic         | 85+        | 23.80                      |
| Male       | NH-White         | 20-35      | 0.00                       |
| Male       | NH-White         | 35-44      | 1.20                       |
| Male       | NH-White         | 45-54      | 6.00                       |
| Male       | NH-White         | 55-64      | 13.80                      |
| Male       | NH-White         | 65-74      | 23.30                      |
| Male       | NH-White         | 75-84      | 31.80                      |
| Male       | NH-White         | 85+        | 38.60                      |
| Male       | NH-Black         | 20-35      | 0.00                       |
| Male       | NH-Black         | 35-44      | 1.70                       |
| Male       | NH-Black         | 45-54      | 7.50                       |
| Male       | NH-Black         | 55-64      | 14.20                      |
| Male       | NH-Black         | 65-74      | 16.90                      |
| Male       | NH-Black         | 75-84      | 22.10                      |
| Male       | NH-Black         | 85+        | 18.80                      |
| Female     | Hispanic         | 20-35      | 0.00                       |
| Female     | Hispanic         | 35-44      | 1.20                       |
| Female     | Hispanic         | 45-54      | 3.00                       |
| Female     | Hispanic         | 55-64      | 6.70                       |
| Female     | Hispanic         | 65-74      | 16.20                      |
| Female     | Hispanic         | 75-84      | 20.30                      |
| Female     | Hispanic         | 85+        | 23.90                      |
| Female     | NH-White         | 20-35      | 0.00                       |
| Female     | NH-White         | 35-44      | 0.90                       |
| Female     | NH-White         | 45-54      | 3.30                       |
| Female     | NH-White         | 55-64      | 6.70                       |
| Female     | NH-White         | 65-74      | 11.20                      |
| Female     | NH-White         | 75-84      | 18.40                      |
| Female     | NH-White         | 85+        | 24.30                      |
| Female     | NH-Black         | 20-35      | 0.00                       |
| Female     | NH-Black         | 35-44      | 1.20                       |
| Female     | NH-Black         | 45-54      | 5.30                       |
| Female     | NH-Black         | 55-64      | 11.20                      |
| Female     | NH-Black         | 65-74      | 17.40                      |
| Female     | NH-Black         | 75-84      | 19.80                      |
| Female     | NH-Black         | 85+        | 21.80                      |



**Table 12.** Coronary heart disease incidence rate (in %).[30,31]

| Year | <35 | 35-39  | 40-44  | 45-49  | 50-54  | 55-59  | 60-64  | 65-69  | 70-74  | 75-79  | 80-84  | 85+    |
|------|-----|--------|--------|--------|--------|--------|--------|--------|--------|--------|--------|--------|
| 2010 | 0.0 | 0.0516 | 0.0516 | 0.2007 | 0.2007 | 0.3519 | 0.3519 | 0.5869 | 0.5869 | 1.4447 | 1.4447 | 3.0621 |
| 2011 | 0.0 | 0.0508 | 0.0508 | 0.1976 | 0.1976 | 0.3466 | 0.3466 | 0.5781 | 0.5781 | 1.4230 | 1.4230 | 3.0162 |
| 2012 | 0.0 | 0.0501 | 0.0501 | 0.1947 | 0.1947 | 0.3414 | 0.3414 | 0.5694 | 0.5694 | 1.4017 | 1.4017 | 2.9709 |
| 2013 | 0.0 | 0.0493 | 0.0493 | 0.1918 | 0.1918 | 0.3363 | 0.3363 | 0.5609 | 0.5609 | 1.3806 | 1.3806 | 2.9263 |
| 2014 | 0.0 | 0.0486 | 0.0486 | 0.1889 | 0.1889 | 0.3312 | 0.3312 | 0.5525 | 0.5525 | 1.3599 | 1.3599 | 2.8825 |
| 2015 | 0.0 | 0.0478 | 0.0478 | 0.1860 | 0.1860 | 0.3262 | 0.3262 | 0.5442 | 0.5442 | 1.3395 | 1.3395 | 2.8392 |
| 2016 | 0.0 | 0.0471 | 0.0471 | 0.1833 | 0.1833 | 0.3214 | 0.3214 | 0.5360 | 0.5360 | 1.3194 | 1.3194 | 2.7966 |
| 2017 | 0.0 | 0.0464 | 0.0464 | 0.1805 | 0.1805 | 0.3165 | 0.3165 | 0.5280 | 0.5280 | 1.2997 | 1.2997 | 2.7547 |
| 2018 | 0.0 | 0.0457 | 0.0457 | 0.1778 | 0.1778 | 0.3118 | 0.3118 | 0.5201 | 0.5201 | 1.2802 | 1.2802 | 2.7134 |
| 2019 | 0.0 | 0.0450 | 0.0450 | 0.1751 | 0.1751 | 0.3071 | 0.3071 | 0.5123 | 0.5123 | 1.2610 | 1.2610 | 2.6727 |
| 2020 | 0.0 | 0.0444 | 0.0444 | 0.1725 | 0.1725 | 0.3025 | 0.3025 | 0.5046 | 0.5046 | 1.2420 | 1.2420 | 2.6326 |
| 2021 | 0.0 | 0.0437 | 0.0437 | 0.1699 | 0.1699 | 0.2980 | 0.2980 | 0.4970 | 0.4970 | 1.2234 | 1.2234 | 2.5931 |
| 2022 | 0.0 | 0.0430 | 0.0430 | 0.1674 | 0.1674 | 0.2935 | 0.2935 | 0.4896 | 0.4896 | 1.2051 | 1.2051 | 2.5542 |
| 2023 | 0.0 | 0.0424 | 0.0424 | 0.1649 | 0.1649 | 0.2891 | 0.2891 | 0.4822 | 0.4822 | 1.1870 | 1.1870 | 2.5159 |
| 2024 | 0.0 | 0.0418 | 0.0418 | 0.1624 | 0.1624 | 0.2848 | 0.2848 | 0.4750 | 0.4750 | 1.1692 | 1.1692 | 2.4781 |
| 2025 | 0.0 | 0.0411 | 0.0411 | 0.1600 | 0.1600 | 0.2805 | 0.2805 | 0.4679 | 0.4679 | 1.1516 | 1.1516 | 2.4410 |
| 2026 | 0.0 | 0.0405 | 0.0405 | 0.1576 | 0.1576 | 0.2763 | 0.2763 | 0.4608 | 0.4608 | 1.1344 | 1.1344 | 2.4043 |
| 2027 | 0.0 | 0.0399 | 0.0399 | 0.1552 | 0.1552 | 0.2721 | 0.2721 | 0.4539 | 0.4539 | 1.1174 | 1.1174 | 2.3683 |
| 2028 | 0.0 | 0.0393 | 0.0393 | 0.1529 | 0.1529 | 0.2681 | 0.2681 | 0.4471 | 0.4471 | 1.1006 | 1.1006 | 2.3328 |
| 2029 | 0.0 | 0.0387 | 0.0387 | 0.1506 | 0.1506 | 0.2640 | 0.2640 | 0.4404 | 0.4404 | 1.0841 | 1.0841 | 2.2978 |
| 2030 | 0.0 | 0.0381 | 0.0381 | 0.1483 | 0.1483 | 0.2601 | 0.2601 | 0.4338 | 0.4338 | 1.0678 | 1.0678 | 2.2633 |
| 2031 | 0.0 | 0.0376 | 0.0376 | 0.1461 | 0.1461 | 0.2562 | 0.2562 | 0.4273 | 0.4273 | 1.0518 | 1.0518 | 2.2293 |
| 2032 | 0.0 | 0.0370 | 0.0370 | 0.1439 | 0.1439 | 0.2523 | 0.2523 | 0.4209 | 0.4209 | 1.0360 | 1.0360 | 2.1959 |
| 2033 | 0.0 | 0.0364 | 0.0364 | 0.1417 | 0.1417 | 0.2485 | 0.2485 | 0.4146 | 0.4146 | 1.0205 | 1.0205 | 2.1630 |
| 2034 | 0.0 | 0.0359 | 0.0359 | 0.1396 | 0.1396 | 0.2448 | 0.2448 | 0.4084 | 0.4084 | 1.0052 | 1.0052 | 2.1305 |
| 2035 | 0.0 | 0.0354 | 0.0354 | 0.1375 | 0.1375 | 0.2411 | 0.2411 | 0.4022 | 0.4022 | 0.9901 | 0.9901 | 2.0986 |

**Table 13.** Added sugar consumption distributions.[12,13]

| Sex    | Ethnicity          | Consumption group      | % in low vs high risk group |
|--------|--------------------|------------------------|-----------------------------|
| Male   | Hispanic           | Low sugar consumption  | 36.40%                      |
| Male   | Hispanic           | High sugar consumption | 63.60%                      |
| Male   | Non-hispanic White | Low sugar consumption  | 36.40%                      |
| Male   | Non-hispanic White | High sugar consumption | 63.60%                      |
| Male   | Non-hispanic Black | Low sugar consumption  | 34.10%                      |
| Male   | Non-hispanic Black | High sugar consumption | 65.90%                      |
| Female | Hispanic           | Low sugar consumption  | 52.80%                      |
| Female | Hispanic           | High sugar consumption | 47.20%                      |
| Female | Non-hispanic White | Low sugar consumption  | 49.30%                      |
| Female | Non-hispanic White | High sugar consumption | 50.70%                      |
| Female | Non-hispanic Black | Low sugar consumption  | 41.70%                      |
| Female | Non-hispanic Black | High sugar consumption | 58.30%                      |

**Table 14.** Type 2 diabetes mortality rate.[32-34]

| <b>Age</b>   | <b>Mortality rate</b> |
|--------------|-----------------------|
| <b>20-24</b> | 0.006177              |
| <b>25-29</b> | 0.009399              |
| <b>30-34</b> | 0.009399              |
| <b>35-39</b> | 0.009399              |
| <b>40-44</b> | 0.009399              |
| <b>45-49</b> | 0.013706              |
| <b>50-54</b> | 0.013706              |
| <b>55-59</b> | 0.020137              |
| <b>60-64</b> | 0.020137              |
| <b>65-69</b> | 0.031904              |
| <b>70-74</b> | 0.031904              |
| <b>75-79</b> | 0.068313              |
| <b>80+</b>   | 0.068313              |

**Table 15.** Coronary heart disease mortality rate (in %).[30-32]

| <b>Year</b> | <b>&lt;35</b> | <b>35-39</b> | <b>40-44</b> | <b>45-49</b> | <b>50-54</b> | <b>55-59</b> | <b>60-64</b> | <b>65-69</b> | <b>70-74</b> | <b>75-79</b> | <b>80-84</b> | <b>85+</b> |
|-------------|---------------|--------------|--------------|--------------|--------------|--------------|--------------|--------------|--------------|--------------|--------------|------------|
| <b>2010</b> | 0.0000        | 0.5067       | 0.8506       | 0.9493       | 1.3778       | 1.4767       | 1.4179       | 1.1071       | 2.1109       | 2.2865       | 3.9970       | 9.4859     |
| <b>2011</b> | 0.0000        | 0.4960       | 0.8327       | 0.9293       | 1.3489       | 1.4457       | 1.3881       | 1.0839       | 2.0665       | 2.2385       | 3.9130       | 9.2867     |
| <b>2012</b> | 0.0000        | 0.4856       | 0.8152       | 0.9098       | 1.3205       | 1.4153       | 1.3590       | 1.0611       | 2.0231       | 2.1914       | 3.8309       | 9.0917     |
| <b>2013</b> | 0.0000        | 0.4754       | 0.7981       | 0.8907       | 1.2928       | 1.3856       | 1.3304       | 1.0388       | 1.9807       | 2.1454       | 3.7504       | 8.9007     |
| <b>2014</b> | 0.0000        | 0.4654       | 0.7813       | 0.8720       | 1.2657       | 1.3565       | 1.3025       | 1.0170       | 1.9391       | 2.1004       | 3.6717       | 8.7138     |
| <b>2015</b> | 0.0000        | 0.4557       | 0.7649       | 0.8537       | 1.2391       | 1.3280       | 1.2751       | 0.9956       | 1.8983       | 2.0563       | 3.5946       | 8.5308     |
| <b>2016</b> | 0.0000        | 0.4461       | 0.7489       | 0.8358       | 1.2131       | 1.3002       | 1.2484       | 0.9747       | 1.8585       | 2.0131       | 3.5191       | 8.3517     |
| <b>2017</b> | 0.0000        | 0.4367       | 0.7331       | 0.8182       | 1.1876       | 1.2728       | 1.2221       | 0.9543       | 1.8195       | 1.9708       | 3.4452       | 8.1763     |
| <b>2018</b> | 0.0000        | 0.4275       | 0.7177       | 0.8010       | 1.1626       | 1.2461       | 1.1965       | 0.9342       | 1.7812       | 1.9294       | 3.3728       | 8.0046     |
| <b>2019</b> | 0.0000        | 0.4186       | 0.7027       | 0.7842       | 1.1382       | 1.2199       | 1.1714       | 0.9146       | 1.7438       | 1.8889       | 3.3020       | 7.8365     |
| <b>2020</b> | 0.0000        | 0.4098       | 0.6879       | 0.7677       | 1.1143       | 1.1943       | 1.1468       | 0.8954       | 1.7072       | 1.8492       | 3.2326       | 7.6719     |
| <b>2021</b> | 0.0000        | 0.4012       | 0.6735       | 0.7516       | 1.0909       | 1.1692       | 1.1227       | 0.8766       | 1.6714       | 1.8104       | 3.1648       | 7.5108     |
| <b>2022</b> | 0.0000        | 0.3927       | 0.6593       | 0.7358       | 1.0680       | 1.1447       | 1.0991       | 0.8582       | 1.6363       | 1.7724       | 3.0983       | 7.3531     |
| <b>2023</b> | 0.0000        | 0.3845       | 0.6455       | 0.7204       | 1.0456       | 1.1207       | 1.0760       | 0.8402       | 1.6019       | 1.7352       | 3.0332       | 7.1987     |
| <b>2024</b> | 0.0000        | 0.3764       | 0.6319       | 0.7053       | 1.0236       | 1.0971       | 1.0534       | 0.8225       | 1.5683       | 1.6987       | 2.9695       | 7.0475     |
| <b>2025</b> | 0.0000        | 0.3685       | 0.6187       | 0.6905       | 1.0021       | 1.0741       | 1.0313       | 0.8052       | 1.5353       | 1.6631       | 2.9072       | 6.8995     |
| <b>2026</b> | 0.0000        | 0.3608       | 0.6057       | 0.6760       | 0.9811       | 1.0515       | 1.0096       | 0.7883       | 1.5031       | 1.6281       | 2.8461       | 6.7546     |
| <b>2027</b> | 0.0000        | 0.3532       | 0.5929       | 0.6618       | 0.9605       | 1.0294       | 0.9884       | 0.7718       | 1.4715       | 1.5939       | 2.7864       | 6.6128     |
| <b>2028</b> | 0.0000        | 0.3458       | 0.5805       | 0.6479       | 0.9403       | 1.0078       | 0.9677       | 0.7556       | 1.4406       | 1.5605       | 2.7278       | 6.4739     |
| <b>2029</b> | 0.0000        | 0.3385       | 0.5683       | 0.6343       | 0.9206       | 0.9867       | 0.9474       | 0.7397       | 1.4104       | 1.5277       | 2.6706       | 6.3380     |
| <b>2030</b> | 0.0000        | 0.3314       | 0.5564       | 0.6209       | 0.9012       | 0.9659       | 0.9275       | 0.7242       | 1.3808       | 1.4956       | 2.6145       | 6.2049     |
| <b>2031</b> | 0.0000        | 0.3245       | 0.5447       | 0.6079       | 0.8823       | 0.9457       | 0.9080       | 0.7090       | 1.3518       | 1.4642       | 2.5596       | 6.0746     |
| <b>2032</b> | 0.0000        | 0.3176       | 0.5332       | 0.5951       | 0.8638       | 0.9258       | 0.8889       | 0.6941       | 1.3234       | 1.4335       | 2.5058       | 5.9470     |
| <b>2033</b> | 0.0000        | 0.3110       | 0.5220       | 0.5826       | 0.8456       | 0.9064       | 0.8703       | 0.6795       | 1.2956       | 1.4034       | 2.4532       | 5.8221     |
| <b>2034</b> | 0.0000        | 0.3044       | 0.5111       | 0.5704       | 0.8279       | 0.8873       | 0.8520       | 0.6652       | 1.2684       | 1.3739       | 2.4017       | 5.6998     |
| <b>2035</b> | 0.0000        | 0.2981       | 0.5004       | 0.5584       | 0.8105       | 0.8687       | 0.8341       | 0.6513       | 1.2417       | 1.3450       | 2.3513       | 5.5801     |

**Table 16.** Non-disease related mortality rate (in %).[32]

| Year | 20-24 | 25-29 | 30-34 | 35-39 | 40-44 | 45-49 | 50-54 | 55-59 | 60-64 | 65-69 | 70-74 | 75-79 | 80-84 | 85+    |
|------|-------|-------|-------|-------|-------|-------|-------|-------|-------|-------|-------|-------|-------|--------|
| 2010 | 0.086 | 0.093 | 0.105 | 0.128 | 0.178 | 0.275 | 0.411 | 0.583 | 0.822 | 1.242 | 1.909 | 3.038 | 4.952 | 11.162 |
| 2011 | 0.086 | 0.093 | 0.105 | 0.125 | 0.174 | 0.269 | 0.403 | 0.571 | 0.797 | 1.205 | 1.851 | 2.947 | 4.804 | 10.828 |
| 2012 | 0.086 | 0.093 | 0.105 | 0.123 | 0.171 | 0.264 | 0.395 | 0.560 | 0.773 | 1.169 | 1.796 | 2.859 | 4.660 | 10.503 |
| 2013 | 0.086 | 0.093 | 0.105 | 0.120 | 0.167 | 0.259 | 0.387 | 0.548 | 0.750 | 1.133 | 1.742 | 2.773 | 4.520 | 10.188 |
| 2014 | 0.086 | 0.093 | 0.105 | 0.118 | 0.164 | 0.253 | 0.379 | 0.537 | 0.728 | 1.099 | 1.690 | 2.690 | 4.384 | 9.882  |
| 2015 | 0.086 | 0.093 | 0.105 | 0.115 | 0.161 | 0.248 | 0.372 | 0.527 | 0.706 | 1.066 | 1.639 | 2.609 | 4.253 | 9.586  |
| 2016 | 0.086 | 0.093 | 0.105 | 0.113 | 0.158 | 0.243 | 0.364 | 0.516 | 0.685 | 1.034 | 1.590 | 2.531 | 4.125 | 9.298  |
| 2017 | 0.086 | 0.093 | 0.105 | 0.111 | 0.154 | 0.239 | 0.357 | 0.506 | 0.664 | 1.003 | 1.542 | 2.455 | 4.002 | 9.019  |
| 2018 | 0.086 | 0.093 | 0.105 | 0.109 | 0.151 | 0.234 | 0.350 | 0.496 | 0.644 | 0.973 | 1.496 | 2.381 | 3.881 | 8.749  |
| 2019 | 0.086 | 0.093 | 0.105 | 0.106 | 0.148 | 0.229 | 0.343 | 0.486 | 0.625 | 0.944 | 1.451 | 2.310 | 3.765 | 8.486  |
| 2020 | 0.086 | 0.093 | 0.105 | 0.104 | 0.145 | 0.225 | 0.336 | 0.476 | 0.606 | 0.916 | 1.408 | 2.241 | 3.652 | 8.231  |
| 2021 | 0.086 | 0.093 | 0.105 | 0.102 | 0.142 | 0.220 | 0.329 | 0.467 | 0.588 | 0.888 | 1.365 | 2.173 | 3.543 | 7.985  |
| 2022 | 0.086 | 0.093 | 0.105 | 0.100 | 0.140 | 0.216 | 0.323 | 0.457 | 0.570 | 0.862 | 1.324 | 2.108 | 3.436 | 7.745  |
| 2023 | 0.086 | 0.093 | 0.105 | 0.098 | 0.137 | 0.211 | 0.316 | 0.448 | 0.553 | 0.836 | 1.285 | 2.045 | 3.333 | 7.513  |
| 2024 | 0.086 | 0.093 | 0.105 | 0.096 | 0.134 | 0.207 | 0.310 | 0.439 | 0.537 | 0.811 | 1.246 | 1.984 | 3.233 | 7.287  |
| 2025 | 0.086 | 0.093 | 0.105 | 0.094 | 0.131 | 0.203 | 0.304 | 0.430 | 0.521 | 0.786 | 1.209 | 1.924 | 3.136 | 7.069  |
| 2026 | 0.086 | 0.093 | 0.105 | 0.092 | 0.129 | 0.199 | 0.298 | 0.422 | 0.505 | 0.763 | 1.172 | 1.866 | 3.042 | 6.857  |
| 2027 | 0.086 | 0.093 | 0.105 | 0.090 | 0.126 | 0.195 | 0.292 | 0.413 | 0.490 | 0.740 | 1.137 | 1.810 | 2.951 | 6.651  |
| 2028 | 0.086 | 0.093 | 0.105 | 0.089 | 0.124 | 0.191 | 0.286 | 0.405 | 0.475 | 0.718 | 1.103 | 1.756 | 2.862 | 6.451  |
| 2029 | 0.086 | 0.093 | 0.105 | 0.087 | 0.121 | 0.187 | 0.280 | 0.397 | 0.461 | 0.696 | 1.070 | 1.703 | 2.776 | 6.258  |
| 2030 | 0.086 | 0.093 | 0.105 | 0.085 | 0.119 | 0.183 | 0.275 | 0.389 | 0.447 | 0.675 | 1.038 | 1.652 | 2.693 | 6.070  |
| 2031 | 0.086 | 0.093 | 0.105 | 0.083 | 0.116 | 0.180 | 0.269 | 0.381 | 0.434 | 0.655 | 1.007 | 1.603 | 2.612 | 5.888  |
| 2032 | 0.086 | 0.093 | 0.105 | 0.082 | 0.114 | 0.176 | 0.264 | 0.374 | 0.421 | 0.635 | 0.977 | 1.555 | 2.534 | 5.711  |
| 2033 | 0.086 | 0.093 | 0.105 | 0.080 | 0.112 | 0.173 | 0.258 | 0.366 | 0.408 | 0.616 | 0.947 | 1.508 | 2.458 | 5.540  |
| 2034 | 0.086 | 0.093 | 0.105 | 0.079 | 0.110 | 0.169 | 0.253 | 0.359 | 0.396 | 0.598 | 0.919 | 1.463 | 2.384 | 5.374  |
| 2035 | 0.086 | 0.093 | 0.105 | 0.077 | 0.107 | 0.166 | 0.248 | 0.352 | 0.384 | 0.580 | 0.891 | 1.419 | 2.313 | 5.213  |

**Table 17.** IHME health-adjusted life expectancy and discounted life expectancy for females. [94,95]

| Age of death | WHO HALE | Discounted by 3% | Age of death | WHO HALE | Discounted by 3% |
|--------------|----------|------------------|--------------|----------|------------------|
| 20           | 51.138   | 25.981           | 66           | 15.167   | 12.042           |
| 21           | 51.138   | 25.981           | 67           | 15.167   | 12.042           |
| 22           | 51.138   | 25.981           | 68           | 15.167   | 12.042           |
| 23           | 51.138   | 25.981           | 69           | 15.167   | 12.042           |
| 24           | 51.138   | 25.981           | 70           | 12.020   | 9.968            |
| 25           | 46.766   | 24.966           | 71           | 12.020   | 9.968            |
| 26           | 46.766   | 24.966           | 72           | 12.020   | 9.968            |
| 27           | 46.766   | 24.966           | 73           | 12.020   | 9.968            |
| 28           | 46.766   | 24.966           | 74           | 12.020   | 9.968            |
| 29           | 46.766   | 24.966           | 75           | 9.169    | 7.912            |
| 30           | 42.466   | 23.832           | 76           | 9.169    | 7.912            |
| 31           | 42.466   | 23.832           | 77           | 9.169    | 7.912            |
| 32           | 42.466   | 23.832           | 78           | 9.169    | 7.912            |
| 33           | 42.466   | 23.832           | 79           | 9.169    | 7.912            |
| 34           | 42.466   | 23.832           | 80           | 6.646    | 5.942            |
| 35           | 38.214   | 22.560           | 81           | 6.646    | 5.942            |
| 36           | 38.214   | 22.560           | 82           | 6.646    | 5.942            |
| 37           | 38.214   | 22.560           | 83           | 6.646    | 5.942            |
| 38           | 38.214   | 22.560           | 84           | 6.646    | 5.942            |
| 39           | 38.214   | 22.560           | 85           | 4.512    | 4.159            |
| 40           | 34.033   | 21.144           | 86           | 4.512    | 4.159            |
| 41           | 34.033   | 21.144           | 87           | 4.512    | 4.159            |
| 42           | 34.033   | 21.144           | 88           | 4.512    | 4.159            |
| 43           | 34.033   | 21.144           | 89           | 4.512    | 4.159            |
| 44           | 34.033   | 21.144           | 90           | 2.915    | 2.751            |
| 45           | 29.960   | 19.584           | 91           | 2.915    | 2.751            |
| 46           | 29.960   | 19.584           | 92           | 2.915    | 2.751            |
| 47           | 29.960   | 19.584           | 93           | 2.915    | 2.751            |
| 48           | 29.960   | 19.584           | 94           | 2.915    | 2.751            |
| 49           | 29.960   | 19.584           | 95           | 1.868    | 1.789            |
| 50           | 26.017   | 17.884           | 96           | 1.868    | 1.789            |
| 51           | 26.017   | 17.884           | 97           | 1.868    | 1.789            |
| 52           | 26.017   | 17.884           | 98           | 1.868    | 1.789            |
| 53           | 26.017   | 17.884           | 99           | 1.868    | 1.789            |
| 54           | 26.017   | 17.884           | 100          | 1.231    | 1.189            |
| 55           | 22.214   | 16.045           | 101          | 1.231    | 1.189            |
| 56           | 22.214   | 16.045           | 102          | 1.231    | 1.189            |
| 57           | 22.214   | 16.045           | 103          | 1.231    | 1.189            |
| 58           | 22.214   | 16.045           | 104          | 1.231    | 1.189            |
| 59           | 22.214   | 16.045           | 105          | 1.000    | 0.971            |
| 60           | 18.574   | 14.081           | 106          | 1.000    | 0.971            |
| 61           | 18.574   | 14.081           | 107          | 1.000    | 0.971            |
| 62           | 18.574   | 14.081           | 108          | 1.000    | 0.971            |
| 63           | 18.574   | 14.081           | 109          | 1.000    | 0.971            |
| 64           | 18.574   | 14.081           | 110          | 1.000    | 0.971            |
| 65           | 15.167   | 12.042           |              |          |                  |

**Table 18.** IHME health-adjusted life expectancy and discounted life expectancy for males.[94,95]

| Age of death | WHO HALE | Discounted by 3% | Age of death | WHO HALE | Discounted by 3% |
|--------------|----------|------------------|--------------|----------|------------------|
| 20           | 48.035   | 25.275           | 66           | 13.080   | 10.688           |
| 21           | 48.035   | 25.275           | 67           | 13.080   | 10.688           |
| 22           | 48.035   | 25.275           | 68           | 13.080   | 10.688           |
| 23           | 48.035   | 25.275           | 69           | 13.080   | 10.688           |
| 24           | 48.035   | 25.275           | 70           | 10.208   | 8.680            |
| 25           | 43.802   | 24.200           | 71           | 10.208   | 8.680            |
| 26           | 43.802   | 24.200           | 72           | 10.208   | 8.680            |
| 27           | 43.802   | 24.200           | 73           | 10.208   | 8.680            |
| 28           | 43.802   | 24.200           | 74           | 10.208   | 8.680            |
| 29           | 43.802   | 24.200           | 75           | 7.680    | 6.767            |
| 30           | 39.589   | 22.989           | 76           | 7.680    | 6.767            |
| 31           | 39.589   | 22.989           | 77           | 7.680    | 6.767            |
| 32           | 39.589   | 22.989           | 78           | 7.680    | 6.767            |
| 33           | 39.589   | 22.989           | 79           | 7.680    | 6.767            |
| 34           | 39.589   | 22.989           | 80           | 5.524    | 5.019            |
| 35           | 35.374   | 21.616           | 81           | 5.524    | 5.019            |
| 36           | 35.374   | 21.616           | 82           | 5.524    | 5.019            |
| 37           | 35.374   | 21.616           | 83           | 5.524    | 5.019            |
| 38           | 35.374   | 21.616           | 84           | 5.524    | 5.019            |
| 39           | 35.374   | 21.616           | 85           | 3.723    | 3.471            |
| 40           | 31.217   | 20.085           | 86           | 3.723    | 3.471            |
| 41           | 31.217   | 20.085           | 87           | 3.723    | 3.471            |
| 42           | 31.217   | 20.085           | 88           | 3.723    | 3.471            |
| 43           | 31.217   | 20.085           | 89           | 3.723    | 3.471            |
| 44           | 31.217   | 20.085           | 90           | 2.388    | 2.269            |
| 45           | 27.195   | 18.412           | 91           | 2.388    | 2.269            |
| 46           | 27.195   | 18.412           | 92           | 2.388    | 2.269            |
| 47           | 27.195   | 18.412           | 93           | 2.388    | 2.269            |
| 48           | 27.195   | 18.412           | 94           | 2.388    | 2.269            |
| 49           | 27.195   | 18.412           | 95           | 1.521    | 1.462            |
| 50           | 23.347   | 16.614           | 96           | 1.521    | 1.462            |
| 51           | 23.347   | 16.614           | 97           | 1.521    | 1.462            |
| 52           | 23.347   | 16.614           | 98           | 1.521    | 1.462            |
| 53           | 23.347   | 16.614           | 99           | 1.521    | 1.462            |
| 54           | 23.347   | 16.614           | 100          | 1.000    | 0.971            |
| 55           | 19.705   | 14.714           | 101          | 1.000    | 0.971            |
| 56           | 19.705   | 14.714           | 102          | 1.000    | 0.971            |
| 57           | 19.705   | 14.714           | 103          | 1.000    | 0.971            |
| 58           | 19.705   | 14.714           | 104          | 1.000    | 0.971            |
| 59           | 19.705   | 14.714           | 105          | 1.000    | 0.971            |
| 60           | 16.256   | 12.716           | 106          | 1.000    | 0.971            |
| 61           | 16.256   | 12.716           | 107          | 1.000    | 0.971            |
| 62           | 16.256   | 12.716           | 108          | 1.000    | 0.971            |
| 63           | 16.256   | 12.716           | 109          | 1.000    | 0.971            |
| 64           | 16.256   | 12.716           | 110          | 1.000    | 0.971            |
| 65           | 13.080   | 10.688           |              |          |                  |

## References

1. U.S. Census Bureau, Population Division. Population Estimates. Accessed on <http://www.census.gov/popest/index.html> at Apr 23, 2015.
2. Browning JD, Szczepaniak LS, Dobbins R, Nuremberg P, Horton JD, Cohen JC, et al. Prevalence of hepatic steatosis in an urban population in the United States: impact of ethnicity. *Hepatology*. 2004 Dec;40(6):1387-95.
3. Mahady SE, George J. Management of nonalcoholic steatohepatitis: an evidence-based approach. *Clin Liver Dis*. 2012 Aug;16(3):631-45. doi: 10.1016/j.cld.2012.05.003.
4. Williams CD, Stengel J, Asike MI, Torres DM, Shaw J, Contreras M, et al. Prevalence of non-alcoholic fatty liver disease and nonalcoholic steatohepatitis among a largely middle-aged population utilizing ultrasound and liver biopsy: a prospective study. *Gastroenterology*. 2011 Jan;140(1):124-31. doi: 10.1053/j.gastro.2010.09.038.
5. Chalasani N(1), Younossi Z, Lavine JE, Diehl AM, Brunt EM, Cusi K, et al. The diagnosis and management of non-alcoholic fatty liver disease: practice guideline by the American Gastroenterological Association, American Association for the Study of Liver Diseases, and American College of Gastroenterology. *Gastroenterology*. 2012 Jun;142(7):1592-609. doi: 10.1053/j.gastro.2012.04.001.
6. Adams LA, Lymp JF, St Sauver J, Sanderson SO, Lindor KD, Feldstein A, et al. The natural history of nonalcoholic fatty liver disease: a population-based cohort study. *Gastroenterology*. 2005 Jul;129(1):113-21.
7. Ascha MS, Hanouneh IA, Lopez R, Tamimi TA, Feldstein AF, Zein NN. The incidence and risk factors of hepatocellular carcinoma in patients with nonalcoholic steatohepatitis. *Hepatology*. 2010 Jun;51(6):1972-8. doi: 10.1002/hep.23527.
8. Bambha K, Belt P, Abraham M, Wilson LA, Pabst M, Ferrell L, et al; Nonalcoholic Steatohepatitis Clinical Research Network Research Group. Ethnicity and nonalcoholic fatty liver disease. *Hepatology*. 2012 Mar;55(3):769-80. doi: 10.1002/hep.24726.
9. Michelotti GA, Machado MV, Diehl AM. NAFLD, NASH and liver cancer. *Nat Rev Gastroenterol Hepatol*. 2013 Nov;10(11):656-65. doi: 10.1038/nrgastro.2013.183.
10. Page JM, Harrison SA. NASH and HCC. *Clin Liver Dis*. 2009 Nov;13(4):631-47. doi: 10.1016/j.cld.2009.07.007.
11. Centers for Disease Control and Prevention. National Center for Health Statistics. Health Data Interactive. Accessed at [www.cdc.gov/nchs/hdi.htm](http://www.cdc.gov/nchs/hdi.htm) on Apr 23, 2015.
12. Centers for Disease Control and Prevention. National Center for Health Statistics. National Health and Nutrition Examination Survey Data. Hyattsville, MD: U.S. Department of Health and Human Services, Centers for Disease Control and Prevention. 2005-2012. <http://www.cdc.gov/nchs/nhanes.htm>.
13. Rodriguez LA, Madsen KA, Auinger P, Bremer AA, Lustig RH. Added sugar intake and metabolic syndrome risk in US adolescents: cross-sectional analysis of NHANES 2005-2012. *Journal for Public Health Nutrition*. 2015. [Currently under review].
14. Anstee QM, Targher G, Day CP. Progression of NAFLD to diabetes mellitus, cardiovascular disease or cirrhosis. *Nat Rev Gastroenterol Hepatol*. 2013 Jun;10(6):330-44. doi: 10.1038/nrgastro.2013.41.
15. Bruno S, Maisonneuve P, Castellana P, Rotmensz N, Rossi S, Maggioni M, et al. Incidence and risk factors for non-alcoholic steatohepatitis: prospective study of 5408 women enrolled in Italian tamoxifen chemoprevention trial. *BMJ*. 2005 Apr 23;330(7497):932.
16. Ekstedt M, Franzén LE, Mathiesen UL, Thorelius L, Holmqvist M, Bodemar G, et al. Long-term follow-up of patients with NAFLD and elevated liver enzymes. *Hepatology*. 2006 Oct;44(4):865-73.
17. Haukeland JW, Lorgen I, Schreiner LT, Frigstad SO, Brandsaeter B, Bjørø K, et al. Incidence rates and causes of cirrhosis in a Norwegian population. *Scand J Gastroenterol*. 2007 Dec;42(12):1501-8.
18. Musso G, Cassader M, Bo S, De Michieli F, Gambino R. Sterol regulatory element-binding factor 2 (SREBF-2) predicts 7-year NAFLD incidence and severity of liverdisease and lipoprotein and glucose dysmetabolism. *Diabetes*. 2013 Apr;62(4):1109-20. doi: 10.2337/db12-0858.
19. Omagari K, Kadokawa Y, Masuda J, Egawa I, Sawa T, Hazama H, et al. Fatty liver in non-alcoholic non-overweight Japanese adults: incidence and clinical characteristics. *J Gastroenterol Hepatol*. 2002 Oct;17(10):1098-105.
20. Rafiq N, Bai C, Fang Y, Srishord M, McCullough A, Gramlich T, et al. Long-term follow-up of patients with nonalcoholic fatty liver. *Clin Gastroenterol Hepatol*. 2009 Feb;7(2):234-8. doi: 10.1016/j.cgh.2008.11.005.
21. Wong VW, Wong GL, Yeung DK, Lau TK, Chan CK, Chim AM, et al. Incidence of non-alcoholic fatty liver disease in Hong Kong: a population study with paired proton-magnetic resonance spectroscopy. *J Hepatol*. 2015 Jan;62(1):182-9. doi: 10.1016/j.jhep.2014.08.041.
22. Zelber-Sagi S1, Lotan R, Shlomai A, Webb M, Harrari G, Buch A, et al. Predictors for incidence and remission of NAFLD in the general population during a seven-year prospective follow-up. *J Hepatol*. 2012 May;56(5):1145-51. doi: 10.1016/j.jhep.2011.12.011.
23. Kawamura Y, Arase Y, Ikeda K, Seko Y, Imai N, Hosaka T, et al. Large-scale long-term follow-up study of Japanese patients with non-alcoholic Fatty liver disease for the onset of hepatocellular carcinoma. *Am J Gastroenterol*. 2012 Feb;107(2):253-61. doi: 10.1038/ajg.2011.327.
24. Njei B, Rotman Y, Ditah I, Lim JK. Emerging trends in hepatocellular carcinoma incidence and mortality. *Hepatology*. 2015 Jan;61(1):191-9. doi: 10.1002/hep.27388.
25. El-Serag HB, Mason AC. Rising incidence of hepatocellular carcinoma in the United States. *N Engl J Med*. 1999 Mar 11;340(10):745-50.
26. Lazo M, Hernaez R, Bonekamp S, Kamel IR, Brancati FL, Guallar E, et al. Non-alcoholic fatty liver disease and mortality among US adults: prospective cohort study. *BMJ*. 2011 Nov 18;343:d6891. doi: 10.1136/bmj.d6891.
27. Stepanova M, Rafiq N, Makhlof H, Agrawal R, Kaur I, Younoszai Z, et al. Predictors of all-cause mortality and liver-related mortality in patients with non-alcoholic fatty liver disease (NAFLD). *Dig Dis Sci*. 2013 Oct;58(10):3017-23. doi: 10.1007/s10620-013-2743-5.
28. Söderberg C, Stål P, Askling J, Glaumann H, Lindberg G, Marmur J, et al. Decreased survival of subjects with elevated liver function tests during a 28-year follow-up. *Hepatology*. 2010 Feb;51(2):595-602. doi: 10.1002/hep.23314.
29. Haflidadottir S, Jonasson JG, Norland H, Einarsdottir SO, Kleiner DE, Lund SH. Long-term follow-up and liver-related death rate in patients with non-alcoholic and alcoholic related fatty liverdisease. *BMC Gastroenterol*. 2014 Sep 27;14:166. doi: 10.1186/1471-230X-14-166.
30. National Heart, Lung, and Blood Institute . *Morbidity & Mortality: 2012 Chart Book on Cardiovascular, Lung, and Blood Diseases*. National Institutes of Health. National Heart, Lung, and Blood Institute. 2012.
31. National Heart, Lung, and Blood Institute . *Incidence and Prevalence: 2006 Chart Book on Cardiovascular and Lung Diseases*. National Institutes of Health. National Heart, Lung, and Blood Institute. 2006.
32. Centers for Disease Control and Prevention. National Center for Health Statistics. Underlying Cause of Death 1999-2013 on CDC WONDER Online

- Database, released 2015. Data are from the Multiple Cause of Death Files, 1999-2013, as compiled from data provided by the 57 vital statistics jurisdictions through the Vital Statistics Cooperative Program. Accessed at <http://wonder.cdc.gov/ucd-icd10.html> on Apr 16, 2015.
33. Geiss LS, Wang J, Cheng YJ, Thompson TJ, Barker L, Li Y, et al. Prevalence and incidence trends for diagnosed diabetes among adults aged 20 to 79 years, United States, 1980-2012. *JAMA*. 2014 Sep 24;312(12):1218-26. doi: 10.1001/jama.2014.11494.
  34. Fishman EI, Stokes A, Preston SH. The dynamics of diabetes among birth cohorts in the U.S. *Diabetes Care*. 2014 Apr;37(4):1052-9. doi: 10.2337/dc13-1982.
  35. Daouli J, Davillas A, Demoussis M, Giannakopoulos N. Obesity persistence and duration dependence: evidence from a cohort of US adults (1985-2010). *Econ Hum Biol*. 2014 Jan;12:30-44. doi: 10.1016/j.ehb.2013.07.002.
  36. Gordon-Larsen P, Adair LS, Nelson MC, Popkin BM. Five-year obesity incidence in the transition period between adolescence and adulthood: the National Longitudinal Study of Adolescent Health. *Am J Clin Nutr*. 2004 Sep;80(3):569-75.
  37. Parikh NI, Pencina MJ, Wang TJ, Lanier KJ, Fox CS, D'Agostino RB, et al. Increasing trends in incidence of overweight and obesity over 5 decades. *Am J Med*. 2007 Mar;120(3):242-50.
  38. Williamson DF, Kahn HS, Byers T. The 10-y incidence of obesity and major weight gain in black and white US women aged 30-55 y. *Am J Clin Nutr*. 1991 Jun;53(6 Suppl):1515S-1518S.
  39. Schneider ALC, Lazo M, Selvin E, Clark JM. Racial differences in nonalcoholic fatty liver disease in the U.S. population. *Obesity (Silver Spring)*. 2014;22(1):292-299. doi:10.1002/oby.20426.
  40. Kelishadi R, Cook SR, Adibi A, Faghihimani Z, Ghatrehsamani S, Beihaghi A, et al. Association of the components of the metabolic syndrome with non-alcoholic fatty liver disease among normal-weight, overweight and obese children and adolescents. *Diabetol Metab Syndr*. 2009 Dec 22;1:29. doi: 10.1186/1758-5996-1-29.
  41. Peng L, Wang J, Li F. Weight reduction for non-alcoholic fatty liver disease. *Cochrane Database Syst Rev*. 2011 Jun 15;(6):CD003619. doi: 10.1002/14651858.CD003619.pub3.
  42. Dassanayake AS, Kasturiratne A, Rajindrajith S, Kalubowila U, Chakrawarthi S, De Silva AP, et al. Prevalence and risk factors for non-alcoholic fatty liver disease among adults in an urban Sri Lankan population. *J Gastroenterol Hepatol*. 2009 Jul;24(7):1284-8. doi: 10.1111/j.1440-1746.2009.05831.x.
  43. Lee K, Sung JA, Kim JS, Park TJ. The roles of obesity and gender on the relationship between metabolic risk factors and non-alcoholic fatty liver disease in Koreans. *Diabetes Metab Res Rev*. 2009 Feb;25(2):150-5. doi: 10.1002/dmrr.924.
  44. Zeb I, Katz R, Nasir K, Ding J, Rezaeian P, Budoff MJ. Relation of nonalcoholic fatty liver disease to the metabolic syndrome: the Multi-Ethnic Study of Atherosclerosis. *J Cardiovasc Comput Tomogr*. 2013 Sep-Oct;7(5):311-8. doi: 10.1016/j.jcct.2013.08.011.
  45. Chan WK, Tan AT, Vethakkan SR, Tah PC, Vijayanathan A, Goh KL. Non-alcoholic fatty liver disease in diabetics -prevalence and predictive factors in a multiracial hospital clinic population in Malaysia. *J Gastroenterol Hepatol*. 2013 Aug;28(8):1375-83. doi: 10.1111/jgh.12204.
  46. Papandreou D, Karabouta Z, Pantoleon A, Rousso I. Investigation of anthropometric, biochemical and dietary parameters of obese children with and without non-alcoholic fatty liver disease. *Appetite*. 2012 Dec;59(3):939-44. doi: 10.1016/j.appet.2012.09.006.
  47. Abid A, Taha O, Nseir W, Farah R, Grosovski M, Assy N. Soft drink consumption is associated with fatty liver disease independent of metabolic syndrome. *J Hepatol*. 2009 Nov;51(5):918-24. doi: 10.1016/j.jhep.2009.05.033.
  48. Wong VW, Wong GL, Yip GW, Lo AO, Limquiao J, Chu WC, et al. Coronary artery disease and cardiovascular outcomes in patients with non-alcoholic fatty liver disease. *Gut*. 2011 Dec;60(12):1721-7. doi: 10.1136/gut.2011.242016.
  49. Hamaguchi M, Kojima T, Takeda N, Nagata C, Takeda J, Sarui H, et al. Nonalcoholic fatty liver disease is a novel predictor of cardiovascular disease. *World J Gastroenterol*. 2007 Mar 14;13(10):1579-84.
  50. Fan JG, Li F, Cai XB, Peng YD, Ao QH, Gao Y. Effects of nonalcoholic fatty liver disease on the development of metabolic disorders. *J Gastroenterol Hepatol*. 22, 1086-1091 (2007).
  51. Targher G, Bertolini L, Rodella S, Tessari R, Zenari L, Lippi G, et al. Nonalcoholic fatty liver disease is independently associated with an increased incidence of cardiovascular events in type 2 diabetic patients. *Diabetes Care* 30, 2119-2121 (2007).
  52. Treeprasertsuk S, Leverage S, Adams LA, Lindor KD, St Sauver J, Angulo P. The Framingham risk score and heart disease in nonalcoholic fatty liver disease. *Liver Int*. 32, 945-950 (2012).
  53. Canoy D, Cairns BJ, Balkwill A, Wright FL, Green J, Reeves G, et al. Body mass index and incident coronary heart disease in women: a population-based prospective study. *BMC Med*. 2013 Apr 2;11:87. doi: 10.1186/1741-7015-11-87.
  54. Global Burden of Metabolic Risk Factors for Chronic Diseases Collaboration (BMI Mediated Effects), Lu Y, Hajifathalian K, Ezzati M, Woodward M, Rimm EB, Danaei G. Metabolic mediators of the effects of body-mass index, overweight, and obesity on coronary heart disease and stroke: a pooled analysis of 97 prospective cohorts with 1.8 million participants. *Lancet*. 2014 Mar 15;383(9921):970-83. doi: 10.1016/S0140-6736(13)61836-X.
  55. Gruson E, Montaye M, Kee F, Wagner A, Bingham A, Ruidavets JB, et al. Anthropometric assessment of abdominal obesity and coronary heart disease risk in men: the PRIME study. *Heart*. 2010 Jan;96(2):136-40. doi: 10.1136/hrt.2009.171447.
  56. de Hollander EL, Bogers RP, Boshuizen HC, Rosengren A, Shipley MJ, Knekt P, et al. Influence of calendar period on the association between BMI and coronary heart disease: a meta-analysis of 31 cohorts. *Obesity (Silver Spring)*. 2013 May;21(5):865-80. doi: 10.1002/oby.20043.
  57. Labounty TM, Gomez MJ, Achenbach S, Al-Mallah M, Berman DS, Budoff MJ, et al. Body mass index and the prevalence, severity, and risk of coronary artery disease: an international multicentre study of 13,874 patients. *Eur Heart J Cardiovasc Imaging*. 2013 May;14(5):456-63. doi: 10.1093/ehjci/jes179.
  58. Mongraw-Chaffin ML, Peters SA, Huxley RR, Woodward M. The sex-specific association between BMI and coronary heart disease: a systematic review and meta-analysis of 95 cohorts with 1.2 million participants. *Lancet Diabetes Endocrinol*. 2015 Jun;3(6):437-49. doi: 10.1016/S2213-8587(15)00086-8.
  59. Park YS, Kim JS. Obesity phenotype and coronary heart disease risk as estimated by the Framingham risk score. *J Korean Med Sci*. 2012 Mar;27(3):243-9. doi: 10.3346/jkms.2012.27.3.243.
  60. Taylor AE, Ebrahim S, Ben-Shlomo Y, Martin RM, Whincup PH, Yarnell JW, et al. Comparison of the associations of body mass index and measures of central adiposity and fat mass with coronary heart disease, diabetes, and all-cause mortality: a study using data from 4 UK cohorts. *Am J Clin Nutr*. 2010 Mar;91(3):547-56. doi: 10.3945/ajcn.2009.28757.
  61. Peters SA, Huxley RR, Woodward M. Diabetes as risk factor for incident coronary heart disease in women compared with men: a systematic review and meta-analysis of 64 cohorts including 858,507 individuals and 28,203 coronary events. *Diabetologia*.

- 2014 Aug;57(8):1542-51. doi: 10.1007/s00125-014-3260-6.
62. Shibata M, Kihara Y, Taguchi M, Tashiro M, Otsuki M. Nonalcoholic fatty liver disease is a risk factor for type 2 diabetes in middle-aged Japanese men. *Diabetes Care* 30, 2940–2944 (2007).
  63. Kim CH, Park JY, Lee KU, Kim JH, Kim HK. Fatty liver is an independent risk factor for the development of Type 2 diabetes in Korean adults. *Diabet. Med.* 25, 476–481 (2008).
  64. Yamada T, Fukatsu M, Suzuki S, Wada T, Yoshida T, Joh T. Fatty liver predicts impaired fasting glucose and type 2 diabetes mellitus in Japanese undergoing a health checkup. *J. Gastroenterol. Hepatol.* 25, 352–356 (2010).
  65. Sung KC, Kim SH. Interrelationship between fatty liver and insulin resistance in the development of type 2 diabetes. *J. Clin. Endocrinol. Metab.* 96, 1093–1097 (2011).
  66. Bae JC, Rhee EJ, Lee WY, Park SE, Park CY, Oh KW, et al. Combined effect of nonalcoholic fatty liver disease and impaired fasting glucose on the development of type 2 diabetes: a 4 year retrospective longitudinal study. *Diabetes Care* 34, 727–729 (2011).
  67. Sung KC, Jeong WS, Wild SH, Byrne CD. Combined influence of insulin resistance, overweight/obesity, and fatty liver as risk factors for type 2 diabetes. *Diabetes Care* 35, 717–722 (2012).
  68. Kasturiratne A, Weerasinghe S, Dassanayake AS, Rajindrajith S, de Silva AP, Kato N, et al. Influence of non-alcoholic fatty liver disease on the development of diabetes mellitus. *J Gastroenterol Hepatol.* 2013 Jan;28(1):142-7. doi: 10.1111/j.1440-1746.2012.07264.x.
  69. Abdullah A, Peeters A, de Courten M, Stoelwinder J. The magnitude of association between overweight and obesity and the risk of diabetes: a meta-analysis of prospective cohort studies. *Diabetes Res Clin Pract.* 2010 Sep;89(3):309-19. doi: 10.1016/j.diabetes.2010.04.012.
  70. Nyamdorj R, Qiao Q, Söderberg S, Pitkaniemi JM, Zimmet PZ, Shaw JE, et al. BMI compared with central obesity indicators as a predictor of diabetes incidence in Mauritius. *Obesity (Silver Spring)*. 2009 Feb;17(2):342-8. doi: 10.1038/oby.2008.503.
  71. Rolando L, Byrne DW, McGown PW, Goetzl RZ, Elasy TA, Yarbrough MI. Health risk factor modification predicts incidence of diabetes in an employee population: results of an 8-year longitudinal cohort study. *J Occup Environ Med.* 2013 Apr;55(4):410-5. doi: 10.1097/JOM.0b013e31827cbaec.
  72. Rodbard HW, Bays HE, Gavin JR 3rd, Green AJ, Bazata DD, Lewis SJ, et al. Rate and risk predictors for development of self-reported type-2 diabetes mellitus over a 5-year period: the SHIELD study. *Int J Clin Pract.* 2012 Jul;66(7):684-91. doi: 10.1111/j.1742-1241.2012.02952.x.
  73. Kodama S, Horikawa C, Fujihara K, Yoshizawa S, Yachi Y, Tanaka S, et al. Quantitative relationship between body weight gain in adulthood and incident type 2 diabetes: a meta-analysis. *Obes Rev.* 2014 Mar;15(3):202-14. doi: 10.1111/obr.12129.
  74. Bell JA, Kivimaki M, Hamer M. Metabolically healthy obesity and risk of incident type 2 diabetes: a meta-analysis of prospective cohort studies. *Obes Rev.* 2014 Jun;15(6):504-15. doi: 10.1111/obr.12157.
  75. Guh DP, Zhang W, Bansback N, Amarsi Z, Birmingham CL, Anis AH. The incidence of co-morbidities related to obesity and overweight: a systematic review and meta-analysis. *BMC Public Health.* 2009 Mar 25;9:88. doi: 10.1186/1471-2458-9-88.
  76. Emond JA, Patterson RE, Jardack PM, Arab L. Using doubly labeled water to validate associations between sugar-sweetened beverage intake and body mass among White and African-American adults. *Int J Obes (Lond)*. 2014 Apr;38(4):603-9. doi: 10.1038/ijo.2013.130.
  77. Grimes CA, Riddell LJ, Campbell KJ, Nowson CA. Dietary salt intake, sugar-sweetened beverage consumption, and obesity risk. *Pediatrics.* 2013 Jan;131(1):14-21. doi: 10.1542/peds.2012-1628.
  78. Parikh NI, Gona P, Larson MG, Fox CS, Benjamin EJ, Murabito JM, et al. Long-term trends in myocardial infarction incidence and case fatality in the National Heart, Lung, and Blood Institute's Framingham Heart study. *Circulation.* 2009;119:1203–1210.
  79. Floyd KC, Yarzebski J, Spencer FA, Lessard D, Dalen JE, Alpert JS, et al. A 30-year perspective (1975–2005) into the changing landscape of patients hospitalized with initial acute myocardial infarction: Worcester Heart Attack Study. *Circ Cardiovasc Qual Outcomes.* 2009;2:88–95.
  80. Roger VL, Weston SA, Gerber Y, Killian JM, Dunlay SM, Jaffe AS, et al. Trends in incidence, severity, and outcome of hospitalized myocardial infarction. *Circulation.* 2010;121:863–869.
  81. Yeh RW, Sidney S, Chandra M, Sorel M, Selby JV, Go AS. Population trends in the incidence and outcomes of acute myocardial infarction. *N Engl J Med.* 2010;362:2155–2165.
  82. Foster T, Anania FA, Li D, Katz R, Budoff M. The prevalence and clinical correlates of nonalcoholic fatty liver disease (NAFLD) in African Americans: the multi ethnic study of atherosclerosis (MESA). *Dig Dis Sci.* 2013 Aug;58(8):2392-8. doi: 10.1007/s10620-013-2652-7.
  83. Farrell GC, Larter CZ. Nonalcoholic fatty liver disease: from steatosis to cirrhosis. *Hepatology.* 2006 Feb;43(2 Suppl 1):S99-S112.
  84. Zhang E1, Wartelle-Bladou C, Lepanto L, Lachaine J, Cloutier G, Tang A. Cost-utility analysis of nonalcoholic steatohepatitis screening. *Eur Radiol.* 2015 May 21. [Epub ahead of print]
  85. Baumeister SE1, Völzke H, Marschall P, John U, Schmidt CO, Flessa S, et al. Impact of fatty liver disease on health care utilization and costs in a general population: a 5-year observation. *Gastroenterology.* 2008 Jan;134(1):85-94.
  86. McAdam-Marx C1, McGarry LJ, Hane CA, Biskupiak J, Deniz B, Brixner DI. All-cause and incremental per patient per year cost associated with chronic hepatitis C virus and associated liver complications in the United States: a managed care perspective. *J Manag Care Pharm.* 2011 Sep;17(7):531-46.
  87. Patel D, Terrault NA, Yao FY, Bass NM, Ladaabaum U. Cost-effectiveness of hepatocellular carcinoma surveillance in patients with hepatitis C virus-related cirrhosis. *Clin Gastroenterol Hepatol.* 2005 Jan;3(1):75-84.
  88. Thein HH, Isaranuwatthai W, Campitelli MA, Feld JJ, Yoshida E, Sherman M, et al. Health care costs associated with hepatocellular carcinoma: a population-based study. *Hepatology.* 2013 Oct;58(4):1375-84. doi: 10.1002/hep.26231. Epub 2013 Mar 15.
  89. Lightwood J, Bibbins-Domingo K, Coxson P, Wang YC, Williams L, Goldman L. Forecasting the future economic burden of current adolescent overweight: an estimate of the coronary heart disease policy model. *Am J Public Health.* 2009 Dec;99(12):2230-7. doi: 10.2105/AJPH.2008.152595.
  90. American Diabetes Association. Economic costs of diabetes in the U.S. in 2012. *Diabetes Care.* 2013 Apr;36(4):1033-46. doi: 10.2337/dc12-2625.
  91. Li Q, Blume SW, Huang JC, Hammer M, Graf TR. The Economic Burden of Obesity by Glycemic Stage in the United States. *Pharmacoeconomics.* 2015 Jul;33(7):735-48. doi: 10.1007/s40273-014-0248-5.
  92. Murray CJ, Vos T, Lozano R, Naghavi M, Flaxman AD, Michaud C, et al. Disability-adjusted life years (DALYs) for 291 diseases and injuries in 21 regions, 1990-2010: a systematic analysis for the Global Burden of Disease Study 2010. *Lancet.* 2012 Dec 15;380(9859):2197-223. doi: 10.1016/S0140-6736(12)61689-4.
  93. Keating CL1, Peeters A, Swinburn BA, Magliano DJ, Moodie ML. Utility-based quality of life associated with overweight and obesity: the Australian



- diabetes, obesity, and lifestyle study. Obesity (Silver Spring). 2013 Mar;21(3):652-5. doi: 10.1002/oby.20290.
94. Global Health Data Exchange. Global Burden of Disease Study 2010 (GBD 2010) Life Expectancy and Healthy Life Expectancy 1970-2010. Institute for Health Metrics and Evaluation. Accessed at <http://ghdx.healthdata.org/record/global-burden-disease-study-2010-gbd-2010-life-expectancy-and-healthy-life-expectancy-1970> on Apr 23, 2015.
95. Murray CJ, Ezzati M, Flaxman AD, Lim S, Lozano R, Michaud C, GBD 2010: design, definitions, and metrics. Lancet. 2012 Dec 15;380(9859):2063-6. doi: 10.1016/S0140-6736(12)61899-6.
